# Differential Expression Profiles in the Midgut of *Triatoma infestans* Infected with *Trypanosoma cruzi*

Diego S. Buarque<sup>1</sup>, Glória R. C. Braz<sup>2</sup>, Rafael M. Martins<sup>3</sup>, Anita M. Tanaka-Azevedo<sup>4</sup>, Cícera M. Gomes<sup>4</sup>, Felipe A. A. Oliveira<sup>1</sup>, Sergio Schenkman<sup>5</sup>, Aparecida S. Tanaka<sup>1\*</sup>

**1** Department of Biochemistry, Escola Paulista de Medicina, Universidade Federal de São Paulo, São Paulo, Brazil, **2** Department of Biochemistry, Instituto de Química, Universidade Federal do Rio de Janeiro, Rio de Janeiro, Brazil, **3** Biology of Host Parasite Interactions Unit, Institut Pasteur, Paris, France, **4** Laboratory of Herpetology, Instituto Butantan, São Paulo, Brazil, **5** Department of Microbiology, Immunology and Parasitology, Universidade Federal de São Paulo, São Paulo, Brazil

## Abstract

Chagas disease, or American trypanosomiasis, is a parasitic disease caused by the protozoan *Trypanosoma cruzi* and is transmitted by insects from the Triatominae subfamily. To identify components involved in the protozoan-vector relationship, we constructed and analyzed cDNA libraries from RNA isolated from the midguts of uninfected and *T. cruzi*-infected *Triatoma infestans*, which are major vectors of Chagas disease. We generated approximately 440 high-quality Expressed Sequence Tags (ESTs) from each *T. infestans* midgut cDNA library. The sequences were grouped in 380 clusters, representing an average length of 664.78 base pairs (bp). Many clusters were not classified functionally, representing unknown transcripts. Several transcripts involved in different processes (e.g., detoxification) showed differential expression in response to *T. cruzi* infection. Lysozyme, cathepsin D, a nitrophorin-like protein and a putative 14 kDa protein were significantly upregulated upon infection, whereas thioredoxin reductase was downregulated. In addition, we identified several transcripts related to metabolic processes or immunity with unchanged expressions, including infestin, lipocalins and defensins. We also detected ESTs encoding juvenile hormone binding protein (JHBP), which seems to be involved in insect development and could be a target in control strategies for the vector. This work demonstrates differential gene expression upon *T. cruzi* infection in the midgut of *T. infestans*. These data expand the current knowledge regarding vector-parasite interactions for Chagas disease.

**Citation:** Buarque DS, Braz GRC, Martins RM, Tanaka-Azevedo AM, Gomes CM, et al. (2013) Differential Expression Profiles in the Midgut of *Triatoma infestans* Infected with *Trypanosoma cruzi*. PLoS ONE 8(5): e61203. doi:10.1371/journal.pone.0061203

**Editor:** Herbert B. Tanowitz, Albert Einstein College of Medicine, United States of America

**Received:** December 7, 2012; **Accepted:** March 7, 2013; **Published:** May 2, 2013

**Copyright:** © 2013 Buarque et al. This is an open-access article distributed under the terms of the Creative Commons Attribution License, which permits unrestricted use, distribution, and reproduction in any medium, provided the original author and source are credited.

**Funding:** This work was supported by Fundação de Amparo à Pesquisa do Estado de São Paulo (FAPESP) (Proc. no. 2005/03514-9; Proc no. 2007/58973-3; Proc. no. 2012/00723-0 and Proc. no. 2012/03657-8), Conselho Nacional de Desenvolvimento Tecnológico (CNPq), and INCT – Entomologia Molecular. The funders had no role in study design, data collection and analysis, decision to publish, or preparation of the manuscript.

**Competing Interests:** The authors have declared that no competing interests exist.

\* E-mail: tanaka.bioq@epm.br

## Introduction

Parasitic diseases transmitted by arthropods have been some of the most severe causes of human death in the world, especially in developing countries. Malaria, yellow fever, dengue and African trypanosomiasis are examples of arthropod-borne diseases transmitted to humans [1]; Chagas disease, or American trypanosomiasis, is another example of this type of disease. Chagas disease is caused by the protozoan parasite *Trypanosoma cruzi* and is transmitted by insects from the Triatominae subfamily [2].

Chagas disease remains prevalent in many Latin American countries, affecting an estimated eight million people [3], and it is correlated with poor living conditions. Although most acute infections are asymptomatic, approximately 30% become chronic, resulting in approximately 12,500 deaths annually. Moreover, there is neither a vaccine nor a preventive treatment to cure Chagas disease, as the drugs currently used have efficacies only in the acute phase of the disease, leading to several side effects in humans [3,4]. In contrast to the majority of parasites that transmit arthropod-borne diseases, *T. cruzi* is not inoculated in the host's saliva because this protozoan does not infect the salivary glands of the vector insect. Instead, the parasite colonizes the intestinal tract

and rectum of triatomines. As part of the feeding process, the insect defecates, and its feces, containing *T. cruzi*, remain on the skin of the vertebrate. Then, the host becomes infected via mucosa or at bite sites [5].

*T. cruzi* uses a blood feeding process to proliferate and develop inside the insect's midgut. However, the parasite must bypass the vector's defenses, which are composed of innate immunity molecules expressed in response to different types of infection [6]. The midgut of blood-sucking triatomines is considered an immune competent tissue [4], and it is suggested that inducible immune compounds from the intestinal tract can modulate parasite development [7–9]. Nevertheless, little information has been published regarding expression profiles in the midgut or the role of innate immunity for many important disease vectors [10], including triatomine bugs such as *Triatoma infestans*, which is one of the most important vectors of *T. cruzi* [11].

Studies on the molecular interactions of protozoa from the *Trypanosoma* genus and triatomine vectors are limited. Most of these studies address the interactions of parasites in the hemolymph as they move to the salivary glands of insects. In the case of *T. cruzi*, this parasite remains in the intestinal tract and therefore has minimal or no direct contact with hemolymph factors [12].

Thus, we aimed to identify molecules from the vector midgut that could be involved in the parasite-vector relationships using Expressed Sequence Tags (ESTs) sequencing and analysis.

The study of genomes from disease vectors is a helpful technique to identify targets with the aim of controlling insect development and parasite transmission. Although the genome sequencing of the triatomine insect *Rhodnius prolixus* is in progress, there are currently no efforts to sequence the *T. infestans* genome [11].

EST analysis is an alternative to genome studies that helps provide information about disease vectors. Some approaches that have been used to identify Chagas disease vector molecules include the analysis of expressed sequence tags (ESTs) from the salivary glands [13–15] and ovaries [16] of triatomine insects. However, no extensive investigations have been conducted concerning the *T. infestans* midgut.

In this work, we analyzed midgut cDNA sequences from insects infected with *T. cruzi* in comparison to uninfected *T. infestans*. Several ESTs matched with putative proteins related to the protection of triatomine insects against parasite challenges, which were modulated in infected *T. infestans* midguts. Expression patterns of some of these molecules were confirmed by qRT-PCR. This is the first EST profile analysis in the midgut of a triatomine insect infected with *T. cruzi*, which provides new insights towards understanding the role of midgut molecules in triatomine-*T. cruzi* interactions.

## Results and Discussion

### *T. infestans* EST sequencing profile

Expressed Sequencing Tag profiling of insects under stress or parasitic infection could provide information about related cellular functions, including growth, development and immune defense [17]. A total of 1,341 clones (661 and 680 clones from uninfected and infected insects, respectively) were sequenced to obtain ESTs from *T. infestans* midgut libraries. These raw data were subjected to cleaning steps, resulting in approximately 440 high-quality ESTs from each library. To obtain clusters, reads of the two libraries were assembled using the CAP3 program, which generated 380 clusters using sequences representing a minimum size of 76 base pairs (bp) (Table 1 and Data S1 – spreadsheet stats). A consensus sequence derived from two or more sequences was named ‘contig,’ and the term ‘singleton’ was used for single sequences. In this section, we will use the denomination ‘cluster’ to address ESTs from both contigs and singletons.

The average cluster length among all ESTs was 664.78 bp, and approximately 283 clusters were distributed in a range of 500–700 bp (Figure 1 and Data S1, spreadsheet stats). The fact that the majority of clusters were over 500 bp in length was an advantage because the production of larger clusters facilitated subsequent functional analysis [18]. Only clusters longer than 200 bp were selected for further analysis.

**Table 1.** Analysis summary of *T. infestans* ESTs.

| Description                                      | Number | %     |
|--------------------------------------------------|--------|-------|
| High quality ESTs                                | 872    | 100   |
| Contigs                                          | 380    | -     |
| Mean (bp)                                        | 664.78 | -     |
| BLATX NR protein database (<math>10^{-5}</math>) | 472    | 54.12 |

doi:10.1371/journal.pone.0061203.t001

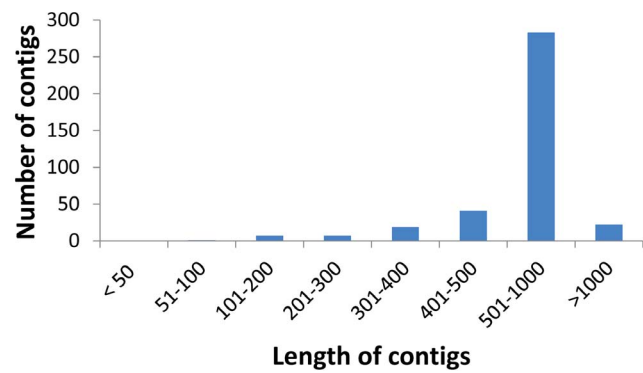

**Figure 1.** Length distribution of *T. infestans* clusters.

doi:10.1371/journal.pone.0061203.g001

For functional analysis, ESTs were matched against a subset of the non-redundant (nr) NCBI protein database (see NR-light in methods) using BLASTx. Approximately 55% of whole *T. infestans* midgut ESTs had a match in this database when implementing a cut-off E-value of  $1 \times 10^{-5}$  (Table 1 and Data S1). In the absence of *T. infestans* genomic information, we compared the clusters obtained to a preliminary set of *Rhodnius prolixus* proteins predicted from the genome of this insect. The fact that 241 out of 380 *T. infestans* clusters matched to predicted *Rhodnius* proteins with an E-value lower than  $10^{-5}$  showed that both of these triatomines have similar protein sets. In addition, some differences between these two Chagas disease vectors were observed: 139 of the predicted proteins appeared to be specific to *T. infestans*. From the 241 predicted proteins that matched the *Rhodnius* proteins, we highlighted 33 proteins classified as unknown; these are listed in the worksheet named “*Rhodnius* matches” (Data S1). Most of these sequences presented differential expression upon infection, and their relevance in the efficiency of *T. cruzi* infection will be investigated in future studies.

The EST profile was also analyzed in terms of a taxonomic classification by comparison to other taxa (Figure 2). As the computational time to blast sequences to the non-redundant protein database (nr) increased considerably, we built a protein database, named NR-light, that is a subset of nr, as described in the methods section. This database includes many arthropods, viruses, bacteria and protozoan parasites with well annotated genomes that commonly infect arthropods and some vertebrates. Figure 2 presents complementary information about the similarity of *T. infestans* clusters to the annotated proteins when they were blasted against the two datasets.

Because the NR-light database may lead to a bias towards insects, we observed that the highest percentage of clusters matched insects (65.45%), and approximately 19% of the clusters present in this group were similar to the predicted proteins from *T. infestans*. Another abundant class of clusters was related to other Hemipterans (approximately 19%), which corresponded to hits from insects such as *Triatoma dimidiata*, *Triatoma matogrossensis* and the pea aphid *Acyrtosiphum pisum*, the representative organism of this group (see Data S1). The high number matches to *A. pisum* sequences may be explained by the prevalence of this insect genome [19]. However, triatomine midgut sequences are scarce; therefore, our ESTs enhance the data related to Chagas disease vectors.

We also used a detailed functional classification system (Table 2; Data S1, worksheet class distribution and Data S2, worksheet <5%X column O) and the statistics of cluster classes for upregulated clusters (Table 3; Data S1, worksheet class distribu-

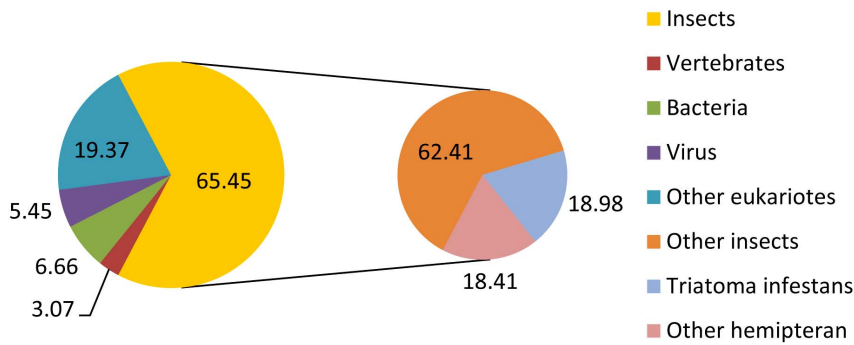

**Figure 2. A pie chart showing the species distribution of BLASTx hits of the *T. infestans* clusters for several organisms.**  
doi:10.1371/journal.pone.0061203.g002

tion and Data S2, worksheet up-reg) and downregulated clusters (Table 4; Data S1, worksheet class distribution and Data S2, worksheet down-reg). Many transcripts were classified as putative secreted proteins related to processes such as protein transcription and synthesis.

A large portion of transcripts comprised identified proteins representing unknown functions (Table 2). A number of these transcripts were found to be upregulated or downregulated in response to *T. cruzi* infection. Specifically, 21 unknown or

unknown conserved transcripts were upregulated (Table 3) whereas 52 were downregulated (Table 4) in *T. infestans* upon infection. It is possible that some proteins encoded by these transcripts may have novel functions in response to *T. cruzi* infection and are good targets for future studies.

Differential transcript expression was observed for genes that participate in many processes, such as energy metabolism, detoxification, immunity and proteinase control. Regarding the expression of important molecules involved in these processes and in vector-parasite relationships, we selected some representative contigs among those that were differentially expressed in uninfected insects and in insects infected with *T. cruzi* to quantify expression using qRT-PCR.

**Table 2. Functional classification of transcripts from all clusters.**

| Class                              | Number of Clusters | Number of ESTs |
|------------------------------------|--------------------|----------------|
| Putative secreted proteins         | 14                 | 62             |
| Nuclear regulation                 | 5                  | 8              |
| Transcription factor               | 3                  | 6              |
| Transcription machinery            | 9                  | 25             |
| Protein synthesis machinery        | 25                 | 42             |
| Protein export machinery           | 9                  | 12             |
| Protein modification machinery     | 19                 | 27             |
| Proteasome machinery               | 2                  | 2              |
| Transporters/storage               | 10                 | 22             |
| Oxidant metabolism/detoxification  | 6                  | 23             |
| Metabolism, carbohydrate           | 6                  | 9              |
| Metabolism, nucleotide             | 1                  | 1              |
| Metabolism, amino acid             | 2                  | 2              |
| Metabolism, lipid                  | 10                 | 15             |
| Signal transduction                | 18                 | 33             |
| Extracellular matrix/cell adhesion | 7                  | 17             |
| Cytoskeletal                       | 7                  | 18             |
| Transposable element               | 3                  | 3              |
| Metabolism, energy                 | 18                 | 50             |
| Unknown                            | 126                | 288            |
| Unknown, conserved                 | 54                 | 104            |
| Immunity                           | 7                  | 12             |
| Viral                              | 12                 | 73             |
| Nuclear export                     | 1                  | 1              |
| Secreted proteinase inhibitor      | 6                  | 14             |

doi:10.1371/journal.pone.0061203.t002

**Transcripts differentially expressed in *T. infestans* midgut**

**Down-regulated transcript.** A contig encoding a Thioredoxin reductase (Data S1, contig 573) was downregulated in infected insects (Figure 3). Thioredoxin reductase is an antioxidant

**Table 3. Functional classification of transcripts that originated from upregulated contigs.**

| Class                              | Number of Clusters | Number of ESTs |
|------------------------------------|--------------------|----------------|
| Putative secreted proteins         | 3                  | 14             |
| Nuclear regulation                 | 1                  | 2              |
| Transcription factor               | 1                  | 2              |
| Transcription machinery            | 2                  | 4              |
| Protein synthesis machinery        | 4                  | 10             |
| Transporters/storage               | 4                  | 9              |
| Oxidant metabolism/detoxification  | 2                  | 9              |
| Metabolism, carbohydrate           | 2                  | 4              |
| Metabolism, lipid                  | 1                  | 3              |
| Signal transduction                | 2                  | 7              |
| Extracellular matrix/cell adhesion | 1                  | 2              |
| Cytoskeletal                       | 2                  | 6              |
| Metabolism, energy                 | 1                  | 2              |
| Unknown                            | 7                  | 8              |
| Unknown, conserved                 | 4                  | 13             |
| Immunity                           | 1                  | 2              |
| Secreted proteinase inhibitor      | 1                  | 2              |

doi:10.1371/journal.pone.0061203.t003

**Table 4.** Functional classification of transcripts that originated from downregulated contigs.

| Class                              | Number of Clusters | Number of ESTs |
|------------------------------------|--------------------|----------------|
| Putative secreted proteins         | 4                  | 16             |
| Nuclear regulation                 | 1                  | 3              |
| Transcription machinery            | 1                  | 11             |
| Protein synthesis machinery        | 4                  | 11             |
| Protein export machinery           | 2                  | 4              |
| Protein modification machinery     | 1                  | 2              |
| Transporters/storage               | 1                  | 2              |
| Oxidant metabolism/detoxification  | 1                  | 7              |
| Metabolism, carbohydrate           | 1                  | 2              |
| Signal transduction                | 3                  | 20             |
| Extracellular matrix/cell adhesion | 2                  | 4              |
| Metabolism, energy                 | 5                  | 15             |
| Unknown                            | 9                  | 33             |
| Unknown, conserved                 | 7                  | 19             |

doi:10.1371/journal.pone.0061203.t004

enzyme that promotes the conversion of oxidized thioredoxin and can act together with the glutathione system to regenerate reduced glutathione, contributing to the detoxification of free radicals and impairing oxidative stress in hematophagous insects [20]. According to Paes et al. [21], low concentrations of molecules involved in oxidative stress promote the proliferation of *T. cruzi*. Therefore, the expression of thioredoxin reductase in infected bugs may be modulated by *T. cruzi* to allow parasite proliferation inside the *T. infestans* midgut.

**Up-regulated transcripts.** Contig 564 (Data S1) was upregulated (approximately 35-fold) in infected *T. infestans* compared to the control (Figure 4A). This contig matched the rhodnius biogenic amine binding-like protein [*Triatoma matogrossensis*] in the NR-light database (Data S1, column U) and presented the best match to nitrophorin in Conserved Domain Database (CDD) (Data S1, column DC). Nitrophorins are nitric oxide carriers that have been reported to play a role in the innate immunity of insects. Although nitrophorins are salivary gland molecules, they are lipocalins and are able to bind non-polar molecules such as nitric oxide [22]. According to Whitten et al. [10], nitric oxide production was upregulated when the triatomine insect *Rhodnius prolixus* was infected with *T. cruzi*. Because nitric oxide can react with other radicals to generate compounds toxic to *T. cruzi* [23], nitrophorin-like molecules might be upregulated through signaling mechanisms carried out by the parasite to aid its survival in the insect's midgut.

We found increased expression (approximately 90-fold) of contig 538 (Data S1) encoding a possible 14 kDa putative secreted protein in infected insects (Figure 4B). These transcripts did not match known proteins in the databases, including the Rhodnius database, suggesting that this is a new protein that has discovered in the midgut of *T. infestans*. Thus, elucidation of the role of this hypothetical protein merits further investigation as it was highly modulated by *T. cruzi* infection and seems to be involved in vector-parasite relationships.

The expression of lysozymes was also upregulated in infected insects (Figure 4C). Lysozymes catalyze the hydrolysis of glycosidic bonds of peptidoglycans present in bacterial cell walls and causes bacterial lysis [24]. Lysozymes are considered

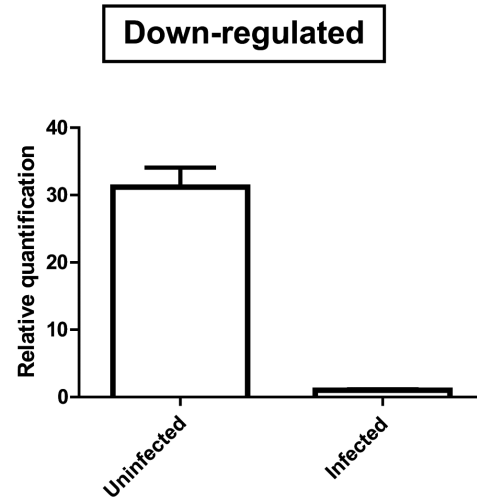

**Figure 3. qRT-PCR of Thioredoxin reductase upon *T. cruzi* infection.** The levels of mRNA from Thioredoxin reductase were obtained by relative quantification. Adult insects infected with *T. cruzi* and uninfected *T. infestans* were used for analysis (three biological samples were used for both the uninfected and infected groups). All data were normalized to 18S ribosomal RNA, representing the mean ( $n=3$ ) of identical triplicates  $\pm$  standard deviation. An unpaired *t* test was performed for statistical analysis, and differences were considered significant at  $P<0.05$ . Asterisks represent significant differences (\*\*\*)  $P<0.001$ .

doi:10.1371/journal.pone.0061203.g003

to be an antimicrobial peptide expressed in response to bacterial challenges [8]. However, high expression levels of lysozymes were observed upon the artificial injection of *T. cruzi* in the hemolymph of *Rhodnius prolixus* [25], indicating that this protein may also be involved in the modulation of *T. cruzi* infection in triatomine insects.

A contig encoding cathepsin D (Data S1, contig 183) was upregulated in the *T. infestans* midgut when infected with *T. cruzi* (Figure 4D). Cathepsin D is a lysosomal protease involved in digestion processes in triatomine insects. The expression of transcripts encoding cathepsin D was detected in the anterior midgut of *T. infestans* [26]. Borges et al. [27] showed that cathepsin D activity increased when the triatomine insect was infected with *T. cruzi* and that this activity was due to parasite colonization in the midgut.

Cystatin was another molecule that was found to be upregulated upon *T. cruzi* infection. Cystatins are reversible and tight-binding inhibitors of papain-like cysteine proteases, and they are widespread in plants, animals and microorganisms [28]. Although the number of cystatin transcripts remained constant in both libraries, qRT-PCR revealed that this inhibitor is upregulated in the anterior midgut when *T. infestans* is infected with *T. cruzi* (data published in Buarque et al. [29]). Our studies on *T. infestans* cystatins show that recombinant *T. infestans* cystatin (Tigutcystatin) is a tight-binding inhibitor ( $K_i=3.29$  nM) of the *T. cruzi* cysteine protease cruzipain [29]. Thus, *T. infestans* cystatins might be important in modulating *T. cruzi* colonization inside the insect midgut by inhibiting cruzipain, which is a virulence factor for the parasite *T. cruzi* [30].

In both libraries, we also identified contigs assembled from ESTs with unchanged expression related to several metabolic processes and important for *T. infestans* development. We list some of these contigs below (Table 5).

## Up-regulated

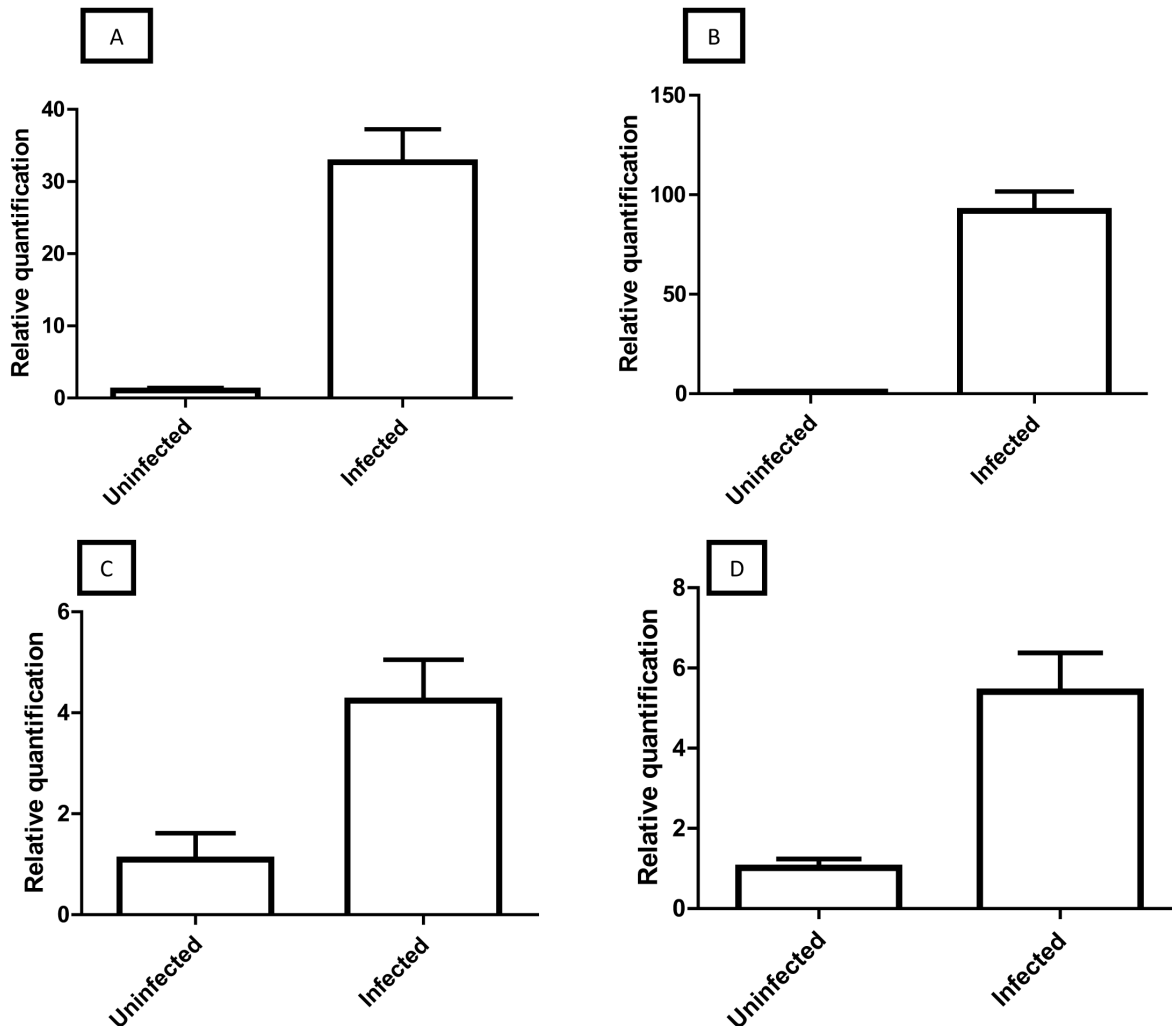

**Figure 4. qRT-PCR of four transcripts upregulated upon *T. cruzi* infection.** Amounts of mRNA from nitrophorin-like protein (A), 14 kDa protein (B), lysozyme (C) and cathepsin D (D) were obtained by relative quantification. Adult insects infected with *T. cruzi* and uninfected *T. infestans* were used for analysis (three biological samples were used for both the uninfected and infected groups). All data were normalized to 18S ribosomal RNA, representing the mean (n=3) of identical triplicates  $\pm$  standard deviation. An unpaired *t* test was performed for statistical analysis, and differences were considered significant at  $P < 0.05$ . Asterisks represent significant differences (\*\*  $P < 0.01$ ; \*\*\*  $P < 0.001$ ). doi:10.1371/journal.pone.0061203.g004

### Transcripts with unchanged expression upon *T. cruzi* infection

Transcripts encoding infestin, an anticoagulant protein from the *T. infestans* midgut that counteracts the host's hemostatic system by inhibiting thrombin and factor XIIa from coagulation cascades [31,32], were found in our analysis (Data S1, contig 256). Most of the activity of infestin-like inhibitors was found in the anterior midgut, suggesting that these anticoagulant molecules are synthesized and stored in the anterior midgut prior to the ingestion of blood [33]. No significant alterations in infestin expression were detected under *T. cruzi* infection (Figure 5). According to Lovato et al. [34], differences in infestin expression were observed 12 h after *T. cruzi* challenge, although the expression remained constant 36 h

after infection. In our work, midguts were dissected 24 h post-challenge; therefore, we suggest that infestin expression can fluctuate at different times of infection. We cannot exclude the possibility that infestin may play a role in the first hours after *T. cruzi* infection, which could explain the presence of proteins prior to the blood meal.

Some transcripts had significant matches to different insect lipocalins. These proteins play several roles, including the transport of small molecules in vertebrates and invertebrates [35]. In our set of ESTs, a contig was found that is related to fatty acid binding lipocalins (FABL) (Data S1, contig 457), which may be related to the transport of fatty acids [36]. Moreover, the contig identified was related to triabin-like lipocalins, which are thrombin

**Table 5.** A list of contigs with unchanged expression that are important for metabolic processes or defense in *T. infestans*.

| Putative protein | Nucleotide length (bp) | E-value   | Identity (%) | Species of best match          |
|------------------|------------------------|-----------|--------------|--------------------------------|
| Infestin         | 634                    | 1.00E-121 | 98           | <i>Triatoma infestans</i>      |
| FABL             | 624                    | 7.00E-44  | 77           | <i>Cimex lectularius</i>       |
| Triabin          | 779                    | 5.00E-14  | 31           | <i>Triatoma matogrossensis</i> |
| Defensin         | 525                    | 2.00E-47  | 92           | <i>Triatoma brasiliensis</i>   |
| JHBP             | 915                    | 2.00E-05  | 22           | <i>Daphnia pulex</i>           |

FABL – Fatty acid binding lipocalin.

JHBP – Juvenile hormone binding protein.

doi:10.1371/journal.pone.0061203.t005

inhibitors [37]. Triabin-like lipocalins were identified in salivary glands transcriptomes from *T. infestans* and *T. dimidiata* [15–16].

Defensin ESTs were also detected in the present EST analysis (Data S1, contig 582). Defensins are antimicrobial peptides involved in defense against infection with microorganisms [38]. We observed a similar expression profile in libraries from both uninfected and *T. cruzi* infected triatomines. Defensin expression is upregulated in the posterior midgut of triatomine insects upon *T. cruzi* infection. However, this antimicrobial peptide is not modulated by *T. cruzi* in the stomach, and it may reflect a *T. infestans* adaptation to control symbiont multiplication [9].

Another putative protein, juvenile hormone binding protein, was identified. This protein is involved in the development and reproduction of insects and was proposed as a potential target to control the vector insect and consequently decrease the transmission of Chagas disease [11].

In summary, this work provides the first global analysis of expression profiles from the midgut of a Chagas disease vector under *T. cruzi* infection, with a resulting repertoire of transcripts that are important in the elucidation of metabolic processes in *T. infestans*. We demonstrated differential expression of several ESTs upon *T. cruzi* infection. Moreover, we reported a largely upregulated putative 14 kDa protein that has not been described previously. Together, the data provide relevant information regarding the interaction of *T. cruzi* with the vector insect and

new target molecules for future research in the control of Chagas disease.

## Materials and Methods

### Ethics Statement

Experimental protocols for mouse infections were carried out in accordance with the guidelines of the Ethics Committee in Research from the Federal University of São Paulo (CEP – UNIFESP), approved under registry 1850/08.

### Insects and infection protocol

*T. infestans* were reared under controlled temperature ( $27 \pm 2.0^\circ\text{C}$ ) under a 12/12 light/dark cycle. Adult male insects ( $n = 10$ ) that had been starved for 30 days were allowed to feed *ad libitum* on anesthetized mice (ketamine 150 mg/kg and xylazine 7 mg/kg). Insect tissues were dissected 24 h after feeding. For infection experiments, insects were infected orally by feeding *ad libitum* on anesthetized mice infected with *T. cruzi* Y strain, and these insects were also dissected 24 h after feeding. Mice infection was performed according to Kollien and Schaub [39], and the population density ( $1 \times 10^6$  parasites/mL) was determined using a Neubauer chamber.

### cDNA library construction

*T. infestans* mRNA was extracted from 10 anterior midguts from insects belonging to the control group (uninfected insects) and 10 anterior midguts from the infected insects group using TRIZOL reagent (Invitrogen, Carlsbad, CA). The PCR-based cDNA library was created following the guidelines of the SMART cDNA library construction kit (Clontech), which provides an oligonucleotide named SMART IV in the first-strand synthesis to produce a high percentage of full-length, double-stranded cDNA. *T. infestans* midgut total RNA was used for reverse transcription to cDNA using MMLV reverse transcriptase (Clontech), the SMART IV oligonucleotide, and the CDS III/primer (Clontech). The reaction was carried out at  $42^\circ\text{C}$  for 1 h.

A long-distance PCR-based method was utilized to perform the second-strand synthesis by using Advantage Taq polymerase mix (Clontech), a 5' PCR primer and a CDS III/3' primer, which inserts *Sfi*I and B restriction enzyme sites at the end of the cDNA. The PCR conditions were  $95^\circ\text{C}$  for 1 min, 19 cycles of  $95^\circ\text{C}$  for 15 s and  $68^\circ\text{C}$  for 6 min. A 5- $\mu\text{L}$  sample was analyzed on a 1.1% agarose/EtBr (0.1 mg/mL) gel to check the quality and abundance of the cDNA. Next, DNA polymerase was inactivated with proteinase K, followed by precipitation, and double-stranded cDNA was then digested with *Sfi*I restriction enzyme at  $50^\circ\text{C}$  for 2 h. Then, cDNA was fractionated on a ChromaSpin-400 column (Clontech). The fractions were analyzed on a 1.1% agarose/EtBr

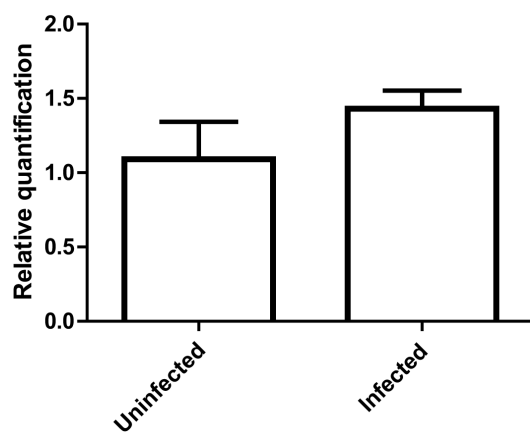

**Figure 5. qRT-PCR of infestin.** Adult insects infected with *T. cruzi* and uninfected *T. infestans* were used for analysis (three biological samples were used for both the uninfected and infected groups). All data were normalized to 18S ribosomal RNA, representing the mean ( $n=3$ ) of identical triplicates  $\pm$  standard deviation. An unpaired *t* test was performed for statistical analysis.

doi:10.1371/journal.pone.0061203.g005

(0.1 mg/mL) gel, and fractions containing cDNA were pooled. The cDNA was precipitated and ligated into a  $\lambda$ TriplEx2 vector (Clontech), and the ligation was packaged using GigaPack Gold III Plus packaging extract (Stratagene) according to the manufacturer's guidelines. The packaged library was plated by infecting log-phase XL1-Blue *Escherichia coli* cells (Clontech) for cDNA library amplification and titering unamplified and amplified libraries.

### Sequencing of *T. infestans* cDNA libraries

The *E. coli* BM 25.8 strain was used to inoculate 2 mL of LB broth medium at 31°C with shaking at 180 rpm until the OD<sub>600</sub> reached 1.3. Next, MgCl<sub>2</sub> was added to the culture (10 mM final concentration). Then, the bacterial culture was combined with separate amplified cDNA libraries, and the mixture was incubated at 31°C without shaking. Next, 400  $\mu$ L of LB medium and the bacteria, including the libraries, were incubated for an additional 1 h at 31°C with shaking (225 rpm). Finally, infected cells (1–10  $\mu$ L) were spread on an LB/ampicillin plate and grown overnight at 31°C to obtain isolated clones, maintaining the excised pTriplEX2 containing the DNA inserts.

Following an excision protocol, mini plasmidial preparations (minipreps) were performed using bacteria BM 25.8 clones according to Sambrook [40]. Then, minipreps (200 ng) were used as templates for sequencing reactions. The primer used was upstream from the inserted cDNA (LD insert 5'-CTCGGGAAGCGCGCCATTGTGTTGGT-3'), and the sequencing reaction was performed on an MJ PT-200 thermocycler. The sequencing products were precipitated using ethanol and sodium acetate buffer. Finally, DNAs were sequenced on an ABI 3130 sequencer (Applied Biosystems).

### Bioinformatics analysis

Expressed sequence tags (ESTs) were trimmed of primer and vector sequences and then assembled and compared with other databases using programs from the National Center for Biotechnology Information (NCBI). The cleaned, non-assembled sequences were deposited in dbEST from NCBI under accession numbers JK733006–JK733438 and JK733439–JK733877 for ESTs from uninfected and infected *T. infestans* libraries, respectively.

The BLAST tool [41] and CAP3 assembler [42] were used to compare and assemble the sequences. For functional description of the transcripts, the Blast tool [43] was used with a program [44] developed by Jose Ribeiro (NIAID – NIH) to compare the sequences with the following databases: Conserved Domain Database (CDD) [45]; Protein families (Pfam) [46]; Orthologous eukaryotic domains (Kog) [47]; simple modular architecture tool (Smart) [48] using rpsBlast; Mit-pla and ribosomal RNA (rRNA) using BlastN and Swissprot; Gene Ontology (GO) [49]; and a subset of the Non-Redundant Database (NR) that we called NR-light using BlastX. This subset of the non-redundant database comprises proteins from the organisms having the following starts (or ends, when the bracket indicates closure): “[*Tribolium*”], “[*Apis m*”], “[*Anopheles*”], “[*Aedes*”], “[*Culex*”], “[*Ixodes*”], “[*Glossina*”], “[*Ochlerotatus*”], “[*Tabanus*”], “[*Chrysops*”], “[*Amblyomma*”], “[*Ornithod*”], “[*Argas*”], “[*Rhipicephalus*”], “[*Boophilus*”], “[*Phlebotomus*”], “[*Lutzomyia*”], “[*Simulium*”], “[*Rhodnius*”], “[*Panstrongylus*”], “[*Triatoma*”], “[*Dipetalogaster*”], “[*Mus m*”], “[*Nasonia*”], “[*Strongylocentrotus*”], “[*Daphnia*”], “[*Homo sa*”], “[*Arabidopsis*”], “[*Escherichia*”], “[*Pseudomonas*”], “[*Streptococcus*”], “[*Acyrtosiphon*”], “[*Pediculus*”], “[*Ciona*”], “[*Danio*”], “[*Caenorhabditis el*”], “[*Drosophila mela*”], “[*Plasmodium*”], “[*Haemaphysalis*”], “[*Cimex*”], “[*Rickettsia*”], “[*Asaia*”], “[*Klebsiella*”], “[*Serratia*”], “[*Enterobacter*”], “[*Trypanosoma*”], “[*Leishmania*”], “[*virus*”], “[*Saccharomyces*”], “[*Neurospora*”], “[*Aplysia*”],

“[*Babesia*”], “[*Toxoplasma*”], “[*Nocardia*”], “[*Rhodococcus*”], “[*Streptomyces*”], “[*Ceratitis*”], “[*Hyalomma*”], “[*Brugia*”], “[*Branchiostoma*”], “[*Bos ta*”], “[*Gallus g*”], “[*Hydra*”], “[*Orizasa*”], “[*Nephila*”], “[*Titus*”], “[*Susca*”], “[*Rattusra*”], “[*Canisfa*”], “[*Argiope*”], “[*Araneus*”], “[*Acanthoscurria*”], “[*Agelenopsis*”], “[*Schistosoma*”], “[*Bombyxmor*”], “[*Bothrops*”], “[*Ancylostoma*”], “[*Necator*”], “[*Bungarus*”], “[*Crotalus*”], “[*Hirudo*”], “[*Desmodus*”], “[*Xenopsylla*”], “[*Ctenocephalides*” and “[*Caenorhabditis elegans*”].

The sequences were also blasted against a *Rhodnius prolixus* protein database (Data S1). This database was built through automatic gene previsions obtained using GeneID software [50] and trained with a protein dataset deduced from an extensive *Rhodnius* transcriptome (data not published but available at [http://rhodnius.iq.ufjf.br/English/index.php?option=com\\_content&view=article&id=3&Itemid=4](http://rhodnius.iq.ufjf.br/English/index.php?option=com_content&view=article&id=3&Itemid=4)). GeneID training and protein prediction (data not published) were performed by Dr. Rafael Dias Mesquita (IQ-UFRJ-Brazil), who kindly allowed us to use this information. The ESTs from the two libraries, non-infected insects and insects infected with *T. cruzi*, were assembled together. However, we controlled the quantity of reads from each library that were assembled to form each cluster. This procedure enabled us to predict which clusters would have downregulated, upregulated or unchanged expression upon infection with *T. cruzi*.

Another program, kindly provided by Dr. José Marcos Ribeiro (NIAID – NIH), was used to organize the blast results. This program inserted the relevant information into a column-hyperlinked excel spreadsheet (Data S1). One of these programs, named “Classifier,” was used to read all blast results for each cluster; it was also used to functionally classify and then propose names for the proteins potentially coded by the cluster.

Another program, assembly joiner, extracted the coding sequences (CDSs) from the clusters, eliminated the 5' and 3' UTRs when present and corrected the frameshifts by substituting stop codons in the middle of each sequence. In addition, this program deleted the truncated codon by replacing the unknown triplet with X in the amino acid sequence. The resulting protein sequences were also blasted against the databases cited above, and the blast results were listed in another excel spreadsheet (Data S2). In this spreadsheet, there are five worksheets as follows: the first shows the most reliable data (<5% X), the second shows all results, and the other three show the separate analyses of the upregulated, downregulated and unchanged clusters.

### Quantitative RT-PCR (qRT-PCR)

Quantitative RT-PCR (qRT-PCR) was performed using three biological samples for each group (infected and uninfected insects), each obtained from a pool of four insects. Total RNA was extracted from the anterior midgut using TRIzol reagent (Invitrogen) and quantified using NanoVue equipment (GE Healthcare). Then, 1  $\mu$ g of RNA was treated with 1 Unit of DNase (Fermentas) for 1 h at 37°C. Reactions were stopped by adding EDTA and heating for 10 min at 65°C. cDNA synthesis was performed using the ImProm-II<sup>TM</sup> Reverse Transcription System (Promega) following the manufacturer's guidelines.

Quantitative RT-PCR was performed following the methods described by Livak and Schmittgen [51] for delta delta Ct calculations to conduct relative quantification of the transcripts. The calibrator was the uninfected group for upregulated transcripts and the infected group for downregulated transcripts. Anterior midgut cDNAs from *T. cruzi*-infected and non-infected *T. infestans* were quantified using SYBR<sup>®</sup> Green PCR Master Mix (Applied Biosystems) in a 7500 Real-Time PCR System (Applied Biosystems). The qRT-PCR reaction consisted of 1  $\mu$ L of 10-fold

diluted cDNA (5 ng), 6  $\mu$ L of SYBR<sup>®</sup> Green and 0.3  $\mu$ M of each primer (Primer sequences are in Data S3) in a 12  $\mu$ L total volume. 18S ribosomal RNA was used as the internal control. The PCR program comprised 40 cycles at 94°C (15 seconds) and 60°C (1 min), followed by melt curve generation. Melt curves were analyzed to check the specificity of amplification. Reactions were performed in triplicate (for each biological sample), and all values are represented as the mean  $\pm$  standard deviation. An unpaired t test was conducted for statistical analysis, and a significant difference was accepted at  $P < 0.05$ .

## Supporting Information

**Data S1 (TI-S1) Hyperlinked excel file with assembled contigs and spreadsheets containing information about the best hits in databases and a classification of contigs.** (XLSX)

**Data S2 (TI-S2) Hyperlinked excel file with coding sequence information.** (XLSX)

## References

- Ursic-Bedoya R, Buchhop J, Joy JB, Durvasula R, Lowenberger C (2011) Prolixicin: a novel antimicrobial peptide isolated from *Rhodnius prolixus* with differential activity against bacteria and *Trypanosoma cruzi*. *Insect Mol Biol* 20 (6): 775–786.
- Bussacos ACM, Nakayasu ES, Hecht MM, Assumpção TCF, Parente JA, et al. (2011) Redundancy of proteins in salivary glands of *Panstrongylus megistus* secures prolonged procurement for blood meal. *J proteom* 74: 1693–1700.
- Rassi Jr A, Rassi A, Marin-Neto JA (2010) Chagas disease. *Lancet* 375: 1388–1402.
- Ursic-Bedoya RJ, Lowenberger CA (2007) *Rhodnius prolixus*: Identification of immune-related genes up-regulated in response to pathogens and parasites using suppressive subtractive hybridization. *Dev Comp Immunol* 31: 109–120.
- Mesquita RD, Carneiro AB, Bafica A, Gazos-Lopes L, Takiya CM, et al. (2008) *Trypanosoma cruzi* infection is enhanced by vector saliva through immunosuppressant mechanisms mediated by lysophosphatidylcholine. *Infect Immun* 76 (12): 5543–5552.
- Kavanagh K, Reeves EP (2007) Insect and mammalian innate immune responses are much alike. *Microbe* 2: 596–599.
- Araujo CAC, Wanick PJ, Stock P, Mayer C, Jansen AM, et al. (2006) Sequence characterization and expression patterns of defensin and lysozyme encoding genes from the gut of the reduviid bug *Triatoma brasiliensis*. *Insect Biochem Mol Biol* 36: 547–560.
- Ursic-Bedoya RJ, Nazzari H, Cooper D, Triana O, Wolff M, et al. (2008) Identification and characterization of two novel lysozymes from *Rhodnius prolixus*, a vector of Chagas disease. *J insect Physiol* 54: 593–603.
- Wanick PJ, Jansen AM, Araújo CAC (2011) *Trypanosoma cruzi* infection modulates the expression of *Triatoma brasiliensis* *def1* in the midgut. *Vec Born Zoonot Dis* 11(7): 845–847.
- Whitten S, Sun F, Tew I, Schaub G, Soukou C, et al. (2007) Differential modulation of *Rhodnius prolixus* nitric oxide activity following challenge with *Trypanosoma rangeli*, *T. cruzi* and bacterial cell wall components. *Insect Biochem Mol Biol* 37 (5): 440–452.
- Avila ML, Tekiel V, Moretti G, Nicosia S, Bua J, et al. (2011) Gene Discovery in *Triatoma infestans*. *Parasit Vectors* 4:39.
- Lopez L, Morales G, Ursic R, Wolff M, Lowenberger CA (2003) Isolation and characterization of a novel insect defensin from *Rhodnius prolixus*, a vector of Chagas disease. *Insect Biochem Mol Biol* 33: 439–447.
- Santos A, Ribeiro JMC, Lehane MJ, Gontijo NF, Veloso AB, et al. (2007) The salivary transcriptome of the blood-sucking bug *Triatoma brasiliensis* (Hemiptera, Triatominae). *Insect Biochem Mol Biol* 37: 702–712.
- Assumpção TCF, Francischetti IBM, Andersen JF Schwarz A, Santana JM, et al. (2008) An insight into the salivome of the blood-sucking bug *Triatoma infestans*, a vector of Chagas' disease. *Insect Biochem Mol Biol* 38: 213–232.
- Kato H, Jochim RC, Gomez EA, Sakoda R, Iwata H, et al. (2010) Repertoire of dominant transcripts from the salivary glands of the blood-sucking bug, *Triatoma dimidiata*, a vector of Chagas disease. *Infect Genet Evol* 10: 184–191.
- Medeiros MN, Logullo R, Ramos IB, Sorgine MHF, Paiva-Silva GO, et al. (2011) Transcriptome and gene expression profile of ovarian follicular tissue of the triatomine bug *Rhodnius prolixus*. *Insect Biochem Mol Biol* 41: 823–831.
- Etebari K, Palfreyman RW, Schlipalius D, Nielsen LK, Glatz RV, et al. (2011) Deep sequencing-based transcriptome analysis of *Plutella xylostella* larvae parasitized by *Diadegma semiclausum*. *BMC Genomics* 12: 446.
- Wommack KE, Bhavsar J, Ravel J (2008) Metagenomics: read length matters. *Appl Environ Microbiol* 74 (5), 1453–1463.
- International\_Aphid\_Genome\_Consortium: Genome sequence of the pea aphid *Acyrtosiphon pisum* (2010) *PLoS Biol* 8, e1000313.
- Graça-Souza AV, Maya Monteiro AV, Paiva-Silva GO, Braz GRC, Paes MC, et al. (2006) Adaptations against heme toxicity in blood-feeding arthropods. *Insect Biochem Mol Biol* 36: 322–335.
- Paes MC, Consentino-Gomes D, de Souza CV, Nogueira NP, Meyer-Fernandes JR (2011) The Role of Heme and Reactive Oxygen Species in Proliferation and Survival of *Trypanosoma cruzi*. *J Parasitol Res* 174614.
- Ascenzi P, Gradoni L (2002) Nitric oxide limits parasite development in vectors and in invertebrate intermediate hosts. *IBMB Life* 53 (2), 121–123.
- Piacenza L, Peluffo G, Alvarez MN, Martinez A, Radi R (2012) *Trypanosoma cruzi* antioxidant enzymes as virulence factors in Chagas disease. *Antioxid Redox Signal* In press.
- Kollien AH, Fechner S, Wanick PJ, Schaub GA (2003) Isolation and characterization of a cDNA encoding for a lysozyme from the gut of the Reduviidae bug *Triatoma infestans*. *Arch Insect Biochem Physiol* 53 (3), 134–145.
- Mello CB, Garcia ES, Ratcliffe NA, Azambuja P (1995) *Trypanosoma cruzi* and *Trypanosoma rangeli*: interplay with hemolymph components of *Rhodnius prolixus*. *J Invertebr Pathol* 65 (3), 261–268.
- Balczun C, Siemanowski J, Pausch JK, Helling S, Marcus K, et al. (2012) Intestinal aspartate proteases TiCatD and TiCatD2 of the haematophagous bug *Triatoma infestans* (Reduviidae): Sequence characterisation, expression pattern and characterisation of proteolytic activity. *Insect Biochem Mol Biol* 42 (4), 240–250.
- Borges EC, Machado EMM, Garcia ES, Azambuja P (2006) *Trypanosoma cruzi*: effects of infection in cathepsin D activity in the midgut of *Rhodnius prolixus*. *Exp Parasitol* 112: 110–133.
- Turk V, Stoka V, Turk D (2008) Cystatins: biochemical and structural properties, and medical relevance. *Front Biosci* 13: 5406–5420.
- Buarque DS, Spindola LM, Martins RM, Braz GR, Tanaka AS (2011) Tigutocystatin, a cysteine protease inhibitor from *Triatoma infestans* midgut expressed in response to *Trypanosoma cruzi*. *Biochem Biophys Res Commun* 413 (2), 241–247.
- Scharfstein J, Lima APCA (2008) Roles of Naturally Occurring Protease Inhibitors in the modulation of Host Cell Signaling and Cellular Invasion by *Trypanosoma cruzi*. *Subcell Biochem* 47: 140–154.
- Campos IT, Amino R, Sampaio CA, Auerswald EA, Friedrich T, et al. (2002). Infestin, a thrombin inhibitor presents in *Triatoma infestans* midgut, a Chagas' disease vector: gene cloning, expression and characterization of the inhibitor. *Insect Biochem Mol Biol* 32: 991–997.
- Campos IT, Tanaka-Azevedo AM, Tanaka AS (2004) Identification and characterization of a novel factor XIIa inhibitor in the hematophagous insect *Triatoma infestans* (Hemiptera: Reduviidae). *FEBS Lett* 577(3), 512–516.
- Araujo RN, Campos ITN, Tanaka AS, Santos A, Gontijo NF, et al. (2007) *Brasiliensin*, A novel intestinal thrombin inhibitor from *Triatoma brasiliensis* (Hemiptera: Reduviidae) with an important role in blood intake. *Int J Parasitol* 37: 1351–1358.
- Lovato DV, Amino R, Gonzalez Y, Miranda A, Schenkman S, et al. (2011) Infestin 1R, an intestinal subtilisin inhibitor from *Triatoma infestans* able to impair mammalian cell invasion by *Trypanosoma cruzi*. *Exp Parasitol* 129 (4), 362–367.
- Flower DR, North AC, Sansom CE (2000) The lipocalin protein family: structural and sequence overview. *Biochim Biophys Acta* 1482: 9–24.
- Mans BJ, Ribeiro JMC (2008) Function, mechanism and evolution of the moubatin-clade of soft tick lipocalins. *Insect biochem Mol Biol* 38: 841–852.



37. Fuentes-Prior P, Noeske-Jungblut C, Donner P, Schleuning WD, Huber R, et al. (1997). Structure of thrombin complex with triabin, a lipocalin-like exosite-binding inhibitor derived from a triatomine bug. *Proc Natl Acad Sci* 94: 11845–11850.
38. Raj PA, Dentino AR (2002). Current status of defensins and their role in innate and adaptive immunity. *FEMS Microbiol Lett* 206: 9–18.
39. Kollien AH, Schaub GA (1998) *Trypanosoma cruzi* in the rectum of the bug *Triatoma infestans*: effects of blood ingestion by the starved vector. *Am J Trop Med Hyg* 59 (1): 166–170.
40. Sambrook J (1989) *Molecular cloning: a laboratory manual*, second ed. Edited by Fritsch F, Maniatis T.
41. Altschul SF, Gish W (1996) Local alignment statistics. *Methods Enzymol* 266: 460–480.
42. Huang X, Madan A (1999) CAP3: a DNA sequence assembly program. *Gen Res* 9: 868–877.
43. Altschul SF, Madden TL, Schaffer AA, Zhang J, Zhang Z, et al. (1997) Gapped BLAST and PSI-BLAST: a new generation of protein database search programs. *Nucleic Acid Res* 25: 3389–3402.
44. Guo Y, Ribeiro JM, Anderson JM, Bour S (2009) dCAS: a desktop application for cDNA sequence annotation. *Bioinf.* 25(9): 1195–1196.
45. Marchler-Bauer A, Panchenko AR, Shoemaker BA, Thiessen PA, Geer LY, et al. (2002) CDD: a database of conserved domain alignments with links to domain three-dimensional structure. *Nucleic Acid Res* 30: 281–283.
46. Bateman A, Birney E, Durbin R, Eddy SR, Howe KL, et al. (2000) The Pfam protein families database. *Nucleic Acids Res* 28: 263–266.
47. Tatusov RL, Fedorova ND, Jackson JD, Jacobs AR, Kiryutin B, et al. (2003) The COG database: an updated version includes eukaryotes. *BMC Bioinformatics*. 4: 41.
48. Letunic I, Goodstadt L, Dickens NJ, Doerks T, Schultz J, et al. (2002) Recent improvements to the SMART domain-based sequence annotation resource. *Nucleic Acid Res* 30: 242–244.
49. Ashburner M, Ball CA, Blake JA, Botstein D, Butler H, et al. (2000) Gene ontology: tool for the unification of biology. The Gene Ontology Consortium. *Nat Genet* 25: 25–29.
50. Blanco E, Parra G, Guigó R (2002) Using geneid to Identify Genes. In: Baxevanis, A. (Eds.), *Current Protocols in Bioinformatics*. Unit 4.3. John Wiley & Sons Inc., New York.
51. Livak KJ, Schmittgen TD (2001) Analysis of relative gene expression data using real time quantitative PCR and the 2<sup>-[Delta][Delta]CT</sup> method. *Methods* 25: 402–408.
