# Supplementary material for: Differential Expression Profiles in the Midgut of Triatoma infestans Infected with Trypanosoma cruzi
Source: PLoS One. 2013 May 2;8(5):e61203. doi: 10.1371/journal.pone.0061203 (PMC3642171; doi:10.1371/journal.pone.0061203)
Supplement: Data S1 — (TI-S1) Hyperlinked excel file with assembled contigs and spreadsheets containing information about the best hits in databases and a classification of contigs. (XLSX) [file pone.0061203.s001.xlsx]

## Sheet: All
Contig link	Order number	Number of sequences and link to TSA file	Number of sequences	Lenght	PolyA at	Qual and link	Infected	Not Infected	Inf - nInf |H-I|	dif infedted - non infected	Annotation	Class	Database	E value	Coverage	Length of nt seq	Larger orf (nt)	Larger pep	Frame of larger ORF	Best match to NR-LIGHT protein database	E value	Number of matches	Match	Score	Extent of match	Length of best match	% identity	% Coverage	Mismatches	Gaps	First residue of match	First residue of sequence	Number of segments	Frame	Frame shift?	Orientation	Species of best match	Best match to SWISSP protein database	E value	Number of matches	Match	Score	Extent of match	Length of best match	% identity	% Coverage	Mismatches	Gaps	First residue of match
TI_asb-2	2	1	1	537	488	59	1	0	1	1	Ribosomal protein L6e	ps	PFAM	2e-38	103.7	537	354	CAIGPFTLNGVPLRRIHPNYVIATSARIDMSEVNVPSHINDKYFKRIKTKKAKKDDGEIFAAKKEPYKPSEQRRIDQKALDKAILKAIKKSPDAAHYRRYLCAMFGLRSSQYPHRMKF	2	ribosomal protein L6	4E-024	10	gi|253683402	111	115	273	49	42	58	0	144	1	2	2	Y	FOR	Nasonia vitripennis	60S ribosomal protein L6 OS=Chinchilla lanigera GN=RPL6 PE=2 SV=3	4E-016	10	sp|Q6QMZ4|RL6_CHILA	84.3	115	288	39	40	70	0	177
TI_asb-5	5	3	3	710		81	3	0	3	3	Choline transporter-like protein	tr	KOG	2e-36	40.5	710	705	NLANIKELWLTLTIILGILLLIALIVIIFLRKRIVIAITLIKEGSKAISSVISTLFFPIIPWCLKCCVVIWVLFIAFHLFSLGTQVFKAHGLNGMCKCEDKYENLKNGDVCNPKLFQELCHNQPSGTTCTTAGCRYYEMDSGSFVVYLHLFNAFGFFWGLWFVSGLSDMILAGTFAKWYWTFDKRRVPFFAVTESTARTLRHHLGTIALGSLIISICSFIRAIIEYTEKKVKSYE	2	hypothetical protein TcasGA2_TC001323	9E-049	10	gi|270002312	195	206	753	45	27	112	0	386	92	1	2	N	FOR	Tribolium castaneum	CTL-like protein 2 OS=Anopheles gambiae GN=AGAP010343 PE=3 SV=4	2E-046	10	sp|Q7PRJ0|CTLH2_ANOGA	185	211	790	43	27	120	5	421
TI_asb-6	6	1	1	1006	835	35	1	0	1	1	Unknown product	uk				1006	231	FFFFFFGKKTRPWRVPPKWEKNKSGGFFYVKKKKGGVFFFFFFFWFFLRRTFFFFFFSFLLKLFVLTPFLFLKKIYF	4
TI_asb-8	8	1	1	641		53	0	1	1	-1	PLN02838 3-hydroxyacyl-CoA dehydratase subunit of elongase	met/lipd	PRK	4e-38	77.3	641	573	HFISGNPLNTLWDVVKTTLLLFQNAALLEVLNVALGFVRSNLGLTFVQVMSRVVVVCGVLWATPTAPLSYGLPLLLIAWSITEVIRYSFYALNLIGTVPYFLIWCRYTFFYALYPIGVSGELLCLFAAQSFISQSKQWTIEFPNCLNFTFSYHYFLLGIMATYPFLFPKLYLYMIDQRKKIIVNPKEKKHS	2	ptpla domain protein	9E-050	10	gi|170050795	198	173	232	56	75	76	0	45	29	1	2	N	FOR	Culex quinquefasciatus	3-hydroxyacyl-CoA dehydratase 2 OS=Bos taurus GN=PTPLB PE=2 SV=2	4E-035	10	sp|Q2KIP8|HACD2_BOVIN	147	186	254	40	73	111	0	64
TI_asb-9	9	1	1	685		53	0	1	1	-1	4-hydroxyphenylpyruvate dioxygenase	met/aa	KOG	2e-72	54.8	685	630	KMTTYTDKGPPLEGGKFLCFDHIVFWVGNAKQAASYYCTRMGFQHIAYKGLETGSREYAAHVVQQNKIKFVFVSAYEPKEKEVNLHVAKHGDGVKDVAFTVEDIHLIIKKAKERGATIVRDIWEERDEHGVVQFATVKTFGDTTHTFVQRSAYKGLFLPGYRASNRNDVLSDKLPPAKLDFIDHVVGNQPDLSMESAAKWYEKTLMFHRF	1	4-hydroxyphenylpyruvate dioxygenase	7E-088	10	gi|157105932	325	209	381	73	55	56	0	1	58	1	1	N	FOR	Aedes aegypti	4-hydroxyphenylpyruvate dioxygenase OS=Rattus norvegicus GN=Hpd PE=1 SV=3	3E-070	10	sp|P32755|HPPD_RAT	265	209	393	59	53	85	0	1
TI_asb-10	10	1	1	211		16	1	0	1	1	Unknown product	uk				211	141	SRFDPSRSDMFFYFFFLKKNPKTFDAFRSKTPLVWVRNSSQGWLSTF	6	nonstructural protein precursor	2E-007	1	gi|20451029	56.6	29	1795	86	2	4	0	973	1	1	1	N	FOR	Triatoma virus
TI_asb-11	11	1	1	701		41	1	0	1	1	Membrane-associated guanylate kinase MAGUK (contains PDZ SH3 HOOK and GUK )	met/nuc	KOG	7e-71	55.7	701	609	SYEAVCQQRIDYTRPVIILGPLKDRINDDLISEFPEQFGSCVPHTTRPKREYEVDGRDYHFVSSREQMEKDIQNHLFIEAGQYNDNLYGTSVSSVKEVAHKGKHCILDVSGNAIKRLQVAMLYPIAIFIKPKSIESIMEMNKRMTEEQAKKTFERALKLEQDFGEFFTAVVQGDTPEEIYQKVKDVINEQSGPTIWVASKDPL	3	Discs large 1 tumor suppressor protein, putative	1E-100	10	gi|242023647	365	203	473	86	43	27	0	271	3	1	3	N	FOR	Pediculus humanus corporis	Disks large 1 tumor suppressor protein OS=Drosophila melanogaster GN=dlg1 PE=1	5E-097	10	sp|P31007|DLG1_DROME	353	203	970	83	21	34	0	768
TI_asb-12	12	1	1	655		48	0	1	1	-1	cathepsin D	pm	NR-LIGHT	2e-86	55.1	655	552	PRPMEELQRELKDYKDSLSMYPLLKKNGREVLRNHLNTQYYGNITLGTPPQQFTVIFDTGSSDLWVPATICTSIACKRHNTYDHGRSSTYKPDGRIMRLAYVKGSMVGIISSDDLQIGELKVKNQLFGEAVEVADLPFARAKADGILGLAFPSIAYGQNVPPFHNMIKQGLLEKPVFSFYLNRN	2	cathepsin D	2E-086	10	gi|301030231	320	215	390	71	55	62	0	1	8	1	2	N	FOR	Triatoma infestans	Cathepsin D OS=Gallus gallus GN=CTSD PE=1 SV=1	6E-042	10	sp|Q05744|CATD_CHICK	170	201	398	44	51	112	8	24
TI_asb-13	13	2	2	733	559	54	2	0	2	2	Unknown product	uk				733	252	FFFFFFWPPKNQTIFFFFPFFNFFTPGFFWENSKLNFFQKKNFYNFPKKKKKIFFFFFSLRKGNKFLFLKKLFLLYKSALHFIL	4
TI_asb-14	14	2	2	693		66	2	0	2	2	CG8690 - alpha-glucosidase	met/carb	GO	6e-28	33.8	693	609	LSLKGTAITYYGDHLGMPDSIVRMDQAKDPQGKHSSYSDFLWKSRDPERGPFLWNKNKTAGFSSSLKSWIPVSPSYWQNNVKTQNSSDRSHLKIYREMVSLRKNLTLKFGDINVIDVNDNVLAIYRYFDDNPSVVVVINFGSIEEKVNLLQKRESLPSTLYFYLASLNVNDFRDKDKKPELYKSSEITIPPKAALVLTTQQMK	1	ACYPI000002	6E-035	10	gi|239791724	149	200	304	40	66	120	0	107	7	1	1	N	FOR	Acyrthosiphon pisum	Probable maltase L OS=Drosophila melanogaster GN=LvpL PE=2 SV=2	3E-026	10	sp|P07192|MAL3_DROME	118	199	574	34	35	131	0	380
TI_asb-16	16	1	1	537	503	48	0	1	1	-1	NBP2b protein	uc	NR-LIGHT	3e-28	81.1	537	534	DSWLPLLRKSLNTDESVFGSYITGILTGDETLEEKTEALEGILAEITENDISDHCSEILDRWKSCQKSPESETLIRTNPFEDVEEKLVRLLETNTLSTTVHREYTEEERRIREAILAQYSQTSDQESGGEENSCPGEGKENGLVRNTNASAVAQAEKEKREKAKIDSQKKKKKKKKKT	1	similar to NBP2b protein, putative	3E-028	10	gi|189237012	126	168	207	44	81	93	1	10	4	1	1	N	FOR	Tribolium castaneum	Coiled-coil domain-containing protein 43 OS=Gallus gallus GN=CCDC43 PE=2 SV=1	2E-014	10	sp|Q5ZK95|CCD43_CHICK	78.6	153	217	30	71	106	6	16
TI_asb-17	17	1	1	427		26	0	1	1	-1	Ornithine decarboxylase antizyme	met/aa	PFAM	5e-15	39.6	427	225	TICQDLFQPRLASWRKKLVDHITKCSLAQGLCGVPDVPHIQLQNHNKPQETELFEASGRGGSVRITFELKAYRTN	1	Ornithine decarboxylase antizyme, putative	7E-014	10	gi|242005331	78.2	63	135	58	47	26	0	35	236	1	2	N	FOR	Pediculus humanus corporis	Ornithine decarboxylase antizyme 2 OS=Danio rerio GN=oaz2 PE=2 SV=1	3E-009	10	sp|Q9YI97|OAZ2_DANRE	60.5	54	218	51	25	26	0	122
TI_asb-18	18	1	1	1047	678	34	0	1	1	-1	Nuclear protein contains WD40 repeats	uc	KOG	0	1.7	1047	189	GETVAGGGAGGPPLFFAAFYLTPPPPTCALKRGGGWWSAKGADFKSLGDKPPRGFFPRSRPGF	5	hypothetical protein DAPPUDRAFT_302186	2.4	8	gi|321456035	35.8	89	269	32	33	60	0	166	716	1	2	N	FOR	Daphnia pulex	Rho GTPase-activating protein 33 OS=Mus musculus GN=Arhgap33 PE=1 SV=1	0.89	4	sp|Q80YF9|RHG33_MOUSE	35	47	1305	40	4	28	2	963
TI_asb-20	20	1	1	777	760	48	1	0	1	1	Nuclear protein contains WD40 repeats	uc	KOG	0	6.9	777	357	YSIPTYESLTCVRLLASNPQVNLHLPFFFLSIDHHISTESNILVIFFFPLAQLKVGGPVIDEIANNMFHRTNCLCNQRKEKKASDSTTGVSQSTHQTPHTQSLDRYLVSSLANRCPFPF	5	DBF4-type zinc finger-containing protein 2-like	7.2	2	gi|311272939	33.5	74	2441	25	3	55	0	2188	452	1	-3	N	REV	Sus scrofa	Leucyl-tRNA synthetase OS=Chlamydia trachomatis serovar L2b (strain	2.8	10	sp|B0BBI9|SYL_CHLTB	32.7	59	819	25	7	44	0	7
TI_asb-22	22	1	1	475		34	1	0	1	1	steroid reductase Ixodes scapularis	met/lipd	NR-LIGHT	1e-41	44.9	475	450	IINCSGSNTVCTIDITPSSTINDVKTCVHKKKGKLYPDRQALRLEAKSKNLKDEETLQSLGLKNGSRLYLKGLGPQIGWSTVFLAEYAGPLVIYLYVYQRPLIFYGNFGSSAEGSITAHIAAACWKFHYAKGLLETIFVHRFFSFHNGSL	3	similar to GA10597-PA	3E-042	10	gi|156543298	165	142	300	55	47	63	0	5	3	2	3	Y	FOR	Nasonia vitripennis	Trans-2,3-enoyl-CoA reductase OS=Rattus norvegicus GN=Tecr PE=2 SV=1	4E-030	10	sp|Q64232|TECR_RAT	124	135	308	47	44	71	2	17
TI_asb-23	23	1	1	931	886	33	1	0	1	1	hypothetical mucin	uc	NR-LIGHT	5e-54	44.4	931	867	KSKLSARGRELISTSLTTAKARATDFVETSEGLKPIDTVSEEQSGTISPTRTALLESSGTKRGLAPELSKQNSTESLNETKSTLDLPFNKSDLDISSREDSTTSEAPVNKKAKFESMIHFVKAETLLLSGKTKENVSVHAEEESELSEENMKTYIKDNSSLLMDKMKFLSAGKESVSPVQIWAIQLETLLNAWESKYLKASFLKSWLDSTSKELRRLESSGAPPGWLCTWSKYDTHCPHPPLSSKLVSVLFWFGPKKTLKIQKWPKQFTLNFSSKRANLSFIKKKKKNF	1	hypothetical mucin	5E-054	10	gi|307095162	213	128	288	90	44	12	1	161	1	1	1	N	FOR	Triatoma matogrossensis	Formin-binding protein 4 OS=Mus musculus GN=Fnbp4 PE=1 SV=2	5E-007	10	sp|Q6ZQ03|FNBP4_MOUSE	55.5	173	1031	22	17	134	0	459
TI_asb-26	26	1	1	619		37	1	0	1	1	Retrovirus-related Pol polyprotein from transposon opus	te	SWISSP	5e-09	19.6	619	591	NSAITAGEIINKLLNYFTHHGIPETIISDNSTEFNNSLIKEEMALHIIKIHFTSTQHPTSNGMVERVHSTLIEHIRLLKNQPEFKKDTMENKLKYAILAYNNSIHSVTKLTPFEILYGHINPNSPFDIDFNTLLTNDYIHHHKEKTKLLYERIKETNQKIKENIPTKRNINREPLPEFPSDIYVKTMQKQSKTKNKI	2	hypothetical protein TcasGA2_TC002009	5E-042	10	gi|270016691	172	190	797	44	24	106	1	77	23	1	2	N	FOR	Tribolium castaneum	Retrovirus-related Pol polyprotein from transposon opus OS=Drosophila	5E-009	10	sp|Q8I7P9|POL5_DROME	61.2	197	1003	29	20	139	1	803
TI_asb-31	31	1	1	841	817	25	1	0	1	1	Unknown product	uk				841	258	FFFFFFFFCFKNRKILLREFKILSSIPNNWFINILKLAGLILLKLALMSTRRMSDSDCSCLKAEWRLFLKECLLFIVQIPPPCEKG	4
TI_asb-33	33	1	1	254		24	1	0	1	1	Unknown product	uk				254	222	FFFFFPHGTCSLSVSWLYLALDGVYHLLSPPPPPPPTVRRGPPEIGICHQRAWHPLGTVASFKMDLGEMHISQR	5	hypothetical protein Bm1_04940	2E-005	5	gi|170573427	50.1	55	65	54	85	25	0	3	88	1	1	N	FOR	Brugia malayi	Protein TAR1 OS=Saccharomyces cerevisiae GN=TAR1 PE=2 SV=1	2E-004	3	sp|Q8TGM6|TAR1_YEAST	44.7	40	124	57	32	17	0	37
TI_asb-34	34	1	1	912	884	48	1	0	1	1	Unknown product	uk				912	195	TITDYFFPYNDDFETCLNKANLIVANTIEYKWKLYNPIWFFIFRFTGRNGMDSTKCWRQEINMIF	4	hypothetical protein Phum_PHUM236670	1.1	8	gi|242010727	36.6	80	376	27	21	58	0	303	607	1	1	N	FOR	Pediculus humanus corporis	Primosomal protein N' OS=Buchnera aphidicola subsp. Schizaphis graminum GN=priA	6.1	1	sp|Q8KA15|PRIA_BUCAP	32	98	720	28	14	70	7	43
TI_asb-35	35	1	1	623		58	1	0	1	1	Unknown product	uk				623	168	LYRTLKERINYIEPAISIRSLKELETFSRKFPTKNSKSYSVNSHIMVSSISSNLEF	5																			Zinc finger protein 252 OS=Homo sapiens GN=ZNF252 PE=5 SV=2	4.2	2	sp|Q8WUN3|ZN252_HUMAN	31.6	37	682	37	5	23	1	40
TI_asb-38	38	3	3	681		75	0	3	3	-3	Unknown product	uk				681	297	TTLSHSLSSSHALFSHSLKHYADSSSSTSSSSSSSPSPKSSPISSPTKLVIIFLFALNLFFLFVKDFFITFTLSIFFLLLCFLHILSFVLCWPFRSFYF	4	hypothetical protein	1E-005	7	gi|66506802	52.4	43	116	65	37	15	0	1	25	1	1	N	FOR	Apis mellifera
TI_asb-39	39	1	1	993		41	0	1	1	-1	Eukaryotic rRNA processing protein EBP2	uc	PFAM	5e-44	71.5	993	693	IMKDLNINQLSEEELDVETSARIEAILKPPKKKRKRPLIEDSEPEPDTDSETEAIQEAFKKGILKPGLNIPAPEQKPKINNVPLLKKRRKELKTNFDWIERLDVISKQAPLAPELSVQLSETEGTKDTIIHDELKRESIFYRQAQDAVLSVLPKLRELGIKTQRPEDYYAEMAKSDAHMQKVKIHLIKRKTETERKEKVRAMRAQKKLQKAVQAQVKVAKQKLQKRNYGIK	1	CG1542	2E-030	10	gi|21357767	135	150	307	47	49	79	17	23	232	1	1	N	FOR	synthetic construct	Probable rRNA-processing protein EBP2 homolog OS=Drosophila melanogaster	5E-031	10	sp|Q9V9Z9|EBP2_DROME	135	150	307	47	49	79	17	23
TI_asb-40	40	2	2	702		65	2	0	2	2	midasin - ribosomal large subunit assembly - rRNA processing - calcium ion binding - ATPase - ATP binding - nucleus	ps	GO	2e-40	4.8	702	696	AKTPARKNTPFNNDEAKEGQPNKTGDKTGQETSAEVEGDFVETQGVPRGTSSSYHTRQEELDAQFITEAEILSLRINIEQELASWSQPPDSEEAIAAWEKLCSVTSNLAKELSEQLRLVLEPTNASGLKGDFRTGRRINMRKVIPYIASQFRKDKIWLRRTKPSKREYQIILAVDDSSSMADNHSKELAFESLALVSRALNLLEAGDLGVLSFGETIKVLHQLGDPFNEYSG	3	hypothetical protein TcasGA2_TC012900	6E-072	10	gi|270016051	272	235	1457	60	16	93	10	1078	24	1	3	N	FOR	Tribolium castaneum	Midasin OS=Homo sapiens GN=MDN1 PE=1 SV=2	1E-051	10	sp|Q9NU22|MDN1_HUMAN	202	227	5596	49	4	114	8	5233
TI_asb-41	41	3	3	571	391	74	1	2	1	-1	hydrogen-transporting ATP synthase G-subunit Tribolium castaneum	tr	NR-LIGHT	2e-26	95.9	571	336	PIRGNLPMEPKFGPQPKTFSILKWIGPGGPPRFFFFFFFFFWVFFFFFFFFFFFFFFFFFQITLIFINCNLINTRCYTLNLFLTMLILSITPQSCIRLHSSFLYILQYKTSK	5	similar to hydrogen-transporting ATP synthase, G-subunit, putative	2E-026	10	gi|91081869	120	95	99	54	96	43	0	5	9	1	3	N	FOR	Tribolium castaneum	ATP synthase subunit g, mitochondrial OS=Pongo abelii GN=ATP5L PE=3 SV=1	5E-023	10	sp|Q5RFH0|ATP5L_PONAB	107	97	103	53	94	45	0	7
TI_asb-44	44	1	1	952	835	27	1	0	1	1	proteasome subunit beta type 58	prot	NR-LIGHT	1e-51	27	952	381	LTLRSHCECPVPLLGFSXXXXSKMXLPVLLGLNEXFLKXTLHKIDSKEFEVYNFKNEMCLAPPPLANPRSSNVYFTTDQNGREVKIKFDHGTTTLGFVYNNGVVLAVDSRSTGGKYIGSQSMKKLWR	2	similar to proteasome subunit beta type 5,8	1E-051	10	gi|91085931	125	77	279	76	28	18	0	31	158	2	1	Y	FOR	Tribolium castaneum	Proteasome subunit beta type-5 OS=Rattus norvegicus GN=Psmb5 PE=1 SV=3	1E-035	10	sp|P28075|PSB5_RAT	119	77	263	70	29	23	0	51
TI_asb-45	45	1	1	612		55	0	1	1	-1	Unknown product	uk				612	243	KPYFVSLSSILFAFLSTRNSVVYHLVIGDKAWGVCFKSKDTYQTQNRFVSVSIPIPFSQNWSKRTSFSWLINLTVILKGEA	6
TI_asb-47	47	1	1	520		26	1	0	1	1	Insect pheromone/odorant binding protein	s/	SMART	2e-13	97	520	426	SNLYLSYHYMKFFTIIAVVCYLFIATNCLPETEIIKECSEKYGVPSVDANQLVNHIRVAFYQRDKCMIRCFLEAREYYVNDKVDFGKMLESQKKFLSPEQQKIVEKIYKICEDYIIHFTDECEVAYEAYHCTKPKPSYLYPN	3	heme-binding protein	4E-038	10	gi|149689110	159	140	143	55	98	63	7	1	45	1	3	N	FOR	Triatoma infestans	Uncharacterized MFS-type transporter efpA OS=Mycobacterium tuberculosis GN=efpA	2.8	7	sp|O05813|EFPA_MYCTU	31.6	22	530	54	4	10	0	6
TI_asb-48	48	1	1	983		33	1	0	1	1	Corticosteroid 11-beta-dehydrogenase	met/lipd	KOG	4e-17	36.6	983	564	PYCVDNDAGITGIWFPFVSRFLSPIFLPFPIWAEGQSNHTNFKVSAFGGLWAVVHTAGVVVKGRLEVQESCLWDSMFKVSVVGTLRTARALLPLLKVTKGRLITVGLSGECRNGAGVVAYTAARHAVAGASNALGHELAHLGISVVVINTGPITAEHMYHRVKVSRPAHEGKNTFLSFIYRLKKKPLP	1	similar to AGAP004450-PA	7E-018	10	gi|91081053	94	123	322	40	38	73	0	144	238	1	1	N	FOR	Tribolium castaneum	Estradiol 17-beta-dehydrogenase 2 OS=Rattus norvegicus GN=Hsd17b2 PE=2 SV=1	0.002	10	sp|Q62730|DHB2_RAT	43.5	109	381	31	29	75	6	161
TI_asb-50	50	1	1	680	658	50	1	0	1	1	Unknown product	uk				680	675	LSYVSTTLSSSCLFVGVAVGHILTKRDNNAEALIDEFIYETVQDLQKNHGDQITIPDIDEKFEKKVAFFKIRGEFITKDGWLRNLTTLQRMAPSEFIQEGNSIILGITLGLNELEFGFKQYSAEILHIGIHGSMRVSVQKNSLYMHLNMMFDDNGGCKTTLDKVTVKELNGFHADMTGLGRDADFIYSMVASLLANKYHKNIERSLTQRLTPVLGDVLTKKKKKK	2	hypothetical protein	4E-010	10	gi|156544907	67.4	182	1493	23	12	139	0	473	65	3	2	N	FOR	Nasonia vitripennis	Mite allergen Lep d 7 OS=Lepidoglyphus destructor PE=1 SV=1	0.004	10	sp|Q9U1G2|ALL7_LEPDS	42	190	216	20	88	152	2	27
TI_asb-51	51	1	1	978		40	0	1	1	-1	Unknown product	uk				978	276	FPLLRDYISGNDVNTVPLSKNSFVEQHYGIARVEIVEVGEEDSDEYDEEDLGIAMRRDEHINMESIQRIINGVVPPRQEDEAEEEEDEGIDL	3	conserved Plasmodium protein, unknown function	3.6	1	gi|124506213	35	42	1560	45	3	23	7	430	464	1	-3	N	REV	Plasmodium falciparum 3D7	NADH-ubiquinone oxidoreductase chain 5 OS=Trypanosoma brucei brucei GN=ND5 PE=3	8.9	1	sp|P04540|NU5M_TRYBB	31.6	55	590	27	9	40	0	436
TI_asb-52	52	1	1	733		57	1	0	1	1	Unknown product	uk				733	195	SFSVFFILLFGVFNIRNFIRVNNSIHFILLMFLNKTKKINNGIIFTVSVACKNLIIYFLIKLFSH	2																			Alpha-1,2-mannosyltransferase ALG11 OS=Kluyveromyces lactis GN=ALG11 PE=3 SV=1	9.6	1	sp|Q6CLD6|ALG11_KLULA	30.8	65	570	30	11	45	1	361
TI_asb-53	53	1	1	981		27	1	0	1	1	Acetyl-CoA hydrolase	met/energy	KOG	4e-25	20.9	981	300	SRIFRSNSFFMAANVRKPVAEGRADSTPIFLQDIPLLFHKGIIKPDVTLVHVSPPDNHGYCSLGNSVEWVRAGLTIPKKLMAQVNKKDATYLSGMVKKIK	1	CG7920	2E-026	10	gi|21358615	122	84	477	67	18	27	0	114	325	1	1	N	FOR	synthetic construct	4-hydroxybutyrate coenzyme A transferase OS=Clostridium kluyveri (strain ATCC	1E-011	6	sp|P38942|CAT2_CLOK5	70.9	85	429	41	20	50	0	73
TI_asb-58	58	1	1	384	102	16	1	0	1	1	Unknown product	uk				384	141	XPNFXXXXSXXXSXLLPQLXKXXFSPXPLNXXTPXFSQSPPFKTTXN	6	beta-D-galactosidase	1.2	10	gi|307229792	34.3	47	1024	38	5	29	0	6	237	1	3	N	FOR	Escherichia coli TA143	Beta-galactosidase OS=Escherichia coli GN=lacZ PE=3 SV=1	0.25	10	sp|Q8VNN2|BGAL_ECOLX	34.3	47	1029	38	5	29	0	11
TI_asb-61	61	1	1	502		25	1	0	1	1	enhancer of rudimentary Acyrthosiphon pisum	uc	NR-LIGHT	3e-24	41.7	502	294	NLLQMSHTIMLIQPGPKPETRTYSDYESINECVEGVCKIYENIFKPLIQIHHPYLRFSRLFDFFCSIIRPFLRGYPKKEPIPTLHTIKTGLRRRFTFF	1	enhancer of rudimentary	3E-024	10	gi|187173295	77	43	103	79	42	9	0	1	172	2	1	Y	FOR	Acyrthosiphon pisum	Enhancer of rudimentary homolog OS=Taenia solium GN=ERH PE=3 SV=1	2E-014	10	sp|P69100|ERH_TAESO	57	42	102	59	41	17	1	1
TI_asb-63	63	1	1	543		39	1	0	1	1	Cathepsin_D2	pm	CDD	3e-44	38.1	543	540	YRLTLHRPNKGLRSASEFSKALNQWRQQLHKYKTLKVNSKLLKATDYGKVKLFNSMNIEYYGEIFLGNPPQKFSVVIDTGSADLWIPSKHCSFFNLACWIHHKYDHDSSSTYHGTGEEMSISYVTGSMVGQIGQDELRIGGMMVKNQTFAEATDEPGMTFVFSDFDGVMGLGFPVLAEFG	1	cathepsin D (lysosomal aspartyl protease)	1E-036	10	gi|257215794	154	181	240	41	75	105	1	17	4	1	1	N	FOR	Schistosoma japonicum	Cathepsin D OS=Gallus gallus GN=CTSD PE=1 SV=1	1E-035	10	sp|Q05744|CATD_CHICK	149	123	398	52	31	59	0	70
TI_asb-64	64	2	2	670		76	2	0	2	2	RNA-binding protein musashi/mRNA cleavage and polyadenylation factor I complex subunit HRP1	tm	KOG	5e-46	56.9	670	669	PLNCCTCGVCVLCTLLLCHCELFTLLKWVCQAGNDNNPEGEQFRKLFIGGLDYRTTDDSLKSFYEQWGEIVDVVVMKHPQTQKSRGFGFVTYASSSMVDEAMKNRPHKIDGREVDSKRAVPRDESGAATGSNVNVKKMFVGGLKEQTEADLREYFGQFGTIVSINVIMDKQTGKRKGYAFIEYNDYDPVDKALLRKDHAVGGKGVTVKKALAKDAAEKGRGGS	1	similar to heterogeneous nuclear ribonucleoprotein A1	1E-062	10	gi|193688386	241	185	348	64	53	66	1	5	115	1	1	N	FOR	Acyrthosiphon pisum	Heterogeneous nuclear ribonucleoprotein A1, A2/B1 homolog OS=Schistocerca	1E-060	10	sp|P21522|ROA1_SCHAM	233	189	342	59	55	77	1	8
TI_asb-65	65	1	1	405		42	1	0	1	1	Selenophosphate synthetase	st	KOG	1e-35	43.2	405	402	GDTKINAWLMFGGVATSVVKSPDIIRPQNAKVGDGILLTKPLGTHLATTLYRWTADVEKMASVNTVITKSDIETSYNISLNSMIHLNRTAASLMHLFDAHAATDITGYGLIGHAETLVKYQNESVDFVIDKLPI	2	selenophosphate synthetase 1 +E9 variant	7E-033	10	gi|295083339	141	134	324	48	41	69	0	162	2	1	2	N	FOR	Homo sapiens	Selenide, water dikinase 1 OS=Pongo abelii GN=SEPHS1 PE=2 SV=1	1E-033	10	sp|Q5RF87|SPS1_PONAB	141	134	392	48	34	69	0	162
TI_asb-67	67	1	1	548		55	1	0	1	1	RNA helicase	tm	KOG	8e-11	14.6	548	480	KRKGTVLSSKMGRSRSRSKSPRRRHKKKHSHKRSKSRDRSHKHREKSRERSSKTRKRSRSASSSSSTDVSESKNVNSLKKKIFNSGKMDEVERLAELERQRRQREMEQKIVEEETAKRIEVLVNKRVEEELEKRKEEIEAEVLRRIEEAKKEMQREKMLE	1	hypothetical protein AND_11848	0.41	10	gi|312376990	36.6	81	252	30	32	56	0	73	304	1	1	N	FOR	Anopheles darlingi	UPF0430 protein CG31712 OS=Drosophila melanogaster GN=CG31712 PE=1 SV=3	0.64	2	sp|Q9VL63|U430_DROME	33.9	52	290	38	18	32	0	140
TI_asb-71	71	1	1	618		56	1	0	1	1	Cytochrome P450 CYP3/CYP5/CYP6/CYP9 subfamilies	detox/ox	KOG	7e-22	26.8	618	411	IDFTFYHKMELSEITLILFAIAITLFIYSLMKMLACYNYWKNHHISYLKPLPLFGNLLPVFSFKKSIGDFYKEAYHKFPNEKVVGVYETILPVLIVRDPKIVEKILVKDFQYFTDRPPFAEETGLFAYGLFQLRGSA	2	cytochrome P450 Cyp6b29	6E-019	10	gi|163838686	96.3	106	505	44	21	59	0	25	293	1	2	N	FOR	Bombyx mori	Cytochrome P450 6B1 OS=Papilio polyxenes GN=CYP6B1 PE=1 SV=1	3E-015	10	sp|Q04552|CP6B1_PAPPO	82	106	498	40	21	63	0	23
TI_asb-72	72	1	1	733	708	50	0	1	1	-1	Chitin-binding domain type 2	extmat	SMART	1e-06	112	733	588	SVDGECRYSGNPIQPDALVKKAKCVNGETSRVSGRCTEYWKCVRNEWKLMKCPKDTNFQEDACEQKPCPLIPVLNHCSKFMRPEDENTYECQFGYLFDGIERQCVYTAAARCAEGECVDGDKINHPTDCSKYKVCKDGTWETESCSVFFPHFDITLKQCRYWHYTCAYDPADCVTGNLRPNPTDCKAYESCESYTW	3	RE46519p	3E-010	10	gi|39752609	67.8	221	645	23	34	170	22	74	87	5	3	N	FOR	Drosophila melanogaster	Low-density lipoprotein receptor-related protein 4 OS=Rattus norvegicus GN=Lrp4	8E-004	10	sp|Q9QYP1|LRP4_RAT	44.3	175	1905	27	9	127	22	82
TI_asb-75	75	1	1	765		56	1	0	1	1	Synaptobrevin/VAMP-like protein	pe	KOG	9e-30	81	765	369	IRKTDKMEGTTNTGESSGGKVQKNINETQAHVEEVVGIMRVNIEKVLERDQRLSDLDDRAEALNMSALKFEQQAAKLKRKMWWKNVKYWLVIGGIVGVLLLIIIVSTTGGDDNSSSNTGNNQP	1	hypothetical protein DAPPUDRAFT_218600	6E-021	10	gi|321456621	103	66	132	72	50	18	0	30	190	1	1	N	FOR	Daphnia pulex	Synaptobrevin-1 OS=Caenorhabditis elegans GN=snb-1 PE=1 SV=1	4E-019	10	sp|O02495|SYB1_CAEEL	95.1	65	109	67	60	21	0	22
TI_asb-76	76	1	1	595		54	1	0	1	1	1D-myo-inositol-triphosphate 3-kinase A	met/lipd	KOG	2e-55	43.8	595	594	GDERSVYEALAGEPPLRDITPAYFRQVHYGGQTFIELQDLLHGFRDPYMMDVKLGTRTFLESEVQNTTARHDLYLKMVAVDAGAPTESERKVEAVTKLRYMQFREQQSSTCSLGFRIEAMKFRGTPPVTDLKRVKNTDDVSDTMALFLGSHEDVRQRIVARLQEIRNKLDQSHYFKKHEVVGSSILILYDDTKVGAWL	1	similar to Inositol 1,4,5-triphosphate kinase 1 CG4026-PA	2E-082	10	gi|193580075	307	198	420	73	47	53	0	160	1	1	1	N	FOR	Acyrthosiphon pisum	Inositol-trisphosphate 3-kinase C OS=Mus musculus GN=Itpkc PE=2 SV=1	3E-036	10	sp|Q7TS72|IP3KC_MOUSE	151	194	678	43	29	110	4	432
TI_asb-77	77	1	1	874		31	1	0	1	1	Neutral trehalase Carbohydrate transport and metabolism	met/carb	CDD	4e-52	21.6	874	489	RSPCSRCTSMRQRKTLANKMATATKTHLLQPGGLNTTSVKSGQQWDAPNGWAPLQWVATEGLQNYGQKEVAMDISWHFLTNVQHTYDREKKLVEKYDVSTTGTGGGGGEYPLQDGFGWTNGVTLKMLDLICPKEQPCDNVPATRPTVKSATTQPSTKEAQPTP	2	alpha,alpha-trehalase	2E-075	10	gi|301648151	285	147	554	92	27	11	0	405	41	1	2	N	FOR	Escherichia coli MS 146-1	Periplasmic trehalase OS=Escherichia coli (strain SE11) GN=treA PE=3 SV=1	4E-076	10	sp|B6I9Q8|TREA_ECOSE	285	147	565	92	26	11	0	416
TI_asb-78	78	1	1	998		34	0	1	1	-1	Translocon-associated complex TRAP alpha subunit	pe	KOG	4e-56	82.3	998	744	AVDSVKLIYFLLFLTMKYFLLFLLAIPALVFMQNKAVMAAGPEEDDVDDEMVDVEGEETAVTGEDAVEEEETQEKPGGSPDADTTILFTKPAQATGTTLDLPGGVLVEFLVGFKNKGTQDFVLETLDASFRYPMDFNFYIQNFSTLAYERNVKPKQEATLLYSFIPAEAFAGRPFGLSVNLRYRDLSGNQFYESVYYETVNITELEQSLDGETLFLYVFLGAWCCIIINWLEKQLFNGRWENKKRGHQ	2	similar to translocon-associated protein subunit alpha	1E-058	10	gi|91079082	229	215	287	56	75	93	2	1	56	1	2	N	FOR	Tribolium castaneum	Translocon-associated protein subunit alpha OS=Rattus norvegicus GN=Ssr1 PE=2	3E-044	10	sp|Q7TPJ0|SSRA_RAT	179	182	319	49	57	92	0	66
TI_asb-80	80	1	1	334		28	1	0	1	1	Unknown product	uk				334	273	SHSHSFFAIHFLRLPVLPLYESRKVSNGTEATEQDECLRDALTTICRAVESWVENNTALEPMEFQRHLEKLVDYTLGQNKACAAIGNEDEE	3	similar to heat shock protein 70	5.8	4	gi|156542837	32	59	750	30	8	41	0	665	135	1	3	N	FOR	Nasonia vitripennis	Putative pentatricopeptide repeat-containing protein At3g13770, mitochondrial	7.9	4	sp|Q9LIC3|PP227_ARATH	29.3	23	628	47	4	12	0	66
TI_asb-83	83	1	1	494	468	57	1	0	1	1	Unknown product	uk				494	189	VVSALDSHAEVPGSSPMLPLDFFFLGTSTAHCSVMDSVVCSERTLSGGQQCTEKAPGANDHRC	1	hypothetical protein	1.5	10	gi|71400266	34.3	29	342	55	8	13	0	9	1	1	-3	N	REV	Trypanosoma cruzi	Galactosyl transferase CpsE OS=Streptococcus agalactiae serotype V GN=cpsE PE=3	1.9	8	sp|Q9AFI0|CPSE_STRA5	32	43	449	41	10	25	0	63
TI_asb-84	84	4	4	784		78	0	4	4	-4	Unknown product	uk				784	555	VKTMDKITSSDKFKQLRINISTSVRSNNLRCSNNSENHRKKVGLKLTEQCERISGSKAARVSPRRSQETKKYDFNNLQCTFRNKTSSDKIVPPNNNEPTINPGRRQATTVHRENNSYKFDEKKTLMDKNERDSSGFLKPLNPAPRRTVHDPSVNEHLYSTKDQSGFLKPVNPGSNRSPHEHLVTE	3	conserved Plasmodium protein, unknown function	1E-004	10	gi|124511844	49.3	106	2206	28	5	76	0	632	255	1	3	N	FOR	Plasmodium falciparum 3D7	Myosin-G heavy chain OS=Dictyostelium discoideum GN=myoG PE=3 SV=1	0.051	10	sp|Q86AC8|MYOG_DICDI	38.5	164	3446	20	5	131	4	1547
TI_asb-85	85	1	1	642		52	1	0	1	1	Unknown product	uk				642	297	ICYFKFSFLFSTLHKLRDSGFCYYTLLLLKAKTILLTSSSASSSWTLIICITFVFTIINYIAPKSVRNIYLFSFKFFIFLLKIKKNIKKKKSSSIFVCC	4	hypothetical protein TcasGA2_TC005990	2E-006	10	gi|270011899	55.1	48	230	56	21	21	0	180	2	1	2	N	FOR	Tribolium castaneum	Protein transport protein Sec31A OS=Mus musculus GN=Sec31a PE=1 SV=2	1.5	10	sp|Q3UPL0|SC31A_MOUSE	33.1	48	1230	31	4	33	0	1183
TI_asb-86	86	1	1	782	764	39	1	0	1	1	Unknown product	uk				782	765	TVSIVWCSFVTHSLSYNSHPVALLPQNIILYTYNYNTCGGENLFLFIKSLLNFFFFFEETNILKQKKMKPPTPSTPQSRDIFGAEFSGTPSHHRVLKPPGGGSSDIFGTNSAQETNVRRVRNHLASNVFLSDEPSPAATMMNSGNGASAAVAASTTLAKQQSEHVNGDNTDGGHNGEQQAMVNGNSQPVMNGNRTTNNGAPSKNPKNSCSHLADFLLVFGENVLKVTSSSNNCNKHSKKNYSSPPLKKKEKKKKK	1	hypothetical protein	6E-006	10	gi|156549214	45.4	118	144	31	82	81	7	21	295	2	1	Y	FOR	Nasonia vitripennis	Microtubule-associated protein Jupiter OS=Drosophila melanogaster GN=Jupiter	6E-005	10	sp|Q9I7K0|JUPIT_DROME	48.1	51	208	45	25	28	0	21
TI_asb-89	89	4	4	805	771	91	1	3	2	-2	Cytochrome oxidase subunit III	met/energy	KOG	0	96.9	805	279	AHHRLIESNHSQATQALFITVILGLYFTILQGYEYYESRFTIRDSAYGSCFFIATGFHGIHVIIGTTFLAVCLIRHIICHFRRKHHFGFEAAA	1	cytochrome c oxidase subunit III	3E-096	10	gi|11182465	353	253	261	71	97	73	0	5	1	1	1	N	FOR	Triatoma dimidiata	Cytochrome c oxidase subunit 3 OS=Drosophila yakuba GN=mt:CoIII PE=3 SV=1	5E-078	10	sp|P00418|COX3_DROYA	291	253	262	57	97	108	0	6
TI_asb-90	90	2	2	681		72	2	0	2	2	Probable G-protein coupled receptor 158	st	SWISSP	2e-10	8.6	681	675	LNTRKFKLEDLAPLNKSDEVYTNKEWFQFLRERWSTNFDSLEKYYMKIKIRYNETGEHFMKYEHYPNYYRAAKLDDGYWTNPFFDCDGKVKKWIIMYAVPFFGWDNLRNKLEFKGVVAVSMDLLQLDINQCPDKYYVPNAFKNTHKCDKTSYCVPILGRGYDAGGYKCECLQGYEYPFEDSITYYDGQLVEAEFLNLVVDNATRFDMFKCRIAGAPSLQENVILL	3	CG31195	1E-101	10	gi|281362159	370	220	807	75	27	53	1	210	3	2	3	N	FOR	Drosophila melanogaster	Probable G-protein coupled receptor 158 OS=Mus musculus GN=Gpr158 PE=1 SV=2	2E-010	10	sp|Q8C419|GP158_MOUSE	65.9	104	1200	34	9	68	5	265
TI_asb-91	91	1	1	438	404	46	1	0	1	1	hypothetical protein TcasGA2_TC012551	uc	NR-LIGHT	2e-31	3	438	396	GPESRCXPXDTEPLYPGDKWNPDTCTECTCTKNNVNCHRLQCTKESGSICERGFKSVVMVGTEDQCCPQYICVPEPTAGPVCPELQQPECGYGQVMKLEKTASGCQEFICQCKPPSECPPVEKKKKKKKKKP	1	hypothetical protein TcasGA2_TC012551	2E-031	10	gi|270013885	136	119	3944	48	3	61	0	1916	46	4	1	N	FOR	Tribolium castaneum	Hemocytin OS=Bombyx mori PE=2 SV=1	9E-018	10	sp|P98092|HMCT_BOMMO	89	119	3133	36	4	76	5	2284
TI_asb-95	95	1	1	1015		30	0	1	1	-1	Unknown product	uk				1015	309	CFFFLFYLRGYKDFFVFSGGPPPFPQKGAPPKIFFKNPHFFTPFSHLKSPCPFFTQSGVQGKRNFGGNPFPALQAAFRNQKERVVLPLPEESPRRFNHNFSSE	4	unknown protein	0.35	5	gi|15226723	38.5	37	759	45	5	20	0	7	659	1	-1	N	REV	Arabidopsis thaliana
TI_asb-98	98	2	2	640	619	76	0	2	2	-2	hypothetical conserved insect secreted protein	s/	NR-LIGHT	2e-26	80.5	640	411	KWHCLLHHFPALGLLPIETTLANSCEGLTHNATYGQRKQGDGLVFRDHIVKRWKFLRYATADVKYPFRGQIPSNITYIEILDQYQNGNGGCPSIIDGGIGYNYVTIRIKSKFNRGFDFIINIYGRRRRKVQNYPPDK	3	hypothetical conserved insect secreted protein	2E-026	10	gi|307094966	120	112	139	50	81	55	1	21	48	1	3	N	FOR	Triatoma matogrossensis	Putative serine/threonine-protein kinase L670 OS=Acanthamoeba polyphaga	2.0	9	sp|Q5UNT4|YL670_MIMIV	32.7	105	539	32	19	71	16	115
TI_asb-100	100	2	2	739	713	69	1	1	0	0	Unknown product	uk				739	240	LFSVVYFTTNYYRNMLIGTCSRYIVGGKAVQTVYWRAQPKTSNGQTVNRIIKTKKTVLFPASDHPRPNITTSIRQIYNGS	2	similar to Tubulin alpha-6 chain (Alpha-tubulin 6) (Alpha-tubulin isotype	0.001	8	gi|110763493	45.8	58	542	43	11	33	0	472	92	1	2	N	FOR	Apis mellifera	Putative sterigmatocystin biosynthesis protein stcO OS=Emericella nidulans	2.0	1	sp|Q00710|STCO_EMENI	33.1	38	297	42	13	22	2	26
TI_asb-102	102	2	2	556	522	83	1	1	0	0	10 kDa heat shock protein Pediculus humanus corporis	pm	NR-LIGHT	1e-32	76.1	556	255	LRAEAVTKTKGGLFIPEKSQGKVLHGTVVAVGPGARSQNGEIIPPQVKVGDNVLLPEYGGTRVDIEENKEYHLFRETDILAKLEM	2	10 kDa heat shock protein, putative	1E-032	10	gi|242016119	141	83	109	80	76	16	0	27	5	1	2	N	FOR	Pediculus humanus corporis	10 kDa heat shock protein, mitochondrial OS=Schistosoma japonicum GN=SJCHGC01960	3E-022	10	sp|Q5DC69|CH10_SCHJA	104	83	102	61	81	32	0	20
TI_asb-104	104	1	1	641	578	46	1	0	1	1	Unknown product	uk				641	282	KIKNYKQLFCFIKYNTEIDFWNLFFTINIFYIFEKTYIYIYYTYIYFILSLINWDIYLLECNHYFFLLICVIIFYLYNYMNTMVIESFLFYLFV	4																			DNA-directed RNA polymerase subunit beta OS=Carsonella ruddii (strain PV)	2.6	1	sp|Q05FH8|RPOB_CARRP	32.3	55	1267	32	4	37	0	186
TI_asb-105	105	1	1	602		50	1	0	1	1	Syntaxin 13 - cytokinesis after mitosis - cytokinesis after meiosis I - mitosis - male meiosis - female meiosis - vesicle-mediated transport	pe	GO	8e-21	45.4	602	408	NYRAMSQSMGTNQKNYGSTNERVPNVSFSGVQFSPTEMFDLSENVTANIYSINSHSKKFEQALKAIGTQKDSHSFREEMQTNLHSANKVVTQTTKDLYKLSSIVKKGDKRQKLQVEKLTNTFKEAVQMYSKVQKIQ	2	similar to Syntaxin 13 CG11278-PA	3E-027	10	gi|110757625	123	129	281	47	46	68	2	23	194	1	2	N	FOR	Apis mellifera	t-SNARE domain-containing protein 1 OS=Homo sapiens GN=TSNARE1 PE=2 SV=2	2E-008	10	sp|Q96NA8|TSNA1_HUMAN	58.9	124	513	23	24	95	10	235
TI_asb-106	106	1	1	571	554	55	1	0	1	1	Unknown product	uk				571	168	HASFCWFWILIHRQSRAIINTCRMLTSTLCFWFSTYSWFTDENSSFFKNYMKETIK	6	unnamed protein product	2.9	4	gi|194385230	33.9	43	267	37	16	27	0	10	117	1	-3	N	REV	Homo sapiens	GPI mannosyltransferase 4 OS=Ashbya gossypii GN=SMP3 PE=3 SV=2	5.9	2	sp|Q753C1|SMP3_ASHGO	30.8	38	498	39	8	23	2	197
TI_asb-108	108	2	2	588		48	1	1	0	0	Unknown product	uk				588	195	FFFSFIIFMSFIVLFYAFKNSCTKFFQIKEFFIVYNISTFRCFIVSLSSDLFFIYVNNFAVIHLC	6	hypothetical protein, unlikely	0.63	10	gi|261331151	36.2	88	100	31	88	60	0	8	251	1	-3	N	REV	Trypanosoma brucei gambiense DAL972	Maturase K OS=Lathyrus vestitus GN=matK PE=3 SV=1	2.9	6	sp|Q8MCR7|MATK_LATVE	32	53	503	33	11	35	0	208
TI_asb-109	109	1	1	432		21	1	0	1	1	Unknown product	uk				432	252	ATTQAGRGWEVVGVLDIPTKSLNNLRGDFNGKLLLKKIKKVLELFHCLFKVLINAKIASFSKLFTEINNAEIYKSVGAAICPGK	2	LOW QUALITY PROTEIN: GC-rich sequence DNA-binding factor 1-like	7.7	10	gi|311270185	31.6	45	915	33	5	30	0	727	103	1	-1	N	REV	Sus scrofa	GC-rich sequence DNA-binding factor 1 OS=Mus musculus GN=Gcfc1 PE=1 SV=2	1.7	4	sp|P58501|GCFC1_MOUSE	31.6	45	917	33	5	30	0	729
TI_asb-110	110	1	1	597		31	1	0	1	1	Unknown product	uk				597	162	PFSSHTANMFKKTIQIGHRRHWEEGIYMENENYIMKIVIVTSKLNLSTYLLPCL	2	DNA topoisomerase 2-beta	2.5	1	gi|113681126	34.3	37	1618	40	2	22	0	892	15	1	3	N	FOR	Danio rerio	Protein CLEC16A homolog OS=Dictyostelium discoideum GN=DDB_G0289943 PE=3 SV=1	5.0	1	sp|Q54GS1|CL16A_DICDI	31.2	28	1550	46	2	15	0	564
TI_asb-112	112	1	1	787	728	51	0	1	1	-1	NADH dehydrogenase subunits 2 5	met/energy	KOG	7e-14	32.9	787	414	MGAITSYLPFTSPCFCISNMSLCGLPFMSGFYSKDLILEAIMGSGYNFFVFLIFFVSIGLTVSYTFRVIYYVIFYNVNMHVCHGYGEDKIMMKSIIVLALLAISGGRMLGWLIFSVPELFVLPLHLKLMPLVFIFLGG	3	NADH dehydrogenase subunit 5	9E-092	10	gi|11182469	281	190	570	71	33	54	0	329	3	2	3	Y	FOR	Triatoma dimidiata	NADH-ubiquinone oxidoreductase chain 5 OS=Drosophila yakuba GN=mt:ND5 PE=3 SV=1	3E-041	10	sp|P07706|NU5M_DROYA	162	186	573	43	32	105	1	326
TI_asb-113	113	1	1	625		57	1	0	1	1	Mitogen-activated protein kinase	st	KOG	4e-52	36.7	625	429	KVPISKSRWFWFLWPSLVIGLLDVFHGAKGIEDFQHVYLVTHLMGADLNNIVRTQQLTDEHVQFLVYQILRGLKYIHSAGIIHRDLKPSNIAVNADCELKILDFGLARPTENEMTGYVATRWYRAPEVMLNWMHYNQTVDIWS	1	p38 map kinase	2E-064	10	gi|218749850	247	126	356	92	35	10	0	1	143	2	1	Y	FOR	Nasonia vitripennis	Mitogen-activated protein kinase 14 OS=Xenopus laevis GN=mapk14 PE=2 SV=1	1E-059	10	sp|P47812|MK14_XENLA	229	126	361	85	35	18	0	9
TI_asb-115	115	1	1	576		32	1	0	1	1	Nuclear protein contains WD40 repeats	uc	KOG	0	3.7	576	204	TVRRRMVEHQVTEHLKKTVNIYTYLYICIYIIYTHIYCYVHILFNMCVHECIIYTNHILTLITTQYQQ	5	hypothetical protein TGME49_037850	0.46	10	gi|237845441	36.6	49	634	36	8	31	0	461	223	1	1	N	FOR	Toxoplasma gondii ME49	DNA polymerase alpha-binding protein OS=Saccharomyces cerevisiae GN=CTF4 PE=1	2.7	3	sp|Q01454|CTF4_YEAST	32	27	927	40	3	16	0	711
TI_asb-116	116	1	1	538	518	56	1	0	1	1	Nuclear protein contains WD40 repeats	uc	KOG	0	10	538	204	KRPRLSYQAVSDSYFSYNLHTIIFFSSLKYHLLTNLMFNSSSSICNYLTVLLIFFLVPKRIKTIILVQ	1	hypothetical protein CpipJ_CPIJ013540	0.078	6	gi|170056878	38.9	52	172	44	30	29	4	23	346	1	1	N	FOR	Culex quinquefasciatus
TI_asb-117	117	1	1	188	162	37	1	0	1	1	Unknown product	uk				188	111	FFFFFFFFLITATKCMKKFSKIPRFKCFDNCYCMLQS	5
TI_asb-118	118	1	1	959		29	1	0	1	1	Nuclear protein contains WD40 repeats	uc	KOG	0	5.7	959	579	SKLPPTAWQTHSAISIINHLLLCFNVITWVVAFIVIGLCLWLRFDPDVGEWVTILQIHSFYVGLYILIVSSVLICASGFLSCAATVAENQFLLTVNIAMQLLIFILGLAGAAVLMDNSTYKSSIHPVIKTVMLSLINQAPANDEATAALAIVQENMGCCGGSGVDDYINPRRAIPSQCKKPVTGKTFLLGLCR	3	similar to EG:8D8.7	2E-031	10	gi|156552185	139	182	244	36	75	116	0	12	45	1	3	N	FOR	Nasonia vitripennis	CD81 protein OS=Saguinus oedipus GN=CD81 PE=2 SV=1	3E-011	10	sp|Q9N0J9|CD81_SAGOE	69.7	155	236	29	66	109	9	10
TI_asb-121	121	1	1	606		30	0	1	1	-1	nonstructural protein precursor Triatoma virus	vir/	NR-LIGHT	9e-54	9.2	606	399	NQFCKYFSSYYFNFESYMKRLKVLNTTMPNLCENLAKCSKRISGRWSSVNNTVLCQCREDTVILQKNLIPLNLNFDLKEILAQSGDQEVPSNDISINFQQRSDGTYVNFKNQFNGESFSQRIPSTIEGFLFTK	2	nonstructural protein precursor	9E-054	5	gi|20451029	211	166	1795	65	9	58	0	172	2	2	2	Y	FOR	Triatoma virus	Probable basic-leucine zipper transcription factor C OS=Dictyostelium discoideum	1.4	2	sp|Q54WU0|BZPC_DICDI	33.1	106	804	24	13	80	4	186
TI_asb-122	122	1	1	671		21	0	1	1	-1	Unknown product	uk				671	210	KQRSGEGEYRYDGNHFINIEDLVSGYPGTTLMTVEGSCVINDRQYWKARLPALCLCQHYFKLRGIFFGYF	1
TI_asb-123	123	2	2	807	784	43	2	0	2	2	alpha-amylase Aedes aegypti	met/carb	NR-LIGHT	8e-48	33.3	807	465	DLQGILNNVKYLKELGVDAVWLTSIYPTNDVDFGYDITDMKNIYKLLDNGTVFDELVKKLHQEGIKLILDFVPNHTSNKHDWFLKSIGTEKYRNYYVWRAGSKDTITGTIKPPNNWAAAIGGGSAWTYDSFRTEFYLHHFLEEEPDLNYENEDRY	2	similar to sucrase, partial	2E-049	10	gi|193636490	198	175	352	51	50	85	1	32	95	1	2	N	FOR	Acyrthosiphon pisum	Maltase 2 OS=Drosophila virilis GN=Mav2 PE=3 SV=1	5E-046	10	sp|O16099|MAL2_DROVI	184	182	524	47	35	95	1	33
TI_asb-124	124	1	1	617		58	1	0	1	1	Transport protein Sec61 alpha subunit	pe	KOG	1e-68	29	617	432	LERILVGGLCYYLSPPENLGHILEDPIHAVLYIIFMLGSCAFFSKTWIEVSGSSAKDVAKQLKEQQMVMRGHRDNSMIHELNRYILTAAAFGGLCIGALSVLADFMGAIGSGTGILLAATIIYQYFEIFVKEQSEMGGMSTLLF	2	Sec61 alpha 1 subunit	2E-071	10	gi|187177323	270	139	476	95	29	6	0	338	17	1	2	N	FOR	Acyrthosiphon pisum	Protein transport protein Sec61 subunit alpha isoform 2 OS=Pongo abelii	4E-067	10	sp|Q5NVM7|S61A2_PONAB	254	139	476	88	29	16	0	338
TI_asb-125	125	1	1	740		42	0	1	1	-1	15-hydroxyprostaglandin dehydrogenase	met/lipd	KOG	2e-37	54	740	666	SCCLGDRSSASFLNAXXXXXXXEGPLVMIFDVNKTVGEATKKEMAKKHGESHVEFICCDVSNDASFEDLFKETIKKFGKLDLLINNAGICNELQDGWKQTIQIDFIAVVKGTYLGMKYMGKHEGKPGGTVVNIGSMSIFTPFECIPVYSGTKAAVNQFSRSIGTKLHYDRTGVRVITVNPGFTDTAILPSISKYIEKYTEASYLNACKQYITPECGQYGVKG	1	similar to Photoreceptor dehydrogenase CG4899-PB, isoform B	6E-033	10	gi|110759932	143	212	255	35	83	136	2	28	67	1	1	N	FOR	Apis mellifera	15-hydroxyprostaglandin dehydrogenase	1E-028	10	sp|Q8VCC1|PGDH_MOUSE	126	170	269	37	63	107	0	29
TI_asb-126	126	6	6	799		85	2	4	2	-2	NADH dehydrogenase subunit 1	met/energy	KOG	0	83.8	799	792	FIVSYILTLVCILVAVAFTTLMERRVLGYIQLRKGPNKVGYMGLLQPFSDGLKLFFKEQTYPYYSNFIIYYFSPVFMLMLSFSLWVLFPYMMNVYNFSFGVLFFLCCTGMGVYGVLLSGWRSNSNYALLGGLRSVAQTISYEVRIALILICMLVFIFRFNFVDFMKYQEYVWFIFFSFPLFFCWFSSCLAETNRSPFDFAEGESELVSGFNVEYRRGGFAFIFLSEYMNIIFMRLLCCVVFLGCDVYSLMFFFKLTFMVFCFYL	3	NADH dehydrogenase subunit I	1E-131	10	gi|291621799	468	262	307	87	85	33	0	4	3	1	3	N	FOR	Triatoma rubrovaria	NADH-ubiquinone oxidoreductase chain 1 OS=Anopheles quadrimaculatus GN=ND1 PE=3	2E-093	10	sp|P33502|NU1M_ANOQU	342	261	314	61	83	101	0	8
TI_asb-127	127	2	2	718	665	50	1	1	0	0	Unknown product	uk				718	576	HVEYIGLVLPLLFVLCEAQQQDLNKIKVELKELDTKLSDASREIGVIAARKIEGIVQQIKNKCGNDVYESAQVTSKTFLQHLKEINEELLDEILTIEDILKKLENKNIDEQAEEEIVKGFPDYKKSIVDGLTRSKKYIDLQYEELNRMLKTCSASRPADETIPQVGGTTNIPLAPVTLTMAAAFIAIKLAFH	2	virulence factor Mce family protein	0.97	10	gi|302551007	36.2	74	440	36	17	47	3	225	8	1	2	N	FOR	Streptomyces viridochromogenes DSM 40736	Protein NIP100 OS=Saccharomyces cerevisiae GN=NIP100 PE=1 SV=2	1.9	9	sp|P33420|NIP80_YEAST	33.1	56	868	33	6	37	2	113
TI_asb-129	129	7	7	773	747	90	6	1	5	5	Cytochrome P450 CYP3/CYP5/CYP6/CYP9 subfamilies	detox/ox	KOG	2e-76	43	773	627	MTNEQLTGQAFVFLTAGFEATTLSMMFTLYELSKNPDIQEKARGEVQREVKNAGSLSYDAVKGMDYLEQCIKETMRKYPPVPFLFRKCTKDYTLPNGLTVVSGQRVFVSLLSLHYNPTFYPEPEKYKPERFGPDQTRPSCAYLPFGNGPRICIAMRFAMLQMKYCLAKLLINYKFRVSPKTKEPLTFSVKTFFTAPNEKIYFNVSKVNV	2	similar to cytochrome P450 CYP6BK17	1E-050	10	gi|91084707	202	218	496	42	44	126	4	279	8	1	2	N	FOR	Tribolium castaneum	Probable cytochrome P450 6a14 OS=Drosophila melanogaster GN=Cyp6a14 PE=1 SV=2	2E-046	10	sp|Q9V4U7|C6A14_DROME	186	212	509	44	42	117	5	298
TI_asb-132	132	1	1	382		52	0	1	1	-1	Unknown product	uk				382	231	YRRVMATFFGEVILPTSRVFFDDYDDSDNEEEYQVERTLELKLLDEKSLKHEFDLLIIVEGIVCRGFVDLYLINANT	3	odorant receptor 38	0.53	1	gi|299528647	35.4	60	414	36	14	38	0	41	2	1	2	N	FOR	Nasonia vitripennis	Putative CDC123-like protein L884 OS=Acanthamoeba polyphaga mimivirus	8.0	1	sp|Q5UQX4|YL884_MIMIV	29.3	54	323	27	17	39	0	56
TI_asb-139	139	1	1	789		57	1	0	1	1	Translation initiation factor 3 subunit i (eIF-3i)/TGF-beta receptor-interacting protein (TRIP-1)	ps	KOG	2e-83	72.1	789	717	YNYFIKMKPLMLHGHERPITQIKYNREGDLLFSAAKDHCPNVWFSLNGERLGNFIGHNGAVWCLDINWESTKFMSGAADNTLKFWDCSNGVEIGNIETKSTVRTCVFSYSANMAAYSTDTQRRQVCEINVIDCRMSDSFGSEPILCIPIPDSKVTALQWGPLDEKIITGHENGKITQWDMRTGKQLNQVSGHNGSINDMQMSKEGMMFVTASSDHTAKLFDTEQLNNLKTYQTERPVNS	2	ACYPI003750	9E-089	10	gi|239788595	328	234	325	66	72	79	1	1	89	1	2	N	FOR	Acyrthosiphon pisum	Eukaryotic translation initiation factor 3 subunit I OS=Drosophila grimshawi	2E-080	10	sp|B4JB43|EIF3I_DROGR	298	236	326	63	72	87	3	1
TI_asb-140	140	1	1	320	246	35	0	1	1	-1	Unknown product	uk				320	222	CLLDISFLRYFVHKHYSYNILQQSYSYTIYSNLIATLNKIFFLNKKKKKRKKKKKKNFFFFGPPPPKKFWFPGF	1	Envelope glycoprotein gp160; AltName: Full=Env polyprotein; Contains: RecName:	5.9	1	gi|119492	32	34	877	35	4	22	0	788	59	1	2	N	FOR	Simian immunodeficiency virus	Envelope glycoprotein gp160 OS=Simian immunodeficiency virus agm.vervet (isolate	1.2	1	sp|P27977|ENV_SIVVG	32	34	877	35	4	22	0	788
TI_asb-141	141	1	1	585	565	53	1	0	1	1	CG2091-PA isoform 1 partial	uc	NR-LIGHT	1e-19	45.9	585	306	IVQIPSPWEPNDCNEKDAQHLINDLSIFRFVRILADHGQRKTVCVERTLKDREGKAILWLEKLPFSEESVKSLCTNKSLLHREFLNDIYGSYTCKTDPDING	2	similar to CG2091-PA isoform 1, partial	1E-019	10	gi|110767728	98.2	148	322	38	46	91	2	45	101	1	2	N	FOR	Apis mellifera	Scavenger mRNA-decapping enzyme DcpS OS=Homo sapiens GN=DCPS PE=1 SV=2	1E-010	10	sp|Q96C86|DCPS_HUMAN	66.6	155	337	26	46	114	5	47
TI_asb-143	143	1	1	867	579	22	0	1	1	-1	Probable RNA-directed DNA polymerase from transposon BS	te	SWISSP	2e-07	14	867	339	GHPIRSYRFRQSCRNLQAHLNPLESWCKKWKICKFLNVEKYNFHIRRGTLSPATFNKKILPTVKNVRNLGLFKDKKLIWNPHTRLKRKKKKKKKKKKKVRPPRPHSNPRIRER	1	similar to predicted protein, partial	5E-009	10	gi|193688172	64.3	126	540	33	23	84	4	28	205	1	1	N	FOR	Acyrthosiphon pisum	Probable RNA-directed DNA polymerase from transposon BS OS=Drosophila	2E-007	10	sp|Q95SX7|RTBS_DROME	56.6	135	906	30	15	94	15	636
TI_asb-144	144	5	5	685	662	71	2	3	1	-1	Chitin-binding domain type 2	extmat	SMART	9e-12	100	685	201	CEHSSDYDWPNSSNCRYYYHCHNGVATEESCFILFRKFNPVTLHCDWAWKVDCSVSPTKPWEHTKRR	3	peritrophin A, putative	0.005	10	gi|241731250	43.5	75	172	36	44	48	2	11	51	1	3	N	FOR	Ixodes scapularis	Chondroitin proteoglycan-2 OS=Caenorhabditis elegans GN=cpg-2 PE=1 SV=3	6.5	6	sp|P41996|CPG2_CAEEL	31.2	59	524	33	11	39	1	247
TI_asb-145	145	3	3	542	467	78	3	0	3	3	Ribosomal protein L27 CG4759-PA Tribolium castaneum	ps	NR-LIGHT	4e-57	100.7	542	426	FIILFNMGKIMKASKVVLVLNGRYAGRKAVVLKTYDEGTQEKQYGHALIAGIDRYPRKVHKRMSKTKIHKRSKIKPFLKVMNYNHLMPTRYSVPEIIPDQKVAPKDLKDPMKKKRIRFQIRVKFEERYKQGKSKWFFDKLRF	2	similar to Ribosomal protein L27 CG4759-PA	4E-057	10	gi|91092502	222	136	135	77	101	31	0	1	20	1	2	N	FOR	Tribolium castaneum	60S ribosomal protein L27 OS=Danio rerio GN=rpl27 PE=2 SV=3	1E-043	10	sp|Q7ZV82|RL27_DANRE	176	137	136	64	101	48	1	1
TI_asb-146	146	1	1	589	560	51	1	0	1	1	Chitin-binding domain type 2	extmat	SMART	7e-06	98.2	589	489	VAISRNQEALKRINRPSEQLFDSIERQCVSREDARCFEGECVDGDTTSVADDCTKYKLCENAKWVEKSCIWLAHYDVVTKQCKYVGCTCGYRQPTTTLTPPTTIVKKETCYEENEKRSVKGDCKRFQVCKNGEWTDDKCNVWGKFDVDEKQCVYFKTWAVHCA	3	RE46519p	5E-006	10	gi|39752609	53.1	140	645	27	22	102	7	29	63	5	3	N	FOR	Drosophila melanogaster	Peritrophin-48 OS=Lucilia cuprina PE=1 SV=1	0.44	10	sp|P91745|PE48A_LUCCU	34.7	119	375	26	32	88	19	241
TI_asb-147	147	1	1	479	445	39	1	0	1	1	Unknown product	uk				479	159	FAVKLNCVTLFNTYHHQYVGKVSLKNPTHVQENNYIYKKSVLQMQELVMSGAS	6	hypothetical protein TcasGA2_TC015145	5.2	1	gi|270008603	32.3	31	235	48	13	16	0	129	89	1	-2	N	REV	Tribolium castaneum	DNA ligase OS=Flavobacterium psychrophilum (strain JIP02/86 / ATCC 49511)	8.6	1	sp|A6H0N9|DNLJ_FLAPJ	29.6	36	666	41	5	21	0	389
TI_asb-151	151	6	6	712	621	78	1	5	4	-4	salivary secreted protein	s/	NR-LIGHT	2e-41	100	712	393	LIMARGILITVLLVTCLYVTNGWPTKESGNHTIIIGRRRYNDEILFQKTVTKTNWNPWGTVSEDVTYPVKQVPGRIIITEIDAIDLDGNDNGGYGYILKGGTDTDYVTIHFKSQKGRGYKFDLTIFGRIYH	1	salivary secreted protein	2E-041	10	gi|149689094	171	129	129	65	100	44	1	1	151	1	1	N	FOR	Triatoma infestans	Uncharacterized protein C27B12.07 OS=Schizosaccharomyces pombe GN=SPBC27B12.07	1.1	2	sp|O42997|YBC7_SCHPO	33.9	45	290	35	16	29	0	172
TI_asb-152	152	9	9	744		87	0	9	9	-9	NMDA receptor-regulated gene protein 2	st	PFAM	6e-15	65.4	744	600	SFSLETIFSDSLKAKKKKLNYKVVYNLWDFNSSASQNYMSKNCSKDLKVIIRTTIEGQVTEKTEIDKEAVQKQYKLSPKLEYQTEFGAEAATISDVLRDWASVYIRPSATLARVRLDAVTGELIQIQRLTTTELTAECQRLYKFNPKDRLTTVHSILVKISDLPAGTYVLCRKPKNGTFVDLCKSVESGGRTYIQFTSSL	3	hypothetical protein TcasGA2_TC011887	6E-015	10	gi|270013300	83.6	168	455	27	37	121	2	233	198	1	3	N	FOR	Tribolium castaneum	NMDA receptor-regulated protein 2 OS=Homo sapiens GN=NARG2 PE=1 SV=2	1E-007	10	sp|Q659A1|NARG2_HUMAN	57.4	138	982	23	14	105	2	738
TI_asb-153	153	1	1	943	913	31	1	0	1	1	Aquaporin (major intrinsic protein family)	tr	KOG	8e-43	73.1	943	717	NKMGGKAVLGVEEIKSFEDLGKCLLAEFLGTMLLVLIGCGSCIAWGSEVPSVLQIAIAFGFIIASMVQSVGHISGCHINPAVTLGLFIMGRIGLLKSALYIPAQCAGAVAGAALLKYMVPDPLVKTLGATVVNNVITPGQGVAVEAAITAVLLLVGGAVTDPDRTDLANAAPIAIGLAITCCPIFVGPGNGFKYKSCQILGSCRLSNQFWDHPRGNTGVGPPSLGGAGSRGAGYRGLFF	3	Aquaporin AQPAe.a, putative	3E-038	10	gi|242009228	157	176	281	45	63	96	1	41	171	2	3	Y	FOR	Pediculus humanus corporis	Aquaporin AQPcic OS=Cicadella viridis GN=AQP PE=1 SV=1	4E-040	10	sp|Q23808|AQP_CICVR	159	178	255	47	70	93	1	11
TI_asb-156	156	1	1	190		24	1	0	1	1	Unknown product	uk				190	147	EVRVXIXXGMIGGEEXFNLIGVELIGEMXXIVVGSGDVIKLVGGEYEVD	2	short trialysin 1	1E-007	5	gi|149689036	57.8	49	76	63	64	18	0	28	2	1	2	N	FOR	Triatoma infestans
TI_asb-158	158	1	1	280	254	40	1	0	1	1	Unknown product	uk				280	180	PISLWRVLCFAGLRHDCTLTSYLIFNASLTSPPLGWDLIVSHRYFKLINPRGGQMRNTLN	5	hu li tai shao	1E-006	10	gi|270002882	53.9	39	1367	56	3	17	0	1	139	1	1	N	FOR	Tribolium castaneum	Protein hu-li tai shao OS=Drosophila melanogaster GN=hts PE=1 SV=2	9E-004	3	sp|Q02645|HTS_DROME	42.4	35	1156	54	3	16	0	2
TI_asb-160	160	1	1	638		55	1	0	1	1	Spliceosome subunit	tm	KOG	9e-59	50.7	638	525	LGFIILSRMTAHDQIRAMLDQLMGTGRNGENNRYHVKFSDPKVCKSFLLGCCPHEILSSTRMDLGECPKIHDLALRADFEHASKTRDYFYDIDAMEQLQTFIADCDRRTEVAKQRLLETQEELSAEVAEKANVVHEYAEEIGKKLAKAEALGADGFVDESLKLMEEIDELRKKKS	2	similar to splicing factor pTSR1, putative	3E-075	10	gi|91088003	248	162	328	74	49	41	0	1	59	2	2	Y	FOR	Tribolium castaneum	Putative RNA-binding protein Luc7-like 2 OS=Homo sapiens GN=LUC7L2 PE=1 SV=2	2E-062	10	sp|Q9Y383|LC7L2_HUMAN	201	161	392	60	41	64	0	1
TI_asb-162	162	1	1	1006	745	30	1	0	1	1	Nuclear protein contains WD40 repeats	uc	KOG	0	11	1006	375	IFFFNIRSPPFLRGGNFWAKRRASKIWARPQQKKFFPGFQKFRMGGGGAPHKVFFFFFFFFFYFLKNERKLKGGKNSKGKPAGKLKKPNFSHGPNSCSFKTKAPFGIHILPIGNVYPESLQIYHM	4	trancription factor	2.9	3	gi|68065598	35.4	56	815	32	7	38	3	344	75	1	3	N	FOR	Plasmodium berghei	Cytochrome c oxidase subunit 1 OS=Locusta migratoria GN=COI PE=3 SV=2	4.2	1	sp|Q36421|COX1_LOCMI	32.7	35	512	42	7	20	0	445
TI_asb-168	168	4	4	810	787	63	3	1	2	2	rRNA promoter binding protein - rRNA transcription - cell proliferation - transcription factor binding - transcription factor - double-stranded DNA	tf	GO	3e-08	42	810	447	LLNVGREIVSQVDQPAEANGNHTANDSQQGRSVGGQGTGPSSDPKALERNFLLAQARHVDTAPLPDQARHDSVLRANPYPEVTDRICRLPLPTLFYRLEAIDLGDLLRIWVRAGAGFLVALSRIFKVRREDPDTAVTAVLFAFQTLSPC	4	hypothetical protein TcasGA2_TC010626	1E-020	10	gi|270015199	102	124	2571	51	5	60	0	1340	148	2	1	Y	FOR	Tribolium castaneum	Probable dipeptidyl-peptidase 5 OS=Aspergillus terreus (strain NIH 2624 / FGSC	1.3	4	sp|Q0C8V9|DPP5_ASPTN	33.9	103	723	28	14	74	11	236
TI_asb-170	170	1	1	328		54	1	0	1	1	organic anion transporter	tr	NR-LIGHT	6e-18	11.7	328	288	GHYGRVVDLSCVVWGMTCGKTGNCWLYDGQKMRYLLNFTAAGLMVVATLLDIGVLLNVGKLKIYDEEEVEETLPKQDNEPFLSKVEKINKNMIKNN	2	similar to organic anion transporter	6E-018	10	gi|193669381	91.7	74	632	50	12	37	0	559	8	1	2	N	FOR	Acyrthosiphon pisum	Solute carrier organic anion transporter family member 5A1 OS=Homo sapiens	2E-004	10	sp|Q9H2Y9|SO5A1_HUMAN	44.3	45	848	37	5	28	0	704
TI_asb-171	171	1	1	258		27	1	0	1	1	Unknown product	uk				258	111	KKIIQLFNSISYVIYTEIISIKVHTMDWHFSRKMSCN	6	hypothetical protein	9.9	1	gi|156103015	31.2	41	1102	43	4	23	2	1011	60	1	-2	N	REV	Plasmodium vivax
TI_asb-172	172	1	1	504	430	55	0	1	1	-1	Preprotein translocase gamma subunit	tr	KOG	3e-32	100	504	285	LELKSTLPYCGLVPEKVRSLFFISLGNMDQISRVIEPSRQFAKDSLRLVKRCTKPDRKEFQKIAVATAIGFCIMGFIGFFVKLIHIPINNIIVGS	1	similar to Sec61p gamma subunit	4E-020	10	gi|156536879	99.4	68	68	73	100	18	0	1	100	1	1	N	FOR	Nasonia vitripennis	Protein transport protein Sec61 subunit gamma OS=Gryllotalpa orientalis	8E-021	10	sp|Q7Z1B8|S61G1_GRYOR	99.8	68	68	73	100	18	0	1
TI_asb-173	173	1	1	927	875	25	0	1	1	-1	Mitochondrial F1F0-ATP synthase subunit OSCP/ATP5	met/energy	KOG	1e-37	89.5	927	414	LEQSHGCNNSLNIPPPEASSAATKPVKPPVQVFGLDGRYATALYSAASKLKQLDVVEKDLENVQKTLKADATLKEYLHSPVIKRHLKVEALKQMATKIKLTPPSVNLLSLLAENGRINRVDGVISAFSTIMGWKQREI	3	AGAP003599-PA	1E-033	10	gi|118783961	146	179	210	45	85	98	0	17	57	1	3	N	FOR	Anopheles gambiae str. PEST	ATP synthase subunit O, mitochondrial OS=Drosophila melanogaster GN=Oscp PE=2	4E-034	10	sp|Q24439|ATPO_DROME	145	180	209	46	86	97	0	15
TI_asb-175	175	5	5	915	888	70	0	2	2	-2	Juvenile hormone binding protein in insects	s/	SMART	2e-12	67.1	915	750	SRMTGSQIFIKVINTEAMKVYFTIICLLVAAFGIIHSEADNPIDRLVKAVLEAIRKILKKYEPYVVPDMPEQTVQGDDILLKAKFSNVKISKASDFTVDHIENNLLEMWAKFAVTLPTMHVEGDYVTSGLVKGKHVTGQGTFKLDITKLVTGGYVELEVVDFYIQMKTLDIYYTIEDLKFSADGLSVEGLTPEQLRDLFSTSFLKYCQENEKFISSQVSAYVKQQANDIMKGKNLQQLLDWLKKIIHQFF	2	hypothetical protein DAPPUDRAFT_308200	2E-005	10	gi|321461569	52.4	157	450	22	35	121	9	36	113	1	2	N	FOR	Daphnia pulex	Arginyl-tRNA synthetase OS=Mycoplasma hyopneumoniae (strain 7448) GN=argS PE=3	3.6	4	sp|Q4A900|SYR_MYCH7	32.7	61	534	32	11	41	1	164
TI_asb-178	178	1	1	497		47	1	0	1	1	Unknown product	uk				497	468	PENDQQYHKSSHVDFLILLSALVLPPWLKEDVFPRTPVENDAEGLLGPLLTSYFELKNLIEEIKQHQETQEISSLVLAEKIASVPEHCLPTDTPHIKAWDSDACNNLKKSLAKAVTLAQNIGSWAYQAGLKICGKVINLLHCGNIDLVKAIKCIYK	3	chromosome partitioning protein ParB	2.6	10	gi|270265402	33.5	72	385	31	19	49	8	129	93	1	3	N	FOR	Serratia odorifera 4Rx13	50S ribosomal protein L25 OS=Clostridium phytofermentans (strain ATCC 700394 /	1.1	10	sp|A9KSE6|RL25_CLOPH	32.7	77	193	33	40	51	7	94
TI_asb-180	180	1	1	645		46	1	0	1	1	hypothetical protein TcasGA2_TC000274	uc	NR-LIGHT	1e-66	73.8	645	639	SSYSTLSWYDAIPNKRMYESFSVFCPDECIESLDLLATEDVLIDWTQPIYLNFTQCSIVERIEKFYNSIGITEKIAGDIYVQSEPPPEELQLDELQGEDCEVRELIAENAQAIHDLYPANDMEAVEVFEKLITRLPAYGVFSSGQLAAWMVQSYYGAMFSMQTRPEFRGKGYGIHLAQQLTRKVRSRGYIPYVVIRPENDASLSLYNKLGFKK	1	hypothetical protein TcasGA2_TC000274	1E-066	10	gi|270001445	254	223	302	59	74	90	12	54	10	1	1	N	FOR	Tribolium castaneum	Glycine N-acyltransferase-like protein 3 OS=Homo sapiens GN=GLYATL3 PE=2 SV=3	0.003	10	sp|Q5SZD4|GLYL3_HUMAN	42.4	66	288	34	23	43	0	198
TI_asb-181	181	1	1	650		59	1	0	1	1	ESSS subunit of NADH:ubiquinone oxidoreductase	uc	PFAM	2e-28	56.9	650	333	ILFQLKKLCAKLMGKQKNWISYGFSHTDEKEDRIVMHSLMFVGITVVFVFGGFLLAYRPGDLGRDWAQREGYLELRRREQLGLPLVDPNYIPLDQIMLPTDEELGDTEIII	3	similar to mitochondrial NADH:ubiquinone oxidoreductase ESSS subunit, putative	4E-022	10	gi|91090522	103	97	140	51	69	47	0	21	134	2	3	Y	FOR	Tribolium castaneum	NADH dehydrogenase	0.037	10	sp|O09111|NDUBB_MOUSE	38.5	48	151	37	32	30	0	104
TI_asb-182	182	2	2	695		73	2	0	2	2	tubulin polymerization promoting protein	cs	NR-LIGHT	1e-81	100	695	516	HRKMSDNGTQSFSEKFKQFSKFGDTKSDGKQITLSQSDKWMKQAKVIDGKTITSTDTGIYFKKLKCHKVSEADYKKFLEDLAKNKKIDLEEIQKKMSSCGPPGLSSAAAITKTSGATERLTDSSKYTGSHKQRFDETGKGKGIAGRKDLVDQSGYVTGYANKDTYAKEHPPN	2	tubulin polymerization promoting protein	1E-081	10	gi|307095196	305	166	166	91	100	14	0	1	20	1	2	N	FOR	Triatoma matogrossensis	TPPP family protein CG4893 OS=Drosophila melanogaster GN=CG4893 PE=2 SV=1	3E-051	10	sp|Q9VV43|Y4893_DROME	201	147	192	67	77	48	0	48
TI_asb-183	183	2	2	817	784	63	2	0	2	2	cathepsin D	pm	NR-LIGHT	1e-46	24.3	817	429	FWRSGNSNDASFFISFFQRYYIIFRFQCITASIYFENDFRKFWNLFTIHNSNPINEFSTNSFKYRNNIFPGPMINEVPVSAIALQPFTHQFDPVKVLIPSIWNCQCFSSFKGIGTNVSFFTRSSLIPPNVISPPSESLAFLLR	4	cathepsin D	1E-046	10	gi|301030231	107	95	390	51	24	46	2	192	3	2	3	Y	FOR	Triatoma infestans	Lysosomal aspartic protease OS=Aedes aegypti GN=AAEL006169 PE=1 SV=2	3E-033	10	sp|Q03168|ASPP_AEDAE	82.4	93	387	46	24	50	0	191
TI_asb-184	184	2	2	733		77	2	0	2	2	Molecular chaperone (DnaJ superfamily)	pm	KOG	1e-24	33.3	733	438	IMESFTKQLRKHLETIYSVHYHFPVKLLQRKFSFNKNDVSQWYKTLGVPDNSDQDTVRVAYIHLVKRFHPDSKSSEADVNKFQEIERAYRNLQDKFCRERYNNECEGEYGLYYNEKTDDEPIDHTAPQHRQYLSYEGIGSGTPFQR	3	J domain-containing protein C21orf55, putative	1E-031	10	gi|242018813	138	114	367	60	31	45	4	33	402	1	3	N	FOR	Pediculus humanus corporis	DnaJ homolog subfamily C member 28 OS=Homo sapiens GN=DNAJC28 PE=1 SV=2	1E-015	10	sp|Q9NX36|DJC28_HUMAN	83.6	113	388	38	29	70	0	45
TI_asb-185	185	1	1	150	85	12	0	1	1	-1	Unknown product	uk				150	147	KKKKXGRKKGEEGGGEKRREKKKKKEGGKKKKKKKKEGRGRKRGGERGE	1
TI_asb-186	186	1	1	545		21	0	1	1	-1	Unknown product	uk				545	123	LVYGIILFILFLSFNIIGDKVRVNYISFRFCWEFCRFEISY	3
TI_asb-187	187	2	2	745		53	0	2	2	-2	Myosin regulatory light chain EF-Hand protein superfamily	cs	KOG	1e-81	101.1	745	558	LYFLFIIAGRNEMSSRKSAGRRATTKKRAQRATSNVFAMFDQAQIQEFKEAFNMIDQNRDGFVDKEDLHDMLASLGKNPSDEYLEGMMNEAPGPINFTMFLTLFGERLQGTDPEEVIKNAFGCFDEDNTGYINEERLRELLTSMGDRFTDEDVDEMYREAPIKSGMFDYIEFTRILKHGAKDKDEQ	1	myosin regulatory light chain, nonmuscle, putative	2E-079	10	gi|242022448	297	152	174	92	87	11	0	22	136	1	1	N	FOR	Pediculus humanus corporis	Myosin regulatory light chain sqh OS=Drosophila melanogaster GN=sqh PE=1 SV=1	5E-078	10	sp|P40423|SQH_DROME	290	153	174	89	88	16	0	22
TI_asb-188	188	1	1	570	527	58	1	0	1	1	eIF2-interacting protein ABC50 (ABC superfamily)	ps	KOG	2e-12	20.4	570	495	SVLCSYQVKMAEMTKDELRKEITAILKGADLGSTSSKKVRQELETKLEVDLSSRKKEIDEIVMQCIKENEKKGKKPKKNGNKNDDEDEDEKDEDDDEKEDDDEDEEEEEEEVEVKKSKRGAPKKAAKRKASSDESDDASDDKGSDEEYSPIKKKKKKKKKNMSAA	2	similar to ENSANGP00000031364	2E-015	10	gi|156538801	84.3	57	260	70	22	17	0	1	101	1	2	N	FOR	Nasonia vitripennis	Upstream activation factor subunit spp27 OS=Schizosaccharomyces pombe GN=spp27	0.003	7	sp|O74503|UAF30_SCHPO	42	50	233	38	21	31	0	2
TI_asb-189	189	1	1	802		47	1	0	1	1	Alcohol dehydrogenase transcription factor Myb/SANT-like	tf	PFAM	8e-07	61	802	360	FYMDCIRNTAPLSPAIAPLVDRRPQHWSRTKYCCRRQTSYSVLKMSFSVADEEKLINLVAKCAVIYDVSHADYRNNLVKDKVWKIIGKELNKDGEVICSLIKWISLANETYMTKITCLTK	5	similar to CG13204 CG13204-PA	7E-004	10	gi|193598935	47	54	255	46	21	29	0	3	319	1	-2	N	REV	Acyrthosiphon pisum	Dihydrodipicolinate reductase OS=Coxiella burnetii GN=dapB PE=3 SV=2	6.6	5	sp|P24703|DAPB_COXBU	31.6	40	239	47	17	21	0	61
TI_asb-190	190	1	1	841	819	26	1	0	1	1	hemolysin-like secreted salivary protein 1	s/	NR-LIGHT	3e-59	57.8	841	504	MPQHVALXCXXLXXXSPFKEGIDRXXNXMFGGVXDVXXQGIDLSQDNVKLTTQLTSSAVEHGTNLGKMGVAAGTTLTSKGLGGVTDLGKQGLDLVGTIAEVIPGADLLPVRTVTDIGKTGVSVLNNIGQEGIKSASYLGNEVLDKTKNVSKINYWNCGKTYLSWNCNS	3	hemolysin-like secreted salivary protein 1	3E-059	10	gi|149898852	220	144	249	80	58	28	0	9	27	2	3	Y	FOR	Triatoma infestans	Probable transaldolase OS=Bacillus halodurans GN=tal PE=3 SV=1	0.29	10	sp|Q9K6E4|TAL_BACHD	36.2	63	212	34	30	41	0	99
TI_asb-193	193	1	1	565		34	1	0	1	1	Nuclear protein contains WD40 repeats	uc	KOG	0	3	565	204	KKIFFFRKPYYSKLLFEILALFIGFRTGNSLKQGFTKKQIYFFLFYPVRDFKGFYPVFKKALLRKKSP	4	Radical SAM domain protein	8.2	7	gi|313499058	32.3	40	406	37	10	25	0	234	371	1	-1	N	REV	Pseudomonas putida BIRD-1	Taste receptor type 2 member 140 OS=Rattus norvegicus GN=Tas2r140 PE=3 SV=1	7.7	1	sp|Q67ES0|TR140_RAT	30.4	100	312	27	32	73	12	105
TI_asb-194	194	1	1	631		51	0	1	1	-1	Hydroxysteroid dehydrogenase-like protein 2	met/lipd	SWISSP	1e-60	33.8	631	483	ISICLIFLFYVLITLQRIMINTGKLAGRTIFITGASRGIGKAIALKAARDGANIIIAAKTAEPHPKLPGTIYTAAKEVEDAGGKALPCIVDVRDEEQVQGAIENAIKTFGGIDVLINNASAISLTGTLETEMKRYDLMHNINTRGTFLVSKICIPYLKKAK	3	hypothetical protein DAPPUDRAFT_203975	3E-066	10	gi|321455574	253	144	418	82	34	25	0	1	198	1	3	N	FOR	Daphnia pulex	Hydroxysteroid dehydrogenase-like protein 2 OS=Xenopus tropicalis GN=hsdl2 PE=2	1E-060	10	sp|Q66KC4|HSDL2_XENTR	233	141	417	80	34	27	0	4
TI_asb-199	199	1	1	967		33	0	1	1	-1	Unknown product	uk				967	183	KIHFLKEGLKNFKNWVPPPPKPPNLVFQIFLICHQHIFIIFLGPQTFFFFVIKNLFKGWLL	5
TI_asb-200	200	4	4	817	793	80	4	0	4	4	Selenoprotein S	detox/ox	PFAM	1e-07	48.9	817	549	NCCNHSIECSGPLVFNKVKENMSTDFDDNLEESASILVQSSSFLVNYGWYFVGLGIFYLVFKEKINQFLDEWYEKREESKYAAKYHKNPGLARARSEGLEAARQRMQEEVNRKAIEAEIRRKELEEKRRLEKLNKFIDTGGNRLGEASTSKNFKSEYNPLMNDAGGRYKPPKRSCCKKGGGCG	1	hypothetical protein isoform 1	1E-015	10	gi|66536414	86.3	158	167	33	95	105	8	2	73	1	1	N	FOR	Apis mellifera	Selenoprotein S OS=Bos taurus GN=SELS PE=2 SV=2	0.033	8	sp|Q2KI76|SELS_BOVIN	39.3	74	190	35	39	48	0	24
TI_asb-203	203	1	1	596	554	45	1	0	1	1	Unknown product	uk				596	183	CTFVVLLMLFSPPNPGDEFSFRVIKGAFWNSLVKLVQACAIYFYCLSQIFKYYFIKKHLLQ	2																			Protein unc-45 homolog B OS=Homo sapiens GN=UNC45B PE=2 SV=1	5.0	1	sp|Q8IWX7|UN45B_HUMAN	31.2	24	931	50	3	12	0	563
TI_asb-205	205	1	1	583		40	1	0	1	1	Unknown product	uk				583	294	QQLLVHHTPYTSSSIQVRHLHHMTNRFQQFXAAQQMYPHVGVGTAMYSQAASPAGYYASAFTPMQAYYHPLAYTYPQXQLRPTNHDSKLDSMEVQRFD	1	hypothetical protein LOC425772	2.4	2	gi|150247146	34.3	40	505	47	8	21	1	154	157	1	-2	N	REV	Gallus gallus	Structural maintenance of chromosome protein 3 OS=Dictyostelium discoideum	6.2	2	sp|Q552D9|SMC3_DICDI	30.8	60	1437	31	4	41	0	397
TI_asb-206	206	1	1	538		51	0	1	1	-1	hemoglobin alpha adult chain 2 - regulation of sensory perception of pain - protein heterooligomerization - erythrocyte development - negative	ps	GO	2e-57	90.1	538	531	FFLFFFFLPTQALFKDQEVQVQGREEGHGQKASPAEGSLTVLGGQHGAHRGKEFVQRGMHRGGEIGRVVASQGHQQAVAQELEVDGIHTQLVGMQVAQSRQGTGQVIEVACSTGQRIGDLLAVTLDQGRAVAYIKVREVGLGGGEASKHPFQGFIKRFSTMATNLPPGSLVMGLSSP	6	unnamed protein product	1E-067	10	gi|12846939	257	139	142	91	98	12	0	4	3	1	3	N	FOR	Mus musculus	Hemoglobin subunit alpha OS=Mus musculus GN=Hba PE=1 SV=2	1E-066	10	sp|P01942|HBA_MOUSE	251	131	142	95	92	6	0	12
TI_asb-207	207	1	1	375	342	58	0	1	1	-1	Ribosomal protein S21e	ps	PFAM	4e-35	100	375	309	CKIGGVFVIFPPPYHFTYFAMQNDAGAFVDLYCPRKCSASNRIIHAKDHASIQINIAEVDPTTGQATDRSKMYAICGSIRRMGESDDCITRLAKKDGILPKNM	1	similar to ribosomal protein S21e	3E-034	10	gi|91093173	145	82	83	82	99	14	0	1	61	1	1	N	FOR	Tribolium castaneum	40S ribosomal protein S21 OS=Spodoptera frugiperda GN=RpS21 PE=3 SV=1	1E-034	10	sp|Q962Q8|RS21_SPOFR	144	82	83	80	99	16	0	1
TI_asb-209	209	2	2	828	810	65	0	2	2	-2	Cell wall-associated hydrolase	extmat	PFAM	1e-11	49.5	828	279	VSTDRSELTALPSTTPRPVQKSSTDDSGSRHRTPRRVEPCYAKNPDLLYRIYHIVNHNGILSHKARATAVKFGRLLKSHCSEPFDSRDPLLNR	6	hypothetical protein DAPPUDRAFT_120463	8E-032	10	gi|321449953	139	107	192	69	56	33	0	65	1	1	-1	N	REV	Daphnia pulex	Protein FAM198B OS=Homo sapiens GN=FAM198B PE=2 SV=1	5.3	1	sp|Q6UWH4|F198B_HUMAN	32	43	519	34	8	28	0	68
TI_asb-211	211	1	1	705		55	1	0	1	1	Cdk activating kinase (CAK)/RNA polymerase II transcription initiation/nucleotide excision repair factor TFIIH/TFIIK kinase subunit CDK7	nr	KOG	3e-70	67	705	687	NIHPPPRPVEHDLKSLMETTKIKKQAFIPGEVKCLMQQLLRAVAHLHDNWILHRDLKASNLLLSHKGVLKVGDFGLAREYGSPLKPYTPIVVTLWYRAPELLLGAKEYSTPIDMWSVGCIFAELMTMEPLFTGKSEQDQLNKIFKTLGTPNERIWPGYNKLPAVQKMTFAEFPVSTLRSRFKAVPTEVGLNLLNGFLTYNPAARLTAESALSHEYFSEIPLPIDPAMFP	2	AGAP011055-PA	1E-100	10	gi|158285039	367	221	954	78	23	47	0	641	41	1	2	N	FOR	Anopheles gambiae str. PEST	Cell division protein kinase 11B OS=Homo sapiens GN=CDK11B PE=1 SV=3	2E-093	10	sp|P21127|CD11B_HUMAN	341	221	795	73	28	58	0	519
TI_asb-214	214	5	5	545	512	90	3	2	1	1	fatbody protein 3Rev-G1 Bombyx mori	uc	NR-LIGHT	7e-14	85.5	545	405	FVTDIHKRMDIKLVLLLILSISAASWAYPKTECGSEASHDLLQGQRQYGDRLLFTTREKMPKSFLRVKSRDVEWPAKHMQVYEHITRVEVLDQKHDGSGGCAFLANGGVGQSFVKLHLKTQRGGSFDFLINIYGK	2	putative fatbody protein 3Rev-G1	7E-014	10	gi|306518634	79	101	118	41	86	59	0	17	128	1	2	N	FOR	Bombyx mori	Nucleolar protein 12 OS=Yarrowia lipolytica GN=NOP12 PE=3 SV=1	0.83	7	sp|Q6C2Q7|NOP12_YARLI	33.5	52	509	32	10	35	0	288
TI_asb-215	215	2	2	856	838	59	0	2	2	-2	Nuclear protein contains WD40 repeats	uc	KOG	0	5	856	279	LFNCNTFALLFAVFEMSSPEDSPLPFMQTWLSDINLNNRTKLNNLLTFPQLTLLAEVEWDLLITRLQQFKSIGFGPYISIKSCNCGSCYTPRS	5	similar to profilin isoform 3	4E-018	10	gi|193603643	61.6	37	107	70	35	11	0	3	70	2	1	Y	FOR	Acyrthosiphon pisum	Profilin OS=Bombyx mori PE=2 SV=1	4E-012	10	sp|Q68HB4|PROF_BOMMO	72.4	46	126	71	37	13	0	1
TI_asb-216	216	2	2	534	506	61	0	2	2	-2	hypothetical protein	uc	NR-LIGHT	6e-26	100	534	297	RMFNLIINPAVRSLAQRQRYAALAPTAKRLTSYKGAPPPATMDDLPVPCGSWETQYNTNQAKYNMHLAIGVIFTVVTIIAAKASGLIYLNYSPPSLPKE	1	hypothetical protein	6E-026	10	gi|111379887	119	58	58	96	100	2	0	1	190	1	1	N	FOR	Triatoma brasiliensis	Xylose repressor OS=Lactobacillus pentosus GN=xylR PE=3 SV=2	8.8	1	sp|P21940|XYLR_LACPE	30	39	388	33	10	26	0	127
TI_asb-217	217	3	3	586	552	88	0	3	3	-3	Histone H1	nr	KOG	4e-37	80.6	586	540	GPSTAATKKTKGSPKKKVAAKAAKKKVTHPPTSQMVTAAIKDLKERGGSSLQAIKKYISTTYNVDSEKMSLFIRKYIKSAVESGELVQTKGKGAAGSFRLGGSEGSVKSKKTTTKAKPKKPATEKKATATKKKASPVKKKEAAAPPKAKKTKKPPTTPKAPKPKKATPSKKKKKKKKKNM	1	truncated histone H1	2E-035	10	gi|149689210	150	117	197	72	59	32	0	1	10	1	1	N	FOR	Triatoma infestans	Histone H1 OS=Drosophila melanogaster GN=His1 PE=1 SV=1	2E-023	10	sp|P02255|H1_DROME	108	75	256	68	29	24	0	46
TI_asb-218	218	3	3	731	714	62	2	1	1	1	polyprotein	vir/	NR-LIGHT	1e-47	7.9	731	729	EFGHYGRGSLLPSTNSGAFMFGEKYTSQKDILRRYQLLWTGRVSLDKSRMPGDAILQWTAAPQGLNLDINNPNQIWNALRDGATPIILNGYMFYRGGLRYRLVFPADFNENVWVQHHPDMPCDGNLTMKVNNQIHYADRFKNHNYGYYIQSTRVNNIVEFEVPFYQPGLFGLARIPVDSQFKTDLSDFIGLGDVVVGVQSTQIKDLDVQVYYSVADDFSCNVFKGYDPMVLCDEVWQTKKKKK	1	polyprotein	1E-047	10	gi|297578409	191	235	2964	42	8	134	8	903	28	1	1	N	FOR	Slow bee paralysis virus	Furin-like protease 2 OS=Drosophila melanogaster GN=Fur2 PE=1 SV=2	0.87	2	sp|P30432|FUR2_DROME	34.3	42	1679	35	3	27	0	1586
TI_asb-219	219	2	2	490		58	2	0	2	2	Cyclin D-interacting protein GCIP	nr	KOG	8e-28	29.8	490	207	KKEDVDKMVNDLEKQIAKREKYSRRRTHNDDADIDYINDRNMKFNKKLERFYGQYTTEIKQNLERGTAV	3	similar to CCNDBP1 interactor	2E-026	10	gi|48098295	120	69	230	81	30	13	0	162	3	1	3	N	FOR	Apis mellifera	Pre-mRNA-splicing factor syf2 OS=Gecko japonicus GN=syf2 PE=2 SV=1	4E-027	10	sp|Q6DV01|SYF2_GECJA	120	68	249	85	27	10	0	182
TI_asb-220	220	7	7	661	586	72	5	2	3	3	polyprotein Slow bee paralysis virus	vir/	NR-LIGHT	1e-19	3.8	661	450	YKNSYHTIGILVTSAFKDKALAARYDLTEATFLKRGFKTHPFRAGVWLAPIEQQSVEECLNWIHAGFDENEALLEVVRSSLDLAYSLGPEYFKLHLGKIQRGLTDLGLVFRSESWYERDRKIFQTEDISLNNKLNNSFFINTYDYIECKS	1	polyprotein	1E-019	10	gi|296005647	98.6	115	2964	43	4	65	0	2849	25	1	1	N	FOR	Slow bee paralysis virus	Genome polyprotein OS=Rice tungro spherical virus (strain A) PE=1 SV=1	4E-006	10	sp|Q83034|POLG_RTSVA	51.6	79	3473	36	2	50	0	3318
TI_asb-223	223	1	1	925	898	44	1	0	1	1	Unknown product	uk				925	144	TVYNTIYKFVQNIHNLIGTTITFKLNYTKSIYLQFIKEKKNIRNYKLH	5	conserved Plasmodium membrane protein, unknown function	4.4	2	gi|296005062	34.7	90	1405	33	6	60	3	1276	5	1	2	N	FOR	Plasmodium falciparum 3D7
TI_asb-225	225	1	1	1013		36	0	1	1	-1	N-methyl-D-aspartate receptor glutamate-binding subunit	st	KOG	1e-51	78.4	1013	609	CNLTITFAFVASLTGDXXXXXXXXXNPFLGWVXXXXMXVCLIXMXXXGDVRRKAPMNFIFLGLFTLAESFLLGCAVATFRAEEVMLAVGICTVVTLGLTLFAFQTKIDFTMMGGVLFAATLILLIFGIILMFWNGKIATLIYASFGALIFSVYIIYDTQIMLGGNHKHSISPEEYIFAALSLYLDIVNLFMYILTIIATASRD	1	glutamate	5E-059	10	gi|290560657	230	203	315	57	64	87	0	114	1	1	1	N	FOR	Bombyx mori	Glutamate	4E-033	10	sp|Q6P6R0|GRINA_RAT	142	198	348	37	57	123	0	150
TI_asb-227	227	1	1	431		24	1	0	1	1	C-type lysozyme	imm	CDD	7e-32	100.8	431	426	LYNMKAILLLCLPFWGGVTEAKDITRPPLGRELLWQGIPRGDLPNWICLIETVSGRDTAAITGSDFDGVYYYGLIQISDRYWCMHGEPGHGCSAKCEDLLSDDITASVKCALLIKNQQGWNSWYLWRNQCKGQKLPNVDDCF	2	lysozyme 2	4E-071	10	gi|115338587	268	139	139	89	100	15	0	1	11	1	2	N	FOR	Triatoma infestans	Lysozyme c-1 OS=Anopheles gambiae GN=AGAP007347 PE=2 SV=2	1E-027	10	sp|Q17005|LYSC1_ANOGA	121	135	140	41	96	79	0	7
TI_asb-228	228	1	1	319		28	1	0	1	1	Unknown product	uk				319	159	PNIHKKKNKXFIYNKIKKNSKTITXIKLSIIKFPNXILQIYFNXXNIXKYLYF	4
TI_asb-230	230	2	2	634		72	2	0	2	2	Kazal-type inhibitor	s/protinh	NR-LIGHT	9e-90	49.7	634	600	IMRYLLLLGLAAFSAVSAEKKDPPCVCPLIWKPVCGSDGQTYPSECILNCVKYALKKDIKVAYQGICKHVTFAAEEEQEVEGWKDPCECPRALHRVCGSDGNTYSNPCTLNCAKHERKSDLVQVHEGPCSPDEHDFEDPCECDNKFDPVCGTDEVTYRNLCHLECATFTTSPGVEVDYEGECLAETVLLEENHCACPRVL	3	infestin 1-7 precursor	1E-121	10	gi|83637828	434	200	409	98	49	3	0	1	33	4	3	N	FOR	Triatoma infestans	Serine protease inhibitor dipetalogastin (Fragment) OS=Dipetalogaster maximus	1E-059	10	sp|O96790|DPGN_DIPMA	229	180	351	59	51	73	2	14
TI_asb-231	231	7	7	757		78	1	6	5	-5	hypothetical protein	uc	NR-LIGHT	1e-63	91.7	757	441	KSGRMSVASVHPASGGLTNRSQSFSSVSSLDDVPGYFTSDPVLSIEELRLQLNSCFTCGVSWHDEHVSLDCAECGGYSLERPCPLCEGHCSAVWKRDLTMSHACGKARWEGSCALLKPLKKEEETRLVQPTGKNSLLLPDLVRFLKK	3	hypothetical protein	1E-063	10	gi|149898792	244	123	134	92	92	9	0	1	276	1	3	N	FOR	Triatoma infestans	Chaperone protein dnaJ OS=Acidithiobacillus ferrooxidans (strain ATCC 53993)	0.41	10	sp|B5ENA2|DNAJ_ACIF5	35.4	77	375	32	21	52	14	134
TI_asb-232	232	1	1	778	756	39	1	0	1	1	Unknown product	uk				778	366	IIYTIYYKFLLLLTFFFSLIFTIKNNFKLWKVICYFMLLVKIMITAYKKKSSKNWRDKLLRLLYCFFFIIYLFIYFNLISVNNGIFVAHVLFIFIYIICTETHTEYFVTYKYIINDKLSFIL	3
TI_asb-234	234	1	1	556		54	1	0	1	1	eukaryotic translation initiation factor 3 subunit Pediculus humanus corporis	ps	NR-LIGHT	4e-52	61	556	465	MRRIQEPETPIDYVQMDGLAVMKIVKHCHEECSGNLEVAQGALLGLVVDNRLEITNCFPFPKTYDETIDEDTQKTERGFLTLKAYRLTPQAINMYKEGEFSPDAMRSLKVSYENLLTEVPVIIRNSPLTNILMCQLQEMIPPQQGYNFLDLSTSS	1	eukaryotic translation initiation factor 3 subunit, putative	4E-052	10	gi|242021197	206	210	344	51	61	102	55	2	91	1	1	N	FOR	Pediculus humanus corporis	Eukaryotic translation initiation factor 3 subunit H OS=Bombyx mori PE=2 SV=1	7E-051	10	sp|Q9GV27|EIF3H_BOMMO	199	209	337	52	62	100	55	9
TI_asb-239	239	3	3	537	488	94	3	0	3	3	NADH dehydrogenase subunit 6	uc	NR-LIGHT	3e-47	98.6	537	219	STIKKSRIRNEQLISLLKLFNPHNISITILLVSYLFLTIIAVTYVSNVYEGPLRIKSKKKKKKKKKKKKKKNL	2	NADH dehydrogenase subunit 6	3E-047	10	gi|149898874	189	149	151	69	99	45	0	1	35	1	2	N	FOR	Triatoma infestans	NADH-ubiquinone oxidoreductase chain 6 OS=Anopheles gambiae GN=mt:ND6 PE=3 SV=2	2E-016	10	sp|P34856|NU6M_ANOGA	85.5	165	174	30	95	115	6	7
TI_asb-240	240	2	2	489	462	75	2	0	2	2	Unknown product	uk				489	180	FFFFFFFFFSQPIVFISLVEFQRFVHLTCHYQGVHFLHSENNFYIYTYYIYVKLGLQRFY	4	queuine tRNA-ribosyltransferase	0.22	10	gi|82753414	37	93	236	34	39	61	6	144	174	1	3	N	FOR	Plasmodium yoelii yoelii	Serine/threonine-protein phosphatase 4 regulatory subunit 3 OS=Xenopus	0.28	6	sp|Q6DFT3|PP4R3_XENTR	34.7	70	820	35	9	45	1	536
TI_asb-241	241	2	2	916	897	58	2	0	2	2	Chitin-binding domain type 2	extmat	SMART	1e-10	101.7	916	789	CIRQTAFRVKCTTPFWVVISVGFFAYVHCFLDSNGLCTTQEMTCSKNCSAVAYCPGVGAMPFLRGCNPETPYCNQGNCTNSYNPFCNQPYTPLIYCPYTDGTYPDPHDCTRFHICLNGIPYTSHCNRPGLVFSTETLSCVRESDEHQCGKAVCAGNGTWVTYSTDQRYAFYCLNSLPTIVKRCNESYVFNTKTEKCEFKCTKEGLFQDDGPNPASYIECSLLYGRDYLLTKRNCPNDENIRSVFDQKNFKMYSYTISFYYHCK	2	hypothetical protein AaeL_AAEL012646	5E-019	10	gi|157133152	97.4	242	271	31	89	165	12	37	89	1	2	N	FOR	Aedes aegypti	Probable endochitinase OS=Caenorhabditis elegans GN=cht-1 PE=1 SV=1	0.006	10	sp|Q11174|CHIT_CAEEL	42	60	617	40	10	36	0	561
TI_asb-242	242	2	2	509	475	86	0	2	2	-2	inorganic phosphate cotransporter	tr	NR-LIGHT	2e-31	19.5	509	498	SVEVYRVVLGLVLLHPKSIIQSKNRTKTYFIELQNKLMGLHQEELGKADDSTKTRRGWFGTRHVVTIMLFLGMANAYTMRTNMSVAIVAMVNQTALPKNPDVVTDECQNGPVQPTNETVTSAKDGSYIWSTTEQGYILSAFFYGYCVTQIPCGILTKKKKKKKKKN	2	similar to inorganic phosphate cotransporter, putative	2E-031	10	gi|193709300	137	108	553	61	20	42	1	58	155	1	2	N	FOR	Acyrthosiphon pisum	Putative inorganic phosphate cotransporter OS=Drosophila melanogaster GN=Picot	3E-023	10	sp|Q9V7S5|PICO_DROME	107	98	529	57	19	42	1	37
TI_asb-243	243	1	1	403		28	1	0	1	1	Unknown product	uk				403	246	YIIFHLGLPQGRLPAASSRATDLVYGKRKGIAKMRLTFIILLSAVYSCLAGPVYPQQELPKAQKLYITDDMKMAMVKDLQNE	1	similar to chondroitin sulfate proteoglycan 3, partial	4.5	3	gi|198415233	32.3	55	1487	34	4	36	0	1269	205	1	1	N	FOR	Ciona intestinalis
TI_asb-248	248	1	1	875		37	0	1	1	-1	Unknown product	uk				875	201	HLDNRLKHYSSANISSSFKLFIGVTITKAIVNNILFCLYIIYRKKKKHNFVPKQCKLTSTKKLHKHL	6	immunoglobulin heavy chain variable region	8.8	2	gi|247425704	33.5	40	121	37	33	25	1	67	373	1	1	N	FOR	Homo sapiens
TI_asb-249	249	1	1	964	839	28	0	1	1	-1	PPPDE peptidase domain containing 1 - cellular_component - molecular_function - convergent extension involved in gastrulation	pm/protease	GO	5e-47	62.2	964	516	SFSSVPFRHDMFSYRCNFNFPGCLRLSSDSDEYLLAKNMAREPIVLNVYDMYWTNDYTTPIGLGVYHSGVEIYGQEYAYGGHPYPFTGIFCITPRDASELGEQFQFRQSVLIGYTDFTEHDVKRIVEEMGKEFRGDRYHLRHKNCIHFSGKFTKDLFGGEKNSFRGENAGFF	2	similar to CG7222-PA	4E-053	10	gi|110750991	211	145	205	69	71	44	0	8	71	1	2	N	FOR	Apis mellifera	PPPDE peptidase domain-containing protein 1 OS=Danio rerio GN=pppde1 PE=2 SV=1	2E-046	10	sp|Q6DC39|PPDE1_DANRE	186	122	196	64	62	43	0	1
TI_asb-250	250	1	1	1008	610	34	0	1	1	-1	40S ribosomal protein S14	ps	KOG	7e-74	100	1008	465	SFFTLSSRKGKQQQEQVQVLLGPQVREGETVFGVAHIFASFNDTFVHVTDLSGRETIARVTGGMKVKADRDEASPYAAMLAAQDVAEKCKSLGITALHIKLRATGGNKTKTPGPGAQSALRALARSSMKIGRIEDVTPIPSDSTRRKGGRRGRRL	1	40S ribosomal protein S14, putative	2E-053	10	gi|242012371	211	168	179	69	94	52	0	3	46	1	1	N	FOR	Pediculus humanus corporis	40S ribosomal protein S14 OS=Drosophila melanogaster GN=RpS14a PE=1 SV=1	3E-051	10	sp|P14130|RS14_DROME	202	140	151	75	93	34	0	1
TI_asb-254	254	1	1	397		25	1	0	1	1	Mitochondrial import inner membrane translocase subunit TIM9	tr	KOG	4e-20	91.5	397	261	KLLPIDPQLRQLKDFMEVYNRIAETCFNHCITSFADRKTSDEEAACADRCVMKYVGLNHQLMQVYVELQPEIVQRKIYEMSKLQEAV	1	hypothetical protein	2E-015	10	gi|156546986	83.6	80	96	42	83	46	0	3	85	1	1	N	FOR	Nasonia vitripennis	Mitochondrial import inner membrane translocase subunit Tim9 B OS=Danio rerio	7E-014	10	sp|Q568N4|TIM9B_DANRE	75.9	78	202	44	39	43	2	1
TI_asb-256	256	1	1	740		52	0	1	1	-1	Serine protease inhibitor dipetalogastin (Fragment)	s/protinh	SWISSP	0	62.3	740	708	SGLLKANRLAETVLLGENDCACPRVLHRVCGSDGNTYSNPCTLDCAKHEGKPDLVQVHEGPCDPNDHDFEDPCECDNKFEPVCGTDEVTYSNLCHLECAAFTTSPGVEVKYEGECHAKIMEQHQILKSCICTKIYSPVCGTDGHTYSNLCVLKCRISSKPGLKLAHVGKCGIGLQAVETKEVRNPCACFRNYVPVCGSDGKTYGNPCMLNCAAQTKVPGLKLVHKGRCQRSDVEQF	2	infestin 1-7 precursor	1E-136	10	gi|83637828	485	228	409	96	56	9	0	14	38	4	2	N	FOR	Triatoma infestans	Serine protease inhibitor dipetalogastin (Fragment) OS=Dipetalogaster maximus	1E-100	10	sp|O96790|DPGN_DIPMA	366	219	351	73	62	58	0	12
TI_asb-259	259	1	1	1006		36	0	1	1	-1	RE17222p	uc	NR-LIGHT	8e-19	75.6	1006	375	SLIFVLTFDQCATYNFQFYFEKITLIMGSLDMAVLTGFICRICSKMNKVVTHVYGEEGKKINLANQLQNYLGVDIFFNNDLPKTVCNSCIVKLKMHYEWMEIIKNAQTRIKNKRLKNQMERDRPA	2	similar to RE17222p	8E-019	10	gi|156543290	97.1	87	115	48	76	45	0	1	371	1	2	N	FOR	Nasonia vitripennis	Phosphate acyltransferase OS=Aliivibrio salmonicida (strain LFI1238) GN=plsX	0.38	7	sp|B6EIZ7|PLSX_ALISL	36.2	68	341	27	20	49	0	203
TI_asb-260	260	1	1	174		24	1	0	1	1	Unknown product	uk				174	171	GALHEKXMMXXNWMKLSDMPGKQEILFMSSMNQNIIIPTKSQIFLIFVLKVKISNCD	2	variola B22R gene family protein	5.9	1	gi|9634768	32	30	1802	43	2	17	0	927	56	1	2	N	FOR	Fowlpox virus	30S ribosomal protein S2 OS=Solibacter usitatus (strain Ellin6076) GN=rpsB PE=3	7.9	1	sp|Q02AL1|RS2_SOLUE	29.3	53	303	28	17	38	0	141
TI_asb-261	261	4	4	688		79	0	4	4	-4	Cytochrome c oxidase subunit I	met/energy	KOG	9e-55	82.9	688	288	SEKMARSTDAPLWATLLDRGGYTVQPVPAPLSTKLLIRSKVRAGGSNQNLILFIRGNAISGAPIIKGTSQLPKPPIITGITMKKIIIKAWAVTITL	5	cytochrome c oxidase subunit I	2E-081	10	gi|307095174	304	226	356	72	63	63	0	4	8	1	2	N	FOR	Triatoma matogrossensis	Cytochrome c oxidase subunit 1 OS=Choristoneura biennis GN=COI PE=3 SV=2	1E-074	10	sp|P50668|COX1_CHOBI	279	226	513	65	44	78	0	9
TI_asb-262	262	4	4	706		79	3	1	2	2	Unknown product	uk				706	645	IDQYKMFYLIIMASLLVSTPLSGADQAEDRTSKIRAVNDLHMWIATYINMNYVLFNDPTSFISSIDLSELHLVSNQTDVKVSLTELSMPVNLLLESTTNDVRNMCSTFKISQPIEVSGQYSATGKLDGQTISSSGAFRMNIKKMVLTGRIYVMPIDTTAKLIEDMFGLKKFDLLEHHQAIRPNFQNIPAMLKNSFNKLIELEVSKLIKHGIKMFN	2	hypothetical protein	0.11	10	gi|68063775	39.3	124	581	27	21	90	5	58	329	1	2	N	FOR	Plasmodium berghei	PAB-dependent poly(A)-specific ribonuclease subunit PAN2 OS=Candida albicans	0.13	9	sp|Q5APK0|PAN2_CANAL	37	79	1190	25	7	59	0	346
TI_asb-263	263	2	2	681	659	66	1	1	0	0	Nuclear protein contains WD40 repeats	uc	KOG	0	10	681	348	WKGGDKEESIKPHDDSKILRIIDVPKKPCPENMKRDIFGRCRPAANFETKPEQKQEKRETKEEQETENDDQKKQDEQEPIIPKNDSNVLNVITLPIKLYPENQEKDVLEKYRPAFN	2	Sec14 domain containing protein	1.9	2	gi|86171620	35	53	1159	39	5	32	0	581	463	1	1	N	FOR	Plasmodium falciparum 3D7	TGB1 helicase OS=Potato virus S (strain Peruvian) GN=ORF2 PE=3 SV=1	6.5	1	sp|P16650|TGB1_PVSP	31.2	66	227	28	29	47	7	153
TI_asb-264	264	2	2	662		69	1	1	0	0	Unknown product	uk				662	525	FGEMCCQQGFDANPSMNNMAKSFLNGGLKEHISGYKYSRLQQTPKYLRLAVVLTIMAVITTFYLLGDLTTDGYLSIIRHMEGFDADDRSVFFTYLNSSMAGRPPGGYIVWSPSCRIPDVPILHDSIRKFVYSVKPVHCNNTPHLTSVKKENGSHILRVHKDIAVKYYKDAMPKCC	3	conserved hypothetical protein	7E-005	10	gi|170028035	49.7	79	626	32	13	53	4	16	438	1	3	N	FOR	Culex quinquefasciatus	Poly(ADP-ribose) glycohydrolase ARH3 OS=Gallus gallus GN=ADPRHL2 PE=2 SV=1	0.72	3	sp|Q5ZI51|ARHL2_CHICK	34.3	99	367	27	27	72	14	135
TI_asb-265	265	13	13	930	850	77	1	12	11	-11	PRK12678 transcription termination factor Rho; Provisional	tm	PRK	1e-11	25.8	930	618	RGFRQWYLRSGPPRQGGNRGSQSGSAHPNNADGAEGNEGGAGSAESKPRRYRNRRFVSRGGGGGYFQRRNNQAAKNGDKAGGKQTDGGEGGGGDEENEGSVGPENRSRGDGGNRRYALNYQGNRSHVFSNKQPRLRGGNHQGRQGGEQGGNKDGDVGGEGGSEQRGGGRGPRGGRGGRIRPRYRRPQYNKEAPQQAVVNTTDESTA	3	predicted RNA-binding protein	3E-034	1	gi|149898790	148	133	300	57	44	56	0	140	3	1	3	N	FOR	Triatoma infestans	Ribonuclease S-4 OS=Antirrhinum hispanicum GN=S4 PE=2 SV=1	8.3	1	sp|Q38717|RNS4_ANTHI	31.6	22	233	50	9	11	0	122
TI_asb-267	267	1	1	487		42	1	0	1	1	Unknown product	uk				487	225	EHYFSRVKFFHLICQVSCLNTGHRRLDFFSYFRVESITKQNKNKEVRGYNFDVYVIFFCLTFIINLYTLHLPYRI	2	hypothetical protein	1.9	7	gi|83317395	33.9	90	832	32	11	61	6	190	20	1	-1	N	REV	Plasmodium yoelii yoelii	Baseplate structural protein Gp28 OS=Enterobacteria phage T4 GN=28 PE=4 SV=4	5.4	1	sp|P13336|VG28_BPT4	30.4	48	177	29	27	34	0	46
TI_asb-268	268	1	1	426		41	1	0	1	1	truncated histone H1	nr	NR-LIGHT	1e-31	37	426	420	GNRQSLLRIAMTETTEQPAAESPAPVAPAKKGKGSPKKKAATKSGAKKATHPPTSQMVTAAIKDLKERGGSSLQAIKKYISTTYHVDAEKMSFFIRKYIRSAVESGELVQTKGEGAAGSFRLGGGTEGSTKKSESTTKTK	3	truncated histone H1	1E-031	10	gi|149689210	137	73	197	94	37	4	0	39	150	1	3	N	FOR	Triatoma infestans	Histone H1 OS=Drosophila melanogaster GN=His1 PE=1 SV=1	1E-022	10	sp|P02255|H1_DROME	105	73	256	67	29	24	0	45
TI_asb-271	271	1	1	477		36	1	0	1	1	40S ribosomal protein S4	ps	KOG	2e-66	52.8	477	459	GGTYSCGSLSVLVLNMARGPKRHLKRLNAPKSWMLNKLGGVFAPRPSTGPHKLRECLPLVIFLRNRLKYALTNVEVTKIVMQRLIKVDGKVRTDPNYPAGFMDVITIEKTGEFFRLIYDVKGRYAIHRITADEAQYKLCKVKKVQTGPRGIPF	3	similar to ribosomal protein S4e	2E-070	10	gi|91083095	266	139	261	91	53	12	0	1	60	1	3	N	FOR	Tribolium castaneum	40S ribosomal protein S4 OS=Carabus granulatus GN=RpS4 PE=2 SV=1	2E-070	10	sp|Q4GXU6|RS4_CARGR	264	139	261	90	53	13	0	1
TI_asb-272	272	2	2	561	254	61	0	2	2	-2	Presenilin	pe	SMART	2e-07	24	561	453	KRPPVFFKKTLMGDLSQISPNKTNPKNFFKLKILRGGGAPKFFFFFFFFFFFFFYFFFFFFFFFFFFFFFFFFFFFFFFFFFFFFFFFFFFFFKDHFDVFIRISKLLKELQGDIYNKLQWKIFCIIVLYCLYLHILHEKSGKIYTYKSYIK	6	conserved Plasmodium protein, unknown function	1.6	4	gi|124513530	34.7	61	592	27	10	44	1	467	38	1	-3	N	REV	Plasmodium falciparum 3D7	Putative peptide zinc metalloprotease protein yydH OS=Bacillus subtilis GN=yydH	3.4	2	sp|Q45594|YYDH_BACSU	31.6	61	252	36	24	39	0	72
TI_asb-276	276	5	5	875	843	71	0	5	5	-5	Unknown product	uk				875	288	FPFQFSDFPKLLCYAILFHLSELSELLFPVSLDQFSDFPKLLYTVILFQLSDFLKLLFPVILFQLSDLPEYLSPVILPSLVLIQLSSFPRTRLFGF	6	protein phosphatase	0.042	7	gi|221056438	41.2	114	977	24	12	86	5	222	503	3	2	N	FOR	Plasmodium knowlesi strain H	DNA-dependent protein kinase catalytic subunit OS=Gallus gallus GN=PRKDC PE=2	0.23	1	sp|Q8QGX4|PRKDC_CHICK	36.6	44	4134	47	1	23	0	400
TI_asb-277	277	1	1	711		55	1	0	1	1	Unknown product	uk				711	183	DFMLHSRLVFVGSDRYLILLIHRQSVVLFNTKFFYGESSRTCKFLLHTTILDLISVIGDKN	2																			Uncharacterized MFS-type transporter yitZ OS=Bacillus subtilis GN=yitZ PE=3 SV=2	5.4	2	sp|P70952|YITZ_BACSU	31.6	52	164	34	32	34	1	22
TI_asb-278	278	1	1	566	544	24	1	0	1	1	UDP-glucose glycoprotein:glucosyltransferase	met/carb	NR-LIGHT	2e-34	11.6	566	561	TPAQISLFPPRRSLHVYSPRVEMPLQIAKEKGIKCPVAVEIGGNIECTLEQLERRLQSDEQFNETDILRLDHKYQKGDKGPVVILYGEIGTPEFTEFHNFLKNKAEKGMLRYILRHWVKERVPKKLRLSGYGVELQMKSTEYKAQDDTKVEGTHTENSERKEDEEVEGFLFSKLKPPLSRPKKKKKK	2	hypothetical protein TcasGA2_TC013545	2E-034	10	gi|270007094	147	175	1599	44	11	98	4	185	2	1	2	N	FOR	Tribolium castaneum	UDP-glucose:glycoprotein glucosyltransferase 2 OS=Homo sapiens GN=UGGT2 PE=1	1E-024	10	sp|Q9NYU1|UGGG2_HUMAN	112	163	1516	39	11	99	4	111
TI_asb-279	279	1	1	186	154	25	1	0	1	1	Unknown product	uk				186	174	TCFFFFFFFFFLKNGSNDFLQTWYMKYAYKDLPLLFEMSLWKFHLRAVMWVGRSYVVL	4
TI_asb-280	280	1	1	509		33	1	0	1	1	S-phase kinase-associated protein Bombyx mori	st	NR-LIGHT	2e-44	46.9	509	336	YHYQTSIQLFLKKLSSGQPITKTNPPPPEDDENKEKRTDDISSWDADFLKVDQGTLFELILAANYLDIKGLLDVTCKTAANTIKGKTPEEIRKTFNIKNDFSAAEEEQVRKE	1	similar to skpA CG16983-PA, isoform A isoform 1	2E-044	10	gi|66504030	148	76	162	96	47	3	0	11	68	3	1	Y	FOR	Apis mellifera	S-phase kinase-associated protein 1 OS=Rattus norvegicus GN=Skp1 PE=2 SV=3	5E-040	10	sp|Q6PEC4|SKP1_RAT	134	76	163	86	47	10	0	11
TI_asb-283	283	3	3	994	961	51	0	3	3	-3	Unknown product	uk				994	696	CVHRSAKMKLLIPLVVIVGAAHAIVTESDKGEMISNLEKSINRLENLENEVRGGLNKTISYMRHHTEEKCGDRDAKCFMKLLKPFEDDISLCIEECIGGYIRTSRTLINKLMSGEYNEEELEHTKHMLSKEGTYYEQMHNSINFTMNNIHQQTITFENNVKGKGNDVNDKAQNSDKVIMQMEKLENQINSELHATSYSLSQQANFLNGDYKKCYQELLTPYLNTVNSATKSN	3	cyln2 (cytoplasmic linker protein-115) (clip-115)	0.008	10	gi|256081884	43.9	172	1086	24	16	130	9	573	84	1	3	N	FOR	Schistosoma mansoni	Uncharacterized protein PFL1135c OS=Plasmodium falciparum (isolate 3D7)	0.075	10	sp|Q8I5I1|YL135_PLAF7	38.5	135	1560	24	9	102	0	248
TI_asb-284	284	1	1	511		40	1	0	1	1	Branched chain alpha-keto acid dehydrogenase E1 beta subunit	met/energy	KOG	2e-36	20.7	511	276	NGSKICGNGVSNPVTLCTGASRLRKHSSWIEAAISAPSPPVRGASWATRSLPVFRTDRSGGILKAAQVFEAVKGIGLNISRIFLSFFFSLAR	6	hypothetical protein DAPPUDRAFT_300984	4E-033	10	gi|321458268	142	75	366	81	20	14	0	292	286	1	1	N	FOR	Daphnia pulex	2-oxoisovalerate dehydrogenase subunit beta, mitochondrial OS=Bos taurus	1E-030	10	sp|P21839|ODBB_BOVIN	132	75	392	73	19	20	0	318
TI_asb-286	286	1	1	425		28	0	1	1	-1	Unknown product	uk				425	114	LINNFYTLNNTTTLPLLISPNIYKYNKKIHPXTKXTSK	4	hypothetical protein D2085.4	0.54	1	gi|17532705	35.4	67	1001	35	7	43	1	185	190	1	-3	N	REV	Caenorhabditis elegans
TI_asb-287	287	2	2	718		79	0	2	2	-2	Unknown product	uk				718	216	YFEFYNYFFFCFSVFKEQINESTKNDYDYGGDRSVKILLYLLQYSISCNFLDFFLRPPMLVFFIFYLNYIQM	5																			DNA-directed RNA polymerase subunit beta'' OS=Plasmodium falciparum GN=rpoC2	5.4	2	sp|Q25802|RPOC2_PLAFA	31.6	121	960	27	13	88	25	385
TI_asb-288	288	2	2	822		59	1	1	0	0	Unknown product	uk				822	630	PQYPENDQQYQSTMMPFFLILLSALVLAQGLKEEEFIPRTPVENDAEALLGPLLKEYFEFQNLIEEIRQHQETQQISSLVLAEQIASVPEHCLPTDMPDIKPLDSDACNNLKKSLAKAVSLAQNIGSWAYQAGLKICGKIISFHHCANINPFTSLKCVLNHIKDLKETIQGYKPDVLNFKEEIVALAKELKLEFNECVKNRRKLKLQLKR	1	cellular myosin heavy chain	0.065	7	gi|256082567	40.4	133	542	21	25	105	1	204	193	1	1	N	FOR	Schistosoma mansoni	GRIP and coiled-coil domain-containing protein PFC0235w OS=Plasmodium falciparum	0.62	10	sp|O97237|YGCC1_PLAF7	35	54	1139	33	5	36	0	778
TI_asb-289	289	6	6	1004	722	56	1	5	4	-4	Serpentine type 7TM GPCR chemoreceptor Srz	st	PFAM	3e-10	64.2	1004	177	GGGGGGPPHTLFFFFFFFFFFLFFFFFFFFFYFFPPNKKNFFLIYCGPIFFKEKKKNFF	6	hypothetical protein HMPREF9422_1833	8.5	1	gi|322386844	33.9	44	84	43	52	25	0	26	445	1	-3	N	REV	Streptococcus cristatus ATCC 51100
TI_asb-290	290	2	2	724		72	2	0	2	2	SNARE protein GS28	pe	KOG	2e-31	67.9	724	486	IILKRDIMSSTSYEDLRKQARRIENEIDLNLISFCKLCAGKHEFHNKGDDSLTEPLLASERGRNVEAASLEIEALLQQLKAVNEQMSDIPPSTTGFAQHTLQRHREILADYTSEFNKTLENYRARKNKEDLMNSVRTEKNYKPGTSSGLNRRMDLYLKENEH	3	similar to predicted protein	4E-030	10	gi|221127344	133	163	250	47	65	85	6	14	252	1	3	N	FOR	Hydra magnipapillata	Golgi SNAP receptor complex member 1 OS=Pongo abelii GN=GOSR1 PE=2 SV=1	3E-029	10	sp|Q5RBL6|GOSR1_PONAB	128	165	248	46	67	89	10	5
TI_asb-291	291	1	1	800		31	0	1	1	-1	ENSANGP00000001286	uc	NR-LIGHT	1e-62	21.3	800	501	ASQGSSFQSRRRGDHICRTNLLQVLRMTHLQTTHQLEVAQEEIKNLSMIIEQNHNSCQSSLDEITAKKEQLTQKEEMLACLQDELFKVRLREAENDALIRDLRAKIQDLEQDKKTLRESTVDNSVAHLQEELIAVKLREAEANLSLKDLRQKVTDLSAQWQSYLKET	2	similar to ENSANGP00000001286	1E-062	10	gi|156554871	218	169	790	68	21	54	1	420	36	3	2	Y	FOR	Nasonia vitripennis	TBC1 domain family member CG11727 OS=Drosophila melanogaster GN=CG11727 PE=1	2E-047	10	sp|Q9VYY9|Y1727_DROME	165	155	807	56	19	68	6	396
TI_asb-292	292	1	1	768	744	41	0	1	1	-1	Vacuolar sorting protein VPS28	pe	KOG	1e-80	94.3	768	603	PYKGFRNAREREKYDPLADLFAVINTLQHVEKAYIRDCVTAHQYTAACSKLLVQYKAAFKQVQSSELPNIDAFVTNYRLDCPAAMERIKEDRPITIKDDKGKTSKCIADIVSLFITLMDKLRLEIRAMDELHPDLRDLAETMSRLSLIPADFEGRTKVNEWLATLDAMHASDELSDQQVRQPIFDLESAYNAFNKLLHNSS	2	similar to VPS28 protein homolog	5E-086	10	gi|66506589	319	199	213	77	93	44	0	15	41	1	2	N	FOR	Apis mellifera	Vacuolar protein sorting-associated protein 28 homolog OS=Rattus norvegicus	2E-078	10	sp|B5DEN9|VPS28_RAT	292	197	228	71	86	57	0	32
TI_asb-293	293	1	1	800	779	50	0	1	1	-1	U4/U6-associated splicing factor PRP4	tm	KOG	2e-11	25.2	800	498	RGPESDRDRDRDLCRRDDDRIGFSRRVCDREDGFRRGERDDFMRRGGDRDDSFRRSERDREFGRGFEKRPEPQGQGSWRRGPESELPEPISKRGIDDRRAVDDKRSMDDRRAVDDKRGIDDRRRMDDRRGIDDKKEWRRTDAPLQKAVDKGEDSGDDGNWERVQRR	2	eukaryotic translation initiation factor 3, subunit 10 theta, 150/170kDa isoform	0.18	10	gi|119924055	38.9	70	1376	31	5	48	0	1239	215	1	2	N	FOR	Bos taurus	Eukaryotic translation initiation factor 3 subunit A OS=Mus musculus GN=Eif3a	0.35	8	sp|P23116|EIF3A_MOUSE	35.8	40	1344	42	3	23	0	1203
TI_asb-294	294	1	1	644	613	23	0	1	1	-1	Unknown product	uk				644	201	IQTNIFNLLYSIFQKFFFFFLYXXXXKNXILXKTQHSQNXKNLLNLNFPLSPISNXKXXPNQXIXYS	5
TI_asb-295	295	3	3	881	845	77	3	0	3	3	CG5112 - lipid particle - fatty acid amide hydrolase	met/lipd	GO	5e-37	32.8	881	522	PGFRHSAALWRHAMSKEPSNFAKDLGNQEKEVSLLAEIPKLVVGLCNYTLPSIIRLIDMKILPPTKANWAEKETAELREELIEMLGTDGVLLFPSSSLDASYHYASFLRPCNFAYCGIFNVLNFPVTQVPLGLSKNGLPVGIQVVSTPYNDHLCIAVAEELEKAFGGWVPPYQT	2	amidotransferase subunit A, putative	2E-045	10	gi|242007160	185	172	520	51	33	83	0	348	5	1	2	N	FOR	Pediculus humanus corporis	Fatty-acid amide hydrolase 2 OS=Homo sapiens GN=FAAH2 PE=2 SV=1	4E-035	10	sp|Q6GMR7|FAAH2_HUMAN	148	176	532	48	33	91	8	354
TI_asb-298	298	1	1	984		22	1	0	1	1	CDC42 Rho GTPase-activating protein	st	KOG	8e-22	32.3	984	723	LVYVYLLSTQRSIIDLSSHFDVPFDPTFTQMQGDLDQQRLLGERHVPTIDPFIAKEIHNQERYDRLLRRAKTEDLTEVSGIGCLYQSGVDRFGRPVVVFVGKWFKFKDLDLDKALLYLICLLDPLVKSDYVIAYFHTNTSNVNYPSLTWLKEVYNILPYKYKKNLKAFYIVHPTFWTKMMTWWFTTFMAPAIKQKVHSLQGIKNLYGVIHPSQLEKPAFITEHNLTINGLRVFKPRFNPIN	2	similar to AGAP005091-PB	3E-062	10	gi|189234389	241	231	581	56	40	100	6	264	32	1	2	N	FOR	Tribolium castaneum	Protein GDAP2 homolog OS=Drosophila pseudoobscura pseudoobscura GN=GA15091 PE=3	3E-053	10	sp|Q292F9|GDAP2_DROPS	209	211	542	52	39	100	4	327
TI_asb-300	300	1	1	630		51	0	1	1	-1	Rhomboid family	st	KOG	8e-73	29.7	630	624	LVALVFTPPVPHQTEYCDFVXGXFPYKGSLCSQVSCLDNVCGMLPFFNSEVPDQFYRLLTSLFLHAGIIQLAISLAIQWFVMRDVEKLTGTLRLIILYIGSGVAGNLASAIFVPYRADVGPAGANSGLLACLIVEILNMWPMLQHPYYALFKHLLIALLLFIIGLLPWFDNFSSFFGFIFGFLLSYAILPYISVGEYERQKKIFLISV	3	similar to rhomboid	2E-063	10	gi|91089053	240	195	1486	61	13	75	0	1224	2	2	3	Y	FOR	Tribolium castaneum	Rhomboid family member 2 OS=Homo sapiens GN=RHBDF2 PE=1 SV=2	6E-047	10	sp|Q6PJF5|RHDF2_HUMAN	187	194	856	47	23	102	0	614
TI_asb-302	302	1	1	524		44	0	1	1	-1	mitochondrial ribosomal protein L33 - mitochondrion - mitochondrial large ribosomal subunit - structural constituent of ribosome - translation	ps	GO	3e-15	87	524	210	GSNRTISTLSASLSRIQLNLCPLTILSIKTIINLLFAFFFKSTLVKNIIYNLNWSFYTYLNSEEIQTSQI	5	mitochondrial ribosomal protein, L33	6E-015	10	gi|170044531	82.4	56	65	71	86	16	0	1	93	1	3	N	FOR	Culex quinquefasciatus	39S ribosomal protein L33, mitochondrial OS=Drosophila melanogaster GN=mRpL33	9E-015	7	sp|Q9W4L1|RM33_DROME	79.7	56	64	71	88	16	0	1
TI_asb-303	303	1	1	571	538	50	0	1	1	-1	Unknown product	uk				571	150	IISKDGYFIVNCKKYRTGKFGVIYSQFFRIYIYIYPALNYSYFSTNLKSN	2	conserved Plasmodium protein, unknown function	1.3	4	gi|124810278	35	114	1966	28	6	81	15	965	72	1	3	N	FOR	Plasmodium falciparum 3D7
TI_asb-304	304	1	1	577	552	50	0	1	1	-1	60S ribosomal protein L26	ps	KOG	9e-57	94.4	577	375	KKWSLRSVHCCGGSLFCIFTLIFSKSQSPATRSPIQNLFTIFIHLQLDNDCLGWMDTDISGGSISFLPLNSFNIDNVFLSVYLNDFAYLLSLIMSTNHLHFVIFPYGHSSYIILLPQFFRKWCRH	6	60S ribosomal protein L26	3E-065	10	gi|149689146	249	144	149	89	97	15	0	6	54	1	3	N	FOR	Triatoma infestans	60S ribosomal protein L26 OS=Mus musculus GN=Rpl26 PE=2 SV=1	3E-051	10	sp|P61255|RL26_MOUSE	201	135	145	73	93	36	0	7
TI_asb-308	308	1	1	728		55	0	1	1	-1	Unknown product	uk				728	723	YDQMICVLKHKFPLYDETECENFKQRVPPMYACDPSFNEHAFYKDIPEIDEVISIKEKQRIFEEYVNARLVEMEDPLMKEDKTLYEKFVLKWYDIKKDVQERFTFQNVTTGIEDFHLDKLFEEAIDKSLPNTCSALERLNVVGDEEDVKFERNTPSEEELRAHYLCYNEDPIPFIEDVLYNTGLHENTVREILAGYDSYPTFRHLMQVACHLAVKDFTVTPDNKDFRMSLPLIRYEMGFAL	2	phosphatidylinositol-4-phosphate 5-kinase isolog; 89655-95590	0.12	10	gi|1931652	39.3	59	859	40	7	35	9	617	278	1	2	N	FOR	Arabidopsis thaliana	Phosphatidylinositol-4-phosphate 5-kinase 7 OS=Arabidopsis thaliana GN=PIP5K7	0.027	10	sp|Q9SUI2|PI5K7_ARATH	39.3	59	754	40	8	35	9	512
TI_asb-309	309	1	1	243	167	39	0	1	1	-1	Unknown product	uk				243	156	AVRQLCDHLYTPATAAVCNKYFILIRVEKKKKKKKKTLLGPPAPFNFKFEKF	1
TI_asb-310	310	1	1	555		39	0	1	1	-1	Unknown product	uk				555	459	CNMELNKLNIVCLIFNLIIVCHAYNEQLSSKLDKMIRILNDIQSEELEHALSIIEQKKKLAKENSDAAVKCCEREGNKYLDQIENNNVAYASEFYKKLNGYWKHLENTESEKVEQAMKETLESLFEKTLTRLQTQGEIITLAFVAKANKCIGF	1	Viral A-type inclusion protein repeat containing protein	0.029	10	gi|170594575	40.4	106	1051	28	10	76	0	784	79	1	1	N	FOR	Brugia malayi	Spindle assembly checkpoint component mad1 OS=Schizosaccharomyces pombe GN=mad1	0.027	10	sp|P87169|MAD1_SCHPO	38.5	109	689	25	16	81	14	54
TI_asb-311	311	1	1	563		37	1	0	1	1	Cyclophilin type peptidyl-prolyl cis-trans isomerase	pm	KOG	8e-71	94.6	563	558	ESYYXXSLLGISSRSSLGYNFVSSLRLNYSKNMSLPKVYFDMEADGQKVGRIVMELRNDVVPRTAENFRALCTGEKGFGYKGSTFHRVIPNFMCQGGDFTKHNGTGGKSIYGIKFEDENFSLKHTGPGVLSMANAGPNSNGSQFFITTVKTSWLDNRHVVFGTVVEGMDVVKKLKSYGISGVAKTS	2	cyclophilin-like protein	2E-072	10	gi|157361501	273	155	165	84	94	24	0	1	98	1	2	N	FOR	Phlebotomus papatasi	Peptidyl-prolyl cis-trans isomerase OS=Blattella germanica GN=CYPA PE=2 SV=1	7E-073	10	sp|P54985|PPIA_BLAGE	273	155	164	84	95	24	0	1
TI_asb-312	312	1	1	415	392	46	1	0	1	1	COX2 cytochrome c oxidase subunit II; Provisional	met/energy	PRK	1e-58	55.5	415	180	SQLAFSDINSPIIEQIVFFHDYSIIIILIITIITIYIIINIITNNFISRSLMEGQEIEII	1	cytochrome c oxidase subunit II	2E-028	10	gi|5835697	126	124	225	54	55	57	0	1	22	1	1	N	FOR	Rhipicephalus sanguineus	Cytochrome c oxidase subunit 2 OS=Rhipicephalus sanguineus GN=COII PE=3 SV=1	4E-029	10	sp|O99819|COX2_RHISA	126	124	225	54	55	57	0	1
TI_asb-314	314	1	1	719		58	1	0	1	1	Tetraspanin family	st	PFAM	1e-42	88.9	719	597	IKRAMGFCECTVKFALFVFNLACALLGLVIPTFSVLAVVQGKSFKTLLDGEITTTGIVMIVIGALVFLIAFFGCCGAIREDTCMLTTYGVILSAILLVQVAIGVMAFVYRGKFEDGFNKGIEQTFEDYRNPESMQVIDELQKNVKCCGVNGPNFWTTPTLPASCCGFDDGSTTCNRNQAYNDGCETKIKNLIKHSFKLL	1	similar to tetraspanin D107, partial	8E-029	10	gi|193615599	129	139	219	46	63	75	5	46	316	1	1	N	FOR	Acyrthosiphon pisum	CD63 antigen OS=Felis catus GN=CD63 PE=2 SV=3	5E-019	10	sp|Q76B49|CD63_FELCA	94.7	193	238	32	81	131	16	10
TI_asb-315	315	1	1	450		49	0	1	1	-1	Alpha tubulin	cs	KOG	5e-61	28	450	387	NSFSYLSKLYLLLHIKMRECISVHVGQAGVQIGNACWELYCLEHGIQPDGQMPSDKTIGGGDDSFNTFFSETGAGKHVPRAVFVDLEPTVVDEVRTGTYRQLFHPEQLITGKEDAANNYARGHYTIGKE	3	tubulin alpha-1 chain	2E-063	10	gi|242017283	243	114	450	100	25	0	0	1	108	1	3	N	FOR	Pediculus humanus corporis	Tubulin alpha chain, testis-specific OS=Oncorhynchus mykiss PE=2 SV=1	6E-064	10	sp|P18288|TBAT_ONCMY	242	114	450	99	25	1	0	1
TI_asb-316	316	1	1	494		30	1	0	1	1	NADH dehydrogenase subunit 4	met/energy	KOG	1e-48	37.1	494	210	GYQPERLRAGFYLLFYTLFASLPLLLGIFYIRRTSCRVFYFLIEVDCNFYLYLSLILAFLVKMPIIFVHF	1	NADH dehydrogenase subunit 4	3E-055	10	gi|11182470	216	149	443	73	34	40	0	120	46	1	1	N	FOR	Triatoma dimidiata	NADH-ubiquinone oxidoreductase chain 4 OS=Ceratitis capitata GN=ND4 PE=3 SV=2	1E-032	10	sp|Q34048|NU4M_CERCA	138	152	446	48	34	78	3	121
TI_asb-317	317	1	1	619	596	56	1	0	1	1	NADH-ubiquinone oxidoreductase chain 5 - NADH dehydrogenase (ubiquinone) - mitochondrial electron transport NADH to ubiquinone	met/energy	GO	7e-25	37	619	408	FFFFFFFWDYVIFIDWEILSMNGCSITMTFLFDWISLIFVGCVFVISSMVIYYRERYMGSDVDRVRFYFLVFLFVMSMMIIIVRPNLIRILIGWDGLGLVSYCLVIYFQNYKSYSAGILTILTNRVGDVAILLSIA	6	NADH dehydrogenase subunit 5	8E-085	10	gi|11182469	315	198	570	77	35	45	0	32	3	1	-3	N	REV	Triatoma dimidiata	NADH-ubiquinone oxidoreductase chain 5 OS=Aedes aegypti GN=mt:ND5 PE=3 SV=1	2E-063	10	sp|B0FWD3|NU5M_AEDAE	241	199	580	62	34	75	2	33
TI_asb-318	318	1	1	534		29	1	0	1	1	C-type lysozyme	imm	CDD	1e-40	100.8	534	408	ILLLCLTAFLGVSEARVFTRCGLAKELVAHGIPRRDLANWVCLIEAESGRNTAARGGPNHDGSYDNGLFQINDRFWCTYGKPGHDCHVRCEDLRTDDIRASVKCALLIKSRQGWKAWYGWQNKCRGRKLPNVDVCF	2	lysozyme	2E-078	10	gi|32454476	293	136	139	97	98	4	0	4	2	1	2	N	FOR	Triatoma infestans	Lysozyme c-1 OS=Anopheles gambiae GN=AGAP007347 PE=2 SV=2	1E-033	10	sp|Q17005|LYSC1_ANOGA	142	135	140	47	96	71	0	7
TI_asb-320	320	1	1	744		49	0	1	1	-1	Beta tubulin	cs	KOG	0	64	744	714	YDICFRTVKLSTPTYGDLNHLVSLTMSGVTTCLRFPGQLNADLRKLAVNMVPFPRLHFFMPGFAPLTSRGSQQYRALTVPELTQQMFDAKNMMAACDPRHGRYLTVAAIFRGRMSMKEVDEQMLNIQNKNSSYFVEWIPNNVKTAVCDIPPRGLKMSATFIGNSTAIQELFKRISEQFTAMFRRKAFLHWYTGEGMDEMEFTEAESNMNDLVSEYQQYQETTADEDADFNQENEQEVQ	2	beta-tubulin	1E-132	10	gi|112983318	474	238	447	96	53	9	0	208	2	1	2	N	FOR	Bombyx mori	Tubulin beta-1 chain OS=Manduca sexta PE=2 SV=1	1E-133	10	sp|O17449|TBB1_MANSE	475	238	447	96	53	8	0	208
TI_asb-321	321	1	1	984	939	40	1	0	1	1	Glutaredoxin	pm	KOG	2e-07	29.8	984	309	IYHLRNMLRKRMLGVGIFLIGGRLGNFKKCIMQTKLYFKRGRKKICFHRLEFNKRCMHQVILCVCEQIFYTYCAISYTYILNISAIIYIYTRTQTHTWICLLY	5	glutaredoxin 2	3E-009	10	gi|170046276	65.5	44	112	65	39	15	0	6	130	1	1	N	FOR	Culex quinquefasciatus	Glutaredoxin-C4 OS=Arabidopsis thaliana GN=GRXC4 PE=2 SV=2	1E-005	10	sp|Q8LFQ6|GRXC4_ARATH	51.2	36	135	61	27	14	0	28
TI_asb-322	322	1	1	457		23	1	0	1	1	Unknown product	uk				457	201	KKGVVERSLLHCHLHELLCYALASQSTPIRCHRRTSPTYSTTSIKLTSLRNANSLTGSRECIYRSFF	6	novel protein	0.53	4	gi|148880029	35.4	83	363	32	23	56	0	191	62	1	-1	N	REV	Danio rerio	Peptidyl-prolyl cis-trans isomerase D OS=Buchnera aphidicola subsp. Schizaphis	5.9	2	sp|Q8K987|PPID_BUCAP	30	32	621	50	5	16	2	119
TI_asb-323	323	1	1	358	325	39	1	0	1	1	bc10 CG4867-PA	uc	NR-LIGHT	1e-31	95	358	231	KQWLIPVLLIPKPVNPTLLQTHVMFMVMNLTGFFIERRPCRICSLVFLSAVFLICYSGLGSCIFWSNNCDNVRCDDS	1	similar to bc10 CG4867-PA	1E-031	10	gi|110760278	137	76	80	77	95	17	0	5	79	1	1	N	FOR	Apis mellifera	Bladder cancer-associated protein OS=Rattus norvegicus GN=Blcap PE=2 SV=1	8E-018	10	sp|P62950|BLCAP_RAT	89	76	87	55	87	34	0	5
TI_asb-324	324	3	3	1087	1052	65	3	0	3	3	multifunctional chaperone	pm	NR-LIGHT	0	93.9	1087	765	EFLVKPVGMSVDKEELVQRAKLAEQAERYDDMASTMKAVTETGVELSNEERNLLSVAYKNVVGARRSSWRVISSIEQKTEGSERKQQMAREYREKVEKELRDICYDVLALLDRFLIPKASNAESKVFYLKMKGDYYRYLAEVATGDTRNAVVDDSQKAYQDAFEISKSKMQPTHPIRLGLALNFSVFYYEILSSPDKACHLAKQAFDDAIAELDTLNEDSYKDSTLIMQLLRDNLTLWTSDTQGDGDEPQEGGDN	2	multifunctional chaperone	1E-124	10	gi|263173438	446	232	247	98	94	4	0	1	77	1	2	N	FOR	Cimex lectularius	14-3-3 protein zeta OS=Bombyx mori GN=14-3-3zeta PE=2 SV=2	1E-118	10	sp|Q2F637|1433Z_BOMMO	424	232	247	92	94	17	0	1
TI_asb-326	326	1	1	827	791	47	0	1	1	-1	PTZ00141 elongation factor 1- alpha; Provisional	ps	PRK	2e-64	28.9	827	390	PPKAAADFTAQVIPSNHPGQIANGYTPVLDCHTAHIACKFAEIKEKCDRRTGKTTEENPKSIKSGDAAIINLVPTKPMCVESFQEFPPLGRFAVRDMRQTVAVGVIKSVTNKDVTTGKVTKAAEKAQKKK	2	putative elongation factor 1-alpha	6E-061	10	gi|307095102	236	117	462	98	25	2	0	333	2	1	2	N	FOR	Triatoma matogrossensis	Elongation factor 1-alpha OS=Apis mellifera PE=3 SV=1	6E-055	10	sp|P19039|EF1A_APIME	214	113	461	91	25	10	0	333
TI_asb-327	327	1	1	998	702	26	1	0	1	1	Unknown product	uk				998	264	HPPPPPRPQKYFRKKKKKKKKKFFFKKFLKFFLKNFWGEYFFLKKFCPILFFGERKKKKKFLFFFFFFKKKIFQNFSFPAPNFCVTFF	4																			Protein CrcB homolog 1 OS=Lactobacillus acidophilus GN=crcB1 PE=3 SV=1	9.2	1	sp|Q5FKD2|CRCB1_LACAC	31.6	69	129	34	53	45	3	43
TI_asb-328	328	1	1	866	413	25	1	0	1	1	Unknown product	uk				866	447	KKMGCFLKKIFPGFFLQKFIRGYNFFFFPPFGGGTNLGEGGMVGGLFFFFPPAGEKGGFCSRGIKLGNPRGFPPPRRLKRPAPGILIGFPFGGIAKWSSNFGPILNFFEFWIGWGRGGRQVFFFFFFFFFSKGTSTQTYTSIHQVVEQI	5	hypothetical protein HMPREF9532_00106	3.9	9	gi|324010149	34.7	34	58	50	59	17	0	22	584	1	-2	N	REV	Escherichia coli MS 57-2	3-ketodihydrosphingosine reductase TSC10 OS=Yarrowia lipolytica GN=TSC10 PE=3	2.6	2	sp|Q6CE86|TSC10_YARLI	33.1	30	372	46	8	16	0	340
TI_asb-330	330	1	1	162	137	37	1	0	1	1	Unknown product	uk				162	159	FFFFFFFFLVEVVLCKESYSDYTLRERCSAKLYIPNQCYLKLNTRNNQFSSLG	4
TI_asb-331	331	1	1	74	35	15	0	1	1	-1	Unknown product	uk				74	72	GSGGCMVAKNKEKKKKKSVGPFAL	1
TI_asb-332	332	1	1	675	652	39	1	0	1	1	effete - protein ubiquitination - compound eye photoreceptor cell differentiation - regulation of R7 cell differentiation - oogenesis - compound eye	st	GO	2e-81	97.9	675	471	CFIYKYQNHPPPWKRIIKELQDLGRDPPAQCSAGPFLDDLFHWQATIMGPPDSPYQGGVFFLTIHFPTDYPFKPPKVAFTTRIYHPNINSNGSICLDILRSQWSPALTISKVLLSICSLLCDPNPDDPLVPEIARIYKTDREKYNELAREWTRKYAM	2	effete	3E-080	10	gi|24646906	300	144	147	97	98	3	0	4	92	1	2	N	FOR	Glossina morsitans morsitans	Ubiquitin-conjugating enzyme E2-17 kDa OS=Drosophila melanogaster GN=eff PE=1	7E-081	10	sp|P25867|UBCD1_DROME	300	144	147	97	98	3	0	4
TI_asb-334	334	1	1	498		50	1	0	1	1	Unknown product	uk				498	318	WDVAVFSRPIPRHLVGSLAGHCGLWRHLYIMELMPDPFCRVCETEEETPIHLKTDCLGFEEIRFRTFGRSRMSVEELRLFPLKVIVRFIRTVVNLRWIKSGSGFLF	3	Lian-Aa1 retrotransposon protein	1E-004	10	gi|2290213	48.1	81	1189	32	7	55	0	1107	57	1	3	N	FOR	Aedes aegypti	Immunoglobulin G-binding protein A OS=Staphylococcus aureus (strain NCTC 8325)	1.5	10	sp|P02976|SPA_STAA8	32.3	32	516	43	6	18	0	328
TI_asb-335	335	1	1	565	438	38	1	0	1	1	Pancreatic lipase-like enzymes	met/lipd	CDD	8e-28	39.2	565	384	VQILPHNPADLIHTDGRYAGPPGSLGHVDFYPNGGTAIQPGCGWDVLTLRSHRRAYWLFAESITTPEGFSAVPCDSWEHFEQNNCKDGNLTVMGEHVSPRARGAYYLRTNYKTPFALETVEKIRSNKK	2	hypothetical protein TcasGA2_TC000236	4E-021	10	gi|270001417	103	110	304	47	36	58	1	198	35	1	2	N	FOR	Tribolium castaneum	Pancreatic triacylglycerol lipase OS=Cavia porcellus GN=PNLIP PE=2 SV=1	1E-009	10	sp|P50903|LIPP_CAVPO	63.2	139	465	31	30	95	32	217
TI_asb-336	336	1	1	600		56	0	1	1	-1	60S ribosomal protein L5	ps	KOG	7e-86	72.3	600	453	CYNLGFVKVVKNKQYFKRYQVKFKRRREGKTDYYARKRLIVQDKNKYNTPKYRLIVRLSNKDITCQVAYSRIEGDKIVCAAYSHELPVYGIKVGLTNYAASYCTGLLLARRLLQKLKLDKLYSGTTDVTGDEYNVENLDEGPGAFRCYLDV	2	ribosomal protein L5	9E-094	10	gi|307095210	344	191	288	89	66	20	0	1	26	1	2	N	FOR	Triatoma matogrossensis	60S ribosomal protein L5 OS=Bombyx mori GN=RpL5 PE=2 SV=1	5E-087	10	sp|O76190|RL5_BOMMO	320	191	299	80	64	38	0	1
TI_asb-338	338	1	1	1017		30	1	0	1	1	Nuclear hormone receptor FTZ-F1 Pediculus humanus corporis	st	NR-LIGHT	2e-71	44.8	1017	552	LSVEWARNSIFPSEGKVDXXMKXLXPSWADMLVLDHMHQRMHNRLPDETTLPNGQKFDLLSLGLLGVPSLSEHFTEISGKLTDLKFDPSDYICIKFLLLLNPDVRGLMNRKHVQEGHEQVQKALHDYCLNSYPQIQDKFNKLLLILPEIHILASRGEEHLYMKHCSGGAPTQTLLMEMLHAKRK	2	Nuclear hormone receptor FTZ-F1, putative	2E-071	10	gi|242019865	271	182	406	71	45	51	0	225	8	1	2	N	FOR	Pediculus humanus corporis	Nuclear hormone receptor FTZ-F1 OS=Bombyx mori GN=FTZ-F1 PE=1 SV=2	8E-063	10	sp|P49867|FTZF1_BOMMO	241	182	534	63	34	67	0	352
TI_asb-339	339	1	1	640	619	47	0	1	1	-1	truncated histone H1	nr	NR-LIGHT	4e-47	60.9	640	639	CAFINMTETIEPSTVESSPTAATKKATLSPKKKVGAKAAKKKATHPPTSQMVTAAIKDLKERGGSSLQAIKKYISTTYNIDAEKMSLFIRKYIKSAVESGELVQTKGKGAAGSFRLGGSEGNVKSKKTTTKAKPKKPAAEKKATATKKKASPVKKKVAAPLKAKKAKKPPTTPKAPKAKKVTPTKTKKAATPKAKPKKAATKKAAHKKKKKKK	1	truncated histone H1	4E-047	10	gi|149689210	189	120	197	84	61	19	0	1	16	1	1	N	FOR	Triatoma infestans	Histone H1.3 OS=Drosophila virilis GN=His1.3 PE=3 SV=1	2E-024	10	sp|Q94972|H13_DROVI	112	107	250	54	43	49	0	25
TI_asb-344	344	1	1	636	614	41	1	0	1	1	Unknown product	uk				636	339	PIQKSTYINEEGKIINIWHRNGTIFVLKNEAEITTNIVIPNEISFANYIKEKGFCSITVLKIIIKFNSLDPLILKSELTNGESKCLSPSIILKKSFGNKNPKISKPLKKKKKK	3	conserved Plasmodium protein, unknown function	1.7	7	gi|296004983	35	80	1297	33	6	53	9	949	270	1	-2	N	REV	Plasmodium falciparum 3D7	Undecaprenyl-phosphate 4-deoxy-4-formamido-L-arabinose transferase	0.67	9	sp|Q8D342|ARNC_WIGBR	34.3	76	323	28	24	54	0	201
TI_asb-346	346	2	2	641	553	76	0	2	2	-2	Serpentine type 7TM GPCR chemoreceptor Srz	st	PFAM	4e-07	69.1	641	231	LIIFHRCNYGWFRLIRGRKCYCFLSFYDSPNFLSINRLGSPIYPLYCTFPNSNISTARSDQHFVIKLTNSLKRFFDN	6	similar to Tubulin alpha-6 chain (Alpha-tubulin 6) (Alpha-tubulin isotype	0.008	7	gi|110763493	42.7	78	542	34	14	51	0	455	37	1	1	N	FOR	Apis mellifera	Sensitive to high expression protein 9 homolog, mitochondrial OS=Debaryomyces	2.0	3	sp|Q6BJ94|SHE9_DEBHA	32.7	68	462	36	15	43	7	12
TI_asb-347	347	1	1	770		36	1	0	1	1	Unknown product	uk				770	198	ENAEYCKNILTKVLCIFKLISFSTSFENIYKASIFMAGPRIQLSTCCQGNVKSLPVRFLNEIRFII	5	putative polygalacuronase isoenzyme 1 beta subunit	4.2	3	gi|110735746	34.3	47	622	42	8	27	1	387	600	1	3	N	FOR	Arabidopsis thaliana	Probable polygalacturonase non-catalytic subunit JP630 OS=Arabidopsis thaliana	0.94	2	sp|P92982|JP630_ARATH	34.3	47	622	42	8	27	1	387
TI_asb-348	348	1	1	501		50	0	1	1	-1	Unknown product	uk				501	138	DWFLIIFGTSSNLVYLRGERENVRLLAKLLASRCEQAYIKNSLLQV	6
TI_asb-349	349	1	1	963	875	21	0	1	1	-1	Unknown product	uk				963	279	KIIPPPPIYFIKKIIKNYKKIFFFFFFFFLFPPKKKIIKFFFKHKKKKNFFPFKKKKKILKPFSPPFISHPPKLKKNKFFFFLIPPFKNFFPH	6
TI_asb-350	350	1	1	549		55	0	1	1	-1	PTZ00009 heat shock 70 kDa protein; Provisional	pm	PRK	2e-42	18.3	549	357	VISAKNALESYCFNPMSTVEDEKLKDKISLSDKNTILEKCNEVIRWLDANQLAEKEEFEHKQKELEQLCNPIITKLYQSGAAPGGMPGGFPGGFPGAGGAAPGAGGAAGAGGPTIEEVD	1	hypothetical protein DAPPUDRAFT_256736	1E-030	10	gi|321459623	134	77	664	79	12	16	0	552	4	1	1	N	FOR	Daphnia pulex	Heat shock 70 kDa protein cognate 4 OS=Manduca sexta PE=2 SV=1	1E-030	10	sp|Q9U639|HSP7D_MANSE	132	77	652	80	12	15	0	536
TI_asb-353	353	1	1	401		34	1	0	1	1	Unknown product	uk				401	144	FSTKCSKNIFSEIIQIELVNNILKSSLFEDLEFYNFYPWQCRCIFCVF	1	hypothetical protein	2.0	2	gi|156097045	33.5	63	1112	34	6	41	4	238	59	1	-2	N	REV	Plasmodium vivax
TI_asb-354	354	1	1	545		52	0	1	1	-1	Predicted receptor-like serine/threonine kinase	st	KOG	1e-30	27.6	545	390	VNNKMFLKIIYKPLLLILTTLLASVSDVVSFGDIIYAINAGGEAHTDIFGIRYERDPLFGKIGTPSDYGKQLLIGRVPANDQILYQTERYHHSTFGYDIPINQDGDYVLVLKFCEVYFNAPNMKVFDIVL	1	conserved hypothetical protein	6E-045	10	gi|242013531	182	101	271	84	37	16	0	28	241	1	1	N	FOR	Pediculus humanus corporis	Malectin OS=Rattus norvegicus GN=Mlec PE=2 SV=1	5E-029	9	sp|Q5FVQ4|MLEC_RAT	127	97	291	58	33	40	0	47
TI_asb-357	357	1	1	649	1	20	1	0	1	1	DNA-directed RNA polymerase I subunit RPA34	tm	PFAM	7e-11	21.8	649	420	KKKKKKKKKKKKKKKTPLLKKKKKKKKKKKKLEKKKKKKKKKTWWGPPAPSTFNLGKVLGGGPIWGSLGHFPLWGAFLNFRGRLFTPPGGENPGVSPFYSLGTTPPFPRGGKKQKAPPHSPFPTFAPPEGERKFERFNFL	2	hypothetical protein	0.001	10	gi|172051224	45.8	45	122	53	37	21	0	72	141	1	3	N	FOR	Ornithodoros coriaceus	Translation initiation factor IF-2 OS=Streptomyces griseus subsp. griseus	0.007	10	sp|B1VYN5|IF2_STRGG	40.8	67	1038	37	6	42	0	267
TI_asb-358	358	1	1	606		29	1	0	1	1	GTPase Rab5/YPT51	pe	KOG	5e-51	77	606	531	RMVYVQFLTLSMADQLVNGGSGNYNFKVVLLGEGCVGKTSVVLRYVEDKFNEKHLTTLQATFLNKKLSIGGKRINLAIWDTAGQERFHALGPIYYRMSNGAVLVYDITDEDSFQKVKNWVKELKKMLGSEICLTIAGNKIDLQKERNVPVETAENYAASVGAVHFHTSAKQNTGIEE	1	Ras-related small GTPase	3E-091	10	gi|149898836	336	167	218	99	77	1	0	1	106	1	1	N	FOR	Triatoma infestans	Ras-related protein Rab-21 OS=Canis familiaris GN=RAB21 PE=3 SV=3	9E-072	10	sp|P55745|RAB21_CANFA	269	165	223	78	74	35	5	6
TI_asb-360	360	2	2	888	860	59	2	0	2	2	lola like - protein binding - chromatin silencing - nucleus - specific RNA polymerase II transcription factor - regulation of transcription from RNA	tm	GO	5e-51	96	888	468	LGLSLECSVSNKFVISFLPPVDIFCLFDSQPKMAGDQQQFFLKWNDFQSNMVTSFKHLRDEKSFTDVTLACDGQTRKAHKMVLSACSPYFKTLLEENPSKHPIIILKDVPFQHLSAILEFIYSGEVNVPQDQLNVFLKTAERLKVKGLTDPQHSNN	2	similar to CG5738-PA	2E-053	10	gi|156550568	211	118	127	86	93	16	0	1	116	1	2	N	FOR	Harpegnathos saltator	Longitudinals lacking protein-like OS=Drosophila melanogaster GN=lolal PE=1 SV=1	2E-050	10	sp|Q7KRI2|LOLAL_DROME	199	122	127	79	96	25	0	1
TI_asb-361	361	5	5	546	512	91	1	4	3	-3	Cytochrome c oxidase subunit VIIa	met/energy	CDD	1e-10	100	546	309	TAILCYIQVSSNTKNLSLLRSALAPLARNSRSFVSSPISRTTTEVPPGYKHMQVKAGRFNLEDGKPVFIKGGTLDSILYKLTMGACVGAVVWDLILYYELAQR	1	AGAP000109-PA	7E-006	10	gi|158289290	52.4	61	91	40	67	36	0	25	121	1	1	N	FOR	Anopheles gambiae str. PEST	Cytochrome c oxidase subunit 7A1, mitochondrial OS=Saimiri sciureus GN=COX7A1	0.001	10	sp|Q53CF6|CX7A1_SAISC	43.1	60	80	36	75	38	0	14
TI_asb-367	367	1	1	861	834	27	1	0	1	1	Amphoterin-induced protein 2 precursor Pediculus humanus corporis	uc	NR-LIGHT	2e-14	17.4	861	501	RWIMESQYISPLLSLHKYNTIGNFWPIFISVSVTQEPTQVEGGIYPDLLDLPHRKSVAVSTDQSYYATLPLVRRLPESPQVKLGPKYDNMGPRVTAAGSSTISLPDSGEPIAIGIEPATSDSTTPTATFEIGICLALKDSPLPITILYPPLNYIFSKIFLIRCFFPP	3	Amphoterin-induced protein 2 precursor, putative	2E-014	10	gi|242008917	82.4	113	648	49	17	57	25	508	66	1	3	N	FOR	Pediculus humanus corporis	4-coumarate--CoA ligase 3 OS=Arabidopsis thaliana GN=4CL3 PE=1 SV=1	2.5	2	sp|Q9S777|4CL3_ARATH	33.1	50	561	34	9	33	0	468
TI_asb-369	369	1	1	421	387	41	1	0	1	1	Unknown product	uk				421	159	IIKLLHIISLNKWLHWFFYFVLTFHCTPRKKIPFFLRLSATKAKTFKTLRCTT	4	fatty acyl-CoA reductase 1	5.8	5	gi|149944691	32	53	515	24	10	40	0	349	29	1	-1	N	REV	Bos taurus	Fatty acyl-CoA reductase 2 OS=Bos taurus GN=FAR2 PE=2 SV=1	2.1	6	sp|Q0P5J1|FACR2_BOVIN	31.2	57	515	29	11	40	0	351
TI_asb-370	370	1	1	620	584	58	0	1	1	-1	capsid protein precursor Triatoma virus	vir/	NR-LIGHT	2e-96	20.6	620	615	LLKILHLNKDLKIPSRGGEINESIEFRNPITTFVDDNPIITEQLIGDSPQPSGDVRSVSDARTHSIIDFLERPQFIGSFLWNTSDIENKEIFSLKLPDALMSPMIREKLSGFTSFSASTVFHIQVNAHPFQCGRLVLAAVPVPDILPLHRLNMLSFDVSNVVTLPHVQLDISKETEVLLKIPYVSPFVQYDLVXKKKKKKKKKNM	2	capsid protein precursor	2E-096	10	gi|20451030	347	179	868	97	21	5	0	15	1	2	2	Y	FOR	Triatoma virus	Structural polyprotein OS=Cricket paralysis virus PE=1 SV=2	2E-020	10	sp|P13418|POLS_CRPV	99	134	895	38	15	82	1	60
TI_asb-372	372	1	1	846	825	40	0	1	1	-1	Unknown product	uk				846	183	GSLCKIKILIKNVTYWAKLFCIRTLFWNPTFFFYLFFFKKTHCSPGNFCLKKIFFKKKKKK	3																			Lipoyl synthase OS=Pelagibacter ubique GN=lipA PE=3 SV=1	1.9	1	sp|Q4FM35|LIPA_PELUB	33.5	57	308	38	19	35	4	254
TI_asb-376	376	1	1	426		24	0	1	1	-1	Unknown product	uk				426	201	NSNLLKAISTVVKATVTAARSRHSYLEFLALSQLSFGHHSYLKHLKLQHFSILTVYIAALYNLVNTI	6	putative autolysin	3.5	2	gi|290580821	32.7	63	327	33	19	42	3	81	173	1	-3	N	REV	Streptococcus mutans NN2025
TI_asb-379	379	1	1	632		59	1	0	1	1	Unknown product	uk				632	114	LANKTFLNILYFLKIIIYTLHILYLFNWRKLSIQFKIK	5	Wzx	0.44	1	gi|299482790	37	85	413	27	21	62	0	145	188	1	2	N	FOR	Escherichia coli	Uncharacterized protein RP382 OS=Rickettsia prowazekii GN=RP382 PE=4 SV=1	9.6	1	sp|Q9ZDE9|Y382_RICPR	30.4	34	510	41	7	20	2	145
TI_asb-380	380	1	1	304		21	1	0	1	1	Unknown product	uk				304	150	CTVRTFLTILKIHSDSFFEVIVFEMKFGYMIKTATVSISLLMVIRCKKTC	1	CCAAT-box DNA binding protein subunit B	2.6	2	gi|82596209	33.1	49	859	32	6	33	0	567	96	1	-3	N	REV	Plasmodium yoelii yoelii
TI_asb-382	382	2	2	902	872	70	2	0	2	2	cationic amino acid transporter Culex quinquefasciatus	tr	NR-LIGHT	2e-22	16.9	902	270	MRFTRPNFPRPYKVPIIIPVIVLVISMYLIVAPIIDTPQIEYLYASFFILGGLIFYIPFVHYGISSPFMERFTVFCQLLFEVSPTQSVYE	3	hypothetical protein TcasGA2_TC000583	3E-023	10	gi|270001710	111	90	533	54	17	41	0	444	3	1	3	N	FOR	Tribolium castaneum	Solute carrier family 7 member 13 OS=Rattus norvegicus GN=Slc7a13 PE=2 SV=1	1E-011	7	sp|Q5RKI7|S7A13_RAT	70.9	82	479	32	17	55	0	383
TI_asb-384	384	1	1	657		54	0	1	1	-1	Catalase	detox/ox	PFAM	0	48.1	657	642	WYSVKNPMPRDPSAEQLNEYKSAQKSASVLTTGTGAPLETKTATLTVGPKGPVLLQDFGFIDELAHFDRERIPERVVHAKGAGAFGYFEVTNDVSKYTKLSVFSKIGKRTPVAVRFSTVGGESGSADTARDPRGFAVKFYAEDGNWDVVGNNTPIFFIRDPILFPSFIHTQKRNPVTHLKDADMFWDFISLRPESTHQTMILFSDRGTPDGYRH	3	catalase	2E-094	10	gi|157135803	347	208	505	78	41	45	0	1	33	1	3	N	FOR	Aedes aegypti	Catalase OS=Drosophila melanogaster GN=Cat PE=1 SV=2	4E-090	10	sp|P17336|CATA_DROME	330	207	506	74	41	53	1	4
TI_asb-386	386	1	1	472		40	0	1	1	-1	polyprotein Slow bee paralysis virus	vir/	NR-LIGHT	7e-31	4.4	472	471	RQYKGLCGAAVVVGNLNNGNGAIVGFHVAGGNGRGIAEPLYLEAVEQLTGHCKRKDPKVILPKVEEIDVTTINFEGNFLAYGKIDPKYAHTESGKTKYIPSPLAGSIYSVKTEPNPLKPNDPRQPPGSDPLRDGCKKHGSGDIRPFSKQILDMVKVD	1	polyprotein	7E-031	10	gi|296005647	134	131	2964	48	4	68	0	2398	79	1	1	N	FOR	Slow bee paralysis virus	Genome polyprotein OS=Rice tungro spherical virus (strain A) PE=1 SV=1	3E-004	10	sp|Q83034|POLG_RTSVA	44.7	146	3473	31	4	100	17	2830
TI_asb-387	387	2	2	777	758	70	2	0	2	2	Unknown product	uk				777	108	YIFFFSVLFPFFIWSLVRFCLMWAYNILINNYMSVR	2	predicted protein	5.5	1	gi|297822551	33.9	25	74	60	34	10	0	22	537	1	-2	N	REV	Arabidopsis lyrata subsp. lyrata	Uncharacterized membrane protein YOR365C OS=Saccharomyces cerevisiae GN=YOR365C	4.7	1	sp|Q08844|YO365_YEAST	32	28	703	50	4	14	0	609
TI_asb-388	388	1	1	407	373	70	1	0	1	1	60S ribosomal protein L37	ps	NR-LIGHT	1e-47	100	407	300	RSLTSLRRRTADLTEVAAVVETTQAPPATVLLHLLHDQMPTQVLFMAVFPQKEHGYFPCWVISIFLTILRKEAPYLVPYFPVIPTFLVCGAIFYTMVCFC	4	60S ribosomal protein L37	1E-047	10	gi|149689118	190	92	92	98	100	1	0	1	43	1	1	N	FOR	Triatoma infestans	60S ribosomal protein L37a OS=Drosophila melanogaster GN=RpL37A PE=1 SV=3	2E-039	10	sp|Q9VMU4|RL37A_DROME	160	91	92	84	99	14	0	1
TI_asb-389	389	1	1	584		49	1	0	1	1	Unknown product	uk				584	384	REGNDADGVLTPKFLKEWPLPNSHSGKYWSLIPLKISPKKLQVVANDNSLNGTTYSLINNNCQHWVKVAAETISSDLADSLDKYRTSDEVPIVEQAVLGTWASSKATSSNVFSSLLGIAKAGWDAIEQ	1	structural protein	0.21	10	gi|189007679	37.7	90	1160	24	8	68	0	1025	187	1	1	N	FOR	Bombyx mori densovirus Zhenjiang	Spike glycoprotein OS=Human coronavirus 229E GN=S PE=1 SV=1	0.96	6	sp|P15423|SPIKE_CVH22	33.5	77	1173	31	7	53	0	462
TI_asb-391	391	1	1	415		39	0	1	1	-1	Unknown product	uk				415	345	SFFTFRGVKCLITSYFYAILLTHCIGIKSDEKNNEEIESPSDIASVSKFIKEFHRKLEEDLYPIVDYDTSNDSDMNPPYINDNVTNSANKSGSSEKNVTSLVNCNTERKPGGLTV	1	hypothetical protein	0.081	10	gi|256081126	38.1	52	750	32	7	35	0	234	235	1	1	N	FOR	Schistosoma mansoni	DNA double-strand break repair rad50 ATPase OS=Methanobacterium	0.32	10	sp|O26640|RAD50_METTH	33.9	93	837	25	11	69	16	369
TI_asb-396	396	1	1	988	950	20	1	0	1	1	Cystatin-like domain	s/protinh	SMART	2e-12	64.4	988	375	HSAILRVKIYNMKPITFLSVAAPVRKFMLINSYAEAKVCAGCVQDADPNDPEIKKLLVQVLVAQSEDCDIIKVIRAKTQVVSGIKYIIDFEVKERKTNKVKICSTNFLLANHGGSNYLWYNNFYV	3	kininogen-1 isoform 3	0.005	10	gi|262050546	44.7	69	391	33	18	46	6	226	138	1	3	N	FOR	Homo sapiens	Kininogen-1 OS=Homo sapiens GN=KNG1 PE=1 SV=2	0.001	10	sp|P01042|KNG1_HUMAN	44.7	69	644	33	11	46	6	262
TI_asb-398	398	2	2	541		73	1	1	0	0	Unknown product	uk				541	207	DTNLILPDILPDYIIFVVVVNSNILFLSSNLISPNKPTDYSSNTTYHINRLYYYRRRRNKQFFFFELLI	4	hypothetical protein	9.7	1	gi|68064137	32	96	329	25	29	72	3	4	253	1	-2	N	REV	Plasmodium berghei	Ribosomal operon-associated A protein OS=Astasia longa GN=roaA PE=3 SV=1	1.8	1	sp|P58145|ROAA_ASTLO	32.3	52	519	28	10	37	0	51
TI_asb-401	401	1	1	454		45	1	0	1	1	Nuclear protein contains WD40 repeats	uc	KOG	0	4.1	454	294	NILIGFKNTANYIIIIIMGARQTKRSVDISTTPKKEKGEGVVEEKLEKIEEQDLAKVQNGTAHTENQEGGEGGDNAIVNGGGGGEEKVEEAKEVXXKK	1	hypothetical protein TcasGA2_TC012685	3.5	3	gi|270013992	32.7	18	277	83	6	3	0	84	205	1	1	N	FOR	Tribolium castaneum	Lipoxygenase 5, chloroplastic OS=Arabidopsis thaliana GN=LOX5 PE=1 SV=2	7.5	2	sp|Q9LUW0|LOX5_ARATH	29.6	25	886	40	3	15	0	667
TI_asb-402	402	1	1	157	132	48	1	0	1	1	Unknown product	uk				157	114	SQILNFTNHLFPSAHPKSNVHLSINFEITSKKKKKKKK	1
TI_asb-403	403	2	2	797	763	44	0	2	2	-2	ND5 NADH dehydrogenase subunit 5; Provisional	uc	PRK	9e-11	42.3	797	243	MLNNNFLLKYNINKKNYTIFFRFFFFYIFFSFASYKIYNRYDLRKKIKKATQIKYKVKVSNNGLNSKNGKEIYNSIKGVVC	4	hypothetical protein	0.23	1	gi|68061273	38.5	44	90	43	49	25	0	4	17	1	2	N	FOR	Plasmodium berghei
TI_asb-404	404	1	1	641		52	0	1	1	-1	cathepsin D	pm	NR-LIGHT	0	47.4	641	555	MYKTPRPVEELQKELKVYKDGLKMYSMLKKSGREVLRNSFNTQYYGNITLGTPPQEFTVIFDTGSSNLWIPSAVCSSVACRVHNTYDHDRSSTYQPDGRILRLTYGTGSIAGIMSSDVLQIGDLQVKNQLFGEALQVSDSPFARAKPDGILGLAFPSIAQDHAVPPFFNMIKQELLDKPVFSVYL	1	cathepsin D	1E-107	10	gi|301030231	375	185	390	100	47	0	0	1	3	2	1	Y	FOR	Triatoma infestans	Cathepsin D OS=Gallus gallus GN=CTSD PE=1 SV=1	2E-041	10	sp|Q05744|CATD_CHICK	168	154	398	50	39	76	2	68
TI_asb-405	405	1	1	832		32	1	0	1	1	oo18 RNA-binding protein - positive regulation of oskar mRNA translation - protein binding - germ cell development - oocyte axis specification -	ps	GO	7e-57	16.6	832	489	LGSAYWPVGLISQKLDPQTFYRVGALHGMINAEALAKIMNDLFGGVVYAGLDTDKYKYPIGSGRVTFSNYWSYMKAVVTAFIEIKTSQFTKKVQVDPCLEDSPCSTCNVQQGPYFCREMVCFRYYCRSCWSWQHSNESMRTHKMLTRNSKNTNITPLGKPRLN	3	Cytoplasmic polyadenylation element-binding protein, putative	2E-058	10	gi|242019529	228	146	375	71	39	42	0	217	39	1	3	N	FOR	Pediculus humanus corporis	Cytoplasmic polyadenylation element-binding protein 1-B OS=Xenopus laevis	2E-056	10	sp|Q52KN7|CPE1B_XENLA	219	140	568	70	25	41	0	425
TI_asb-406	406	1	1	332		25	1	0	1	1	Serpentine type 7TM GPCR chemoreceptor Srz	st	PFAM	2e-08	33.8	332	147	FFFFLFSLFFFFFLFFFNFLNLFIYLFFVCFYLFTIMILFTIPFTLNTI	6
TI_asb-407	407	1	1	328		31	1	0	1	1	Nuclear protein contains WD40 repeats	uc	KOG	0	6.7	328	177	IQQEVLDQQLLQIVGLITGYIGWDHAWVEFWQLYFTHQFWQHHRKLKGLDSKQGDAQTA	2	Aquaporin AQPcic, putative	5E-013	10	gi|242018018	75.5	52	263	65	20	18	0	198	1	1	1	N	FOR	Pediculus humanus corporis	Aquaporin-4 OS=Mus musculus GN=Aqp4 PE=2 SV=2	1E-010	10	sp|P55088|AQP4_MOUSE	65.5	51	323	50	16	25	0	210
TI_asb-408	408	1	1	386		14	1	0	1	1	Unknown product	uk				386	162	ARSPTCDISEGPIFLYSSNTISVFTDVRYGVSFGHKKTSGFHSKQKKKGKPVCL	4	polyprotein	0.001	10	gi|297578409	44.3	96	2964	32	3	65	0	2626	82	1	1	N	FOR	Slow bee paralysis virus	30S ribosomal protein S11 OS=Synechococcus sp. GN=rpsK PE=3 SV=1	2.1	3	sp|Q2JL75|RS11_SYNJB	31.2	72	128	34	56	47	3	14
TI_asb-409	409	1	1	522		38	1	0	1	1	Cwf15/Cwc15 cell cycle control protein	uc	PFAM	7e-47	63.3	522	285	SSFGRLLKLCCSEDLCLFSLSLSSSSLLKSRALSSSAVPCPCSLNFNFVCPGRSLLEYCFDIALKSISPRPWPPRAGSNVGRAAVVIYIINMKQQ	5	pre-mRNA-splicing factor cwc15, putative	1E-020	10	gi|242007951	101	50	232	96	22	2	0	1	121	1	1	N	FOR	Pediculus humanus corporis	Protein CWC15 homolog OS=Drosophila melanogaster GN=c12.1 PE=1 SV=1	3E-019	10	sp|Q9V3B6|CWC15_DROME	94.7	50	259	88	19	6	0	1
TI_asb-410	410	1	1	396		30	1	0	1	1	low-density lipoprotein receptor Pediculus humanus corporis	st	NR-LIGHT	1e-42	2.7	396	393	CIFTSLGAVAPRLERAFMDGTERLVLIDQRILYPYGVTVDFPREHVYWVDTNLDYIERVDYDGKNRITIGKGFPVQNLFDITVFENTLYVTSLRNPSVISINKFNSSDYIAIATNLRAYYLHVYHRQRQPD	2	low-density lipoprotein receptor, putative	1E-042	10	gi|242018517	173	128	4603	64	3	46	0	214	2	11	2	N	FOR	Pediculus humanus corporis	Low-density lipoprotein receptor-related protein 1 OS=Gallus gallus GN=LRP1 PE=2	3E-028	10	sp|P98157|LRP1_CHICK	123	134	4543	45	3	73	6	341
TI_asb-412	412	2	2	806	771	49	1	1	0	0	Apolipoprotein D/Lipocalin	extmat	KOG	8e-08	78.5	806	651	QLRTLSAFAMLILKLIILAVLVYTTICPARNVGTRPIIPFKQGPCVPASVVMKNFEPVKFFTGIWYERSSFDNDLTEGDGICSGLKSKIVGDKVVILFYHFESFLLNKYTFIKGEANLTDTSIASFPLAVKYDTTSTQELPIRIIDTDYENYAILYSCRPVPGNSTLNDEMVWTFTRKRGDDTNDRVVDKILKSSTLDPAKFTRYGTMTCPADEPTL	3	Bombyrin	2E-008	10	gi|112983654	62.4	164	201	29	82	115	4	20	126	1	3	N	FOR	Bombyx mori	Apolipoprotein D OS=Macaca fascicularis GN=APOD PE=2 SV=1	1E-005	10	sp|Q8SPI0|APOD_MACFA	50.4	177	189	29	94	124	5	23
TI_asb-414	414	1	1	475		34	1	0	1	1	Alcohol dehydrogenase transcription factor Myb/SANT-like	tf	PFAM	2e-19	108.3	475	441	NVMATNPTSEFQVHKLIDLVRTNRCLYDPLDVNHNNRAVINSAWRAISYEMCQPESVCREKWINLRSNYARELRKTRRKIHEMEVYPKRKSLSQWAHYEALSFLSPFVKTRLDTVEKEADSRVGIKLGRMDSLDADPLTLTEVAEEV	2	CG3919	1E-007	10	gi|221331158	57.4	60	302	40	20	36	0	20	74	1	2	N	FOR	Drosophila melanogaster	Transcription factor Adf-1 OS=Drosophila melanogaster GN=Adf1 PE=1 SV=2	4E-004	10	sp|P05552|ADF1_DROME	43.9	109	262	22	42	84	0	25
TI_asb-415	415	1	1	476		49	1	0	1	1	conserved hypothetical protein Escherichia sp. 3_2_53FAA	uc	NR-LIGHT	1e-22	72.2	476	276	IHSQMRRTGGTETSQYPEEKKSTEIPPVAASERGAAQSQHQNLPQEKGLERPAIKGDSPVSEAVSVVSSKSRAGHVLSCLNMGGPSSKAKYS	3	conserved hypothetical protein	1E-022	10	gi|237702461	107	73	101	72	72	20	0	27	258	1	-1	N	REV	Escherichia sp. 3_2_53FAA	Nuclear receptor coactivator 2 OS=Homo sapiens GN=NCOA2 PE=1 SV=2	1.0	2	sp|Q15596|NCOA2_HUMAN	32.7	54	1464	38	4	33	4	597
TI_asb-416	416	1	1	567		38	1	0	1	1	Unknown product	uk				567	213	TVLYINKTQTTIITFFYLIYSITVYCFKQLTTRLVIQCSIVFPCMLPRQPRISHPNISPPLWRSYKNNNLI	5																			SET domain-containing protein C1709.13c OS=Schizosaccharomyces pombe	2.6	1	sp|O74738|YH9D_SCHPO	32	62	547	29	11	44	0	147
TI_asb-417	417	2	2	803	773	72	0	2	2	-2	Transport protein particle (TRAPP) complex subunit	pe	KOG	2e-57	100	803	486	FLNMIANHLLLELLHSELVSYVTNVENKEPGSKQGNLSTLEYFGFSTGFRMIERLTKEWPRFKDELDTVKFMCTDFWSSIYKKPIDNLRTNHQGVYVLQDNAFRFMNKISTGTQYLDVAPMYIAFTSGLLRGALANLGINCHVTAEVQSMPTCKFHIQVQRN	1	AGAP002385-PA	2E-055	10	gi|58383485	218	142	154	70	92	42	0	12	73	1	1	N	FOR	Anopheles gambiae str. PEST	Trafficking protein particle complex subunit 6B OS=Homo sapiens GN=TRAPPC6B PE=1	2E-039	10	sp|Q86SZ2|TPC6B_HUMAN	162	125	158	59	79	51	0	33
TI_asb-418	418	2	2	623		69	0	2	2	-2	60S acidic ribosomal protein P0	ps	KOG	2e-82	75.5	623	597	KNIPPNRGVGADNVGSKQIFQIRMSLRGIAVVLMGKNTMMRKAIRGHIERNQALEKLLPHIRGNVGFVFTRGDLPDVRDKLLENKVRAPARAGAIAPCPVIIPAQNTGLGPEKTSFFQALSIPTKISKGTIEIINDVHILKEGDKVGASEATLLNMLNISPFSYGLVVEMVYDSGTIFEPRILDVKPADLRVKIFGGSI	1	60S acidic ribosomal protein P0	2E-094	10	gi|263173401	345	190	320	91	59	17	0	16	6	2	1	Y	FOR	Cimex lectularius	60S acidic ribosomal protein P0 OS=Ceratitis capitata GN=RpLP0 PE=3 SV=1	2E-084	10	sp|Q9U3U0|RLA0_CERCA	311	189	317	83	60	31	0	30
TI_asb-419	419	1	1	1049	622	30	0	1	1	-1	Nuclear protein contains WD40 repeats	uc	KOG	0	5.6	1049	453	KQILLSIYSINIQKKKKKKKKKNMAGPPRPHPTFESKEIYARRPQFEVPLAKFPPLKGGQFKNPLGPAFFNPPRTGEKPPGVSPQLKSPLSKPHPPSFPPNGGEKKTKKRPPPPHTSPPPPPHKWVPPPPRERGGRKRKRKDIVKKKPAKK	3	Ras and Rab interactor 3	0.096	10	gi|297488222	40.4	73	1062	35	7	47	0	332	658	1	1	N	FOR	Bos taurus	WW domain-binding protein 11 OS=Homo sapiens GN=WBP11 PE=1 SV=1	0.062	10	sp|Q9Y2W2|WBP11_HUMAN	38.9	72	641	41	11	42	2	431
TI_asb-421	421	1	1	846	823	40	0	1	1	-1	Unknown product	uk				846	159	VFSDFITCLNDPDCVCIEKIIIYRFAIFNHLKSEEAIAIFLLLIKYSFIIFKM	4																			Uncharacterized protein PF07_0086 OS=Plasmodium falciparum (isolate 3D7)	7.1	1	sp|Q8IBP1|YPF16_PLAF7	31.6	50	3429	32	1	34	2	2037
TI_asb-422	422	1	1	811	783	45	0	1	1	-1	nonstructural protein precursor Triatoma virus	vir/	NR-LIGHT	0	13.4	811	723	FSMGKVLIQAIVIPFYVLSAVLAYNYLPFKAVSGFCLLICSLYFAEDVLCYMREILDLYITPQAQSGGIESLWFCTNVFNALLFRNFKLKSLSEFARFIAIVPRAIQGVDCIGELISKAFEFARISFYKYVLKSDVPITQESPVTKWSGEVQKYYMKYLESQLVYDEINFNLLGSLYQEGIVMLNSHIFVTARPLISRLLAIISSILMEFKNGGFSESTIRNPPVTIYISGNNGGSKNTLS	1	nonstructural protein precursor	1E-118	10	gi|20451029	427	241	1795	90	13	23	0	408	1	1	1	N	FOR	Triatoma virus	Glutamyl-tRNA reductase OS=Sulfurimonas denitrificans (strain ATCC 33889 / DSM	0.61	6	sp|Q30S94|HEM1_SULDN	35	69	432	31	16	47	2	338
TI_asb-423	423	3	3	732		81	3	0	3	3	Eukaryotic aspartyl protease	pm/protease	PFAM	4e-60	48.4	732	687	WLEVNQSSVNMKLSLLILFFIGTFVSNNGNLRVPLQKIYNEPRDFNEFMETATISQARYLLLQKSGVKHMLQKRLNSAYYGEISLGTPPQNFTVVFDTGSSDLWVPSISCFFSIACVNHRKYNRRQSTTYLKDGRSLKIVYGTGDVEGFLSTDTLTINSLNVVNQTFGEVYAESKKPFKNAKYDGILGLGYPSIATDNIAPPHYNMLDQGLIDSPVFSFYLNRNRSETY	2	cathepsin D	5E-050	10	gi|301030231	199	219	390	47	56	115	3	3	77	1	2	N	FOR	Triatoma infestans	Lysosomal aspartic protease OS=Aedes aegypti GN=AAEL006169 PE=1 SV=2	2E-045	10	sp|Q03168|ASPP_AEDAE	182	198	387	49	51	100	2	21
TI_asb-424	424	5	5	607	575	91	1	4	3	-3	Unknown product	uk				607	357	ITFLTQHNFYPNKKMRTVLCLLAALTTVMAAHESIVCPPDFCNTVQCSAELTEESCDGEFFPNSSFCECCPTCITYIKPGGYCNEALHKIFSALYLRVHRCSPGYHCVRNICIPKNNFI	2	hypothetical protein	0.021	10	gi|189240937	41.2	83	104	28	80	59	0	22	119	1	2	N	FOR	Tribolium castaneum	Fungal protease inhibitor-1 OS=Antheraea mylitta GN=fpi-1 PE=1 SV=1	0.27	10	sp|B0JFB8|FPI1_ANTMY	35.4	84	105	21	80	66	6	21
TI_asb-425	425	6	6	794	772	82	3	3	0	0	Nuclear protein contains WD40 repeats	uc	KOG	0	4.2	794	633	NIISTIMKHFLILLSALVLAQGLKQNEAISSHDAEELLGPLLNEYFELKNLIEEVKQYQGTQKISSLVLAEKIARVPPHCLPIDTPFIEAWDSDACNNLTESLQKAASLAQQIGNWAYQAGLNLWAKFSDLFQCGNVNPLTAFKCVVNDINELKKVIESYKPRALAYKKEIVALAKELKVEFKQCLGVQKEAQAIAEQVVVQAQLCDNTKL	2	late embryogenesis abundant domain-containing protein, putative	3.3	7	gi|221485238	34.7	63	517	33	12	42	0	431	269	1	2	N	FOR	Toxoplasma gondii GT1	Formin-A OS=Dictyostelium discoideum GN=forA PE=1 SV=1	3.8	10	sp|Q54WH2|FORA_DICDI	32.3	59	1218	32	5	40	3	595
TI_asb-426	426	4	4	850	520	58	2	2	0	0	capsid protein precursor Triatoma virus	vir/	NR-LIGHT	7e-26	7.3	850	219	PLMPNVMYKITLYSSNILLGHSAADLFRFGFLLGAPLAISATALRDNFTGSSATVSLPTFSNFYLSSTSESTT	3	capsid protein precursor	7E-026	9	gi|20451030	120	64	868	95	7	3	0	796	3	1	3	N	FOR	Triatoma virus	Undecaprenyl-diphosphatase OS=Synechococcus sp. (strain CC9311) GN=uppP PE=3	0.100	10	sp|Q0I740|UPPP_SYNS3	37.7	61	283	39	22	37	2	173
TI_asb-427	427	2	2	531	503	62	2	0	2	2	hypothetical protein Schistosoma mansoni	uc	NR-LIGHT	2e-12	39.1	531	342	ERSANGSTHDANIDYKAHVASWTPFTTDRTCRDMPVTPTGGEPTARHAEPTTSFLTATTLIYAIGAGITAAAGTRLALQWILVKGFKVYSFRLRGLNRVPYRYFLSLPPRAGSG	5	hypothetical protein	2E-012	10	gi|256050212	73.9	45	115	77	39	10	0	10	91	1	1	N	FOR	Schistosoma mansoni
TI_asb-428	428	1	1	535	502	22	1	0	1	1	Ribosomal protein L11 - mitotic spindle organization - mitotic spindle elongation - lipid particle - protein binding - ribosome - cytosolic large	ps	GO	2e-11	25	535	264	YSLLELELPWLLAPDLPSNGSLLKDLKCTHSDYGASIESCIVIFCHYLPVPGVGNLRACCLPWDVVAVSQAPSPESKGDSPLPVRAHG	6	hypothetical protein	2E-019	10	gi|256050212	97.1	66	115	74	57	17	0	7	86	1	2	N	FOR	Schistosoma mansoni	60S ribosomal protein L11 OS=Drosophila melanogaster GN=RpL11 PE=1 SV=2	6E-011	10	sp|P46222|RL11_DROME	67	46	184	69	25	14	0	139
TI_asb-429	429	5	5	730	674	84	2	3	1	-1	Cytochrome C oxidase subunit II	met/energy	PFAM	8e-58	100	730	273	PIDLIVRTGLLISSIRYKIRSLGKAMNTRIIAGRIVQINSMVWPSRRYRLVSLFMSTVPIMYPTRTVIVVRIIKVWSWKKLERAIRGELAS	4	cytochrome oxidase subunit 2	4E-091	10	gi|149689096	336	214	223	81	96	39	0	5	3	1	3	N	FOR	Triatoma infestans	Cytochrome c oxidase subunit 2 OS=Anopheles quadrimaculatus GN=COXII PE=3 SV=1	4E-077	10	sp|P33505|COX2_ANOQU	287	213	228	65	93	73	0	8
TI_asb-430	430	5	5	1189	1156	69	4	1	3	3	capsid protein precursor Triatoma virus	vir/	NR-LIGHT	0	43.6	1189	1182	RIXXXFKYSSTSLPKQVLWTSPVHPQIIRNHVTVVDAPGQPTLLAYATGFFKYWRGGLVYTFRFVKTNYHSGRVQITFHPFVGYDDVMDSDGKIVRDEYVYRVVVDLRDQTEATLVVPFTSLTPYKVCADVFNSANRPEYNYEPRDFKVYDNTTDQFFTGTLCVSALTPLVSSSAVVSSTIDVLVEVKASDDFEVAVPNTPLWLPVDSLTERPSLDGVPIAQVGFASAGTRDIRSSYVEGKFIPQDITGMSRNHELDEQPSQECIGERILSFSELIKRNSWRYVSDEKSLIYPAYAFDNPAAMYTAADKLPVWTLTPRSGFPTLLTSIGAMYVFYRGGIRLKIVPGVADQPKPLVEVALFTMQDQGYIIKANDYSTDFCSSNIYXKKKKKKKKN	3	capsid protein precursor	0.0	10	gi|20451030	733	379	868	95	44	17	0	381	18	1	3	N	FOR	Triatoma virus	Structural polyprotein OS=Cricket paralysis virus PE=1 SV=2	1E-020	10	sp|P13418|POLS_CRPV	101	365	895	26	41	268	21	409
TI_asb-431	431	4	4	597	565	61	0	4	4	-4	Ubiquitin/40S ribosomal protein S27a fusion	ps	KOG	2e-52	73	597	438	VHRSTEMQILPLTLTGKTITLEVESSDTIENVKAKIQDKEGIPPDQQRLIFAGKQLEDNRTLSDYNIQKESTLHLVLRLRGGAKKRKKKNYSTPKKIKHKKKKIKLAVLKYYKVDENGKINFFKKKRQFKYFFCWGIYGLQLKKLN	2	ubiquitin	4E-032	10	gi|170575532	139	120	193	64	62	43	0	26	14	1	2	N	FOR	Brugia malayi	Ubiquitin-40S ribosomal protein S27a OS=Spodoptera frugiperda PE=2 SV=2	3E-032	10	sp|P68203|RS27A_SPOFR	138	115	156	66	74	39	0	1
TI_asb-432	432	3	3	634	609	72	2	1	1	1	truncated cytochrome b	met/energy	NR-LIGHT	8e-72	50	634	210	LTRFFALHFLLPFPLIALTIIHLLFLHQTGSSNPLGLTRNFDKIPFHPYYSIKDLIGVSITLIFFILLNL	1	truncated cytochrome b	8E-072	10	gi|149898868	271	184	368	75	50	45	0	185	55	1	1	N	FOR	Triatoma infestans	Cytochrome b OS=Drosophila yakuba GN=mt:Cyt-b PE=3 SV=1	3E-056	10	sp|P07704|CYB_DROYA	218	183	378	56	48	79	0	194
TI_asb-433	433	2	2	754		51	0	2	2	-2	ACYPI005242	uc	NR-LIGHT	3e-15	57.7	754	375	XXXKKKXXFILLGKSVYHLKITRRESQREIIVMSRTVLLLLVISVCSLVGCVAEPDIIQHSRAKRLTAFAKPASPSQPPIVGKGKECKSDRECEVIPYTTCTIDVRDQRRRCICKDGNPPANGQC	1	ACYPI005242	3E-015	10	gi|239792914	84.3	116	201	33	58	77	0	87	295	1	1	N	FOR	Acyrthosiphon pisum	Neurogenic locus notch homolog protein 4 OS=Mus musculus GN=Notch4 PE=1 SV=2	0.14	10	sp|P31695|NOTC4_MOUSE	37	86	1964	26	4	63	0	187
TI_asb-434	434	2	2	525	491	64	2	0	2	2	Knottins	imm	CDD	6e-05	95.5	525	321	TCSSTTSTKYFSPPPRCALSLITLFLAPALAYSHPAEWTEQQLDESLWEPAGEVTEEHVARLKRATCDLFSFQSKWVTPNHAACAAHCLLRGNRGGQCKGTICHCRK	1	defensin 4	2E-047	10	gi|197281888	190	92	93	92	99	7	0	2	46	1	1	N	FOR	Triatoma brasiliensis	Defensin OS=Pyrrhocoris apterus PE=1 SV=1	3E-015	10	sp|P37364|DEFI_PYRAP	81.3	43	43	69	100	13	0	1
TI_asb-435	435	2	2	741		69	0	2	2	-2	Unknown product	uk				741	303	YSITPKLIGLGYYSYSNFIKINIYIIPVSKKVDVFNAANSVDNMLWEPDLVKSTVRRNRKNKSVFHTKNCSFCRLIHPVTNYTIWKQMGILHSFTHFGNAF	4	hypothetical protein	1.7	4	gi|82540149	35.4	130	457	25	28	97	10	163	55	1	-1	N	REV	Plasmodium yoelii yoelii	FACT complex subunit SPT16 OS=Dictyostelium discoideum GN=spt16 PE=3 SV=1	9.9	1	sp|Q54S43|SPT16_DICDI	30.8	51	1072	31	5	35	3	90
TI_asb-437	437	1	1	490	445	40	0	1	1	-1	Unknown product	uk				490	279	KKPCKSDVSQPPYVTPSAPSTTSTIILSTPTPAPIKPECDKENDKRGVKNDCHRYQVCKGGKWIDEKCSVWGKFDIITKECFYFQTWKAKCEQ	1	hypothetical protein AND_13361	1.1	10	gi|312375952	34.7	31	1086	45	3	17	0	692	151	2	1	N	FOR	Anopheles darlingi
TI_asb-438	438	1	1	588	541	53	1	0	1	1	COX2 cytochrome c oxidase subunit II; Provisional	met/energy	PRK	5e-76	68.7	588	219	PNSNPGRLIIILPWLSRPGVASILIPRLGIVHEWITSAAVTKMRICLFIGKITRLSTSNSRKSLISKSLEGFI	4	cytochrome oxidase subunit 2	1E-076	10	gi|149689096	281	161	223	89	72	17	0	46	3	2	2	Y	FOR	Triatoma infestans	Cytochrome c oxidase subunit 2 OS=Anopheles quadrimaculatus GN=COXII PE=3 SV=1	2E-062	10	sp|P33505|COX2_ANOQU	237	160	228	70	70	48	0	49
TI_asb-439	439	3	3	869	488	43	2	1	1	1	nonstructural protein precursor Triatoma virus	vir/	NR-LIGHT	4e-77	8.9	869	618	GLTSRFEDLENEEVVAQVGYLPGDDSKSKVRYLSGAIPSLIESHVFDWNKRWNNLIEKYPFLPSMKVIGGVMGLLAVGLGISTMFWKKTEKKESHVVSFSESCEKVEQRPVVKCESCEKDTQRPTVRCETSTLDMKVDNQPCDEFLTKSQGVLDLNASEVLGKKKKKKKKKKFLAPPAPFIFKFNQFFFCAPIWPPFAHSPLLGGI	3	nonstructural protein precursor	4E-077	10	gi|20451029	290	161	1795	89	9	17	0	841	6	1	3	N	FOR	Triatoma virus	Protein prune homolog 2 OS=Homo sapiens GN=PRUNE2 PE=1 SV=3	3.4	2	sp|Q8WUY3|PRUN2_HUMAN	32.7	78	3088	26	3	57	3	2495
TI_asb-440	440	1	1	745		52	0	1	1	-1	alpha-glucosidase Culex quinquefasciatus	met/carb	NR-LIGHT	2e-43	21.9	745	402	VPKSYLPPNNWVSLYGGSAWKYNTERQQFYLHQFREFQPDLNLRNPKVVDEIKNVMRYWLDIGVDGFRVDAVPYLVEDASLNPEDQIKGCNDINNYNCFTHYKTKDVDETYKILEELGKVFDEINIRINQENFS	2	similar to GA13362-PA	3E-046	10	gi|193709215	127	129	621	48	21	67	5	131	1	3	2	Y	FOR	Acyrthosiphon pisum	Probable maltase OS=Aedes aegypti GN=MAL1 PE=2 SV=1	5E-043	10	sp|P13080|MALT_AEDAE	131	122	579	50	21	60	4	118
TI_asb-441	441	1	1	773	727	58	1	0	1	1	20S proteasome regulatory subunit alpha type PSMA1/PRE5	prot	KOG	6e-53	74.6	773	636	GMSISGLTAGARILTLHMRTECLSYLYSNRTQIPVIRLMNKITNMMQHSTQRYDRRPFGVGLLVAGYDNDGPHIFQICPSAIMYGCRAMAIGSRSQSARTYLEKHLDEIGICPNEADLIKHALRALRDSSPNDIELNNKNVAVAIVGKNTPLKELTEEEAQDYLNMVLSEERRTGGTSGGTGPGGSSDSGSRPADDGQPSQDPAPQVAMDTQ	2	proteasome subunit alpha type, putative	1E-052	10	gi|242003283	208	171	293	59	58	69	0	84	2	1	2	N	FOR	Pediculus humanus corporis	Proteasome subunit alpha type-1 OS=Dictyostelium discoideum GN=psmA1 PE=3 SV=1	6E-043	10	sp|Q27562|PSA1_DICDI	174	172	248	53	69	80	1	71
TI_asb-445	445	3	3	577	544	81	2	1	1	1	nonstructural protein precursor Triatoma virus	vir/	NR-LIGHT	7e-63	6.6	577	360	EIDVPIRSLDEHSKLKRSFVLDEERQQWIAPLTLDTVLETPSWIHRCDDPIEATVSNIEFALRELSLHSKQEWEKYAPVMLSEVTRLGRTTIFHDWADTRAFVLDDLSPDEIWNPTDLTM	2	nonstructural protein precursor	7E-063	10	gi|20451029	241	120	1795	97	7	3	0	1676	2	1	2	N	FOR	Triatoma virus	Replicase polyprotein OS=Drosophila C virus (strain EB) GN=ORF1 PE=4 SV=1	4E-008	10	sp|O36966|POLN_DCVEB	58.2	79	1759	37	4	49	0	1648
TI_asb-446	446	1	1	428		43	0	1	1	-1	Unknown product	uk				428	120	FYFDVNFVXGLIKLLYLYIFIEIRRVRVVVLFNVLKLLII	1
TI_asb-447	447	2	2	659		75	0	2	2	-2	Triosephosphate isomerase	met/carb	KOG	9e-73	69.6	659	633	KFPLEFRLLSPIAKSILTLTFYLILGVGVIKNNSTCSNMRKFYVGGNWKMNGSKKDVEALICNLSNADLDPATEIMVGVPSIYLDYVKKLLPKNIQLSAQNCYKVPNGAFTGEISPAMIKDVGGCWVILGHSERRHIYGESDQLVAEKVCHALSEGLCVVACVGEKIEERECGLTEEVVYRQTKAIADYVTDWSKVVIAYEPVWAIGTGKT	1	triosephosphate isomerase	3E-067	10	gi|45382061	256	172	248	68	69	54	0	4	142	1	1	N	FOR	Gallus gallus	Triosephosphate isomerase OS=Gallus gallus GN=TPI1 PE=1 SV=2	7E-068	10	sp|P00940|TPIS_CHICK	256	172	248	68	69	54	0	4
TI_asb-448	448	2	2	876	762	62	1	1	0	0	Unknown product	uk				876	693	IKMKLITLFLFIGPSFGVDIITKDIGESAWDEIIDQSIETARSAIIDNHLDLIHLPNLNQEFHKKVIGIPFYASVKIPDAEIWDISSVNRRGPVTLQQDDTTGNITLSTSLGLEKLVLNCNKLYLYLLGITVSGSMNIDCSSNEIEISLSLITDKESRCKAHINWARVTKFQDFTIQIAPSNVSNWLAKHIISFILNKFPSKITGIINFRLADELNAGIGNIDVCSYLHFR	2	aldehyde dehydrogenase 2, like	6.8	8	gi|292614411	33.9	46	516	34	9	30	2	326	74	1	2	N	FOR	Danio rerio	Actin-related protein 9 OS=Oryza sativa subsp. japonica GN=ARP9 PE=2 SV=1	0.23	5	sp|Q0JF03|ARP9_ORYSJ	36.6	118	586	26	20	87	14	123
TI_asb-449	449	2	2	537		55	2	0	2	2	Aldo/keto reductase family	tr	PFAM	4e-46	49.4	537	447	GLSNFNSQQIQEILDMASIKPVNVQVECHPYLNQTKLYKFCEANGITLTAYSPLGSPARPGAKPDDLILLKDPKLKELGDKYNKTPAQILIRYQIERDIIVIPKSVNKERIQSNFDSLSFTLSKDDMKILDGLDRQDGRMLKLENIADH	3	similar to AGAP011050-PA	2E-040	10	gi|193601268	166	158	320	54	49	72	0	164	3	1	3	N	FOR	Acyrthosiphon pisum	Aldose reductase OS=Bos taurus GN=AKR1B1 PE=1 SV=1	2E-034	10	sp|P16116|ALDR_BOVIN	144	160	315	48	51	83	2	157
TI_asb-450	450	2	2	646	613	67	0	2	2	-2	ribosomal protein L35Ae Tribolium castaneum	ps	NR-LIGHT	5e-48	79.7	646	513	ANMTEKAAKVTTTKTQPAKVKTEKKAKEKPAPSAASTTKSVEKPVEAKKPKKPQRMIRKRHGRLYAKAVFTGYKRGLRNQHENTALLSIEGCKSKSDSWFYVGKKCVFVYKAKNRTRAPGLSKNKTKVRAIWGKVTRPHGSSGAVRAKFKSNLPPTAMGRRIRIMLYPSKI	3	similar to ribosomal protein L35Ae	5E-048	10	gi|91094995	192	114	143	81	80	21	1	30	240	1	3	N	FOR	Tribolium castaneum	60S ribosomal protein L35a OS=Pongo abelii GN=RPL35A PE=3 SV=1	4E-036	10	sp|Q5R8K6|RL35A_PONAB	151	110	110	65	100	38	0	3
TI_asb-453	453	1	1	446		51	1	0	1	1	Unknown product	uk				446	261	TRSFNRPEGHPRGDHVKNHLCRLSLRSKLGFRPEGLSGVCEASPKRNTLKKAGRLAGRTLVPNFTGGYPAVGFERATSRSRVGRPNR	6	transcription factor HIVEP3	0.40	10	gi|124107625	35.8	74	2348	31	3	51	1	51	56	1	2	N	FOR	synthetic construct	Transcription factor HIVEP3 OS=Mus musculus GN=Hivep3 PE=1 SV=1	0.10	10	sp|A2A884|ZEP3_MOUSE	35.8	74	2348	31	3	51	1	51
TI_asb-454	454	1	1	977	936	29	0	1	1	-1	Unknown product	uk				977	273	RKKNYLAFKLGGGKERGWGKVIKFFFDFKGGKNFIFLGLKKFKIFFWGEKKKTPKRNLLRFLKFFKKKFWGGDYFFFFKKKKKKKIFVFWG	3
TI_asb-455	455	2	2	856		53	1	1	0	0	Nuclear protein contains WD40 repeats	uc	KOG	0	6	856	201	IHIYWIDVLVLVFAAFYFIYVFAAFYFSLCGFLFYLSLRFFKNVCTYHRKINHLHLMTKPFHIYFSC	5	10 kDa putative secreted protein	1E-009	5	gi|114153154	66.2	36	102	80	35	7	0	9	379	1	1	N	FOR	Argas monolakensis
TI_asb-456	456	1	1	856	204	32	1	0	1	1	Nuclear protein contains WD40 repeats	uc	KOG	0	6	856	207	VGHLHHYWLEKSSILYFILSSIETSLKKVKSFLLNSYFIKHNYSSFLFFFSKHPKLVFLTYCFLFSRRM	4																			Maturase K OS=Aethionema cordifolium GN=matK PE=3 SV=1	5.6	2	sp|A4QJ97|MATK_AETCO	32	55	503	34	11	36	4	89
TI_asb-457	457	4	4	624	560	85	2	2	0	0	fatty acid-binding lipocalin	met/lipd	NR-LIGHT	7e-44	100	624	390	FAGIKYKLNKSENFDEYMKALGVGLVTRKMGNTVSPVIELLEEDGEYTLKSSSTFKNTVIKFKLGEEFDQETPDGRKVKATITLEGDNKLVEVQKGEKETTLIREFSKDEVKMTLTVDDIVCTRIYKVIE	3	fatty acid-binding lipocalin	7E-044	10	gi|263173263	179	109	109	77	100	24	0	1	153	1	3	N	FOR	Cimex lectularius	Fatty acid-binding protein, muscle OS=Schistocerca gregaria PE=1 SV=2	2E-036	10	sp|P41496|FABPM_SCHGR	152	132	134	59	99	53	1	1
TI_asb-458	458	10	10	1232		83	7	3	4	4	Actin	cs	KOG	0	101.3	1232	1140	PTDNMCDEEVAALVVDNGSGMCKAGFAGDDAPRAVFPSIVGRPRHQGVMVGMGQKDSYVGDEAQSKRGILTLKYPIEHGIVTNWDDMEKIWHHTFYNELRVAPEEHPVLLTEAPLNPKANREKMTQIMFETFNTPAMYVAIQAVLSLYASGRTTGIVLDSGDGVSHTVPIYEGYALPHAILRLDLAGRDLTDYLMKILTERGYSFTTTAEREIVRDIKEKLCYVALDFEQEMATAASSSSLGKSYELPDGQVITIGNERFRCPEALFQPSFLGMEACGIHETTYNSIMKCDVDIRKDLYANTVLSGGTTMYPGIADRMQKEITALAPSTMKIKIIAPPERKYSVWIGGSILASLSTFQQMWISKQEYDESGPSIVHRKCF	2	actin 5C, isoform B	0.0	10	gi|17530805	759	376	376	99	100	1	0	1	74	1	2	N	FOR	Solenopsis invicta	Actin-5C OS=Anopheles gambiae GN=Act5C PE=2 SV=1	0.0	10	sp|P84185|ACT5C_ANOGA	759	376	376	99	100	1	0	1
TI_asb-459	459	1	1	489		24	1	0	1	1	Unknown product	uk				489	213	XTXXYLFISNYFLFKLKXIIKYFKNKIYXIIYLXXHFISLXYFFIIITNXLSISKKFLFSXNLHLINKXFT	6
TI_asb-460	460	1	1	328	253	48	1	0	1	1	Unknown product	uk				328	327	RPLRTGCHARVAQGPPDQRTERGPAQLLDAFDHDHDDTCCRCSGRLLSVLQRRRLNALTATTLAEHSRNETDKGIKHRQSGGPXKKKKKKKKKNFLGPLAPFIFKFKKF	1	hypothetical protein AND_19389	7.6	2	gi|312372995	31.6	30	491	40	6	18	0	413	28	1	1	N	FOR	Anopheles darlingi
TI_asb-461	461	1	1	375		48	1	0	1	1	COMM domain containing 7 - NF-kappaB binding - tumor necrosis factor-mediated signaling pathway - negative regulation of NF-kappaB transcription	imm	GO	9e-13	34	375	225	KKIIVMTCEISDIDWQFGVVAASSEETLVGKTFVQIKLTVNNGAKVERLNLELSVQQFYSLLHDLEKARTKMEYT	2	hypothetical protein BRAFLDRAFT_108193	1E-014	10	gi|260822352	80.5	70	202	50	35	35	0	131	50	1	2	N	FOR	Branchiostoma floridae	COMM domain-containing protein 7 OS=Mus musculus GN=Commd7 PE=2 SV=1	3E-012	9	sp|Q8BG94|COMD7_MOUSE	70.5	69	200	44	35	38	0	129
TI_asb-462	462	1	1	487	468	17	1	0	1	1	Unknown product	uk				487	276	ISFKKKKNNPLKKPPPQILPLCVAPGFFSLPIYFRVFCLNLNRPQLTDYRENVHGGMTEPRKYKRKARHTLNPGFLQTQNYGSTFNSIYNSR	1	conserved hypothetical protein	0.84	1	gi|221485776	35	51	445	31	11	35	1	368	70	1	-2	N	REV	Toxoplasma gondii GT1	Pesticidal crystal protein cry27Aa OS=Bacillus thuringiensis subsp. higo	9.2	1	sp|Q9S597|C27AA_BACUH	29.6	55	826	27	7	40	6	719
TI_asb-464	464	5	5	530	404	78	0	5	5	-5	Unknown product	uk				530	213	PPLGGNAQKSPNWGPQKKLPRAKNPRGRGAPKVFFFFFFFFFEYFLFFCDFHFILLFFFFEGFFLIFFFFS	5	Tm227 salivary lipocalin	1.9	2	gi|307094904	34.3	20	224	70	9	6	0	205	437	1	2	N	FOR	Triatoma matogrossensis
TI_asb-465	465	3	3	598		73	1	2	1	-1	Unknown product	uk				598	354	PPYHQIVYQLIHQFWKPRTRMLVRLWRKKYKRVWILVKKITDWALKTGLTILKEIYHLIHCGNINPITAMKCVVQKINDIKAFIGANKPIALEYKDEIVTLAKELGLALKQCLGAQKK	2	hypothetical protein	3.2	6	gi|115709019	33.9	81	532	27	15	59	3	41	64	1	1	N	FOR	Strongylocentrotus purpuratus	Structural protein V8 OS=Sputnik virophage PE=1 SV=1	0.78	10	sp|B4YNE8|V8_SPTNK	33.9	45	184	28	24	32	0	85
TI_asb-466	466	3	3	696	569	81	0	3	3	-3	DNA-directed RNA polymerase I subunit RPA34	tm	PFAM	4e-14	22.9	696	342	SVVSWFYSEIMASLLWMDSVWQTLVLEERQHPYLLAFAIIIILSFLISLLCNLCACCWTLCCTKSPRYNFINPSKANNYGTIQPIKQPGEKSYPYNPAIASSSGQNDKGLVKTV	3	agip65	2.6	1	gi|209170949	34.7	30	194	50	15	15	0	72	304	1	1	N	FOR	Agrotis ipsilon multiple nucleopolyhedrovirus
TI_asb-467	467	1	1	495		45	1	0	1	1	Box H/ACA snoRNP component involved in ribosomal RNA pseudouridinylation	ps	KOG	8e-28	72.5	495	438	FVNMPKTKRSETNDTYDEDSFSGRGTKKAKKAKVDDDAAHAARDSMDGSARAHENGDVDSLTYEEKLAFVNPISKPMASKKFTKKLFKLAKKASKHKGHVYCGLKVVQTMIRKGQTGVVLLAGDVFPIDISCHIPAVCEEKGLPYI	2	box H/ACA snoRNP, putative	4E-024	10	gi|241855547	112	143	187	44	76	79	0	1	65	1	2	N	FOR	Ixodes scapularis	H/ACA ribonucleoprotein complex subunit 2-like protein OS=Drosophila yakuba	5E-017	10	sp|Q6XIP0|NHP2_DROYA	87	94	160	46	59	50	3	19
TI_asb-468	468	2	2	796	764	52	0	2	2	-2	hypothetical protein	uc	NR-LIGHT	3e-24	82	796	306	FTMADDGMDLCGAIWNHEMAMRRLLSLLRQSQHTRTDTQCFQPSNPTQGDSGLMLMMCWMALALVLYLLRPATIRNKENNLKPRDNGSGDGGNPPPTTPNAF	3	hypothetical protein	3E-024	10	gi|149898849	114	82	100	68	82	26	0	1	135	1	3	N	FOR	Triatoma infestans	Uncharacterized protein C4orf34 homolog OS=Rattus norvegicus PE=2 SV=1	0.76	5	sp|Q498C7|CD034_RAT	34.7	84	99	29	85	59	3	1
TI_asb-469	469	4	4	625		82	1	3	2	-2	Apolipoprotein D/Lipocalin	extmat	KOG	1e-09	76.3	625	603	FEDKNRRMSSKLVLISLFVCVLSLSQASIFDNKKFGSGPYLPWKVGRCLVPSVQEQFQTAKFFTGHWYELASFGNYLFLFKGICPTFEFNVTDSGEIEVLHYLYEKVLWKYDSVQGNSYTYFIKNNQGYLPITYPVLGGPATIDVPTFIVGTDYENWAVVYSCEQKLVLKAEMSWILTRTRNSTIQKQILETLEKNHLNYN	3	AGAP009281-PA	2E-010	10	gi|158300081	68.2	142	193	29	74	100	1	33	153	1	3	N	FOR	Anopheles gambiae str. PEST	Apolipoprotein D OS=Macaca fascicularis GN=APOD PE=2 SV=1	1E-009	10	sp|Q8SPI0|APOD_MACFA	63.2	158	189	27	84	114	10	15
TI_asb-473	473	1	1	697	680	46	0	1	1	-1	Actin depolymerizing factor	cs	KOG	5e-35	75.3	697	333	DVEFVGDRNAAYDQPLEDLQKGGTGECRYGLFDFEYTHQCQGTSEASKKQKLFLMSWCPDTAKVKKKMLYSSSFDALKKSLVGVQKYIQATDLSEASQEAVEEKLRATDRQ	2	conserved hypothetical protein	2E-055	10	gi|242008321	217	111	152	95	73	5	0	42	2	1	2	N	FOR	Pediculus humanus corporis	Cofilin/actin-depolymerizing factor homolog OS=Drosophila melanogaster GN=tsr	8E-052	10	sp|P45594|CADF_DROME	203	111	148	90	75	10	0	38
TI_asb-474	474	4	4	774		86	4	0	4	4	Nuclear protein contains WD40 repeats	uc	KOG	0	3	774	618	FLDSSQSVEELHFKEQPLSKMSLLPILFNDVWDDYRRPFRADIYDQSFGMGLLNEEIQRARDALLSVPLRSRYFRPWRSLSVEDSGVSALHSDKNEFRVNLDVQQFKPEELNVKINDGFIVVNGKHEERTDQHGYISRQFTRRYKIPEEVDANAFVSNLSTDGVLSIFAPKKSIKEGADRVIPITQTNVPAVKKSDEKVIEVSKQE	1	protein lethal, putative	2E-049	10	gi|242005722	197	178	211	56	84	78	1	23	61	1	1	N	FOR	Pediculus humanus corporis	Protein lethal(2)essential for life OS=Drosophila melanogaster GN=l(2)efl PE=1	4E-037	10	sp|P82147|L2EFL_DROME	155	187	187	43	100	105	4	1
TI_asb-478	478	1	1	674		45	0	1	1	-1	Unknown product	uk				674	345	CIFHHLLAQQAHVAALGLFNNYLPLHLNFSVRYAYIEVPHIFSHAVPPPLGRTPSGDPSYPFLRSSCPPFCGQTTLAAALLQYVYEVILISSYASPYDFCCHVPLNVLLGIANFM	2	conserved hypothetical protein	7.2	3	gi|221488229	33.1	31	1739	41	2	18	0	349	350	1	2	N	FOR	Toxoplasma gondii VEG	Zinc finger homeobox protein 2 OS=Homo sapiens GN=ZFHX2 PE=2 SV=3	3.7	1	sp|Q9C0A1|ZFHX2_HUMAN	32	30	2572	56	1	13	0	1640
TI_asb-482	482	1	1	712		34	1	0	1	1	cathepsin D	pm	NR-LIGHT	2e-43	38.2	712	414	EMDNVSVEAENKSIWCQHGCSAVADTGSSLITGPFDDVLEIIASTGAEIHNGVGFVPCDGIHKLRPITFHFNGRGYTLNPEDYMVKMTIKDETACTVGLAMMPLHTKNPFWILGNVFLGKFYTVFNVEKETVSFATLK	2	cathepsin D	2E-043	10	gi|301030231	177	149	390	55	38	66	0	242	56	1	2	N	FOR	Triatoma infestans	Cathepsin D OS=Homo sapiens GN=CTSD PE=1 SV=1	6E-022	10	sp|P07339|CATD_HUMAN	104	131	412	39	32	79	2	277
TI_asb-485	485	1	1	815	785	38	0	1	1	-1	Unknown product	uk				815	261	FCFKKFNDKYGNNFIKILNKFFFFFSCDKAIIYRYRQQYHHYTIITVEVPMARKIYGQHCWTLTPEYPRTKSNVLPNPGAIPVPLYY	4																			Tetratricopeptide repeat protein 21 homolog OS=Caenorhabditis elegans	3.0	1	sp|Q20255|TTC21_CAEEL	32.7	54	1332	29	4	38	2	1212
TI_asb-486	486	1	1	743	720	39	0	1	1	-1	Unknown product	uk				743	174	VRTISDFEKCRLYFNKRGIFLLNFTVFLSVFSRDAILDNRLPFKFIYIEEYKYFLTKT	4	hypothetical protein C06E7.1	5.1	1	gi|32565909	33.9	46	173	36	27	29	0	110	178	1	1	N	FOR	Caenorhabditis elegans	UDP-N-acetylmuramoyl-L-alanyl-D-glutamate--2, 6-diaminopimelate ligase	4.4	1	sp|Q8D2Z1|MURE_WIGBR	32	52	496	30	10	36	0	51
TI_asb-487	487	1	1	604	586	44	0	1	1	-1	Serpentine type 7TM GPCR chemoreceptor Srz	st	PFAM	5e-08	61.2	604	201	NCFKKIFSSNSSFFFFFFFFNIKLLFFCFCYFFFVFLNYHFSLVFVILLFFCFSFPVAEQCNFNFFF	5	hypothetical protein	1.1	4	gi|68073591	35.4	44	1608	40	3	26	0	699	225	1	-3	N	REV	Plasmodium berghei
TI_asb-488	488	2	2	312	288	48	1	1	0	0	Unknown product	uk				312	138	GCWCIGYEHGLVSGRTPVRVQRITKFYICLKYVNSKVGASAPVHDT	1																			Hemagglutinin glycoprotein OS=Rinderpest virus (strain L) GN=H PE=3 SV=1	3.5	1	sp|P09460|HEMA_RINDL	30.4	61	609	37	10	38	2	99
TI_asb-489	489	2	2	163	135	72	0	2	2	-2	Unknown product	uk				163	159	CLPLSAVALGGEWCIRIVCAYTLGVSFCICIIFIKFILLNLLQHQKKKKKKKK	2
TI_asb-490	490	2	5	460	427	86	0	2	2	-2	Knottins	imm	CDD	1e-05	95.5	460	318	KLFEYPFYPANIMKCALSLVTLFLVAALAYSYPADLAQQPLDEAQWEQPAGEITEEHAARLKRATCDLFSFSSKWFTPNHAACAAHCILLGNRGGHCVGTVCHCRK	2	defensin	1E-050	10	gi|89112752	200	94	94	98	100	1	0	1	86	1	2	N	FOR	Triatoma infestans	Defensin OS=Pyrrhocoris apterus PE=1 SV=1	1E-012	10	sp|P37364|DEFI_PYRAP	72.4	43	43	62	100	16	0	1
TI_asb-493	493	1	1	987	730	32	0	1	1	-1	Dual oxidase maturation factor	uc	PFAM	4e-78	75	987	675	SKSSRDHCCCTLHRAGXSWXVXNXSPFRGYSAFSKELLSAELGTYIGLAHVILTLLSDNNTEIDFNERFTWRGSGEMGESYKAGLERGLPFPILTVAEYFTLGQEGFTWGGNYRHAGYYASILLWTAFASWLVMNLLLVVVPRYGACAMVLTGCLMLASTLAYHCLLPVRPLTVRFEDTVLTFRFGWCFWLVIVAGALCILVGLNNLVIDLIYPNRFSTILEIEL	1	similar to moladietz CG4482-PD	2E-069	10	gi|193687042	265	233	435	55	54	103	8	75	49	1	1	N	FOR	Acyrthosiphon pisum	Dual oxidase maturation factor 1 OS=Xenopus tropicalis GN=duoxa1 PE=2 SV=1	3E-028	10	sp|Q0P4G7|DOXA1_XENTR	126	180	308	37	58	113	5	85
TI_asb-494	494	5	5	556	526	89	4	1	3	3	40S ribosomal protein S23	ps	KOG	7e-76	100	556	450	RQRVCGIMGKPRGIPSARKHVNHRREQRWADKDYKKAHLGTRWKANPFGGASHAKGIVLEKVGVEAKQPNSAIRKCVRVQLIKNGKKITAFVPRDDCLNFIEENDEVLVAGFGRKGHAVGDIPGVRFKVVKVANVSLLALYKEKKERPRS	2	40S ribosomal protein S23, putative	1E-075	10	gi|242025351	284	143	143	96	100	5	0	1	23	1	2	N	FOR	Pediculus humanus corporis	40S ribosomal protein S23 OS=Spodoptera frugiperda GN=RpS23 PE=2 SV=1	8E-076	10	sp|Q962Q7|RS23_SPOFR	282	143	143	95	100	6	0	1
TI_asb-495	495	5	5	735	697	85	1	4	3	-3	40S ribosomal protein S8	ps	KOG	2e-97	104	735	657	LLFPFTLGVPTMGISRDHWHKRRKTGGKRKPIRKKRKHELGRPAANTKIGSKRVHTVRTRGGNAKFRALRLDHGNFSWGSECCTRKTRLIDVVYNASNNELVRTKTLVKNAIVVIDGTPFRQWYEAHYALPLGRKKNAKLTEAEEAVLYKKRSKKVENKYKIRQRLAKVESALEEQFQTGRILACIASRPGQCGRADGYILEGKELEFYLRKIKAKKGK	1	40S ribosomal protein S8	1E-105	10	gi|149689088	383	208	208	91	100	17	0	1	34	1	1	N	FOR	Triatoma infestans	40S ribosomal protein S8 OS=Apis mellifera GN=RpS8 PE=2 SV=2	7E-089	10	sp|O76756|RS8_APIME	327	208	208	76	100	48	0	1
TI_asb-497	497	1	1	751		56	0	1	1	-1	Splicing regulator	tm	KOG	8e-50	51.2	751	750	IIRHYEIDLFYERMPFLGRKRRKVAKSNSAIIIKRKSVNAKIGSQRTRYAGICNPAVNLLLQRLRQELSETRTRLDDTQNELSAWKFTPDSNTGKRLMAKCRLLYQENEELGAMISKGRLAKLEGDLALQKSFSEEVKKSQSELDELLQDLDEDVEGMQSTIYYLQQELRKAKDTIAQLEQDNTNLKSSSSSGGGRQQQHQDENERLSHQQPVIMATTLNGLAPHSKWGEGDNGESDSLDSAQAADNGSA	1	similar to FL(2)D protein, putative	4E-048	10	gi|156545287	172	136	488	63	28	49	0	106	56	2	1	Y	FOR	Nasonia vitripennis	Pre-mRNA-splicing regulator female-lethal(2)D OS=Drosophila pseudoobscura	9E-043	10	sp|Q28XY0|FL2D_DROPS	163	136	560	62	24	51	0	142
TI_asb-498	498	1	1	164	139	37	1	0	1	1	Unknown product	uk				164	162	FFFFFFFFFLAVFLYCKLIHNRFLWVAVIGHLFSLYFILCLINSHICRRKLLKR	4
TI_asb-501	501	1	1	740		55	0	1	1	-1	microsomal signal peptidase 25 kD subunit	pm/protease	NR-LIGHT	4e-78	91.1	740	528	WDGSAVKNALDGAVTDVLTKKYNYVENFALIDGRLLLCGIAVTVAMFALLWDWLYPFPQSRPVLIICVSTYFIFMGLLTLYTTYKEKGIFVVSIQKDPAGFVPDNIWEASSVLKKYDDKYNLSLAMKDGKTGIVRSATIVRSVANFIDENGVIVHELIEPEVSKLHNSPLSERKEK	3	putative microsomal signal peptidase 25 kD subunit	4E-078	10	gi|263173484	293	176	193	78	91	38	0	18	90	1	3	N	FOR	Cimex lectularius	Probable signal peptidase complex subunit 2 OS=Xenopus tropicalis GN=spcs2 PE=2	2E-056	10	sp|Q5M8Y1|SPCS2_XENTR	219	176	201	57	88	74	0	26
TI_asb-502	502	1	1	905	310	25	0	1	1	-1	Ribosomal protein S7e	ps	PFAM	8e-36	46.5	905	402	KKKGGVFFKRKKIYSGVFFLQKYFCGGNIFPHFLPKGGGPIGWEKGRGGGGSFFFFSPLAGKRGGFFIRGLSLGGAPGVFPRPSGLKTSPPFFLMAPPLGGISPRVPLGLGPAYKIFRSLKIGGPGGAKRLIFG	6	hypothetical protein LOC100169556	2E-031	10	gi|285002187	139	88	194	76	45	21	0	107	6	1	3	N	FOR	Acyrthosiphon pisum	40S ribosomal protein S7 OS=Spodoptera frugiperda GN=RpS7 PE=2 SV=1	5E-031	10	sp|Q962S0|RS7_SPOFR	135	88	190	76	46	21	0	103
TI_asb-505	505	1	1	923		33	0	1	1	-1	Unknown product	uk				923	300	QNNHCTLPFIVYIKTVPLYFTFYCLYQNCIIIFYRLYQNCISVFYLLLFITKLYHCILPFIGYNKTVSLYFLCEEGKKLWNCLLHNIHNHHMKELIYFFN	3	NADH dehydrogenase subunit 2	0.009	10	gi|298289309	43.5	112	449	29	25	79	5	148	232	1	1	N	FOR	Leishmania amazonensis	NADH-ubiquinone oxidoreductase chain 5 OS=Trypanosoma brucei brucei GN=ND5 PE=3	0.43	5	sp|P04540|NU5M_TRYBB	35.8	69	590	30	12	48	1	383
TI_asb-506	506	1	1	829		37	0	1	1	-1	Nuclear pore complex component NPAP60L/NUP50	ne	KOG	5e-09	50	829	444	QKMPKRAATSELDHFNWNQEEEEPEEECTTPKIASPEVLSNRVIRTAKRFTSSTSSAPSKSAFSNFTGFGCPSNTTNSDVKTTFSFLSNATTSIFSNTNGISVQKTEQAGKEDTQDNKSYNVNTDNEYLSKLKGLNETVLKWIKINGG	2	hypothetical protein TcasGA2_TC007383	4E-012	10	gi|270005334	74.3	161	326	35	49	104	0	1	209	1	2	N	FOR	Tribolium castaneum	Nuclear pore complex protein Nup50 OS=Homo sapiens GN=NUP50 PE=1 SV=2	3.1	10	sp|Q9UKX7|NUP50_HUMAN	32.7	47	468	44	10	26	0	1
TI_asb-508	508	1	1	1004	577	21	1	0	1	1	Thioredoxin	pm	KOG	1e-23	73.5	1004	276	LPPEKASTFTPFLININVGITLISYCMANSSHSSTSTLSTTISGLEDANSSSLGAIKRHKPHHVAESQLPLSCLLHQLEYSPHLQKILXEXP	5	thioredoxin	3E-038	10	gi|307095132	147	77	105	94	73	4	0	6	67	2	3	Y	FOR	Triatoma matogrossensis	Thioredoxin-2 OS=Drosophila yakuba GN=Trx-2 PE=3 SV=1	2E-018	10	sp|Q6XHI1|THIO2_DROYA	94	74	106	58	70	31	1	29
TI_asb-512	512	1	1	559		45	0	1	1	-1	Unknown product	uk				559	552	ASLKEMIIQLLPFLVFCGLTFASQGQGPFEEKVEPDYQETELASAEDSVSENSDSENNAIPDEWRPMLLHYKQLKEIVINLNKGVDKVLDFIREAFGALGEVSIPLPDITKSIGHSPYAGTINVTNGYFKNPTTIERTGDVEILVSNDTTISLKVGVGLKEVELGFGSYHLDILNVHQHGTISA	3	hypothetical protein TcasGA2_TC013968	0.25	9	gi|270007404	37.4	106	280	24	38	80	4	68	243	1	3	N	FOR	Tribolium castaneum	Putative ATP-dependent RNA helicase D1133L OS=African swine fever virus (isolate	0.67	10	sp|P0C9A6|VF113_ASFWA	33.9	64	1133	32	6	43	1	924
TI_asb-515	515	1	1	641	615	40	0	1	1	-1	Unknown product	uk				641	369	AWDSEACNDLTKSLWKVWDLAIDINNWAFEVGAKVCGKFFGLIHCANINPITAIKCLVNDIKELKSIINLYKPDVMKYENKIVALGKELKVEAHKCFEVHGKTQALAEQIVAEAQLCVESRNH	2	ACYPI006488	2.2	7	gi|239791045	34.7	73	341	36	21	46	0	167	197	1	2	N	FOR	Acyrthosiphon pisum	Putative dioxygenase subunit beta yeaX OS=Escherichia coli (strain K12) GN=yeaX	2.6	10	sp|P76254|YEAX_ECOLI	32.3	59	321	28	18	42	0	113
TI_asb-517	517	1	1	325	301	47	0	1	1	-1	Nuclear protein contains WD40 repeats	uc	KOG	0	6.9	325	177	LNIRNKFGIKMLRQFIIYSYSNLFYNQLSLMIPLSLQRIIIVTKTSMRNEETSYRMHLS	5
TI_asb-518	518	1	1	640		39	0	1	1	-1	Unknown product	uk				640	153	HQIIIYKLIHSQKKNKNILTRKTCTHYYTIIPLIDYRCIKLSFVDFKLSTF	3																			tRNA (guanine-N(7)-)-methyltransferase OS=Buchnera aphidicola subsp. Schizaphis	5.8	1	sp|Q8K927|TRMB_BUCAP	31.2	60	239	35	25	39	7	174
TI_asb-519	519	1	1	719	696	57	0	1	1	-1	reverse transcriptase	te	NR-LIGHT	1e-15	25	719	663	PFNNKIKSRNIIKLITDIENILTNIYTSDSHKNVIRNETSATIQNYIKKHITANKIAVTKNNNKTIVQLNLDKFHTSINQDAKCLKNFLKINQNITIIKSDKTKKYIFINKDELKIKMDLILDDKETYKKTRTNPIKALQKDIDKYTKKLIKYNYYKKPEISSMIEKNPILPRMYPLIKMHKEGHPIRPIVDCTGSIFKKLEYTLYKNPLKILSKKKKKKK	3	reverse transcriptase	1E-015	10	gi|40457592	85.9	215	857	30	25	149	2	198	3	1	3	N	FOR	Drosophila melanogaster	Trigger factor OS=Buchnera aphidicola subsp. Schizaphis graminum GN=tig PE=3	0.002	10	sp|Q8K991|TIG_BUCAP	43.1	193	442	24	44	146	6	117
TI_asb-520	520	1	1	673		58	1	0	1	1	Unknown product	uk				673	135	KTKTKRIIDYCALVLNPQINTNKKTFFNFYIPLIKRGYFFGYNIF	5	unnamed protein product	3.2	2	gi|3721645	34.3	46	482	41	10	27	4	18	390	1	-3	N	REV	Bombyx mori
TI_asb-521	521	17	17	1031	1012	87	9	8	1	1	nonstructural protein precursor Triatoma virus	vir/	NR-LIGHT	4e-68	8.5	1031	492	EFLRKFLIPFLWCSVCSFQLGRISLSQRPWPNPEKKKILQKFVENRPSDPLPILVSELEVNCPLSLTQQFNFDSDDDMDKWLLTSRQSTGTILNYDNNFGIYKAPFSEFMYCTCSECDSTRFDSEKCYFENIGEMFDIDPACINGLVIDRYERLKKISEKKKKK	3	nonstructural protein precursor	4E-068	3	gi|20451029	260	154	1795	77	9	34	0	1	537	1	3	N	FOR	Triatoma virus	Valyl-tRNA synthetase OS=Borrelia garinii GN=valS PE=3 SV=1	7.4	1	sp|Q660D6|SYV_BORGA	32	43	875	46	5	23	1	595
TI_asb-522	522	1	1	800	776	22	1	0	1	1	Unknown product	uk				800	204	XSIXSSLPTNKFXLFNSKIKFSSLNQXXLIPLPTLHSXPQLKXKXLXYLXTXKIXXPFNSSXXXSLFL	4	UNCoordinated family member (unc-93)	7.6	3	gi|71983415	33.5	56	700	37	8	35	7	278	558	1	-1	N	REV	Caenorhabditis elegans	Putative potassium channel regulatory protein unc-93 OS=Caenorhabditis elegans	1.7	3	sp|Q93380|UNC93_CAEEL	33.5	56	705	37	8	35	7	283
TI_asb-524	524	3	3	787		79	0	3	3	-3	Unknown product	uk				787	633	VAVVGCCRADTVVLNQLMDQVLDSVKTVITQAGMDHIKIPDMNNKWRYRWHFVKLSGNAGCQDGEASSLASIRRTGDTTLQTAGNHAVLKVRIGLGNLEFHFGRCRFKAKRLFSVSSRVKAKVKSNSIELQISLTGQGPQCVASLDHVVLDKFGGLHVDTGGGVLHKIENKIIQWASNHFHDKIVKIVNAKLADAVRKSLPKVDLCSRIPH	3	hypothetical protein	6E-008	8	gi|156544907	60.5	192	1493	23	13	146	3	899	42	2	3	N	FOR	Nasonia vitripennis	Mite allergen Der f 7 OS=Dermatophagoides farinae GN=DERF7 PE=1 SV=1	1.7	5	sp|Q26456|ALL7_DERFA	33.5	86	213	23	40	66	0	26
TI_asb-525	525	7	7	875	839	77	3	4	1	-1	hypothetical protein	uc	NR-LIGHT	5e-11	12.8	875	651	VKVLLVVAVVPCCRADTVVLNQLMDQVLDSVKTVITQAGMDHIKIPDMNNKWRYRWHFVKLSGNAGCQDGEASSLASIRRTGDTTLQTAGNHAVLKVRIGLGNLEFHFGRCRFKAKHLFSVSSRVKAEVKSNSIELQISLTGQGPQCVASLDHVVLDKFGGLHVDTGGGVLHKIENKIIQWASNHFHDKIVKIVNAKLADAVRKSLPKVDLCSRIPH	2	hypothetical protein	5E-011	9	gi|156544907	70.9	192	1493	25	13	143	3	254	59	3	2	N	FOR	Nasonia vitripennis	Mite allergen Der f 7 OS=Dermatophagoides farinae GN=DERF7 PE=1 SV=1	0.028	10	sp|Q26456|ALL7_DERFA	39.7	203	213	21	95	159	11	26
TI_asb-526	526	27	27	1240	888	78	15	12	3	3	capsid protein precursor Triatoma virus	vir/	NR-LIGHT	0	21.5	1240	588	DNPAAMYTAADKLPVWTLTPRSGFPTLLTSIGAMYAFYRGGIRLKIVPGVADQPKPLVEVALFTMQDQGYIIKANDYSTDFCSSNIYENFVTKGIAEVQTPYYSRVNTSVVSAPVFYNAGNISPLMPNVMYKITSNSSNILLGHSAADDFRFGFLLGAPLAISATALRDNFTGSSATVSLPTFSNFYLSSTSESTT	2	capsid protein precursor	1E-102	10	gi|20451030	374	187	868	99	22	1	0	673	2	1	2	N	FOR	Triatoma virus	Proline-rich proteoglycan 2 OS=Rattus norvegicus GN=Prpg2 PE=1 SV=2	0.004	10	sp|P10165|PRPG2_RAT	43.1	77	295	38	26	47	0	117
TI_asb-528	528	1	1	688		60	1	0	1	1	Unknown product	uk				688	174	RVLDVISSALRFLAAPHVSKHKDAKLHEPGVLTNITPQGTSTVSVLKFIVLHFYINKS	4	stearoyl-CoA Delta 9 desaturase, putative	2.6	3	gi|124506143	34.7	63	949	31	7	43	0	279	41	1	2	N	FOR	Plasmodium falciparum 3D7	Segregation and condensation protein A OS=Mycoplasma genitalium GN=scpA PE=3	2.3	3	sp|P47455|SCPA_MYCGE	32.7	83	471	31	18	57	0	335
TI_asb-529	529	1	1	1034		24	0	1	1	-1	Unknown product	uk				1034	282	TVFLLKKKNYKKKIGGLKKKMGKNFIRTPPFFFLKIFWETPFFFVEKKKIKNLFPFIKRGLFPAPPKKKNKSKKKFRGGETFFVFCFFLKKKYK	3	stearoyl-CoA Delta 9 desaturase, putative	3.0	1	gi|124506143	35.4	49	949	36	5	31	1	290	77	1	2	N	FOR	Plasmodium falciparum 3D7
TI_asb-530	530	5	5	865	834	73	4	1	3	3	Juvenile hormone binding protein in insects	s/	CDD	6e-11	92.8	865	732	RIIKMKFFLIASFAFAAVVSGAYLPDDDNYEIILAPNVIDKLIRQALEVVRKMLKDHEPFQIPDFPAQHIVDKDIDLNVDLKEVKVSKADDFTVDHIENYLPGLWAKFGVTVPKMHLEGQYKVNGVVQQRKVSGAGTFAVDVDTLVQTGTIQMAMINHALQMKHVDLDFDLKGLKFDLSDLSIEGMTKEQVEELLNSKFLEYLQTNKKEVCEVTARLVVKEANQIMAGKTLKELLDWLKKFIPS	3	similar to CG14661 CG14661-PA	8E-004	10	gi|91082781	47	213	249	21	86	168	10	37	117	1	3	N	FOR	Tribolium castaneum	Putative potassium channel regulatory protein unc-93 OS=Caenorhabditis elegans	1.5	10	sp|Q93380|UNC93_CAEEL	33.9	59	705	35	8	38	0	220
TI_asb-531	531	6	4	875	840	65	3	3	0	0	Juvenile hormone binding protein in insects	s/	SMART	2e-11	85.7	875	765	ARIIKMKFFLIASFAFVAAVSGAYLPVDDNYEIILAQNVIDKLIRQALEVVRKMLKDHEPFQIPDFPAQHIVDKDIDLNVDLKEVKVSKADDFTVDHIENNLPGLWAKFGVTVPKMHLEGQYKVNGVVQQRKVSGAGTFAVDVDTLVQTGTIQMAMINHALQMKHVDLDFDLKGLKFDLSDLSIEGMTKEQVEELLNSKFLEYLQTNKKEVCEVVARQVVKGTKSKNGREKPLKKLLEWVKKIHPSKNQFSSWFF	2	similar to CG14661 CG14661-PA	3E-004	10	gi|91082781	48.5	122	249	27	49	89	8	37	119	1	2	N	FOR	Tribolium castaneum	UPF0182 protein alr1037 OS=Nostoc sp. (strain PCC 7120 / UTEX 2576) GN=alr1037	3.4	10	sp|P58612|Y1037_NOSS1	32.7	59	1002	30	6	41	0	338
TI_asb-532	532	2	2	835		67	0	2	2	-2	Cystatin-like domain	s/protinh	SMART	3e-12	94.3	835	372	KIYNMKPITFFILPLLAVLFMLNSYAEAKVCAGCVQDADPNNPKIKKQLVDVLVAQSEDCEIIKVITAKTQVVSGIKYIIDFEVKERKTNKVKICSTTFVSQPWRFKLPLVQQFLCHDELSKSN	1	kininogen-1 isoform 3	0.006	10	gi|156231023	43.9	113	480	30	24	79	6	261	139	1	1	N	FOR	Mus musculus	Sarcocystatin-A OS=Sarcophaga peregrina PE=1 SV=1	3E-005	10	sp|P31727|CYTA_SARPE	49.3	99	122	29	81	70	5	3
TI_asb-533	533	1	1	952	870	31	1	0	1	1	Cystatin-like domain	s/protinh	SMART	2e-13	94.3	952	396	HSPFLGVKIYNMKPITFFTVPLLAVLFMLINSYAEAKVCAGCVQDADPNDPEIKKLLVQVLVAQSEDCDIIKVIRAKTQVVSGIKYIIDFEVKERKTNKVKICSTTFVSQPWRFKLPLVQQFLCHDELSKSN	1	kininogen-1 isoform 3	0.001	10	gi|156231023	46.6	113	480	30	24	79	6	261	139	1	1	N	FOR	Mus musculus	Sarcocystatin-A OS=Sarcophaga peregrina PE=1 SV=1	1E-004	10	sp|P31727|CYTA_SARPE	47.8	98	122	29	80	69	5	4
TI_asb-534	534	1	1	258	223	46	0	1	1	-1	hypothetical protein Bm1_17870 Brugia malayi	uc	NR-LIGHT	3e-13	90.3	258	195	LISCRWSILGLPWPSRVTGNQGSIPEREPEKRLPHPRKAAGTQITHSRHGEVVTKKKKKKKKKKH	2	hypothetical protein Bm1_17870	3E-013	10	gi|170579899	76.3	56	62	67	90	18	0	1	31	1	-1	N	REV	Brugia malayi	Mucin-16 OS=Homo sapiens GN=MUC16 PE=1 SV=2	2.0	4	sp|Q8WXI7|MUC16_HUMAN	31.2	41	22152	39		25	0	5626
TI_asb-535	535	2	2	1034	210	42	0	2	2	-2	hypothetical protein Bm1_17870 Brugia malayi	uc	NR-LIGHT	4e-15	95.1	1034	201	TLCLPWPSRVTGNQGSIPEREPEKRLPHPRKAAGTQITHSRHGEVVTKKKKKKKIYDLFIWLYLFTL	1	hypothetical protein Bm1_17870	4E-015	10	gi|170579899	84.7	59	62	66	95	20	0	1	9	1	-1	N	REV	Brugia malayi	Ribosomal large subunit pseudouridine synthase D OS=Buchnera aphidicola subsp.	5.7	1	sp|Q89AD9|RLUD_BUCBP	32.3	104	317	29	33	73	7	214
TI_asb-536	536	4	4	910		78	3	1	2	2	CG41536 CG41536-PA	uc	NR-LIGHT	4e-27	50.3	910	462	DTCVIFCQMYRPSQTPRLAVSSNRITLGSMLPNSTTESTNAHVIRRINSVEEYPHLTRDKAYGRPSTTLGVWHENTVTPRWYHPDGRPPPHRVSKKTMKVVVFHCRQFKKLPPTYATPLMSSYSTRLESSSTGSSFPADFSKPVPLAVVSLDSR	4	similar to CG41536 CG41536-PA	4E-027	10	gi|189242281	124	80	159	77	50	18	0	79	636	1	-3	N	REV	Tribolium castaneum	Uncharacterized protein ART2 OS=Saccharomyces cerevisiae GN=ART2 PE=4 SV=1	2E-009	8	sp|Q8TGM7|ART2_YEAST	63.5	53	61	58	87	22	0	6
TI_asb-537	537	1	1	569	537	46	0	1	1	-1	CG41536 CG41536-PA	uc	NR-LIGHT	5e-15	33.9	569	417	QMYRPSQTPRLAVSSNRITLGSMLPNSTTESTNAHVIRRINSVEEYPHLTRDKAYGRPSTTLGVWHENTVTPRWYHPDGRPPPHRVSKKTMKVVVFHCRQFKKLKTTYATPLMSSYSTRLESSSTGSSLQCGGVPSPFP	6	similar to CG41536 CG41536-PA	5E-015	10	gi|189242281	82.8	54	159	77	34	12	0	105	374	1	-2	N	REV	Tribolium castaneum	Uncharacterized protein ART2 OS=Saccharomyces cerevisiae GN=ART2 PE=4 SV=1	1E-006	10	sp|Q8TGM7|ART2_YEAST	53.1	40	61	65	66	14	0	19
TI_asb-538	538	24	27	669	529	80	17	7	10	10	salivary secreted protein	s/	NR-LIGHT	3e-15	97	669	432	NIQKNCICRWDTEIYKTMHIKIVVLLIFAISATSWAYPKTACGSGPTHDLLQGRRQLGDTLLYSTREKMPASFLRVQSRDVKWPAKHMQAYQHITRIEVWDQKHDGSGGCAFLASGGIGQNYVKLHLKTQRGGSFDFLINIYGR	2	putative salivary secreted protein	3E-015	10	gi|149898838	84.3	132	136	36	97	84	0	6	47	1	2	N	FOR	Triatoma infestans	Zonadhesin OS=Mus musculus GN=Zan PE=2 SV=1	1.3	3	sp|O88799|ZAN_MOUSE	33.5	99	5376	27	2	72	8	3651
TI_asb-539	539	1	1	486	469	37	0	1	1	-1	salivary secreted protein	s/	NR-LIGHT	5e-14	89.7	486	303	LGGTHDLLQGRRQLGDTLLYSTREKIPASFLRVQSRDVKWPAKHMQAYQHITRIEVWDQKHDGSGGCAFLASGGIGQNYVKLHLKTQRGGSFDFLINIYGR	1	putative salivary secreted protein	5E-014	10	gi|149898838	79	122	136	36	90	78	0	17	19	1	1	N	FOR	Triatoma infestans	Zonadhesin OS=Mus musculus GN=Zan PE=2 SV=1	1.1	4	sp|O88799|ZAN_MOUSE	32.7	69	5376	28	1	49	2	3651
TI_asb-540	540	1	1	468		22	1	0	1	1	Nuclear protein contains WD40 repeats	uc	KOG	0	8.2	468	297	PGDSEIYKTMHNKIVVSLIFAISAIIVCRAKNCKLIRANTVFASGSYIIGSDTYCSHTNVKVCPQLCMSSDIAHRVKGQLRPRLAVLSLRPAXFGGSKT	2	AGAP003713-PA	3E-006	10	gi|158291968	53.1	43	119	53	36	20	0	77	291	1	3	N	FOR	Anopheles gambiae str. PEST	Putative olfactory receptor 5AK3 OS=Homo sapiens GN=OR5AK3P PE=5 SV=1	2.1	9	sp|Q8NH89|O5AK3_HUMAN	31.6	53	298	32	18	36	3	124
TI_asb-541	541	1	1	565		56	0	1	1	-1	Unknown product	uk				565	405	FFFNKISNYSVFYTMEDRDLLNSVNIHDRLHATKLTPLPDDEEDTDDLINTQYLNLNRLPENLHKVQLVNEQLTQEILSNHHVVELATNNDYSHTNTSHHQHDTTNPNVQQAGANVSTTNPTEQFYDEEEELLAN	2	pro-neuregulin-1, membrane-bound isoform-like	0.26	10	gi|311272401	37.4	80	563	28	14	57	3	224	326	1	2	N	FOR	Sus scrofa	Pro-neuregulin-1, membrane-bound isoform OS=Xenopus laevis GN=nrg1 PE=2 SV=1	0.037	10	sp|O93383|NRG1_XENLA	38.1	70	677	28	10	50	3	321
TI_asb-543	543	7	7	1068	991	81	6	1	5	5	NADH dehydrogenase subunits 2 5	met/energy	KOG	2e-29	98.8	1068	318	FNPPIAPVITDRIIIIGRRVLLVICERIHIGAIFCHVIRMVQFAHDIFSKISGNQKWNGGTPNLIIILNIKAVFKNSSPIMGEIIIEEFKSTDLNIRNDPKLWTKK	4	NADH dehydrogenase subunit 2	3E-090	10	gi|11182463	334	326	332	54	98	147	0	7	5	1	2	N	FOR	Triatoma dimidiata	NADH-ubiquinone oxidoreductase chain 2 OS=Drosophila yakuba GN=mt:ND2 PE=3 SV=1	4E-040	10	sp|P03895|NU2M_DROYA	165	283	341	35	83	182	2	7
TI_asb-544	544	112	112	1305	1260	96	52	60	8	-8	Unknown product	uk				1305	189	LVYGIILFLLLLSSNILGDKLRVNYISFRFCWEFCRLEISHQLFRYRLFSFMIYLFGFICLLE	2	unknown	1.9	1	gi|148616181	36.6	23	30	73	77	6	0	8	1119	1	3	N	FOR	Haemaphysalis qinghaiensis	Ribosomal large subunit pseudouridine synthase D OS=Buchnera aphidicola subsp.	7.8	1	sp|Q89AD9|RLUD_BUCBP	32.3	104	317	29	33	73	7	214
TI_asb-545	545	2	2	560	506	64	1	1	0	0	Unknown product	uk				560	192	VCSTFKFLHDLSSDRREPGQFLSLNLLYILVRKDRVYGIIFVNLINIKKKKKKKKKEKKKKKKK	2	unknown	0.43	4	gi|148616181	36.6	23	30	73	77	6	0	8	365	1	2	N	FOR	Haemaphysalis qinghaiensis
TI_asb-547	547	1	1	486		36	0	1	1	-1	Creatine kinases	met/energy	KOG	9e-60	37.1	486	468	LRCRYLCSPSAGCLYFRISLTLFFLLEDGGFKKTDKHPAKDWGDVDSLGNLDPAGEFIISTRVRCGRSLEGYPFNPCLTEGQYKEMEEKVSATLSGFTGELKGTYYPLTGMTKETQQKLIDDHFLFKEGDMFLQAANACRFWPTGRGIFHNENKNF	3	arginine kinase	3E-073	10	gi|116235665	267	135	356	93	38	9	2	61	10	2	3	Y	FOR	Triatoma vitticeps	Arginine kinase OS=Apis mellifera GN=ARGK PE=2 SV=1	4E-067	10	sp|O61367|KARG_APIME	249	135	355	85	38	19	2	61
TI_asb-548	548	6	6	1016		77	1	5	4	-4	Creatine kinases	met/energy	KOG	0	85	1016	954	NTRMVDAAVLEKLESGFKKLEASDSKSLLKKYLTRELFDKLKNLKTPTFGSTLLDVIQSGLENHDSGVGIYAPDAEAYTIFADLFDPIIEDYHGGFKKTDKHPAKDWGDVDSLGNLDPAGEFIISTRVRCGRSLEGYPFNPCLTEGQYKEMEEKVSATLSGFTGELKGTYYPLTGMTKETQQKLIDDHFLFKEGDRFLQAANACRFWPTGRGIFHNENKTFLVWCNEEDHLRLISMQMGGDLGQVYRRLVSAVNDIEKRVPFSHHDRLGFLTFCPTNLGTTVRASVHIKVPKLAANKAKLEEVAGKFNLQVRGTRGEH	1	arginine kinase	1E-180	10	gi|116235665	634	315	356	97	88	7	0	1	70	1	1	N	FOR	Triatoma vitticeps	Arginine kinase OS=Schistocerca americana GN=ARGK PE=2 SV=1	1E-163	10	sp|P91798|KARG_SCHAM	574	315	356	86	88	43	0	1
TI_asb-549	549	3	3	875	842	76	1	2	1	-1	Unknown product	uk				875	627	GVHRNNYSWEQLMDNKKFLKFLSSFKEPRRHGNDISVPMDKSNCFSQSSGLDQDCLIWLIENEVLDFNFLNYDLFFKGKNIEMNKEYIMYYLVTLKSRRTKGPYGTRYYVCNHCGCVTSAYRKHFEQCYTDLEEDYITRMDETRFLQKLYQDFKQAVNDGYIPYTYRRALCSYYGEDYLEFCTHVEELNFKIIKDDEIEKKKKKKKKNL	1	conserved Plasmodium protein, unknown function	4.0	6	gi|124513158	34.7	114	1486	26	8	84	7	376	481	1	1	N	FOR	Plasmodium falciparum 3D7	Spermidine synthase OS=Streptococcus uberis (strain ATCC BAA-854 / 0140J)	9.9	1	sp|B9DUY3|SPEE_STRU0	31.2	61	285	27	21	44	4	116
TI_asb-550	550	1	1	262	228	46	0	1	1	-1	Unknown product	uk				262	192	ETRFLQKLYQDFKQAVNDGYIPYTYRRALCPYYGEDYLEFCTHVEELNFKIIKNKKKKKKKKKK	3																			Plasma membrane fusion protein prm1 OS=Aspergillus terreus (strain NIH 2624 /	6.2	1	sp|Q0CQS4|PRM1_ASPTN	29.6	47	725	27	6	34	0	258
TI_asb-551	551	3	3	536	509	82	0	3	3	-3	salivary secreted protein	s/	NR-LIGHT	1e-67	97.6	536	390	ITPQGIVITLLLVTCLSLTYGWPPHQYGNHSLIIGRKGYNDVILFQKTVSKKNWNPFGKVSEDVTYPVRPIPGRRPLITEIDTIDLDSNDKGGYAYVLKGGINRNNVTIHFKSQKGRGYKFNLTIFGRIY	1	salivary secreted protein	1E-067	10	gi|149689094	257	126	129	96	98	4	0	4	49	1	1	N	FOR	Triatoma infestans	Probable O-sialoglycoprotein endopeptidase OS=Riemerella anatipestifer GN=gcp	3.0	4	sp|Q9F0V0|GCP_RIEAN	31.6	75	341	25	22	56	2	141
TI_asb-552	552	1	1	540	508	54	1	0	1	1	salivary secreted protein	s/	NR-LIGHT	5e-56	66.6	540	237	KNWNPFGKVSEDVTYPVRPIPGRRPLITEIDAIDLDSNDKGGYAYVLKGGINRNNVTIHFKSQKGRGYKFNLTIFGRIY	3	salivary secreted protein	5E-056	10	gi|149689094	170	86	129	94	67	5	0	20	97	2	3	Y	FOR	Triatoma infestans	Isoleucyl-tRNA synthetase, cytoplasmic OS=Schizosaccharomyces pombe	4.0	3	sp|O13651|SYIC_SCHPO	31.2	77	1064	29	7	54	9	824
TI_asb-553	553	1	1	543	509	54	0	1	1	-1	salivary secreted protein	s/	NR-LIGHT	8e-60	85.2	543	351	XXXPFKEGWXPHQYGNHSLIIGRKGYNDVILFQKTVSKKNWNPFGKVSEDVTYPVRPIPGRRPLITEIDTIDLDSNDKGGYAYVLKGGINRNNVTIHFKSQKGRGYKFNLTIFGRIY	1	salivary secreted protein	8E-060	10	gi|149689094	231	110	129	98	85	2	0	20	97	1	1	N	FOR	Triatoma infestans	Probable O-sialoglycoprotein endopeptidase OS=Riemerella anatipestifer GN=gcp	3.1	3	sp|Q9F0V0|GCP_RIEAN	31.6	75	341	25	22	56	2	141
TI_asb-555	555	1	1	753	727	33	0	1	1	-1	CG10527 - farnesoic acid O-methyltransferase	met/lipd	GO	6e-11	32.1	753	534	ITHIMEGWHPLCGCGCSNPGIPCRGFVPPTPGGYGGYRGLTVSSPYATPPSYVPQRNHSSYGWIPPAHCMGTFRWQTCYGGSVPADAVHAGTDLNGGPIYVGRAFHSGDLLPAKVTPAHGCAYVSYAGTEISKQDNEVLCSSHVAWKFLPKRRITTGSYKKRQIQPWKKPCVWEKNYG	1	ACYPI005577	1E-017	10	gi|239790499	92.4	104	167	46	62	56	6	9	238	2	1	N	FOR	Acyrthosiphon pisum	Natterin-1 OS=Thalassophryne nattereri PE=1 SV=1	0.32	8	sp|Q66S25|NATT1_THANI	35.8	56	355	35	16	36	0	110
TI_asb-556	556	5	7	779	724	65	3	2	1	1	Triabin	s/protinh	PFAM	1e-15	94.5	779	774	MRPLRPGDKQYSIVISSMKIVLLLTFAGASLTLAFAASLENQGCLNVPAKEKFEPNKYFNGRWHLTYLQKAPISPTDVCQESLSNILEDGTISHKIYAYSEKRDPQFVELDCTSNLREIKDDLGKVPLHCKVAKNDKVLEFGMDGTIVETDYDHFALFYVCGKYQNNKIENLLLLNREKDGGTKRFKNLGKLLKKIRFRFNLLLAFKKNVNLKKNFLMFKVIKLKNLKNFVNNKKKKFCEVKKKKKKKKKKKKFLGGF	2	triabin-like lipocalin precursor	5E-014	10	gi|307094892	80.5	186	210	31	89	127	12	1	53	1	2	N	FOR	Triatoma matogrossensis	Triabin OS=Triatoma pallidipennis PE=1 SV=1	0.002	10	sp|Q27049|TRIA_TRIPA	43.5	166	160	27	104	120	4	1
TI_asb-557	557	4	4	851	820	51	3	1	2	2	Unknown product	uk				851	150	INKQKDMFLLNRRALNLPSSYELINKIHKRGXFXXXXXXXSFKYLKSTNK	5																			Uncharacterized protein RP382 OS=Rickettsia prowazekii GN=RP382 PE=4 SV=1	4.2	1	sp|Q9ZDE9|Y382_RICPR	32.3	74	510	35	15	48	2	172
TI_asb-558	558	1	1	182	159	33	1	0	1	1	Unknown product	uk				182	132	DSEIHNYSYMLKYNVNLKNIMPLTHNFSVDRWRLTWPVWHRGDL	3
TI_asb-560	560	1	1	381		38	0	1	1	-1	TPR repeat-containing protein	uc	KOG	1e-25	58.2	381	309	EAHEEILKDDEIETEEVLKAKEIYLKGIQAAENGQVEEAIKLFTDALNVFQRASGYNNRAQAYRLLGRDEDALNDLNTALDISKEKGKSGCQALCQRGLLHRK	1	tetratricopeptide repeat protein, putative	1E-018	10	gi|241333867	94.4	93	180	49	52	47	1	33	100	1	1	N	FOR	Ixodes scapularis	Tetratricopeptide repeat protein 36 homolog OS=Drosophila melanogaster	3E-019	10	sp|Q9VU70|TTC36_DROME	94	101	185	46	55	54	1	37
TI_asb-561	561	1	1	759		32	0	1	1	-1	TPR repeat-containing protein	uc	KOG	6e-52	101.1	759	618	SGISLNDKAVSNTGFNPLLPVEDAILDEVNEEILKDDEIETEEVLKAKEIEFKGIQAAENGQVEEAIKLFTDALNVFQRASGYNNRAQAYRLLGRDEDALNDLNTALDISKEKGKSGCQALCQRGLLHRKKGQTDLAKSDFAKAAQLGSKFAKQQLVELNPYAAMCNQMLNEMMTKLRQIETHENWRCIIRLLIFKNKKKTKKMVN	3	hypothetical protein BRAFLDRAFT_122687	3E-039	10	gi|260793432	164	180	184	50	98	90	1	5	18	1	3	N	FOR	Branchiostoma floridae	Tetratricopeptide repeat protein 36 OS=Danio rerio GN=ttc36 PE=2 SV=1	2E-038	10	sp|A8E7I5|TTC36_DANRE	159	183	187	47	98	96	2	3
TI_asb-562	562	1	1	830	807	47	1	0	1	1	Unknown product	uk				830	669	HSALAGESFKGSNMMYWTVFGIFIASAACTQIDKGNSVIVNEFLDQTLSRINNEPNIDSKLNISKIHVDKYSFENGVLTNLKSWKRSGDTIMWSNSRKVSISAHVILQEMVFTADEMLIESEKATSPVLKIKDNLLYFLFQVELDSKSGCKVTDHIVSWKQLDGTIFSNNPKYNNKNFSLTQAELKHLNKPSNNEQVLKFLLENMIICPQIPKNLFLFERGKT	2	ACYPI37407	0.051	10	gi|239789926	40.8	159	214	23	74	122	5	21	206	1	2	N	FOR	Acyrthosiphon pisum	Reticulocyte-binding protein PFD0110w OS=Plasmodium falciparum (isolate 3D7)	0.48	6	sp|P86148|RBP1_PLAF7	35.4	193	2971	20	6	153	20	1626
TI_asb-563	563	1	1	504		40	1	0	1	1	Unknown product	uk				504	288	PNIDSKLNISKIHVDKYSFENGVLTNLKSWKRSGDAIMWSNSRKVSISAHVILQEMVFTADEMLIESEKATSPVLKIKDNLLYFLFQVELDSKSGC	1	zinc finger protein GLI1	3.6	2	gi|170035164	33.1	40	670	37	6	25	0	176	19	1	-1	N	REV	Culex quinquefasciatus	Soluble pyridine nucleotide transhydrogenase OS=Pseudomonas stutzeri (strain	4.5	2	sp|A4VMU6|STHA_PSEU5	30.8	41	464	41	9	24	5	230
TI_asb-564	564	4	4	743	717	79	4	0	4	4	nitrophorin 1A precursor	s/	NR-LIGHT	2e-11	82.4	743	630	KCTPANDAKETAIILVSLLSQSIAVPLKEECRYIKTTHQFDPVKYFGKTWYVTYALYAGVKLTPDDVACMKTEYNLLTNGIVRELDTTYIPKNATFLHSENYINLADFSDGTAAYVSVARPIDKDGRPLVKEFYPLQNNIVDTDYDTYSFAYTCVKIPNGKSLSVYYVLNRESAGTINGKILSILKEIGLKADDFTRINNDNCKEDKILK	1	rhodnius biogenic aminebinding-like protein	2E-060	10	gi|307094890	234	193	211	56	91	84	1	9	61	1	1	N	FOR	Triatoma matogrossensis	Apolipoprotein D OS=Macaca fascicularis GN=APOD PE=2 SV=1	2E-005	10	sp|Q8SPI0|APOD_MACFA	49.7	203	189	24	107	153	10	5
TI_asb-565	565	4	4	590		84	4	0	4	4	rhodnius biogenic aminebinding-like protein	uc	NR-LIGHT	1e-47	84.8	590	588	GRGQSSVRNKLIEKCTPAKMYKLTALVLVSILSQSLAAHLEEECRSIKTTHQFDPVKYFGKKWYVTYELYADVKLITPSDVACMKNEYNLLTNGIVRELDTTYIPKNETYFRSECYINLADFTDGTAVYVSVARPIDKDGRPLVKEFYPLQNNIVDTDYDTYSFVYTCLKLSNGKTLSMYNVLNRELTGTLNGKIL	1	rhodnius biogenic aminebinding-like protein	1E-047	10	gi|307094890	191	179	211	53	85	84	2	1	58	1	1	N	FOR	Triatoma matogrossensis	Crustacyanin-A2 subunit OS=Homarus gammarus PE=1 SV=1	0.001	10	sp|P80007|CRA2_HOMGA	43.1	134	174	22	77	104	0	11
TI_asb-566	566	1	2	639		62	0	1	1	-1	Eukaryotic aspartyl protease	pm/protease	PFAM	1e-52	46.8	639	630	FCSLPHTPGSNNGTLRVPLYLLYKEPRDFHEFVETATISHANLHRYLLLQKSGVKEVLKNNLNSAYYGEISLGTPPQNFSVLFDTGSSDLWIPSSSCYFSLACWNHNKYKGSRSSTHVNDGRHLKLIYGTGDVEGFLSNDTLTISSLKVVNQTFAEMTSESRNPFREAKFDGILGLAYPSLSAYNVQPPHCNMFEQKLIDRPVFSFYLKR	2	cathepsin D	5E-050	10	gi|301030231	199	194	390	52	50	92	0	23	56	1	2	N	FOR	Triatoma infestans	Cathepsin D OS=Gallus gallus GN=CTSD PE=1 SV=1	8E-042	10	sp|Q05744|CATD_CHICK	170	156	398	51	39	76	1	68
TI_asb-567	567	1	1	962	920	37	1	0	1	1	cathepsin D	pm	NR-LIGHT	1e-14	23	962	315	KLSLLILFFIGTLFSNNGTLRVPLYKIYKEPRDFHEFVETATISHANLHRYLLLQKSGVKEVLKNNLNSAYYGEISLGTPPQNFSVLFDTVHQIYGYHLLAVILV	2	cathepsin D	1E-014	10	gi|301030231	76.3	90	390	45	23	49	0	3	2	2	2	Y	FOR	Triatoma infestans	Procardosin-B OS=Cynara cardunculus GN=cardB PE=1 SV=1	7E-010	10	sp|Q9XFX4|CARDB_CYNCA	51.6	100	506	40	20	60	10	6
TI_asb-568	568	1	1	734		58	1	0	1	1	Ubiquitin-protein ligase	pm	KOG	9e-65	81.9	734	594	VLFGRQGIGLLHYVVLGPENSPYEGGMYHGKLIFPREFPFKPPSIYMITPNGRFKVNTRLCLSISDFHPDMWNPAWSVSTILTGLLSFMLEHSPTLGSIETSESEKKQLAFRSLSFNLNDPQFCEQFPGLVDVIKRELRAREEAEEEAKRRRLERLGTLNGDVNGLNGELGSSPSSTDASILSSALSNIGVLVGVAAF	2	similar to ubiquitin conjugating enzyme E2, J2	5E-055	10	gi|91082969	216	187	225	58	83	77	0	41	170	1	2	N	FOR	Tribolium castaneum	Ubiquitin-conjugating enzyme E2 J2 OS=Mus musculus GN=Ube2j2 PE=1 SV=1	3E-054	10	sp|Q6P073|UB2J2_MOUSE	211	201	259	57	78	85	14	45
TI_asb-569	569	1	1	989		25	0	1	1	-1	Ubiquitin-protein ligase	pm	KOG	6e-46	51.2	989	297	VLFGRQGIGLLHYVVLGPENSPYEGGMYHGKLIFPREFPFKPPSIYMITPNGRFKVNTRLCLSISDFHPDMWNPAWSVSTILTGLLSFMLEHSSPFRGV	3	similar to ubiquitin conjugating enzyme E2, J2	2E-040	10	gi|91082969	168	118	225	67	52	38	0	41	165	1	3	N	FOR	Tribolium castaneum	Ubiquitin-conjugating enzyme E2 J2 OS=Mus musculus GN=Ube2j2 PE=1 SV=1	2E-040	10	sp|Q6P073|UB2J2_MOUSE	166	120	259	68	46	38	0	45
TI_asb-570	570	4	4	686	627	66	0	4	4	-4	Nuclear protein contains WD40 repeats	uc	KOG	0	4.9	686	261	LVLGQFCTLFFMGKTLNIRPPILKKKKGSPNYFFLFFNLGRPPKRENPNPFTPNLTLFPTPFGNPPGSQKKKKKKKKKKKFLRPPPP	2																			Tescalcin OS=Xenopus tropicalis GN=tesc PE=2 SV=1	5.0	1	sp|Q0V9B1|TESC_XENTR	31.6	26	214	46	12	14	0	64
TI_asb-571	571	1	1	1015	646	20	0	1	1	-1	Actin regulatory protein (Wiskott-Aldrich syndrome protein)	cs	KOG	3e-09	25.8	1015	294	GGVVGVCWWVALHERRGWVFYFIFVGWVVRTPSPGCFFFSPLCFPRVGFFIKRRGGARWDFFVIISAFSLLWGGYLVPKGGLLILGGAPQVFDFVGEV	4	CG13722	0.008	10	gi|24657755	43.9	90	707	38	13	55	4	181	757	8	1	N	FOR	Drosophila melanogaster	Pistil-specific extensin-like protein OS=Nicotiana tabacum PE=2 SV=1	0.001	10	sp|Q03211|PEXLP_TOBAC	44.7	85	426	35	20	55	0	144
TI_asb-573	573	9	9	849		84	1	8	7	-7	Thioredoxin reductase	detox/ox	KOG	2e-58	26.4	849	414	XLSGDYENVATTVFSPLEYGCVGLSEEAAINKLGQDNIEVYHAFYKPLEFFIPQRNPARCYLKVICKRQPPRTVIGMHFLGPQAGEVIQGFAAGVKCGMTFEQLENTVGIHPTVAEEFTRLVITKRSGLDPTPQSCCS	2	similar to thioredoxin reductase	2E-053	10	gi|193645813	211	134	493	71	27	38	0	360	26	1	2	N	FOR	Acyrthosiphon pisum	Thioredoxin reductase 2, mitochondrial OS=Bos taurus GN=TXNRD2 PE=1 SV=2	3E-050	10	sp|Q9N2I8|TRXR2_BOVIN	199	132	511	65	26	45	0	378
TI_asb-574	574	1	1	849	814	29	0	1	1	-1	Thioredoxin reductase	detox/ox	KOG	3e-42	26	849	312	QEXXEXXHAXXKXXEXXXXQXXPASCYLKVICKRQPPRTVIGMHFLGPQAGEVIQGFAAGVKCGMTFEQLENTVGIHPTVAEEFTRLVITKRSGLDPTPQSCCS	3	similar to thioredoxin reductase isoform 2	6E-040	10	gi|91079422	166	132	492	60	27	52	0	361	3	1	3	N	FOR	Tribolium castaneum	Thioredoxin reductase 2, mitochondrial OS=Bos taurus GN=TXNRD2 PE=1 SV=2	3E-036	10	sp|Q9N2I8|TRXR2_BOVIN	152	129	511	55	25	57	0	381
TI_asb-575	575	6	6	772		81	4	2	2	2	ATP synthase F0 A subunit - hydrogen ion transporting ATP synthase rotational mechanism - plasma membrane proton-transporting ATP synthase	tr	GO	8e-12	49.1	772	276	VNHTQHMLAHLIPEGSPAILIPFIACIETIRNFIRPGALAVRLTANIIAGHLLISLLGDSVLNTPNYIIPLIIIFQLILVLFETAVSFIQAY	2	truncated ATPase subunit 6	3E-073	10	gi|149898887	277	210	222	70	95	61	0	1	143	1	2	N	FOR	Triatoma infestans	ATP synthase subunit a OS=Drosophila simulans GN=mt:ATPase6 PE=3 SV=1	3E-047	10	sp|P50269|ATP6_DROSI	188	211	224	47	94	110	1	1
TI_asb-576	576	1	1	679	655	49	1	0	1	1	ATP synthase F0 subunit 6	met/energy	KOG	6e-54	87	679	339	VNHTQHMLAHLIPEGSPAILIPFIACIETIRNIIRPGALAVRLTANIIAGHLLISLLGDSILNTPNYIIPLIIIFQLILVLFETAVSFIQAYVFSVLRTLYTREVAEKKKKKK	3	truncated ATPase subunit 6	1E-070	10	gi|149898887	268	216	222	68	97	68	0	7	3	1	3	N	FOR	Triatoma infestans	ATP synthase subunit a OS=Drosophila simulans GN=mt:ATPase6 PE=3 SV=1	2E-049	10	sp|P50269|ATP6_DROSI	195	217	224	47	97	113	1	7
TI_asb-577	577	1	1	990	867	24	0	1	1	-1	truncated ATPase subunit 6	uc	NR-LIGHT	5e-25	27.4	990	495	NLGGRKPHQQMANPLKSPKGTPPNLLPFQRRGLETLKKFFPPRELWGFQKKPKIKIWGNPLYISFLREKNFLITPPNTKTPQKKKFFPKKNSFFFYKKKKFFFFFYAFYFFFFLLKKKLPHQKKKKGSPSKKKKKKKKKKKKKKKKKGGGAPPPPPPPHPTKLLN	3	truncated ATPase subunit 6	5E-025	10	gi|149898887	111	61	222	91	27	5	0	1	140	2	2	Y	FOR	Triatoma infestans	ATP synthase subunit a OS=Anopheles gambiae GN=mt:ATPase6 PE=3 SV=1	9E-014	10	sp|P34834|ATP6_ANOGA	69.3	62	226	56	27	27	1	1
TI_asb-579	579	1	1	897	806	33	0	1	1	-1	Serpentine type 7TM GPCR chemoreceptor Srz	st	PFAM	4e-07	51	897	240	FFLYLCFPKYFDSWIVSENIGLLFCIFIHFNFKKKGIKKKKSLNNKGVKNKFSFVNFFFKQIFFFCKIKSKIFLNSFLYF	1
TI_asb-580	580	5	5	823		71	0	5	5	-5	Unknown product	uk				823	303	RFSFLNTFFIKLKCIKIQNNKPMCSGTNHGIKIFWKTKIQKKLVVQKKKMYDLKSFAYGTHLQNHILFFKKRKKKILHSKIRLILGSSYSVPKICLKSADW	6	hypothetical protein	8.0	1	gi|68071833	33.5	36	889	52	4	17	4	151	620	1	-1	N	REV	Plasmodium berghei
TI_asb-581	581	1	1	502	463	43	1	0	1	1	Arthropod defensin	imm	PFAM	0.0002	102.9	502	327	DEIGLNEIQQFWRNLLLEHNYFNSCSGRYFLHNNRFHDPDIDNVGDRQNLNVIHRRWSSSHELHVFRLLHQPALLGLHLMVAGVRSQLDVSRLGLLLRTELPKRAGRIS	6	defensin B	7E-014	10	gi|29335960	78.6	76	94	48	81	39	8	18	89	1	2	N	FOR	Rhodnius prolixus	Tenecin-1 OS=Tenebrio molitor PE=1 SV=1	0.002	10	sp|Q27023|DEFI_TENMO	42	57	84	36	68	36	9	28
TI_asb-582	582	1	1	427	401	62	1	0	1	1	Arthropod defensin	imm	PFAM	0.0002	105.8	427	324	DKIGLNEIQQFWRNLLLKHNYFNCSNGRFFLYNDHFHDPDIDNVGYRENLNVIHRRWPSSYELYVFRLLHQLALLGLHLMVAGASQLDVSKLGLLLRTELPKRAGQTS	4	defensin A	2E-014	10	gi|149689102	79.7	74	93	52	80	35	8	18	73	1	1	N	FOR	Triatoma infestans	Defensin OS=Oryctes rhinoceros PE=1 SV=1	7E-004	10	sp|O96049|DEFI_ORYRH	42.7	60	79	35	76	39	8	18
TI_asb-583	583	2	2	513	426	72	2	0	2	2	Translation initiation factor 4F helicase subunit (eIF-4A)	ps	KOG	3e-14	10.5	513	156	ASLWKFRSLFPKNLSDVVERCTKFLLGTLKYQVRNMHWHFFYYGVIKLLYVL	6	hypothetical protein TcasGA2_TC014113	3E-013	10	gi|270007520	76.6	42	482	83	9	7	0	441	5	1	2	N	FOR	Tribolium castaneum	Eukaryotic initiation factor 4A-II OS=Rattus norvegicus GN=Eif4a2 PE=1 SV=1	6E-013	10	sp|Q5RKI1|IF4A2_RAT	73.6	42	407	78	10	9	0	366
TI_asb-584	584	1	1	451	385	36	1	0	1	1	Unknown product	uk				451	120	KVAFKVKPLFVELLYXNLXLYFQGVYXXXFNLXPNFFXXL	5
TI_asb-585	585	1	1	1001	962	29	1	0	1	1	Nuclear protein contains WD40 repeats	uc	KOG	0	3.6	1001	450	SGMYNIKEKLLKYIGYAKFYFNKRPNNFIFLLFDYKTGFGFKKISNGLSKIKKKKGWISFLKFFSQKEYKSTFKIFTKTQKKGLIFPFQTWKKLRKNSLGLNFYSKKTPKKKFFWFKFGFFFFFFKEKNYPTSPPTLFLNQKKKKKKIFF	1	chloroquine resistance marker protein	6.4	1	gi|82704981	34.3	101	3604	29	3	71	5	3127	559	1	1	N	FOR	Plasmodium yoelii yoelii	DNA ligase OS=Buchnera aphidicola subsp. Cinara cedri GN=ligA PE=3 SV=1	1.9	4	sp|Q058C9|DNLJ_BUCCC	33.9	45	587	40	8	27	0	298
TI_asb-586	586	1	1	459		43	1	0	1	1	secreted salivary peptide precursor	s/	NR-LIGHT	1e-08	32.5	459	174	VVLRXCAAVVVACFAAAGFTFGTVPGAQIAAVPALAGCNAAFGTCEAACVAALLIPTP	2	putative secreted salivary peptide precursor	1E-008	10	gi|149689160	60.8	28	86	100	33	0	0	53	74	1	2	N	FOR	Triatoma infestans	Beta-galactosidase 3 OS=Arabidopsis thaliana GN=BGAL3 PE=1 SV=1	5.9	2	sp|Q9SCV9|BGAL3_ARATH	30	38	856	39	4	23	0	657
TI_asb-587	587	2	2	329		38	2	0	2	2	Unknown product	uk				329	159	IDIGKVRQRNNQSKGENSNTVGRRQPRSTKQTQSLFIKSHIKKAGTALSMATK	6	mannose-1-phosphate guanyltransferase alpha-B	9.9	2	gi|41053852	31.2	62	422	33	15	41	16	196	184	1	-3	N	REV	Danio rerio	Olfactory receptor 8D2 OS=Homo sapiens GN=OR8D2 PE=2 SV=1	2.1	4	sp|Q9GZM6|OR8D2_HUMAN	31.2	68	311	33	22	45	10	129
TI_asb-588	588	1	1	912	749	30	1	0	1	1	Unknown product	uk				912	270	LFLWRTLPMSMTLPCHYNSLNERNRNWERNWFKLLRQWLYIIGEFDIIDSNDLNHVKSLIPSILEKWTNYVVGLNIERAINSSYSTIYKR	3
TI_asb-589	589	7	7	766	732	84	0	7	7	-7	CG33695-PE isoform E isoform 1	uc	NR-LIGHT	1e-24	94.1	766	381	NCRKLVIMSMNSASKVGEIFTAAGAAFNKLAELTLQLHPTADSPSGAQIRSTLRKKAFEDAGLPTRQVMSGTSQTGAASSAMLATTGKSAEVTLNMLNAQETEVDIESMHDDVKLDYSTGGHDPVNP	1	similar to CG33695-PE, isoform E isoform 1	1E-024	10	gi|66501277	115	146	155	47	94	76	38	1	136	1	1	N	FOR	Apis mellifera	MLL1/MLL complex subunit C17orf49 OS=Homo sapiens GN=C17orf49 PE=1 SV=1	1E-008	4	sp|Q8IXM2|CQ049_HUMAN	60.5	91	172	42	53	52	36	1
TI_asb-590	590	1	1	984	717	21	0	1	1	-1	CG33695-PE isoform E isoform 1	uc	NR-LIGHT	2e-15	94.1	984	381	NCRKLXIMXMNSGXKXGEIXXXXGXXFXKLXELSLELYXXXDSPSGAQIRSTLRKKAFEDAGLPTRQVMSGTSQTGAASSAMLATTGKSAEVTLNMLNAQETEVDIESMHDDVKLDYSTGGHDPVNP	2	similar to CG33695-PE, isoform E isoform 1	2E-015	10	gi|66501277	85.9	146	155	38	94	90	38	1	110	1	2	N	FOR	Apis mellifera
[truncated: 97 more columns]

## Sheet: Class-distribution
Table X: Functional classification of transcripts from all contigs						Table Y: Functional classification of transcripts originating from up regulated contigs							Table Z: Functional classification of transcripts originating from down regulated transcripts
Class	Number of Contigs	Number of ESTs	EST's / Contig			Class	Number of Contigs	Number of ESTs	EST's / Contig				Class	Number of Contigs	Number of ESTs	EST's / Contig
Secreted	14	62	4.42			Secreted	3	10	2				Secreted	4	16	4
Nuclear regulation	5	8	1.6			Nuclear regulation	1	2	2				Nuclear regulation	1	3	3
Transcription factor	3	6	2			Transcription factor	1	2	2				Transcription machinery	1	11	11
Transcription machinery	9	25	2.77			Transcription machinery	2	4	2				Protein synthesis machinery	4	11	2.75
Protein synthesis machinery	25	42	1.68			Protein synthesis machinery	4	10	2.5				Protein export machinery	2	4	2
Protein export machinery	9	12	1.33333			Transporters/storage	4	9	2.25				Protein modification machinery	1	2	2
Protein modification machinery	19	27	1.42			Oxidant metabolism/detoxification	2	9	4.5				Transporters/storage	1	2	2
Proteasome machinery	2	2	1			Metabolism, carbohydrate	2	4	2				Oxidant metabolism/detoxification	1	7	7
Transporters/storage	10	22	2.2			Metabolism, lipid	1	3	3				Metabolism, carbohydrate	1	2	2
Oxidant metabolism/detoxification	6	23	2.83			Signal transduction	2	7	3.5				Signal transduction	3	20	6.66
Metabolism, carbohydrate	6	9	1.5			Extracellular matrix/cell adhesion	1	2	2				Extracellular matrix/cell adhesion	2	4	2
Metabolism, nucleotide	1	1	1			Cytoskeletal	2	6	3				Metabolism, energy	5	15	3
Metabolism, amino acid	2	2	1			Metabolism, energy	1	2	2				Unknown	9	33	3.9
Metabolism, lipid	10	15	1.5			Unknown	7	8	1.14				Unknown, conserved	7	19	8
Signal transduction	18	33	1.83			Unknown, conserved	4	13	3.25
Extracellular matrix/cell adhesion	7	17	2.42857			Immunity	1	2	2
Cytoskeletal	7	18	2.57			Secreted proteinase inhibitor	1	2	2				Total	42	149
Transposable element	3	3	1
Metabolism, energy	18	50	2.7
Unknown	126	288	2.28			Total	39	95
Unknown, conserved	54	104	1.92
Immunity	7	12	1.7
Viral	12	73	6.08
Nuclear export	1	1	1
Secreted proteinase inhibitor	6	14	2.33
Total	380	869
Singletons		253

## Sheet: contigs stats
Library name	TI_asb-fasta	TI-cds
Total number of sequences	380	370
Total number of residues	250362
Average length	664.78	351.32
Smaller than 100 bp	1	45
PolyA + polyT in	206
Larger sequence size	1305	1184
Smaller sequence size	72	33
(number of contigs)	TI_asb-fasta	TI-cds
< 50	0	0
51-100	1	45
101-200	7	59
201-300	7	45
301-400	19	42
401-500	41	52
501-1000	283	115
>1000	22	2
(number of bases)
< 50	0
51-100	74
101-200	1204
201-300	1454
301-400	6668
401-500	19608
501-1000	196897
>1000	24457

## Sheet: organism distrib
swissP	Number of contigs		nr-light	Number of contigs
Acanthamoeba polyphaga mimivirus	2		Acyrthosiphon pisum	22
Acidithiobacillus ferrooxidans (strain ATCC 53993)	1		Aedes aegypti	4
Aedes aegypti	4		Agrotis ipsilon multiple nucleopolyhedrovirus	1
Aethionema cordifolium	1		Anopheles darlingi	3
African swine fever virus (isolate Warthog/Namibia/Wart80/1980)	1		Anopheles gambiae str. PEST	6
Aliivibrio salmonicida (strain LFI1238)	1		Apis mellifera	10
Anopheles gambiae	6		Arabidopsis lyrata subsp. lyrata	1
Anopheles quadrimaculatus	3		Arabidopsis thaliana	3
Antheraea mylitta	1		Argas monolakensis	1
Antirrhinum hispanicum	1		Bombyx mori	6
Apis mellifera	3		Bombyx mori densovirus Zhenjiang	1
Arabidopsis thaliana	7		Bos taurus	3
Ashbya gossypii	1		Branchiostoma floridae	2
Aspergillus terreus (strain NIH 2624 / FGSC A1156)	2		Brugia malayi	5
Astasia longa	1		Caenorhabditis elegans	3
Bacillus halodurans	1		Cimex lectularius	4
Bacillus subtilis	2		Ciona intestinalis	1
Bacillus thuringiensis subsp. higo	1		Culex quinquefasciatus	6
Blattella germanica	1		Danio rerio	4
Bombyx mori	6		Daphnia pulex	7
Borrelia garinii	1		Drosophila melanogaster	6
Bos taurus	7		Escherichia coli	1
Buchnera aphidicola subsp. Baizongia pistaciae (strain Bp)	2		Escherichia coli MS 146-1	1
Buchnera aphidicola subsp. Cinara cedri	1		Escherichia coli MS 57-2	1
Buchnera aphidicola subsp. Schizaphis graminum	4		Escherichia coli TA143	1
Caenorhabditis elegans	6		Escherichia sp. 3_2_53FAA	1
Candida albicans	1		Fowlpox virus	1
Canis familiaris	1		Gallus gallus	2
Carabus granulatus	1		Glossina morsitans morsitans	1
Carsonella ruddii (strain PV)	1		Haemaphysalis qinghaiensis	2
Cavia porcellus	1		Harpegnathos saltator	1
Ceratitis capitata	2		Homo sapiens	4
Chinchilla lanigera	1		Hydra magnipapillata	1
Chlamydia trachomatis serovar L2b (strain UCH-1/proctitis)	1		Ixodes scapularis	3
Choristoneura biennis	1		Leishmania amazonensis	1
Cicadella viridis	1		Mus musculus	3
Clostridium kluyveri (strain ATCC 8527 / DSM 555 / NCIMB 10680)	1		Nasonia vitripennis	16
Clostridium phytofermentans (strain ATCC 700394 / DSM 18823 / ISDg)	1		Ornithodoros coriaceus	1
Coxiella burnetii	1		Pediculus humanus corporis	22
Cricket paralysis virus	2		Phlebotomus papatasi	1
Cynara cardunculus	1		Plasmodium berghei	6
Danio rerio	5		Plasmodium falciparum 3D7	10
Debaryomyces hansenii	1		Plasmodium knowlesi strain H	1
Dermatophagoides farinae	2		Plasmodium vivax	2
Dictyostelium discoideum	7		Plasmodium yoelii yoelii	5
Dipetalogaster maximus	2		Pseudomonas putida BIRD-1	1
Drosophila C virus (strain EB)	1		Rhipicephalus sanguineus	1
Drosophila grimshawi	1		Rhodnius prolixus	1
Drosophila melanogaster	29		Schistosoma japonicum	1
Drosophila pseudoobscura pseudoobscura	2		Schistosoma mansoni	5
Drosophila simulans	2		Simian immunodeficiency virus	1
Drosophila virilis	2		Slow bee paralysis virus	4
Drosophila yakuba	6		Solenopsis invicta	1
Emericella nidulans	1		Streptococcus cristatus ATCC 51100	1
Enterobacteria phage T4	1		Streptococcus mutans NN2025	1
Escherichia coli	1		Streptomyces viridochromogenes DSM 40736	1
Escherichia coli (strain K12)	1		Strongylocentrotus purpuratus	2
Escherichia coli (strain SE11)	1		Sus scrofa	3
Felis catus	1		synthetic construct	3
Flavobacterium psychrophilum (strain JIP02/86 / ATCC 49511)	1		Toxoplasma gondii GT1	2
Gallus gallus	9		Toxoplasma gondii ME49	1
Gryllotalpa orientalis	1		Toxoplasma gondii VEG	1
Herpetosiphon aurantiacus (strain ATCC 23779 / DSM 785)	1		Triatoma brasiliensis	2
Homarus gammarus	1		Triatoma dimidiata	5
Homo sapiens	27		Triatoma infestans	40
Human coronavirus 229E	1		Triatoma matogrossensis	11
Kluyveromyces lactis	1		Triatoma rubrovaria	1
Lactobacillus acidophilus	1		Triatoma virus	10
Lactobacillus pentosus	1		Triatoma vitticeps	2
Lathyrus vestitus	1		Tribolium castaneum	39
Legionella pneumophila (strain Lens)	1		Trypanosoma brucei	1
Lepidoglyphus destructor	1		Trypanosoma brucei gambiense DAL972	1
Listeria monocytogenes	1		Trypanosoma cruzi	1
Locusta migratoria	1			330
Lucilia cuprina	1
Macaca fascicularis	3
Manduca sexta	2
Methanobacterium thermoautotrophicum	1
Murex brandaris	1
Mus musculus	19
Mycobacterium tuberculosis	1
Mycoplasma genitalium	1
Mycoplasma hyopneumoniae (strain 7448)	1
Neurospora crassa	2
Nicotiana tabacum	1
Nostoc sp. (strain PCC 7120 / UTEX 2576)	1
Odontella sinensis	1
Oncorhynchus mykiss	1
Oryctes rhinoceros	1
Oryza sativa subsp. japonica	1
Papilio polyxenes	1
Pelagibacter ubique	1
Plasmodium falciparum	1
Plasmodium falciparum (isolate 3D7)	4
Pongo abelii	5
Potato virus S (strain Peruvian)	1
Pseudomonas stutzeri (strain A1501)	1
Pyrrhocoris apterus	2
Rattus norvegicus	16
Rhipicephalus sanguineus	1
Rhizobium meliloti	1
Rice tungro spherical virus (strain A)	2
Rickettsia prowazekii	2
Riemerella anatipestifer	2
Rinderpest virus (strain L)	1
Saccharomyces cerevisiae	6
Saguinus oedipus	1
Saimiri sciureus	1
Sarcophaga peregrina	2
Schistocerca americana	2
Schistocerca gregaria	1
Schistosoma japonicum	1
Schizosaccharomyces pombe	5
Shigella dysenteriae serotype 1 (strain Sd197)	1
Simian immunodeficiency virus agm.vervet (isolate AGM3)	1
Solibacter usitatus (strain Ellin6076)	1
Spodoptera frugiperda	4
Sputnik virophage	1
Staphylococcus aureus (strain NCTC 8325)	1
Streptococcus agalactiae serotype V	1
Streptococcus uberis (strain ATCC BAA-854 / 0140J)	1
Streptomyces griseus subsp. griseus (strain JCM 4626 / NBRC 13350)	1
Sulfurimonas denitrificans (strain ATCC 33889 / DSM 1251)	1
Synechococcus sp.	1
Synechococcus sp. (strain CC9311)	1
Taenia solium	1
Tenebrio molitor	1
Thalassophryne nattereri	2
Triatoma pallidipennis	1
Trypanosoma brucei brucei	2
Wigglesworthia glossinidia brevipalpis	2
Xenopus laevis	3
Xenopus tropicalis	5
Yarrowia lipolytica	2

## Sheet: Rhodnius matches
Contig link	Order number	Number of sequences and link to TSA file	Number of sequences	Lenght	PolyA at	Qual and link	Infected	Not Infected	Inf - nInf |H-I|	Annotation	Class	Database	E value	Coverage	Length of nt seq	Larger orf (nt)	Larger pep	Frame of larger ORF	Best match to NR-LIGHT protein database	E value	Number of matches	Match	Score	Extent of match	Length of best match	% identity	% Coverage	Mismatches	Gaps	First residue of match	First residue of sequence	Number of segments	Frame	Frame shift?	Orientation	Species of best match	Best match to SWISSP protein database	E value	Number of matches	Match	Score	Extent of match	Length of best match	% identity	% Coverage	Mismatches	Gaps	First residue of match	First residue of sequence
TI_asb-448	448	2	2	876	762	62	1	1	0	Unknown product	uk				876	693	IKMKLITLFLFIGPSFGVDIITKDIGESAWDEIIDQSIETARSAIIDNHLDLIHLPNLNQEFHKKVIGIPFYASVKIPDAEIWDISSVNRRGPVTLQQDDTTGNITLSTSLGLEKLVLNCNKLYLYLLGITVSGSMNIDCSSNEIEISLSLITDKESRCKAHINWARVTKFQDFTIQIAPSNVSNWLAKHIISFILNKFPSKITGIINFRLADELNAGIGNIDVCSYLHFR	2	aldehyde dehydrogenase 2, like	6.8	8	gi|292614411	33.9	46	516	34	9	30	2	326	74	1	2	N	FOR	Danio rerio	Actin-related protein 9 OS=Oryza sativa subsp. japonica GN=ARP9 PE=2 SV=1	0.23	5	sp|Q0JF03|ARP9_ORYSJ	36.6	118	586	26	20	87	14	123	68
TI_asb-562	562	1	1	830	807	47	1	0	1	Unknown product	uk				830	669	HSALAGESFKGSNMMYWTVFGIFIASAACTQIDKGNSVIVNEFLDQTLSRINNEPNIDSKLNISKIHVDKYSFENGVLTNLKSWKRSGDTIMWSNSRKVSISAHVILQEMVFTADEMLIESEKATSPVLKIKDNLLYFLFQVELDSKSGCKVTDHIVSWKQLDGTIFSNNPKYNNKNFSLTQAELKHLNKPSNNEQVLKFLLENMIICPQIPKNLFLFERGKT	2	ACYPI37407	0.051	10	gi|239789926	40.8	159	214	23	74	122	5	21	206	1	2	N	FOR	Acyrthosiphon pisum	Reticulocyte-binding protein PFD0110w OS=Plasmodium falciparum (isolate 3D7)	0.48	6	sp|P86148|RBP1_PLAF7	35.4	193	2971	20	6	153	20	1626	161
TI_asb-262	262	4	4	706		79	3	1	2	Unknown product	uk				706	645	IDQYKMFYLIIMASLLVSTPLSGADQAEDRTSKIRAVNDLHMWIATYINMNYVLFNDPTSFISSIDLSELHLVSNQTDVKVSLTELSMPVNLLLESTTNDVRNMCSTFKISQPIEVSGQYSATGKLDGQTISSSGAFRMNIKKMVLTGRIYVMPIDTTAKLIEDMFGLKKFDLLEHHQAIRPNFQNIPAMLKNSFNKLIELEVSKLIKHGIKMFN	2	hypothetical protein	0.11	10	gi|68063775	39.3	124	581	27	21	90	5	58	329	1	2	N	FOR	Plasmodium berghei	PAB-dependent poly(A)-specific ribonuclease subunit PAN2 OS=Candida albicans	0.13	9	sp|Q5APK0|PAN2_CANAL	37	79	1190	25	7	59	0	346	170
TI_asb-86	86	1	1	782	764	39	1	0	1	Unknown product	uk				782	765	TVSIVWCSFVTHSLSYNSHPVALLPQNIILYTYNYNTCGGENLFLFIKSLLNFFFFFEETNILKQKKMKPPTPSTPQSRDIFGAEFSGTPSHHRVLKPPGGGSSDIFGTNSAQETNVRRVRNHLASNVFLSDEPSPAATMMNSGNGASAAVAASTTLAKQQSEHVNGDNTDGGHNGEQQAMVNGNSQPVMNGNRTTNNGAPSKNPKNSCSHLADFLLVFGENVLKVTSSSNNCNKHSKKNYSSPPLKKKEKKKKK	1	hypothetical protein	6E-006	10	gi|156549214	45.4	118	144	31	82	81	7	21	295	2	1	Y	FOR	Nasonia vitripennis	Microtubule-associated protein Jupiter OS=Drosophila melanogaster GN=Jupiter	6E-005	10	sp|Q9I7K0|JUPIT_DROME	48.1	51	208	45	25	28	0	21	295
TI_asb-424	424	6	6	607	575	91	2	4	2	Unknown product	uk				607	357	ITFLTQHNFYPNKKMRTVLCLLAALTTVMAAHESIVCPPDFCNTVQCSAELTEESCDGEFFPNSSFCECCPTCITYIKPGGYCNEALHKIFSALYLRVHRCSPGYHCVRNICIPKNNFI	2	hypothetical protein	0.021	10	gi|189240937	41.2	83	104	28	80	59	0	22	119	1	2	N	FOR	Tribolium castaneum	Fungal protease inhibitor-1 OS=Antheraea mylitta GN=fpi-1 PE=1 SV=1	0.27	10	sp|B0JFB8|FPI1_ANTMY	35.4	84	105	21	80	66	6	21	119
TI_asb-512	512	1	1	559		45	0	1	1	Unknown product	uk				559	552	ASLKEMIIQLLPFLVFCGLTFASQGQGPFEEKVEPDYQETELASAEDSVSENSDSENNAIPDEWRPMLLHYKQLKEIVINLNKGVDKVLDFIREAFGALGEVSIPLPDITKSIGHSPYAGTINVTNGYFKNPTTIERTGDVEILVSNDTTISLKVGVGLKEVELGFGSYHLDILNVHQHGTISA	3	hypothetical protein TcasGA2_TC013968	0.25	9	gi|270007404	37.4	106	280	24	38	80	4	68	243	1	3	N	FOR	Tribolium castaneum	Putative ATP-dependent RNA helicase D1133L OS=African swine fever virus (isolate	0.67	10	sp|P0C9A6|VF113_ASFWA	33.9	64	1133	32	6	43	1	924	198
TI_asb-389	389	1	1	584		49	1	0	1	Unknown product	uk				584	384	REGNDADGVLTPKFLKEWPLPNSHSGKYWSLIPLKISPKKLQVVANDNSLNGTTYSLINNNCQHWVKVAAETISSDLADSLDKYRTSDEVPIVEQAVLGTWASSKATSSNVFSSLLGIAKAGWDAIEQ	1	structural protein	0.21	10	gi|189007679	37.7	90	1160	24	8	68	0	1025	187	1	1	N	FOR	Bombyx mori densovirus Zhenjiang	Spike glycoprotein OS=Human coronavirus 229E GN=S PE=1 SV=1	0.96	6	sp|P15423|SPIKE_CVH22	33.5	77	1173	31	7	53	0	462	217
TI_asb-50	50	1	1	680	658	50	1	0	1	Unknown product	uk				680	675	LSYVSTTLSSSCLFVGVAVGHILTKRDNNAEALIDEFIYETVQDLQKNHGDQITIPDIDEKFEKKVAFFKIRGEFITKDGWLRNLTTLQRMAPSEFIQEGNSIILGITLGLNELEFGFKQYSAEILHIGIHGSMRVSVQKNSLYMHLNMMFDDNGGCKTTLDKVTVKELNGFHADMTGLGRDADFIYSMVASLLANKYHKNIERSLTQRLTPVLGDVLTKKKKKK	2	hypothetical protein	4E-010	10	gi|156544907	67.4	182	1493	23	12	139	0	473	65	3	2	N	FOR	Nasonia vitripennis	Mite allergen Lep d 7 OS=Lepidoglyphus destructor PE=1 SV=1	0.004	10	sp|Q9U1G2|ALL7_LEPDS	42	190	216	20	88	152	2	27	80
TI_asb-563	563	1	1	504		40	1	0	1	Unknown product	uk				504	288	PNIDSKLNISKIHVDKYSFENGVLTNLKSWKRSGDAIMWSNSRKVSISAHVILQEMVFTADEMLIESEKATSPVLKIKDNLLYFLFQVELDSKSGC	1	zinc finger protein GLI1	3.6	2	gi|170035164	33.1	40	670	37	6	25	0	176	19	1	-1	N	REV	Culex quinquefasciatus	Soluble pyridine nucleotide transhydrogenase OS=Pseudomonas stutzeri (strain	4.5	2	sp|A4VMU6|STHA_PSEU5	30.8	41	464	41	9	24	5	230	199
TI_asb-524	524	3	3	787		79	0	3	3	Unknown product	uk				787	633	VAVVGCCRADTVVLNQLMDQVLDSVKTVITQAGMDHIKIPDMNNKWRYRWHFVKLSGNAGCQDGEASSLASIRRTGDTTLQTAGNHAVLKVRIGLGNLEFHFGRCRFKAKRLFSVSSRVKAKVKSNSIELQISLTGQGPQCVASLDHVVLDKFGGLHVDTGGGVLHKIENKIIQWASNHFHDKIVKIVNAKLADAVRKSLPKVDLCSRIPH	3	hypothetical protein	6E-008	8	gi|156544907	60.5	192	1493	23	13	146	3	899	42	2	3	N	FOR	Nasonia vitripennis	Mite allergen Der f 7 OS=Dermatophagoides farinae GN=DERF7 PE=1 SV=1	1.7	5	sp|Q26456|ALL7_DERFA	33.5	86	213	23	40	66	0	26	33
TI_asb-288	288	2	2	822		59	1	1	0	Unknown product	uk				822	630	PQYPENDQQYQSTMMPFFLILLSALVLAQGLKEEEFIPRTPVENDAEALLGPLLKEYFEFQNLIEEIRQHQETQQISSLVLAEQIASVPEHCLPTDMPDIKPLDSDACNNLKKSLAKAVSLAQNIGSWAYQAGLKICGKIISFHHCANINPFTSLKCVLNHIKDLKETIQGYKPDVLNFKEEIVALAKELKLEFNECVKNRRKLKLQLKR	1	cellular myosin heavy chain	0.065	7	gi|256082567	40.4	133	542	21	25	105	1	204	193	1	1	N	FOR	Schistosoma mansoni	GRIP and coiled-coil domain-containing protein PFC0235w OS=Plasmodium falciparum	0.62	10	sp|O97237|YGCC1_PLAF7	35	54	1139	33	5	36	0	778	415
TI_asb-465	465	3	3	598		73	1	2	1	Unknown product	uk				598	354	PPYHQIVYQLIHQFWKPRTRMLVRLWRKKYKRVWILVKKITDWALKTGLTILKEIYHLIHCGNINPITAMKCVVQKINDIKAFIGANKPIALEYKDEIVTLAKELGLALKQCLGAQKK	2	hypothetical protein	3.2	6	gi|115709019	33.9	81	532	27	15	59	3	41	64	1	1	N	FOR	Strongylocentrotus purpuratus	Structural protein V8 OS=Sputnik virophage PE=1 SV=1	0.78	10	sp|B4YNE8|V8_SPTNK	33.9	45	184	28	24	32	0	85	154
TI_asb-38	38	3	3	681		75	0	3	3	Unknown product	uk				681	297	TTLSHSLSSSHALFSHSLKHYADSSSSTSSSSSSSPSPKSSPISSPTKLVIIFLFALNLFFLFVKDFFITFTLSIFFLLLCFLHILSFVLCWPFRSFYF	4	hypothetical protein	1E-005	7	gi|66506802	52.4	43	116	65	37	15	0	1	25	1	1	N	FOR	Apis mellifera
TI_asb-132	132	1	1	382		52	0	1	1	Unknown product	uk				382	231	YRRVMATFFGEVILPTSRVFFDDYDDSDNEEEYQVERTLELKLLDEKSLKHEFDLLIIVEGIVCRGFVDLYLINANT	3	odorant receptor 38	0.53	1	gi|299528647	35.4	60	414	36	14	38	0	41	2	1	2	N	FOR	Nasonia vitripennis	Putative CDC123-like protein L884 OS=Acanthamoeba polyphaga mimivirus	8.0	1	sp|Q5UQX4|YL884_MIMIV	29.3	54	323	27	17	39	0	56	24
TI_asb-391	391	1	1	415		39	0	1	1	Unknown product	uk				415	345	SFFTFRGVKCLITSYFYAILLTHCIGIKSDEKNNEEIESPSDIASVSKFIKEFHRKLEEDLYPIVDYDTSNDSDMNPPYINDNVTNSANKSGSSEKNVTSLVNCNTERKPGGLTV	1	hypothetical protein	0.081	10	gi|256081126	38.1	52	750	32	7	35	0	234	235	1	1	N	FOR	Schistosoma mansoni	DNA double-strand break repair rad50 ATPase OS=Methanobacterium	0.32	10	sp|O26640|RAD50_METTH	33.9	93	837	25	11	69	16	369	148
TI_asb-84	84	4	4	784		78	0	4	4	Unknown product	uk				784	555	VKTMDKITSSDKFKQLRINISTSVRSNNLRCSNNSENHRKKVGLKLTEQCERISGSKAARVSPRRSQETKKYDFNNLQCTFRNKTSSDKIVPPNNNEPTINPGRRQATTVHRENNSYKFDEKKTLMDKNERDSSGFLKPLNPAPRRTVHDPSVNEHLYSTKDQSGFLKPVNPGSNRSPHEHLVTE	3	conserved Plasmodium protein, unknown function	1E-004	10	gi|124511844	49.3	106	2206	28	5	76	0	632	255	1	3	N	FOR	Plasmodium falciparum 3D7	Myosin-G heavy chain OS=Dictyostelium discoideum GN=myoG PE=3 SV=1	0.051	10	sp|Q86AC8|MYOG_DICDI	38.5	164	3446	20	5	131	4	1547	279
TI_asb-515	515	1	1	641	615	40	0	1	1	Unknown product	uk				641	369	AWDSEACNDLTKSLWKVWDLAIDINNWAFEVGAKVCGKFFGLIHCANINPITAIKCLVNDIKELKSIINLYKPDVMKYENKIVALGKELKVEAHKCFEVHGKTQALAEQIVAEAQLCVESRNH	2	ACYPI006488	2.2	7	gi|239791045	34.7	73	341	36	21	46	0	167	197	1	2	N	FOR	Acyrthosiphon pisum	Putative dioxygenase subunit beta yeaX OS=Escherichia coli (strain K12) GN=yeaX	2.6	10	sp|P76254|YEAX_ECOLI	32.3	59	321	28	18	42	0	113	306
TI_asb-310	310	1	1	555		39	0	1	1	Unknown product	uk				555	459	CNMELNKLNIVCLIFNLIIVCHAYNEQLSSKLDKMIRILNDIQSEELEHALSIIEQKKKLAKENSDAAVKCCEREGNKYLDQIENNNVAYASEFYKKLNGYWKHLENTESEKVEQAMKETLESLFEKTLTRLQTQGEIITLAFVAKANKCIGF	1	Viral A-type inclusion protein repeat containing protein	0.029	10	gi|170594575	40.4	106	1051	28	10	76	0	784	79	1	1	N	FOR	Brugia malayi	Spindle assembly checkpoint component mad1 OS=Schizosaccharomyces pombe GN=mad1	0.027	10	sp|P87169|MAD1_SCHPO	38.5	109	689	25	16	81	14	54	88
TI_asb-178	178	1	1	497		47	1	0	1	Unknown product	uk				497	468	PENDQQYHKSSHVDFLILLSALVLPPWLKEDVFPRTPVENDAEGLLGPLLTSYFELKNLIEEIKQHQETQEISSLVLAEKIASVPEHCLPTDTPHIKAWDSDACNNLKKSLAKAVTLAQNIGSWAYQAGLKICGKVINLLHCGNIDLVKAIKCIYK	3	chromosome partitioning protein ParB	2.6	10	gi|270265402	33.5	72	385	31	19	49	8	129	93	1	3	N	FOR	Serratia odorifera 4Rx13	50S ribosomal protein L25 OS=Clostridium phytofermentans (strain ATCC 700394 /	1.1	10	sp|A9KSE6|RL25_CLOPH	32.7	77	193	33	40	51	7	94	162
TI_asb-101	101	1	1	618	478	16	1	0	1	Unknown product	uk				618	459	NPFIFFFFFFSPQKNHPPYYKFTFFPNSILFSLIPFNFFTFLFSKFILHPPLSSNFIFTFIYIXFFFTYTHIXPFIPIFIISXXYXLNPNSXSFKXIXIPKIILLPSXINSXXXILXNXFXLXNHPSFXXNSXXIFKNPTFFXNFSSISXIXI	6																			ATP synthase protein 8 OS=Trichophyton rubrum GN=ATP8 PE=3 SV=1	4.1	1	sp|Q36838|ATP8_TRIRU	31.6	25	48	52	52	12	0	8	365
TI_asb-334	334	1	1	498		50	1	0	1	Unknown product	uk				498	318	WDVAVFSRPIPRHLVGSLAGHCGLWRHLYIMELMPDPFCRVCETEEETPIHLKTDCLGFEEIRFRTFGRSRMSVEELRLFPLKVIVRFIRTVVNLRWIKSGSGFLF	3	Lian-Aa1 retrotransposon protein	1E-004	10	gi|2290213	48.1	81	1189	32	7	55	0	1107	57	1	3	N	FOR	Aedes aegypti	Immunoglobulin G-binding protein A OS=Staphylococcus aureus (strain NCTC 8325)	1.5	10	sp|P02976|SPA_STAA8	32.3	32	516	43	6	18	0	328	267
TI_asb-588	588	1	1	912	749	30	1	0	1	Unknown product	uk				912	270	LFLWRTLPMSMTLPCHYNSLNERNRNWERNWFKLLRQWLYIIGEFDIIDSNDLNHVKSLIPSILEKWTNYVVGLNIERAINSSYSTIYKR	3
TI_asb-205	205	1	1	583		40	1	0	1	Unknown product	uk				583	294	QQLLVHHTPYTSSSIQVRHLHHMTNRFQQFXAAQQMYPHVGVGTAMYSQAASPAGYYASAFTPMQAYYHPLAYTYPQXQLRPTNHDSKLDSMEVQRFD	1	hypothetical protein LOC425772	2.4	2	gi|150247146	34.3	40	505	47	8	21	1	154	157	1	-2	N	REV	Gallus gallus	Structural maintenance of chromosome protein 3 OS=Dictyostelium discoideum	6.2	2	sp|Q552D9|SMC3_DICDI	30.8	60	1437	31	4	41	0	397	154
TI_asb-437	437	1	1	490	445	40	0	1	1	Unknown product	uk				490	279	KKPCKSDVSQPPYVTPSAPSTTSTIILSTPTPAPIKPECDKENDKRGVKNDCHRYQVCKGGKWIDEKCSVWGKFDIITKECFYFQTWKAKCEQ	1	hypothetical protein AND_13361	1.1	10	gi|312375952	34.7	31	1086	45	3	17	0	692	151	2	1	N	FOR	Anopheles darlingi
TI_asb-264	264	2	2	662		69	1	1	0	Unknown product	uk				662	525	FGEMCCQQGFDANPSMNNMAKSFLNGGLKEHISGYKYSRLQQTPKYLRLAVVLTIMAVITTFYLLGDLTTDGYLSIIRHMEGFDADDRSVFFTYLNSSMAGRPPGGYIVWSPSCRIPDVPILHDSIRKFVYSVKPVHCNNTPHLTSVKKENGSHILRVHKDIAVKYYKDAMPKCC	3	conserved hypothetical protein	7E-005	10	gi|170028035	49.7	79	626	32	13	53	4	16	438	1	3	N	FOR	Culex quinquefasciatus	Poly(ADP-ribose) glycohydrolase ARH3 OS=Gallus gallus GN=ADPRHL2 PE=2 SV=1	0.72	3	sp|Q5ZI51|ARHL2_CHICK	34.3	99	367	27	27	72	14	135	150
TI_asb-541	541	1	1	565		56	0	1	1	Unknown product	uk				565	405	FFFNKISNYSVFYTMEDRDLLNSVNIHDRLHATKLTPLPDDEEDTDDLINTQYLNLNRLPENLHKVQLVNEQLTQEILSNHHVVELATNNDYSHTNTSHHQHDTTNPNVQQAGANVSTTNPTEQFYDEEEELLAN	2	pro-neuregulin-1, membrane-bound isoform-like	0.26	10	gi|311272401	37.4	80	563	28	14	57	3	224	326	1	2	N	FOR	Sus scrofa	Pro-neuregulin-1, membrane-bound isoform OS=Xenopus laevis GN=nrg1 PE=2 SV=1	0.037	10	sp|O93383|NRG1_XENLA	38.1	70	677	28	10	50	3	321	335
TI_asb-228	228	1	1	319		28	1	0	1	Unknown product	uk				319	159	PNIHKKKNKXFIYNKIKKNSKTITXIKLSIIKFPNXILQIYFNXXNIXKYLYF	4
TI_asb-100	100	2	2	739	713	69	1	1	0	Unknown product	uk				739	240	LFSVVYFTTNYYRNMLIGTCSRYIVGGKAVQTVYWRAQPKTSNGQTVNRIIKTKKTVLFPASDHPRPNITTSIRQIYNGS	2	similar to Tubulin alpha-6 chain (Alpha-tubulin 6) (Alpha-tubulin isotype	0.001	8	gi|110763493	45.8	58	542	43	11	33	0	472	92	1	2	N	FOR	Apis mellifera	Putative sterigmatocystin biosynthesis protein stcO OS=Emericella nidulans	2.0	1	sp|Q00710|STCO_EMENI	33.1	38	297	42	13	22	2	26	170
TI_asb-243	243	1	1	403		28	1	0	1	Unknown product	uk				403	246	YIIFHLGLPQGRLPAASSRATDLVYGKRKGIAKMRLTFIILLSAVYSCLAGPVYPQQELPKAQKLYITDDMKMAMVKDLQNE	1	similar to chondroitin sulfate proteoglycan 3, partial	4.5	3	gi|198415233	32.3	55	1487	34	4	36	0	1269	205	1	1	N	FOR	Ciona intestinalis
TI_asb-478	478	1	1	674		45	0	1	1	Unknown product	uk				674	345	CIFHHLLAQQAHVAALGLFNNYLPLHLNFSVRYAYIEVPHIFSHAVPPPLGRTPSGDPSYPFLRSSCPPFCGQTTLAAALLQYVYEVILISSYASPYDFCCHVPLNVLLGIANFM	2	conserved hypothetical protein	7.2	3	gi|221488229	33.1	31	1739	41	2	18	0	349	350	1	2	N	FOR	Toxoplasma gondii VEG	Zinc finger homeobox protein 2 OS=Homo sapiens GN=ZFHX2 PE=2 SV=3	3.7	1	sp|Q9C0A1|ZFHX2_HUMAN	32	30	2572	56	1	13	0	1640	355
TI_asb-85	85	1	1	642		52	1	0	1	Unknown product	uk				642	297	ICYFKFSFLFSTLHKLRDSGFCYYTLLLLKAKTILLTSSSASSSWTLIICITFVFTIINYIAPKSVRNIYLFSFKFFIFLLKIKKNIKKKKSSSIFVCC	4	hypothetical protein TcasGA2_TC005990	2E-006	10	gi|270011899	55.1	48	230	56	21	21	0	180	2	1	2	N	FOR	Tribolium castaneum	Protein transport protein Sec31A OS=Mus musculus GN=Sec31a PE=1 SV=2	1.5	10	sp|Q3UPL0|SC31A_MOUSE	33.1	48	1230	31	4	33	0	1183	2
TI_asb-158	158	1	1	280	254	40	1	0	1	Unknown product	uk				280	180	PISLWRVLCFAGLRHDCTLTSYLIFNASLTSPPLGWDLIVSHRYFKLINPRGGQMRNTLN	5	hu li tai shao	1E-006	10	gi|270002882	53.9	39	1367	56	3	17	0	1	139	1	1	N	FOR	Tribolium castaneum	Protein hu-li tai shao OS=Drosophila melanogaster GN=hts PE=1 SV=2	9E-004	3	sp|Q02645|HTS_DROME	42.4	35	1156	54	3	16	0	2	151
TI_asb-435	435	2	2	741		69	0	2	2	Unknown product	uk				741	303	YSITPKLIGLGYYSYSNFIKINIYIIPVSKKVDVFNAANSVDNMLWEPDLVKSTVRRNRKNKSVFHTKNCSFCRLIHPVTNYTIWKQMGILHSFTHFGNAF	4	hypothetical protein	1.7	4	gi|82540149	35.4	130	457	25	28	97	10	163	55	1	-1	N	REV	Plasmodium yoelii yoelii	FACT complex subunit SPT16 OS=Dictyostelium discoideum GN=spt16 PE=3 SV=1	9.9	1	sp|Q54S43|SPT16_DICDI	30.8	51	1072	31	5	35	3	90	112
[truncated: 92 more columns]
