# Supplementary material for: Differential Expression Profiles in the Midgut of Triatoma infestans Infected with Trypanosoma cruzi
Source: PLoS One. 2013 May 2;8(5):e61203. doi: 10.1371/journal.pone.0061203 (PMC3642171; doi:10.1371/journal.pone.0061203)
Supplement: Data S2 — (TI-S2) Hyperlinked excel file with coding sequence information. (XLSX) [file pone.0061203.s002.xlsx]

## Sheet: <5%X
Protein name	Order Number	First residue	Seq size	%X	CDS name	Seq size	14 N's?	ATG?	*	Infected	Not Infected	Inf - nInf |H-I|	Description	uk	database	Evalue	coverage	Best match to NR-LIGHT protein database	E value	Match	Score	Extent of match	Length of best match	% identity	% Coverage	Mismatches	Gaps	First residue of match	First residue of sequence	Number of segments	Frame	Frame shift?	Orientation	Species of best match	Best match to SWISSP protein database	E value	Match	Score	Extent of match	Length of best match	% identity	% Coverage	Mismatches	Gaps	First residue of match	First residue of sequence	Number of segments	Species of best match	Best match to PREV-RHOD-PEP database
TI-549	549	M	121	0	TI-549	362		ATG		1	2	1	Unknown product	uk				transcription factor IIIA - human (fragment) gi|551535|gb|AAA21873.1|	5.1	gi|7443519	32	90	338	25	27	69	10	94	17	1		N	FOR	Homo sapiens
TI-457	457	M	113	0	TI-457	342		ATG	*	2	2	0	fatty acid-binding lipocalin	met/lipd	NR-LIGHT	1e-43	100	fatty acid-binding lipocalin	1E-043	gi|263173263	177	108	109	77	100	24	0	1	5	1		N	FOR	Cimex lectularius	Fatty acid-binding protein, muscle OS=Schistocerca gregaria PE=1 SV=2	3E-027	sp|P41496|FABPM_SCHGR	120	111	134	57	84	48	1	22	1	1	Schistocerca gregaria	Contig18021_45
TI-455	455	S	41	0	TI-455	126			*	1	1	0	Unknown product	uk
TI-448	448	I	231	0	TI-448	696			*	1	1	0	Unknown product	uk				hypothetical protein PsyrptK_26593	0.76	gi|302063566	36.6	52	177	37	30	36	5	58	41	1		N	FOR	Pseudomonas syringae pv. tomato NCPPB 1108															Contig17914_3
TI-446	446	Y	16	0	TI-446	51			*	0	1	1	Unknown product	uk
TI-429	429	G	57	0	TI-429	174			*	2	3	1	cytochrome oxidase subunit 2	met/energy	NR-LIGHT	8e-09	25.5	cytochrome oxidase subunit 2	8E-009	gi|149689096	61.2	56	223	56	26	25	0	5	1	1		N	FOR	Triatoma infestans	Cytochrome c oxidase subunit 2 OS=Anopheles quadrimaculatus GN=COXII PE=3 SV=1	2E-006	sp|P33505|COX2_ANOQU	51.2	56	228	43	25	32	0	8	1	1	Anopheles quadrimaculatus
TI-426	426	P	73	0	TI-426	222			*	2	2	0	capsid protein precursor Triatoma virus	vir/	NR-LIGHT	3e-31	8.4	capsid protein precursor	3E-031	gi|20451030	135	72	868	95	8	3	0	796	1	1		N	FOR	Triatoma virus
TI-425	425	N	211	0	TI-425	636			*	3	3	0	Unknown product	uk				late embryogenesis abundant domain-containing protein, putative	3.6	gi|221485238	33.9	58	517	31	11	43	4	431	90	1		N	FOR	Toxoplasma gondii GT1															Contig7471_2
TI-412	412	M	208	0	TI-412	627		ATG	*	1	1	0	Unknown product	uk				Bombyrin	5E-008	gi|112983654	60.1	159	201	28	80	119	11	20	33	1		N	FOR	Bombyx mori	Apolipoprotein D OS=Macaca fascicularis GN=APOD PE=2 SV=1	4E-005	sp|Q8SPI0|APOD_MACFA	48.1	163	189	29	87	125	20	23	31	1	Macaca fascicularis	Contig17512_3
TI-288	288	P	210	0	TI-288	633			*	1	1	0	Unknown product	uk				hypothetical protein C41A3.1	0.43	gi|17550940	37	78	7829	31	1	56	4	4592	83	1		N	FOR	Caenorhabditis elegans															Contig7471_2
TI-264	264	M	161	0	TI-264	480		ATG		1	1	0	Unknown product	uk				conserved hypothetical protein	3E-005	gi|170028035	50.1	78	626	32	13	53	4	16	87	1		N	FOR	Culex quinquefasciatus															Contig10370_3
TI-263	263	E	35	0	TI-263	108			*	1	1	0	Unknown product	uk
TI-127	127	W	51	0	TI-127	156			*	1	1	0	Unknown product	uk
TI-108	108	R	20	0	TI-108	63			*	1	1	0	Unknown product	uk
TI-102	102	L	85	0	TI-102	258			*	1	1	0	10 kDa heat shock protein Pediculus humanus corporis	pm	NR-LIGHT	7e-33	76.1	10 kDa heat shock protein, putative	7E-033	gi|242016119	141	82	109	80	76	16	0	27	2	1		N	FOR	Pediculus humanus corporis	10 kDa heat shock protein, mitochondrial OS=Schistosoma japonicum GN=SJCHGC01960	1E-022	sp|Q5DC69|CH10_SCHJA	104	81	102	61	80	32	1	20	2	1	Schistosoma japonicum	Contig17588_10
TI-100	100	M	66	0	TI-100	201		ATG	*	1	1	0	Unknown product	uk				hypothetical protein TcasGA2_TC000791	0.001	gi|270001890	44.3	50	68	44	75	30	5	6	2	1		N	FOR	Tribolium castaneum															Contig18015_38
TI-95	95	V	25	0	TI-95	78			*	0	1	1	Unknown product	uk
TI-9	9	M	209	0	TI-9	625		ATG		0	1	1	4-hydroxyphenylpyruvate dioxygenase Aedes aegypti	uc	NR-LIGHT	1e-89	54.8	4-hydroxyphenylpyruvate dioxygenase	1E-089	gi|157105932	331	208	381	73	55	56	0	1	1	1		N	FOR	Aedes aegypti	4-hydroxyphenylpyruvate dioxygenase OS=Rattus norvegicus GN=Hpd PE=1 SV=3	2E-071	sp|P32755|HPPD_RAT	268	208	393	59	53	85	0	1	1	1	Rattus norvegicus	Contig18037_18
TI-89	89	N	11	0	TI-89	36			*	1	3	2	Unknown product	uk
TI-84	84	V	186	0	TI-84	557				0	4	4	Unknown product	uk				conserved Plasmodium protein, unknown function	3.4	gi|124511844	33.5	56	2206	33	3	41	5	649	29	1		N	FOR	Plasmodium falciparum 3D7															Contig17527_16
TI-8	8	H	191	0	TI-8	576			*	0	1	1	3-hydroxyacyl-CoA dehydratase 2	met/lipd	SWISSP	6e-35	74	ptpla domain protein	3E-049	gi|170050795	196	182	232	54	79	84	0	44	9	1		N	FOR	Culex quinquefasciatus	3-hydroxyacyl-CoA dehydratase 2 OS=Bos taurus GN=PTPLB PE=2 SV=2	6E-035	sp|Q2KIP8|HACD2_BOVIN	146	187	254	40	74	112	0	64	2	1	Bos taurus	Contig17896_130
TI-78	78	M	233	0	TI-78	702		ATG	*	0	1	1	translocon-associated protein subunit alpha Tribolium castaneum	pe	NR-LIGHT	1e-57	71	similar to translocon-associated protein subunit alpha	1E-057	gi|91079082	225	202	287	57	71	86	3	1	1	1		N	FOR	Tribolium castaneum	Translocon-associated protein subunit alpha OS=Pongo abelii GN=SSR1 PE=2 SV=1	1E-044	sp|Q5R4X4|SSRA_PONAB	179	165	291	50	57	88	12	69	53	1	Pongo abelii	Contig17383_8
TI-72	72	S	196	0	TI-72	591			*	0	1	1	Unknown product	uk				CG17826	2E-005	gi|24663027	51.2	551	751	22	74	156	21	29	13	6		N	FOR	Drosophila melanogaster															Contig17812_36
TI-589	589	M	120	0	TI-589	363		ATG	*	0	7	7	conserved hypothetical protein	uc	NR-LIGHT	5e-25	94.3	similar to conserved hypothetical protein	5E-025	gi|156538160	115	150	160	45	94	82	43	1	3	1		N	FOR	Nasonia vitripennis	Chromatin complexes subunit BAP18 OS=Homo sapiens GN=BAP18 PE=1 SV=1	2E-010	sp|Q8IXM2|BAP18_HUMAN	64.3	90	172	42	53	52	36	1	3	1	Homo sapiens	Contig17238_5
TI-580	580	F	25	0	TI-580	78			*	0	5	5	Unknown product	uk
TI-579	579	K	53	0	TI-579	162			*	0	1	1	Unknown product	uk
TI-577	577	P	33	0	TI-577	102			*	0	1	1	Unknown product	uk
TI-573	573	X	138	0.724638	TI-573	417			*	1	8	7	thioredoxin reductase isoform 2	uc	NR-LIGHT	4e-55	27.2	similar to thioredoxin reductase isoform 2	4E-055	gi|91079422	214	133	492	71	27	38	0	359	5	1		N	FOR	Tribolium castaneum	Thioredoxin reductase 2, mitochondrial OS=Bos taurus GN=TXNRD2 PE=1 SV=2	2E-051	sp|Q9N2I8|TRXR2_BOVIN	200	131	511	65	26	45	0	378	5	1	Bos taurus	Contig17896_35
TI-571	571	K	70	0	TI-571	207				0	1	1	Unknown product	uk
TI-569	569	V	99	0	TI-569	300			*	0	1	1	hypothetical protein BRAFLDRAFT_115538 Branchiostoma floridae	uc	NR-LIGHT	9e-40	34.3	hypothetical protein BRAFLDRAFT_115538	9E-040	gi|260815086	164	81	239	90	34	8	0	42	12	1		N	FOR	Branchiostoma floridae	Ubiquitin-conjugating enzyme E2 J2 OS=Homo sapiens GN=UBE2J2 PE=1 SV=3	8E-039	sp|Q8N2K1|UB2J2_HUMAN	158	79	259	90	31	8	0	45	12	1	Homo sapiens	Contig18057_340
TI-561	561	S	206	0	TI-561	621			*	0	1	1	zgc:103600 - biological_process - cellular_component	uc	GO	3e-40	97.8	hypothetical protein LOC792049	5E-039	gi|158262065	162	182	187	47	98	96	2	3	4	1		N	FOR	Danio rerio	Tetratricopeptide repeat protein 36 OS=Danio rerio GN=ttc36 PE=2 SV=1	1E-039	sp|A8E7I5|TTC36_DANRE	162	182	187	47	98	96	2	3	4	1	Danio rerio	Contig4177_4
TI-555	555	I	231	0.4329	TI-555	692				0	1	1	CG10527 - farnesoic acid O-methyltransferase	met/lipd	GO	1e-12	43.8	hypothetical protein LOC100164577 isoform 2	8E-022	gi|328717080	106	158	167	38	95	100	6	9	61	1		N	FOR	Acyrthosiphon pisum															Contig17343_19
TI-553	553	F	17	0	TI-553	54			*	0	1	1	Unknown product	uk
TI-550	550	L	38	0	TI-550	117			*	0	1	1	Unknown product	uk
TI-548	548	M	315	0	TI-548	944		ATG		1	5	4	Probable arginine kinase ZC434.8 - protein binding	st	GO	0	87.2	arginine kinase	0.0	gi|116235665	646	314	356	97	88	7	0	1	1	1		N	FOR	Triatoma vitticeps	Arginine kinase OS=Schistocerca americana GN=ARGK PE=2 SV=1	1E-166	sp|P91798|KARG_SCHAM	585	314	356	86	88	43	0	1	1	1	Schistocerca americana	Contig17952_84
TI-547	547	S	162	4.32099	TI-547	484	Y			0	1	1	Probable arginine kinase ZC434.8 - protein binding	st	GO	5e-50	44.7	arginine kinase	3E-076	gi|116235665	285	158	356	86	45	22	0	61	4	1		N	FOR	Triatoma vitticeps	Arginine kinase OS=Apis mellifera GN=ARGK PE=2 SV=1	1E-069	sp|O61367|KARG_APIME	261	157	355	78	45	34	0	61	5	1	Apis mellifera	Contig17952_84
TI-541	541	F	136	0	TI-541	405				0	1	1	Unknown product	uk				neuregulin beta-2b	1.8	gi|2961139	33.5	42	480	39	9	26	3	345	66	1		N	FOR	Gallus gallus															Contig17920_108
TI-539	539	L	101	0	TI-539	306			*	0	1	1	salivary secreted peptide	s/	NR-LIGHT	6e-13	72.7	AGAP011630-PA	2E-013	gi|158301127	76.6	96	120	42	81	56	1	24	4	1		N	FOR	Anopheles gambiae str. PEST															Contig17940_72
TI-537	537	H	118	0	TI-537	357			*	0	1	1	CG41536 CG41536-PA partial Tribolium castaneum	uc	NR-LIGHT	7e-16	43	similar to CG41536 CG41536-PA, partial	7E-016	gi|189242234	84.7	52	125	77	42	12	1	71	12	1		N	FOR	Tribolium castaneum	Putative uncharacterized protein ART2 OS=Saccharomyces cerevisiae (strain ATCC	5E-007	sp|Q8TGM7|ART2_YEAST	53.1	40	61	63	67	15	0	18	12	1	Saccharomyces cerevisiae (strain ATCC 204508 / S288c)
TI-535	535	I	41	0	TI-535	126			*	0	2	2	Unknown product	uk
TI-534	534	T	45	0	TI-534	138			*	0	1	1	Unknown product	uk				hypothetical protein Bm1_17870	4E-006	gi|170579899	52.4	24	62	92	40	2	0	1	21	1		N	FOR	Brugia malayi
TI-532	532	K	124	0	TI-532	375			*	0	2	2	Unknown product	uk				kininogen 1, isoform CRA_b	0.008	gi|119598586	41.6	68	644	31	11	47	6	262	29	1		N	FOR	Homo sapiens	Sarcocystatin-A OS=Sarcophaga peregrina PE=1 SV=1	9E-005	sp|P31727|CYTA_SARPE	45.4	96	122	29	80	70	7	3	11	1	Sarcophaga peregrina	Contig18034_95
TI-525	525	V	217	0	TI-525	654			*	3	4	1	Unknown product	uk				hypothetical protein	1E-010	gi|156544907	68.9	1258	1493	25	84	145	6	229	20	3		N	FOR	Nasonia vitripennis															Contig17849_53
TI-524	524	V	211	0	TI-524	636			*	0	3	3	Unknown product	uk				hypothetical protein	1E-007	gi|156544907	58.9	589	1493	23	40	149	6	898	13	2		N	FOR	Nasonia vitripennis															Contig17849_53
TI-519	519	P	222	0	TI-519	663				0	1	1	reverse transcriptase	te	NR-LIGHT	4e-13	12.9	reverse transcriptase	4E-013	gi|40457592	77	110	857	39	13	67	0	277	86	1		N	FOR	Drosophila melanogaster
TI-518	518	N	35	0	TI-518	108			*	0	1	1	Unknown product	uk
TI-515	515	A	123	0	TI-515	372			*	0	1	1	Unknown product	uk				sister chromatid cohesion protein PDS5 homolog B-B-like	0.85	gi|193603334	34.7	68	1203	36	6	46	4	723	41	1		N	FOR	Acyrthosiphon pisum															Contig7471_2
TI-512	512	A	185	0	TI-512	554			*	0	1	1	Unknown product	uk				50 kDa midgut protein	0.006	gi|157361569	42.7	102	440	29	23	73	1	263	82	1		N	FOR	Phlebotomus papatasi															Contig17934_11
TI-51	51	F	92	0	TI-51	279			*	0	1	1	Unknown product	uk
TI-506	506	M	146	0	TI-506	441		ATG	*	0	1	1	nucleoporin 50kDa	uc	NR-LIGHT	1e-11	40	similar to nucleoporin 50kDa	1E-011	gi|91081011	70.9	126	365	37	35	91	23	1	1	1		N	FOR	Tribolium castaneum															Contig17350_13
TI-505	505	I	26	0	TI-505	81			*	0	1	1	Unknown product	uk
TI-502	502	X	89	1.12359	TI-502	270			*	0	1	1	40S ribosomal protein S7-like Acyrthosiphon pisum	ps	NR-LIGHT	2e-33	45.3	40S ribosomal protein S7-like	2E-033	gi|285002187	142	87	194	76	45	21	0	107	2	1		N	FOR	Acyrthosiphon pisum	40S ribosomal protein S7 OS=Spodoptera frugiperda GN=RpS7 PE=2 SV=1	6E-033	sp|Q962S0|RS7_SPOFR	139	87	190	76	46	21	0	103	2	1	Spodoptera frugiperda	Contig17830_55
TI-501	501	F	195	2.05128	TI-501	588			*	0	1	1	microsomal signal peptidase 25 kD subunit	pm/protease	NR-LIGHT	1e-82	98.9	putative microsomal signal peptidase 25 kD subunit	1E-082	gi|263173484	307	190	193	75	99	47	0	3	5	1		N	FOR	Cimex lectularius	Probable signal peptidase complex subunit 2 OS=Xenopus tropicalis GN=spcs2 PE=2	4E-059	sp|Q5M8Y1|SPCS2_XENTR	227	189	201	56	95	82	0	12	6	1	Xenopus tropicalis	Contig17852_10
TI-497	497	L	250	1.2	TI-497	748				0	1	1	FL(2)D protein	uc	NR-LIGHT	5e-49	42	similar to FL(2)D protein, putative	5E-049	gi|156545287	196	204	488	51	42	99	22	92	5	1		N	FOR	Nasonia vitripennis	Pre-mRNA-splicing regulator female-lethal(2)D OS=Drosophila pseudoobscura	1E-043	sp|Q28XY0|FL2D_DROPS	176	175	560	55	31	79	22	142	34	1	Drosophila pseudoobscura pseudoobscura	Contig5571_22
TI-495	495	M	208	0	TI-495	627		ATG	*	1	4	3	40S ribosomal protein S8	ps	NR-LIGHT	0	100	40S ribosomal protein S8	1E-106	gi|149689088	387	207	208	91	100	17	0	1	1	1		N	FOR	Triatoma infestans	40S ribosomal protein S8 OS=Apis mellifera GN=RpS8 PE=2 SV=2	1E-090	sp|O76756|RS8_APIME	332	207	208	76	100	48	0	1	1	1	Apis mellifera	Contig17558_45
TI-493	493	S	225	1.77778	TI-493	678			*	0	1	1	hypothetical protein AaeL_AAEL007562 Aedes aegypti	uc	NR-LIGHT	4e-68	51	hypothetical protein AaeL_AAEL007562	4E-068	gi|157116383	259	214	421	57	51	91	5	77	14	1		N	FOR	Aedes aegypti	Dual oxidase maturation factor 1 OS=Xenopus tropicalis GN=duoxa1 PE=2 SV=1	3E-027	sp|Q0P4G7|DOXA1_XENTR	121	178	308	37	58	113	6	85	30	1	Xenopus tropicalis	Contig17144_5
TI-490	490	M	94	0	TI-490	285		ATG	*	0	2	2	Defensin - extracellular space - positive regulation of biosynthetic process of antibacterial peptides active against Gram-positive bacteria -	imm	GO	6e-07	100	defensin	6E-049	gi|89112752	194	93	94	98	100	1	0	1	1	1		N	FOR	Triatoma infestans	Defensin OS=Pyrrhocoris apterus PE=1 SV=1	6E-011	sp|P37364|DEFI_PYRAP	66.2	42	43	62	100	16	0	1	52	1	Pyrrhocoris apterus	Contig17966_73
TI-488	488	T	29	0	TI-488	84				1	1	0	Unknown product	uk
TI-486	486	K	16	0	TI-486	51			*	0	1	1	Unknown product	uk
TI-485	485	F	30	0	TI-485	90				0	1	1	Unknown product	uk
TI-478	478	L	10	0	TI-478	33			*	0	1	1	Unknown product	uk
TI-473	473	D	111	0	TI-473	336			*	0	1	1	CG6873 - actin binding	cs	GO	2e-31	74.3	conserved hypothetical protein	4E-057	gi|242008321	221	110	152	95	73	5	0	42	1	1		N	FOR	Pediculus humanus corporis	Cofilin/actin-depolymerizing factor homolog OS=Drosophila melanogaster GN=tsr	2E-053	sp|P45594|CADF_DROME	207	110	148	90	75	10	0	38	1	1	Drosophila melanogaster	Contig17725_24
TI-469	469	M	195	0	TI-469	584		ATG	*	1	3	2	Unknown product	uk				AGAP009281-PA	1E-010	gi|158300081	68.2	139	193	29	73	108	14	33	39	1		N	FOR	Anopheles gambiae str. PEST	Apolipoprotein D OS=Macaca fascicularis GN=APOD PE=2 SV=1	8E-010	sp|Q8SPI0|APOD_MACFA	63.5	139	189	28	74	113	28	15	28	1	Macaca fascicularis	Contig17106_8
TI-468	468	M	100	0	TI-468	303		ATG	*	0	2	2	hypothetical protein	uc	NR-LIGHT	4e-24	82	hypothetical protein	4E-024	gi|149898849	112	81	100	68	82	26	0	1	1	1		N	FOR	Triatoma infestans															Contig16785_1
TI-466	466	F	64	0	TI-466	192				0	3	3	Unknown product	uk
TI-465	465	I	117	0	TI-465	354			*	1	2	1	Unknown product	uk				trpm, isoform F	0.097	gi|221330281	37.7	75	1942	33	4	57	11	1492	21	1		N	FOR	Drosophila melanogaster															Contig7471_2
TI-454	454	I	15	0	TI-454	48			*	0	1	1	Unknown product	uk
TI-450	450	M	169	0	TI-450	510		ATG	*	0	2	2	ribosomal protein L35Ae Tribolium castaneum	ps	NR-LIGHT	2e-47	79.7	similar to ribosomal protein L35Ae	2E-047	gi|91094995	190	113	143	81	80	21	1	30	57	1		N	FOR	Tribolium castaneum	60S ribosomal protein L35a OS=Pongo abelii GN=RPL35A PE=3 SV=1	5E-036	sp|Q5R8K6|RL35A_PONAB	150	107	110	65	98	38	2	3	60	1	Pongo abelii	Contig18035_25
TI-45	45	D	20	0	TI-45	63			*	0	1	1	Unknown product	uk
TI-447	447	K	211	0	TI-447	632				0	2	2	Triosephosphate isomerase	uc	SWISSP	3e-69	69.3	triosephosphate isomerase	1E-068	gi|45382061	261	171	248	68	69	54	0	4	40	1		N	FOR	Gallus gallus	Triosephosphate isomerase OS=Gallus gallus GN=TPI1 PE=1 SV=2	3E-069	sp|P00940|TPIS_CHICK	261	171	248	68	69	54	0	4	40	1	Gallus gallus	Contig18070_346
TI-437	437	K	93	0	TI-437	282			*	0	1	1	Unknown product	uk				obstructor-J	2.1	gi|24667196	33.5	44	353	37	13	28	1	89	39	1		N	FOR	Drosophila melanogaster															Contig17812_34
TI-435	435	Y	102	0	TI-435	303				0	2	2	Unknown product	uk				synaptic vesicle glycoprotein 2B-like isoform 1	7.7	gi|66499643	31.6	93	550	26	17	71	5	256	4	1		N	FOR	Apis mellifera
TI-433	433	X	125	4	TI-433	378			*	0	2	2	Unknown product	uk				AGAP001637-PA	4E-006	gi|333470126	52.4	65	205	39	32	41	7	28	63	1		N	FOR	Anopheles gambiae str. PEST
TI-424	424	M	105	0	TI-424	318		ATG	*	1	4	3	Unknown product	uk				unnamed protein product	0.21	gi|10177771	36.6	45	326	34	14	33	4	128	56	1		N	FOR	Arabidopsis thaliana															Contig17970_431
TI-422	422	F	241	0	TI-422	726			*	0	1	1	nonstructural protein precursor Triatoma virus	vir/	NR-LIGHT	0	13.4	nonstructural protein precursor	1E-122	gi|20451029	438	240	1795	90	13	23	0	408	1	1		N	FOR	Triatoma virus
TI-421	421	F	11	0	TI-421	36			*	0	1	1	Unknown product	uk
TI-419	419	S	40	0	TI-419	123			*	0	1	1	Unknown product	uk				hypothetical protein TcasGA2_TC013920	1.3	gi|270007359	33.9	19	229	65	9	7	0	142	1	1		N	FOR	Tribolium castaneum															Contig17830_129
TI-418	418	T	206	2.91262	TI-418	617				0	2	2	60S acidic ribosomal protein P0	ps	NR-LIGHT	0	64	60S acidic ribosomal protein P0	1E-101	gi|263173401	371	204	320	88	64	24	0	15	1	1		N	FOR	Cimex lectularius	60S acidic ribosomal protein P0 OS=Ceratitis capitata GN=RpLP0 PE=3 SV=1	1E-089	sp|Q9U3U0|RLA0_CERCA	328	202	317	79	64	42	0	16	2	1	Ceratitis capitata	Contig4545_2
TI-417	417	M	159	0	TI-417	480		ATG	*	0	2	2	TRAPP complex subunit Bet3 (predicted) - TRAPP complex - intracellular protein transport - ER to Golgi vesicle-mediated transport - molecular_function	pe	GO	1e-21	51	AGAP002385-PA	5E-058	gi|58383485	224	141	154	70	92	42	0	12	17	1		N	FOR	Anopheles gambiae str. PEST	Trafficking protein particle complex subunit 6B OS=Homo sapiens GN=TRAPPC6B PE=1	3E-042	sp|Q86SZ2|TPC6B_HUMAN	170	124	158	59	79	51	0	33	34	1	Homo sapiens
TI-41	41	M	95	0	TI-41	288		ATG	*	1	2	1	lethal (2) 06225 - lipid particle - mitochondrial proton-transporting ATP synthase complex coupling factor F(o) - proton transport -	tr	GO	9e-27	92.9	AGAP009491-PA	4E-026	gi|118780527	119	90	99	56	92	40	0	9	3	1		N	FOR	Anopheles gambiae str. PEST	ATP synthase subunit g, mitochondrial OS=Pongo abelii GN=ATP5L PE=3 SV=1	3E-023	sp|Q5RFH0|ATP5L_PONAB	107	101	103	53	99	47	11	2	3	1	Pongo abelii	Contig17955_250
TI-404	404	M	212	2.35849	TI-404	635		ATG		0	1	1	cathepsin D	pm	NR-LIGHT	0	54.3	cathepsin D	1E-114	gi|301030231	414	211	390	93	54	13	0	1	1	1		N	FOR	Triatoma infestans	Probable vacuolar protease A OS=Trichophyton verrucosum (strain HKI 0517)	2E-042	sp|D4DEN7|CARP_TRIVH	172	156	400	50	39	77	1	72	57	1	Trichophyton verrucosum (strain HKI 0517)	Contig17955_3
TI-403	403	M	81	0	TI-403	246		ATG	*	0	2	2	Unknown product	uk
TI-398	398	S	25	0	TI-398	78			*	1	1	0	Unknown product	uk
TI-391	391	S	115	0	TI-391	343				0	1	1	Unknown product	uk				hypothetical protein	3.1	gi|256081126	32.7	49	750	32	7	35	2	234	56	1		N	FOR	Schistosoma mansoni															Contig17543_20
TI-39	39	M	230	0	TI-39	693		ATG	*	0	1	1	CG1542 - molecular_function - nucleolus - rRNA processing	uc	GO	2e-32	54	CG1542	2E-031	gi|21357767	137	164	307	43	54	94	18	23	54	1		N	FOR	synthetic construct	Probable rRNA-processing protein EBP2 homolog OS=Drosophila melanogaster	6E-032	sp|Q9V9Z9|EBP2_DROME	137	164	307	43	54	94	18	23	54	1	Drosophila melanogaster	Contig17709_31
TI-386	386	R	157	0	TI-386	469			*	0	1	1	polyprotein Slow bee paralysis virus	vir/	NR-LIGHT	7e-32	4.4	polyprotein	7E-032	gi|296005647	138	128	2964	47	4	69	3	2397	26	1		N	FOR	Slow bee paralysis virus	Genome polyprotein OS=Rice tungro spherical virus (strain A) PE=1 SV=1	2E-004	sp|Q83034|POLG_RTSVA	45.1	144	3473	31	4	100	18	2830	27	1	Rice tungro spherical virus (strain A)
TI-384	384	M	208	0	TI-384	625		ATG	*	0	1	1	catalase Aedes aegypti	detox/ox	NR-LIGHT	1e-95	41.1	catalase	1E-095	gi|157135803	351	207	505	78	41	45	0	1	1	1		N	FOR	Aedes aegypti	Catalase OS=Drosophila melanogaster GN=Cat PE=1 SV=2	2E-091	sp|P17336|CATA_DROME	335	206	506	74	41	53	1	4	3	1	Drosophila melanogaster	Contig17575_33
TI-376	376	S	23	0	TI-376	72			*	0	1	1	Unknown product	uk
TI-372	372	M	50	0	TI-372	153		ATG	*	0	1	1	Unknown product	uk
TI-370	370	S	206	2.42719	TI-370	616				0	1	1	capsid protein precursor Triatoma virus	vir/	NR-LIGHT	0	22.2	capsid protein precursor	1E-103	gi|20451030	377	192	868	95	22	8	0	15	1	1		N	FOR	Triatoma virus	Structural polyprotein OS=Cricket paralysis virus (isolate Teleogryllus	5E-021	sp|P13418|POLS_CRPVC	100	131	895	38	15	82	2	60	62	1	Cricket paralysis virus (isolate Teleogryllus commodus/Australia/CrPVVIC/1968)
TI-361	361	T	103	0	TI-361	312			*	1	4	3	Unknown product	uk				AGAP000109-PA	1E-006	gi|333467316	54.3	60	90	40	68	36	0	24	41	1		N	FOR	Anopheles gambiae str. PEST	Cytochrome c oxidase subunit 7A1, mitochondrial OS=Saimiri sciureus GN=COX7A1	1E-004	sp|Q53CF6|CX7A1_SAISC	44.7	52	80	36	66	38	7	14	33	1	Saimiri sciureus	Contig3225_5
TI-354	354	V	130	0	TI-354	389				0	1	1	malectin - carbohydrate binding - endoplasmic reticulum	met/carb	GO	4e-30	33.3	conserved hypothetical protein	2E-044	gi|242013531	179	100	271	84	37	16	0	28	30	1		N	FOR	Pediculus humanus corporis	Malectin OS=Rattus norvegicus GN=Mlec PE=2 SV=1	2E-029	sp|Q5FVQ4|MLEC_RAT	127	96	291	58	33	40	0	47	34	1	Rattus norvegicus	Contig17767_9
TI-350	350	V	119	0	TI-350	360			*	0	1	1	Heat shock 70 kDa protein cognate 4	pm	SWISSP	3e-31	11.9	heat shock protein cognate 4	5E-031	gi|229892210	134	76	650	77	12	17	0	536	2	1		N	FOR	Apis mellifera	Heat shock 70 kDa protein cognate 4 OS=Manduca sexta PE=2 SV=1	3E-031	sp|Q9U639|HSP7D_MANSE	133	77	652	79	12	16	0	535	1	1	Manduca sexta	Contig17326_44
TI-349	349	G	29	0	TI-349	90			*	0	1	1	Unknown product	uk
TI-348	348	K	30	0	TI-348	93			*	0	1	1	Unknown product	uk
TI-339	339	M	208	0	TI-339	622		ATG		0	1	1	truncated histone H1	nr	NR-LIGHT	5e-45	59	truncated histone H1	5E-045	gi|149689210	182	117	197	83	60	19	0	1	1	1		N	FOR	Triatoma infestans	Histone H1 OS=Drosophila melanogaster GN=His1 PE=1 SV=1	6E-026	sp|P02255|H1_DROME	117	75	256	68	30	24	0	45	39	1	Drosophila melanogaster	Contig18070_21
TI-336	336	L	42	0	TI-336	125				0	1	1	ribosomal protein L5	ps	NR-LIGHT	1e-17	14.5	ribosomal protein L5	1E-017	gi|307095210	90.5	41	288	100	15	0	0	150	1	1		N	FOR	Triatoma matogrossensis	60S ribosomal protein L5 OS=Toxoptera citricida GN=RpL5 PE=2 SV=1	4E-015	sp|Q5XUC7|RL5_TOXCI	80.1	41	300	83	14	7	0	150	1	1	Toxoptera citricida	Contig17959_111
TI-331	331	K	48	0	TI-331	69				0	1	1	Unknown product	uk
TI-326	326	P	130	0	TI-326	393			*	0	1	1	elongation factor 1-alpha	ps	NR-LIGHT	6e-70	28.1	putative elongation factor 1-alpha	6E-070	gi|307095102	264	129	462	98	28	2	0	333	1	1		N	FOR	Triatoma matogrossensis	Elongation factor 1-alpha 1 OS=Drosophila melanogaster GN=Ef1alpha48D PE=1 SV=2	5E-062	sp|P08736|EF1A1_DROME	235	129	463	86	28	18	0	333	1	1	Drosophila melanogaster	Contig17792_130
TI-320	320	Y	238	0	TI-320	717			*	0	1	1	tubulin beta-1 chain Apis mellifera	cs	NR-LIGHT	0	53	tubulin beta-1 chain	1E-137	gi|48095525	488	236	447	96	53	8	0	208	1	1		N	FOR	Acromyrmex echinatior	Tubulin beta-1 chain OS=Manduca sexta PE=2 SV=1	1E-135	sp|O17449|TBB1_MANSE	479	226	447	99	51	2	0	208	1	1	Manduca sexta	Contig17812_30
TI-315	315	M	114	0	TI-315	340		ATG		0	1	1	tubulin alpha 3A - microtubule basal body - cilium - microtubule	cs	GO	5e-65	25.3	similar to tubulin, alpha 2 isoform 2 isoform 2	8E-064	gi|73995895	244	113	418	99	27	1	0	1	1	1		N	FOR	Canis familiaris	Tubulin alpha-3 chain OS=Bos taurus GN=TUBA3 PE=2 SV=1	2E-064	sp|Q32KN8|TBA3_BOVIN	243	113	450	99	25	1	0	1	1	1	Bos taurus	Contig17942_176
TI-310	310	C	153	0	TI-310	462			*	0	1	1	Unknown product	uk				similar to phenylalanine hydroxylase	0.54	gi|198437597	35.4	80	451	27	18	67	18	68	15	1		N	FOR	Ciona intestinalis															Contig17969_105
TI-308	308	Y	242	0	TI-308	724			*	0	1	1	Unknown product	uk				1-phosphatidylinositol-4-phosphate 5-kinase	0.13	gi|22329482	39.3	58	754	40	8	35	9	512	93	1		N	FOR	Arabidopsis thaliana
TI-304	304	F	77	0	TI-304	234			*	0	1	1	60S ribosomal protein L26	ps	NR-LIGHT	3e-26	40.2	60S ribosomal protein L26	3E-026	gi|149689146	119	59	149	95	40	3	0	6	18	1		N	FOR	Triatoma infestans	60S ribosomal protein L26 OS=Rattus norvegicus GN=Rpl26 PE=1 SV=1	5E-023	sp|P12749|RL26_RAT	106	59	145	80	41	12	0	6	18	1	Rattus norvegicus	Contig17918_17
TI-303	303	V	21	0	TI-303	66			*	0	1	1	Unknown product	uk
TI-302	302	M	67	0	TI-302	204		ATG	*	0	1	1	mitochondrial ribosomal protein L33 - mitochondrion - mitochondrial large ribosomal subunit - structural constituent of ribosome - translation	ps	GO	6e-20	100	mitochondrial ribosomal protein, L33	1E-019	gi|170044531	97.1	63	65	67	98	21	1	1	1	1		N	FOR	Culex quinquefasciatus	39S ribosomal protein L33, mitochondrial OS=Drosophila melanogaster GN=mRpL33	3E-019	sp|Q9W4L1|RM33_DROME	93.6	62	64	70	98	19	1	1	1	1	Drosophila melanogaster
TI-300	300	P	209	3.82775	TI-300	625				0	1	1	rhomboid	imm	NR-LIGHT	1e-69	14.1	hypothetical protein TcasGA2_TC006551	1E-069	gi|270012402	264	209	1455	60	14	84	1	1193	1	1		N	FOR	Tribolium castaneum	Inactive rhomboid protein 1 OS=Danio rerio GN=rhbdf1 PE=2 SV=1	1E-050	sp|Q6GMF8|RHDF1_DANRE	199	211	857	46	25	114	6	600	1	1	Danio rerio	Contig17523_36
TI-294	294	F	18	0	TI-294	54				0	1	1	Unknown product	uk
TI-293	293	R	166	0	TI-293	501			*	0	1	1	Unknown product	uk																																			Contig17357_20
TI-292	292	P	201	0	TI-292	606			*	0	1	1	vacuolar protein sorting-associated protein 28 homolog	pe	NR-LIGHT	2e-89	93.4	vacuolar protein sorting-associated protein 28 homolog	2E-089	gi|66506589	330	198	213	77	93	44	0	15	3	1		N	FOR	Apis mellifera	Vacuolar protein sorting-associated protein 28 homolog OS=Mus musculus GN=Vps28	1E-081	sp|Q9D1C8|VPS28_MOUSE	301	195	221	71	89	56	0	25	3	1	Mus musculus	Contig3111_5
TI-291	291	Q	172	2.32558	TI-291	519			*	0	1	1	ENSANGP00000001286	uc	NR-LIGHT	7e-59	21.3	similar to ENSANGP00000001286	7E-059	gi|156554871	228	168	790	69	21	51	0	430	3	1		N	FOR	Nasonia vitripennis	TBC1 domain family member CG11727 OS=Drosophila melanogaster GN=CG11727 PE=1	2E-044	sp|Q9VYY9|Y1727_DROME	177	174	807	54	22	79	6	406	3	1	Drosophila melanogaster	Contig17358_14
TI-289	289	G	43	0	TI-289	132			*	1	5	4	Unknown product	uk
TI-287	287	F	48	0	TI-287	147			*	0	2	2	Unknown product	uk
TI-283	283	C	232	0	TI-283	699			*	0	3	3	Unknown product	uk				DNA primase	0.49	gi|322376486	37	76	567	28	14	55	1	160	99	1		N	FOR	Streptococcus sp. M334
TI-276	276	A	15	0	TI-276	48			*	0	5	5	Unknown product	uk
TI-272	272	K	151	0	TI-272	456			*	0	2	2	Unknown product	uk				hypothetical protein	5.4	gi|72082777	32	47	290	30	17	34	4	205	94	1		N	FOR	Strongylocentrotus purpuratus
TI-265	265	R	206	0	TI-265	621			*	1	12	11	predicted RNA-binding protein	uc	NR-LIGHT	1e-31	44.3	predicted RNA-binding protein	1E-031	gi|149898790	138	132	300	57	44	56	0	140	1	1		N	FOR	Triatoma infestans															Contig18051_98
TI-261	261	L	17	0	TI-261	54			*	0	4	4	Unknown product	uk
TI-259	259	M	99	0	TI-259	300		ATG	*	0	1	1	RE17222p	uc	NR-LIGHT	8e-20	75.6	similar to RE17222p	8E-020	gi|156543290	97.8	86	115	48	76	45	0	1	1	1		N	FOR	Nasonia vitripennis															Contig17872_112
TI-256	256	S	236	0	TI-256	711			*	0	1	1	Serine protease inhibitor dipetalogastin (Fragment)	s/protinh	SWISSP	2e-91	62.3	infestin 1-7 precursor	1E-125	gi|83637828	449	398	409	96	98	9	0	11	9	5		N	FOR	Triatoma infestans	Serine protease inhibitor dipetalogastin (Fragment) OS=Dipetalogaster maximus	2E-091	sp|O96790|DPGN_DIPMA	335	337	351	73	96	58	0	12	2	7	Dipetalogaster maximus	Contig17791_8
TI-250	250	S	155	0	TI-250	468			*	0	1	1	40S ribosomal protein S14 Pediculus humanus corporis	ps	NR-LIGHT	3e-57	78.2	40S ribosomal protein S14, putative	3E-057	gi|242012371	222	139	179	79	78	29	0	1	5	1		N	FOR	Pediculus humanus corporis	40S ribosomal protein S14 OS=Drosophila melanogaster GN=RpS14a PE=1 SV=1	2E-055	sp|P14130|RS14_DROME	214	139	151	75	93	34	0	1	5	1	Drosophila melanogaster	Contig6820_5
TI-249	249	M	162	0	TI-249	489		ATG	*	0	1	1	PPPDE peptidase domain-containing protein 1-like isoform 1 Apis mellifera	pm/protease	NR-LIGHT	2e-53	73.7	PPPDE peptidase domain-containing protein 1-like isoform 1	2E-053	gi|328786383	209	149	206	68	73	48	4	2	1	1		N	FOR	Apis mellifera	PPPDE peptidase domain-containing protein 1 OS=Danio rerio GN=pppde1 PE=2 SV=1	3E-046	sp|Q6DC39|PPDE1_DANRE	184	121	196	64	62	43	0	1	29	1	Danio rerio	Contig17604_48
TI-248	248	L	42	0	TI-248	129			*	0	1	1	Unknown product	uk
TI-242	242	S	167	0	TI-242	499				0	2	2	inorganic phosphate cotransporter-like isoform 1	tr	NR-LIGHT	2e-33	17.9	putative inorganic phosphate cotransporter-like isoform 1	2E-033	gi|328709271	143	110	617	60	18	44	1	117	47	1		N	FOR	Acyrthosiphon pisum	Putative inorganic phosphate cotransporter OS=Drosophila melanogaster GN=Picot	2E-024	sp|Q9V7S5|PICO_DROME	111	93	529	56	18	43	6	37	59	1	Drosophila melanogaster	Contig17873_2
TI-231	231	M	143	0	TI-231	432		ATG	*	1	6	5	hypothetical protein	uc	NR-LIGHT	1e-60	91.7	hypothetical protein	1E-060	gi|149898792	233	122	134	92	92	9	0	1	1	1		N	FOR	Triatoma infestans															Contig17706_41
TI-217	217	G	180	0	TI-217	538				0	3	3	truncated histone H1	nr	NR-LIGHT	2e-39	39	truncated histone H1	2E-039	gi|149689210	163	76	197	98	39	1	0	40	29	1		N	FOR	Triatoma infestans	Histone H1 OS=Drosophila melanogaster GN=His1 PE=1 SV=1	3E-025	sp|P02255|H1_DROME	114	74	256	68	29	24	0	46	29	1	Drosophila melanogaster	Contig18070_21
TI-216	216	M	58	0	TI-216	177		ATG	*	0	2	2	hypothetical protein	uc	NR-LIGHT	4e-26	100	hypothetical protein	4E-026	gi|111379887	119	57	58	96	100	2	0	1	1	1		N	FOR	Triatoma brasiliensis															Contig17907_20
TI-209	209	G	66	0	TI-209	201			*	0	2	2	Senescence-associated protein Brugia malayi	uc	NR-LIGHT	4e-26	50.4	Senescence-associated protein	4E-026	gi|170591136	119	60	121	90	50	6	0	1	1	1		N	FOR	Brugia malayi															Contig8150_1
TI-207	207	M	83	0	TI-207	252		ATG	*	0	1	1	40S ribosomal protein S21	ps	SWISSP	7e-35	98	similar to ribosomal protein S21e	1E-034	gi|91093173	147	82	83	81	100	15	0	1	1	1		N	FOR	Tribolium castaneum	40S ribosomal protein S21 OS=Spodoptera frugiperda GN=RpS21 PE=3 SV=1	7E-035	sp|Q962Q8|RS21_SPOFR	145	81	83	80	99	16	0	1	1	1	Spodoptera frugiperda	Contig17739_5
TI-206	206	L	139	0	TI-206	420			*	0	1	1	hemoglobin alpha adult chain 2 - regulation of sensory perception of pain - protein heterooligomerization - erythrocyte development - negative	ps	GO	1e-51	92.2	unnamed protein product	5E-066	gi|12846939	251	138	142	91	98	12	0	4	1	1		N	FOR	Mus musculus	Hemoglobin subunit alpha OS=Mus musculus GN=Hba PE=1 SV=2	7E-065	sp|P01942|HBA_MOUSE	245	130	142	95	92	6	0	12	9	1	Mus musculus
TI-199	199	I	29	0	TI-199	90			*	0	1	1	Unknown product	uk
TI-194	194	M	144	0	TI-194	431		ATG		0	1	1	Hydroxysteroid dehydrogenase-like protein 2	met/lipd	SWISSP	2e-62	33.8	hypothetical protein DAPPUDRAFT_203975	2E-068	gi|321455574	259	143	418	82	34	25	0	1	1	1		N	FOR	Daphnia pulex	Hydroxysteroid dehydrogenase-like protein 2 OS=Xenopus tropicalis GN=hsdl2 PE=2	2E-062	sp|Q66KC4|HSDL2_XENTR	236	140	417	80	34	27	0	4	3	1	Xenopus tropicalis	Contig18032_73
TI-187	187	M	174	0	TI-187	525		ATG	*	0	2	2	myosin regulatory light chain 2 smooth muscle Aedes aegypti	cs	NR-LIGHT	1e-80	83.6	myosin regulatory light chain 2 smooth muscle	1E-080	gi|157120145	300	173	208	82	84	30	0	1	1	1		N	FOR	Aedes aegypti	Myosin regulatory light chain sqh OS=Drosophila melanogaster GN=sqh PE=1 SV=1	2E-078	sp|P40423|SQH_DROME	291	173	174	80	100	34	0	1	1	1	Drosophila melanogaster	Contig17965_34
TI-186	186	F	19	0	TI-186	60			*	0	1	1	Unknown product	uk
TI-185	185	K	49	2.04082	TI-185	146				0	1	1	Unknown product	uk
TI-18	18	A	40	0	TI-18	123			*	0	1	1	Unknown product	uk
TI-175	175	M	233	0	TI-175	702		ATG	*	0	2	2	Unknown product	uk				conserved hypothetical protein	2E-005	gi|170057069	51.2	118	243	30	49	83	8	29	20	1		N	FOR	Culex quinquefasciatus															Contig17963_37
TI-173	173	L	138	0	TI-173	417			*	0	1	1	Oligomycin sensitivity-conferring protein - lipid particle - mitochondrial proton-transporting ATP synthase central stalk - proton transport -	tr	GO	2e-34	57.8	oligomycin sensitivity conferring protein precursor	4E-033	gi|1490236	142	120	209	55	58	54	0	15	18	1		N	FOR	Drosophila melanogaster	ATP synthase subunit O, mitochondrial OS=Drosophila melanogaster GN=Oscp PE=2	8E-034	sp|Q24439|ATPO_DROME	142	120	209	55	58	54	0	15	18	1	Drosophila melanogaster	Contig17635_30
TI-172	172	M	68	0	TI-172	207		ATG	*	0	1	1	intracellular protein transport - ovulation from ovarian follicle - oocyte growth - molting cycle collagen and cuticulin-based cuticle -	extmat	GO	1e-20	100	similar to Sec61p gamma subunit	8E-021	gi|156536879	101	67	68	73	100	18	0	1	1	1		N	FOR	Nasonia vitripennis	Protein transport protein Sec61 subunit gamma OS=Gryllotalpa orientalis	8E-022	sp|Q7Z1B8|S61G1_GRYOR	102	67	68	73	100	18	0	1	1	1	Gryllotalpa orientalis	Contig17891_121
TI-17	17	K	71	0	TI-17	216			*	0	1	1	Unknown product	uk				DnaJ homolog, subfamily C, member 19	0.72	gi|297466452	35	60	116	30	53	46	6	34	3	1		N	FOR	Bos taurus
TI-16	16	D	179	0	TI-16	534				0	1	1	NBP2b protein	uc	NR-LIGHT	3e-28	82.1	similar to NBP2b protein, putative	3E-028	gi|189237012	126	164	207	43	80	96	8	10	2	1		N	FOR	Tribolium castaneum	Coiled-coil domain-containing protein 43 OS=Rattus norvegicus GN=Ccdc43 PE=2	8E-010	sp|Q5BK07|CCD43_RAT	63.2	145	222	31	66	105	13	22	2	1	Rattus norvegicus	Contig15608_3
TI-152	152	S	200	0	TI-152	603			*	0	9	9	hypothetical protein LOC100579034 partial	uc	NR-LIGHT	8e-24	22.7	hypothetical protein LOC100579034, partial	8E-024	gi|328790765	112	153	699	34	22	104	5	481	36	1		N	FOR	Apis mellifera	NMDA receptor-regulated protein 2 OS=Homo sapiens GN=NARG2 PE=1 SV=2	2E-005	sp|Q659A1|NARG2_HUMAN	49.3	99	982	27	10	75	3	773	78	1	Homo sapiens	Contig17567_10
TI-151	151	M	129	0	TI-151	390		ATG	*	1	5	4	salivary secreted protein	s/	NR-LIGHT	4e-41	100	salivary secreted protein	4E-041	gi|149689094	168	128	129	65	100	44	1	1	1	1		N	FOR	Triatoma infestans															Contig17819_86
TI-144	144	K	41	0	TI-144	126			*	2	3	1	Unknown product	uk
TI-140	140	K	13	0	TI-140	42			*	0	1	1	Unknown product	uk
TI-132	132	G	48	0	TI-132	147			*	0	1	1	Unknown product	uk
TI-126	126	F	265	0	TI-126	794				2	4	2	NADH dehydrogenase I H subunit - NADH dehydrogenase (ubiquinone) - mitochondrial electron transport NADH to ubiquinone	met/energy	GO	2e-47	69.7	NADH dehydrogenase subunit I	1E-126	gi|291621807	454	260	303	89	86	28	0	1	2	1		N	FOR	Triatoma infestans	NADH-ubiquinone oxidoreductase chain 1 OS=Anopheles quadrimaculatus GN=ND1 PE=3	5E-089	sp|P33502|NU1M_ANOQU	327	260	314	61	83	101	0	8	2	1	Anopheles quadrimaculatus	Contig22712_1
TI-125	125	S	222	3.15315	TI-125	669			*	0	1	1	hydroxyprostaglandin dehydrogenase 15 (NAD) - NAD or NADH binding - negative regulation of cell cycle - 15-hydroxyprostaglandin dehydrogenase (NAD+)	st	GO	9e-25	69.1	15-hydroxyprostaglandin dehydrogenase	1E-032	gi|328779312	141	178	272	39	66	110	4	45	23	1		N	FOR	Apis mellifera	15-hydroxyprostaglandin dehydrogenase	3E-030	sp|Q8VCC1|PGDH_MOUSE	131	168	269	36	63	108	2	28	23	1	Mus musculus	Contig17866_7
TI-12	12	P	185	0	TI-12	552				0	1	1	cathepsin D	pm	NR-LIGHT	7e-81	47.1	cathepsin D	7E-081	gi|301030231	301	183	390	75	47	45	0	32	1	1		N	FOR	Triatoma infestans	Probable vacuolar protease A OS=Trichophyton verrucosum (strain HKI 0517)	2E-043	sp|D4DEN7|CARP_TRIVH	174	174	400	46	44	96	7	54	2	1	Trichophyton verrucosum (strain HKI 0517)	Contig17955_3
TI-112	112	M	138	0	TI-112	417		ATG	*	0	1	1	NADH dehydrogenase subunit 5 Triatoma dimidiata	uc	NR-LIGHT	2e-52	24.2	NADH dehydrogenase subunit 5	2E-052	gi|11182469	206	137	570	73	24	37	0	329	1	1		N	FOR	Triatoma dimidiata	NADH-ubiquinone oxidoreductase chain 5 OS=Drosophila melanogaster GN=mt:ND5 PE=2	4E-027	sp|P18932|NU5M_DROME	119	138	572	42	24	80	1	326	1	1	Drosophila melanogaster	Contig7823_1
TI-91	91	G	133	1.50376	TI-91	396				1	0	1	hypothetical protein TcasGA2_TC012551	uc	NR-LIGHT	7e-24	3	hypothetical protein TcasGA2_TC012551	7E-024	gi|270013885	111	116	3944	48	3	61	2	3282	3	1		N	FOR	Tribolium castaneum	Hemocytin OS=Bombyx mori PE=2 SV=1	1E-011	sp|P98092|HMCT_BOMMO	68.6	113	3133	36	4	74	4	2284	5	1	Bombyx mori	Contig17685_3
TI-90	90	L	226	0	TI-90	676				2	0	2	Probable G-protein coupled receptor 158	st	SWISSP	2e-11	13.1	CG31195	1E-098	gi|281362159	361	526	807	74	65	59	1	267	1	2		N	FOR	Drosophila melanogaster	Probable G-protein coupled receptor 158 OS=Mus musculus GN=Gpr158 PE=1 SV=2	2E-011	sp|Q8C419|GP158_MOUSE	68.9	140	1200	27	12	114	22	221	25	1	Mus musculus	Contig17898_11
TI-86	86	M	163	4.90798	TI-86	492	Y	ATG	*	1	0	1	Unknown product	uk				jupiter, isoform C	3E-004	gi|24645999	46.6	40	197	51	21	21	2	18	24	1		N	FOR	synthetic construct	Microtubule-associated protein Jupiter OS=Drosophila melanogaster GN=Jupiter	8E-005	sp|Q9I7K0|JUPIT_DROME	46.2	37	208	55	18	18	2	21	27	1	Drosophila melanogaster	Contig17848_93
TI-85	85	L	49	0	TI-85	150			*	1	0	1	vesicle associated protein	pe	NR-LIGHT	3e-07	4.1	hypothetical protein TcasGA2_TC005990	3E-007	gi|270011899	56.2	47	230	56	21	21	0	180	1	1		N	FOR	Tribolium castaneum															Contig17909_35
TI-83	83	F	31	0	TI-83	96			*	1	0	1	Unknown product	uk
TI-80	80	S	92	0	TI-80	278			*	1	0	1	Unknown product	uk				hypothetical protein	5.2	gi|256079598	32	34	741	45	5	19	0	489	54	1		N	FOR	Schistosoma mansoni
TI-76	76	G	198	0	TI-76	595			*	1	0	1	inositol-trisphosphate 3-kinase A-like	uc	NR-LIGHT	1e-86	47.4	inositol-trisphosphate 3-kinase A-like	1E-086	gi|328708818	320	197	417	73	47	53	0	157	1	1		N	FOR	Acyrthosiphon pisum	Inositol-trisphosphate 3-kinase C OS=Mus musculus GN=Itpkc PE=2 SV=1	8E-038	sp|Q7TS72|IP3KC_MOUSE	156	199	678	42	29	116	6	432	3	1	Mus musculus	Contig15999_2
TI-75	75	M	117	0	TI-75	354		ATG	*	1	0	1	vesicle-associated membrane protein 3 (cellubrevin) - molecular_function	pe	GO	2e-20	65.6	hypothetical protein DAPPUDRAFT_218600	3E-021	gi|321456621	102	66	132	71	51	19	0	29	15	1		N	FOR	Daphnia pulex	Synaptobrevin-1 OS=Caenorhabditis briggsae GN=snb-1 PE=3 SV=1	4E-019	sp|Q60WU2|SYB1_CAEBR	93.2	64	108	67	60	21	0	21	17	1	Caenorhabditis briggsae	Contig17909_61
TI-71	71	M	129	0	TI-71	390		ATG	*	1	0	1	cytochrome P450 Cyp6b29 Bombyx mori	detox/ox	NR-LIGHT	1e-18	20	cytochrome P450 Cyp6b29	1E-018	gi|163838686	94	99	505	44	20	56	1	25	29	1		N	FOR	Bombyx mori	Cytochrome P450 6B1 OS=Papilio polyxenes GN=CYP6B1 PE=1 SV=1	2E-014	sp|Q04552|CP6B1_PAPPO	77.8	80	498	43	16	46	0	22	28	1	Papilio polyxenes	Contig17683_7
TI-67	67	M	150	0	TI-67	449		ATG		1	0	1	Unknown product	uk																																			Contig17151_4
TI-65	65	G	134	0	TI-65	401				1	0	1	selenide water dikinase selenocysteine-containing - tRNA aminoacylation for protein translation - selenide water dikinase	ps	GO	4e-09	36.5	selenophosphate synthase	2E-033	gi|157115185	143	134	277	49	49	68	1	65	1	1		N	FOR	Aedes aegypti	Selenide, water dikinase 1 OS=Mus musculus GN=Sephs1 PE=2 SV=1	7E-034	sp|Q8BH69|SPS1_MOUSE	142	133	392	48	34	69	0	162	1	1	Mus musculus	Contig16819_4
TI-64	64	P	223	0	TI-64	667				2	0	2	heterogeneous nuclear ribonucleoprotein 87F-like	uc	NR-LIGHT	7e-62	51	heterogeneous nuclear ribonucleoprotein 87F-like	7E-062	gi|328709829	238	172	349	65	50	62	9	5	39	1		N	FOR	Acyrthosiphon pisum	Heterogeneous nuclear ribonucleoprotein A1 OS=Drosophila melanogaster GN=Hrb98DE	3E-059	sp|P07909|ROA1_DROME	228	178	365	60	49	72	2	22	35	2	Drosophila melanogaster	Contig17966_159
TI-63	63	Y	181	0	TI-63	540				1	0	1	cathepsin D (lysosomal aspartyl protease)	pm	NR-LIGHT	2e-37	82.2	cathepsin D (lysosomal aspartyl protease)	2E-037	gi|226476910	157	170	220	41	78	105	11	17	2	1		N	FOR	Schistosoma japonicum	Cathepsin D OS=Gallus gallus GN=CTSD PE=1 SV=1	1E-035	sp|Q05744|CATD_CHICK	149	125	398	50	32	62	0	70	52	1	Gallus gallus	Contig16285_5
TI-6	6	F	77	0	TI-6	234			*	1	0	1	Unknown product	uk
TI-588	588	F	30	0	TI-588	93			*	1	0	1	Unknown product	uk
TI-587	587	I	53	0	TI-587	162			*	2	0	2	Unknown product	uk				mannose-1-phosphate guanyltransferase alpha-B	3.5	gi|41053852	32.7	61	422	33	15	41	16	196	3	1		N	FOR	Danio rerio
TI-586	586	V	58	1.72414	TI-586	177			*	1	0	1	secreted salivary peptide precursor	s/	NR-LIGHT	5e-10	39.5	putative secreted salivary peptide precursor	5E-010	gi|149689160	65.5	33	86	100	40	0	0	53	25	1		N	FOR	Triatoma infestans															Contig17891_118
TI-585	585	S	150	0	TI-585	453			*	1	0	1	Unknown product	uk
TI-583	583	L	44	0	TI-583	135			*	2	0	2	positive regulation of growth rate - hermaphrodite genitalia development - molting cycle collagen and cuticulin-based cuticle - nematode larval	extmat	GO	4e-11	10.5	eukaryotic initiation factor 4A-II, putative	5E-012	gi|242007840	72	41	449	78	9	9	0	408	2	1		N	FOR	Pediculus humanus corporis	ATP-dependent RNA helicase fal1 OS=Schizosaccharomyces pombe (strain ATCC 38366	5E-012	sp|Q10055|FAL1_SCHPO	69.7	41	394	69	11	13	0	353	2	1	Schizosaccharomyces pombe (strain ATCC 38366 / 972)	Contig17157_4
TI-582	582	M	86	0	TI-582	261		ATG	*	1	0	1	defensin	imm	NR-LIGHT	7e-13	79.7	defensin A	3E-013	gi|149689102	76.3	73	93	52	80	35	8	18	19	1		N	FOR	Triatoma infestans															Contig17966_82
TI-581	581	M	87	0	TI-581	264		ATG	*	1	0	1	defensin A	imm	NR-LIGHT	5e-12	82	defensin B	1E-012	gi|29335960	74.3	75	94	48	81	39	8	18	19	1		N	FOR	Rhodnius prolixus															Contig17966_82
TI-578	578	L	124	0	TI-578	371				1	0	1	mitochondrial ATPase subunit 6 - regulation of ATPase - neurological system process - muscle maintenance - determination of adult life span -	tr	GO	2e-27	46.8	truncated ATPase subunit 6	1E-035	gi|149898887	150	112	222	69	51	34	0	110	1	1		N	FOR	Triatoma infestans	ATP synthase subunit a OS=Drosophila melanogaster GN=mt:ATPase6 PE=3 SV=2	1E-026	sp|P00850|ATP6_DROME	118	104	224	58	47	44	0	119	9	1	Drosophila melanogaster
TI-576	576	V	114	0	TI-576	341				1	0	1	mitochondrial ATPase subunit 6 - regulation of ATPase - neurological system process - muscle maintenance - determination of adult life span -	tr	GO	8e-28	46.8	truncated ATPase subunit 6	2E-035	gi|149898887	149	104	222	72	47	29	0	118	1	1		N	FOR	Triatoma infestans	ATP synthase subunit a OS=Drosophila melanogaster GN=mt:ATPase6 PE=3 SV=2	3E-027	sp|P00850|ATP6_DROME	120	104	224	57	47	45	0	119	1	1	Drosophila melanogaster
TI-575	575	V	93	0	TI-575	276				4	2	2	mitochondrial ATPase subunit 6 - regulation of ATPase - neurological system process - muscle maintenance - determination of adult life span -	tr	GO	1e-21	41.5	truncated ATPase subunit 6	3E-034	gi|149898887	145	92	222	76	42	22	0	118	1	1		N	FOR	Triatoma infestans	ATP synthase subunit a OS=Aedes aegypti GN=mt:ATPase6 PE=2 SV=1	2E-021	sp|Q1HRS5|ATP6_AEDAE	100	91	226	53	41	43	1	122	3	1	Aedes aegypti
TI-568	568	V	199	0	TI-568	595				1	0	1	ubiquitin conjugating enzyme E2 J2 Tribolium castaneum	uc	NR-LIGHT	4e-57	83.5	similar to ubiquitin conjugating enzyme E2, J2	4E-057	gi|91082969	223	169	225	58	76	78	18	41	12	1		N	FOR	Tribolium castaneum	Ubiquitin-conjugating enzyme E2 J2 OS=Homo sapiens GN=UBE2J2 PE=1 SV=3	3E-055	sp|Q8N2K1|UB2J2_HUMAN	214	201	259	56	78	88	14	45	12	1	Homo sapiens	Contig18057_340
TI-565	565	M	177	0	TI-565	530		ATG		4	0	4	rhodnius biogenic aminebinding-like protein	uc	NR-LIGHT	8e-48	84.8	rhodnius biogenic aminebinding-like protein	8E-048	gi|307094890	191	177	211	53	84	84	3	1	1	1		N	FOR	Triatoma matogrossensis	Apolipoprotein D OS=Macaca fascicularis GN=APOD PE=2 SV=1	0.002	sp|Q8SPI0|APOD_MACFA	42	112	189	26	60	99	24	27	24	1	Macaca fascicularis	Contig1709_3
TI-564	564	K	210	0	TI-564	633			*	4	0	4	nitrophorin 1A precursor	s/	NR-LIGHT	6e-09	82.8	rhodnius biogenic aminebinding-like protein	4E-061	gi|307094890	236	197	211	55	94	89	1	9	14	1		N	FOR	Triatoma matogrossensis	Apolipoprotein D OS=Macaca fascicularis GN=APOD PE=2 SV=1	2E-004	sp|Q8SPI0|APOD_MACFA	46.2	160	189	24	85	137	25	27	30	1	Macaca fascicularis	Contig1709_3
TI-563	563	S	46	0	TI-563	135				1	0	1	Unknown product	uk				zinc finger protein GLI1	1.1	gi|170035164	34.3	39	670	37	6	25	0	176	1	1		N	FOR	Culex quinquefasciatus
TI-562	562	H	223	0	TI-562	672			*	1	0	1	Unknown product	uk				putative protein	0.60	gi|10129645	36.6	90	218	29	42	68	13	53	97	1		N	FOR	Arabidopsis thaliana															Contig17710_43
TI-558	558	R	37	0	TI-558	114			*	1	0	1	Unknown product	uk
TI-556	556	M	242	0	TI-556	724		ATG		3	2	1	triabin-like lipocalin precursor	s/	NR-LIGHT	2e-13	88.5	triabin-like lipocalin precursor	2E-013	gi|307094892	78.6	179	210	31	86	128	18	1	1	1		N	FOR	Triatoma matogrossensis	Triabin OS=Triatoma pallidipennis PE=1 SV=1	0.003	sp|Q27049|TRIA_TRIPA	42.4	148	160	28	93	124	37	1	1	1	Triatoma pallidipennis	Contig1709_2
TI-545	545	L	35	0	TI-545	108			*	1	1	0	Unknown product	uk
TI-543	543	I	80	0	TI-543	243			*	6	1	5	NADH dehydrogenase subunit 2 Triatoma dimidiata	uc	NR-LIGHT	1e-20	24	NADH dehydrogenase subunit 2	1E-020	gi|11182463	100	79	332	62	24	30	0	31	1	1		N	FOR	Triatoma dimidiata	NADH-ubiquinone oxidoreductase chain 2 OS=Hylobates lar GN=MT-ND2 PE=3 SV=1	4E-006	sp|Q95704|NU2M_HYLLA	50.1	82	347	31	24	57	3	31	1	1	Hylobates lar
TI-540	540	R	13	0	TI-540	42			*	1	0	1	Unknown product	uk
TI-538	538	P	57	0	TI-538	174			*	17	7	10	Unknown product	uk
TI-536	536	K	137	0	TI-536	414			*	3	1	2	CG41536 CG41536-PA	uc	NR-LIGHT	1e-28	50.3	similar to CG41536 CG41536-PA	1E-028	gi|189242281	127	78	159	77	50	18	1	79	5	1		N	FOR	Tribolium castaneum	Putative uncharacterized protein ART2 OS=Saccharomyces cerevisiae (strain ATCC	7E-010	sp|Q8TGM7|ART2_YEAST	62.4	52	61	58	87	22	0	6	19	1	Saccharomyces cerevisiae (strain ATCC 204508 / S288c)
TI-533	533	Y	36	0	TI-533	111			*	1	0	1	Unknown product	uk
TI-531	531	A	255	0	TI-531	768			*	3	3	0	Unknown product	uk				hypothetical protein DAPPUDRAFT_308200	2E-005	gi|321461569	51.6	114	450	26	26	84	7	37	36	1		N	FOR	Daphnia pulex															Contig17963_39
TI-530	530	M	240	0	TI-530	723		ATG	*	4	1	3	Unknown product	uk				similar to CG14661 CG14661-PA	0.003	gi|91082781	44.7	209	249	21	84	168	13	37	35	1		N	FOR	Tribolium castaneum															Contig17963_39
TI-53	53	S	100	0	TI-53	303			*	1	0	1	CG7920 - lipid particle - 4-hydroxybutyrate CoA-transferase	uc	GO	1e-29	17.6	CG7920	3E-028	gi|21358615	125	83	477	67	18	27	0	114	4	1		N	FOR	synthetic construct	4-hydroxybutyrate coenzyme A transferase OS=Clostridium kluyveri (strain ATCC	2E-013	sp|P38942|CAT2_CLOK5	74.7	85	429	40	20	51	0	72	1	1	Clostridium kluyveri (strain ATCC 8527 / DSM 555 / NCIMB 10680)	Contig17215_4
TI-528	528	N	45	0	TI-528	138			*	1	0	1	Unknown product	uk
TI-526	526	D	196	0	TI-526	591			*	15	12	3	capsid protein precursor Triatoma virus	vir/	NR-LIGHT	0	22.5	capsid protein precursor	1E-109	gi|20451030	397	195	868	99	23	1	0	673	1	1		N	FOR	Triatoma virus	Undecaprenyl-diphosphatase OS=Synechococcus sp. (strain CC9311) GN=uppP PE=3	0.006	sp|Q0I740|UPPP_SYNS3	40.8	91	283	31	33	63	2	142	94	1	Synechococcus sp. (strain CC9311)
TI-522	522	F	53	0	TI-522	162			*	1	0	1	Unknown product	uk
TI-521	521	E	165	0	TI-521	492				9	8	1	nonstructural protein precursor Triatoma virus	vir/	NR-LIGHT	2e-68	8.5	nonstructural protein precursor	2E-068	gi|20451029	259	153	1795	77	9	34	0	1	1	1		N	FOR	Triatoma virus
TI-520	520	K	32	0	TI-520	99			*	1	0	1	Unknown product	uk
TI-52	52	I	35	0	TI-52	108			*	1	0	1	Unknown product	uk
TI-510	510	F	59	0	TI-510	180			*	1	0	1	Unknown product	uk
TI-509	509	M	13	0	TI-509	42		ATG	*	1	0	1	Unknown product	uk
TI-508	508	M	105	4.7619	TI-508	318		ATG	*	1	0	1	thioredoxin	uc	NR-LIGHT	3e-44	100	thioredoxin	3E-044	gi|307095132	179	104	105	86	100	14	0	1	1	1		N	FOR	Triatoma matogrossensis	Thioredoxin-2 OS=Drosophila yakuba GN=Trx-2 PE=3 SV=1	7E-023	sp|Q6XHI1|THIO2_DROYA	105	101	106	50	96	50	1	1	1	1	Drosophila yakuba	Contig17970_682
TI-500	500	N	18	0	TI-500	57			*	1	0	1	Unknown product	uk
TI-50	50	L	226	0	TI-50	676				1	0	1	Unknown product	uk				hypothetical protein	5E-010	gi|156544907	66.6	1006	1493	23	67	139	2	473	22	3		N	FOR	Nasonia vitripennis															Contig17849_53
TI-5	5	N	236	0	TI-5	706				3	0	3	Choline transporter-like protein 4	tr	SWISSP	2e-29	30.1	hypothetical protein TcasGA2_TC001323	5E-048	gi|270002312	193	200	753	45	27	112	5	386	31	1		N	FOR	Tribolium castaneum	CTL-like protein 2 OS=Anopheles gambiae GN=AGAP010343 PE=3 SV=4	4E-043	sp|Q7PRJ0|CTLH2_ANOGA	174	207	790	43	26	120	8	421	31	1	Anopheles gambiae	Contig17825_23
TI-498	498	T	22	0	TI-498	69			*	1	0	1	Unknown product	uk
TI-496	496	R	62	0	TI-496	189			*	1	0	1	Unknown product	uk
TI-494	494	M	143	0	TI-494	432		ATG	*	4	1	3	40S ribosomal protein S23	ps	SWISSP	3e-75	100	40S ribosomal protein S23, putative	4E-075	gi|242025351	281	142	143	96	100	5	0	1	1	1		N	FOR	Pediculus humanus corporis	40S ribosomal protein S23 OS=Spodoptera frugiperda GN=RpS23 PE=2 SV=1	3E-075	sp|Q962Q7|RS23_SPOFR	279	142	143	95	100	6	0	1	1	1	Spodoptera frugiperda	Contig17967_29
TI-491	491	K	211	2.36967	TI-491	632				1	0	1	Unknown product	uk
TI-482	482	E	138	0	TI-482	417			*	1	0	1	cathepsin D	pm	NR-LIGHT	7e-42	35.3	cathepsin D	7E-042	gi|301030231	171	136	390	57	35	59	1	253	1	1		N	FOR	Triatoma infestans	Cathepsin D OS=Homo sapiens GN=CTSD PE=1 SV=1	1E-023	sp|P07339|CATD_HUMAN	107	131	412	39	32	80	2	276	6	1	Homo sapiens	Contig17955_3
TI-48	48	P	188	0	TI-48	567			*	1	0	1	AGAP004450-PA Tribolium castaneum	uc	NR-LIGHT	8e-18	38.5	similar to AGAP004450-PA	8E-018	gi|91081053	92	121	322	40	38	74	2	144	49	1		N	FOR	Tribolium castaneum	Estradiol 17-beta-dehydrogenase 2 OS=Rattus norvegicus GN=Hsd17b2 PE=2 SV=1	0.003	sp|Q62730|DHB2_RAT	41.6	103	381	31	27	75	11	161	49	1	Rattus norvegicus	Contig17851_114
TI-476	476	S	23	0	TI-476	72			*	1	0	1	Unknown product	uk
TI-475	475	K	15	0	TI-475	48			*	1	0	1	Unknown product	uk
TI-474	474	F	206	0	TI-474	621			*	4	0	4	crystallin alpha B - contractile fiber - camera-type eye development - muscle organ development - structural constituent of eye lens - Z disc -	cs	GO	2e-30	96	protein lethal, putative	2E-051	gi|242005722	204	174	211	56	83	78	4	23	21	1		N	FOR	Pediculus humanus corporis	Protein lethal(2)essential for life OS=Drosophila melanogaster GN=l(2)efl PE=1	9E-038	sp|P82147|L2EFL_DROME	156	184	187	43	99	105	6	1	21	1	Drosophila melanogaster	Contig3102_2
TI-47	47	M	133	0	TI-47	402		ATG	*	1	0	1	heme-binding protein	uc	NR-LIGHT	6e-37	97	heme-binding protein	6E-037	gi|149689110	154	139	143	55	98	63	7	1	1	1		N	FOR	Triatoma infestans															Contig18036_44
TI-467	467	M	143	0	TI-467	428		ATG		1	0	1	box H/ACA snoRNP Ixodes scapularis	uc	NR-LIGHT	5e-25	76.4	box H/ACA snoRNP, putative	5E-025	gi|241855547	115	139	187	44	75	79	3	1	1	1		N	FOR	Ixodes scapularis	H/ACA ribonucleoprotein complex subunit 2-like protein OS=Drosophila	1E-017	sp|Q9V3U2|NHP2_DROME	88.6	93	160	46	59	50	3	19	52	1	Drosophila melanogaster	Contig18001_14
TI-463	463	R	21	0	TI-463	60				1	0	1	Unknown product	uk
TI-462	462	R	59	0	TI-462	180			*	1	0	1	Unknown product	uk				conserved hypothetical protein	0.58	gi|221485776	35.4	50	445	31	11	35	1	368	1	1		N	FOR	Toxoplasma gondii GT1
TI-461	461	K	75	0	TI-461	228			*	1	0	1	COMM domain containing 7 - NF-kappaB binding - tumor necrosis factor-mediated signaling pathway - negative regulation of NF-kappaB transcription	imm	GO	3e-13	34	hypothetical protein BRAFLDRAFT_108193	4E-015	gi|260822352	82.4	69	202	50	35	35	0	131	5	1		N	FOR	Branchiostoma floridae	COMM domain-containing protein 7 OS=Mus musculus GN=Commd7 PE=2 SV=1	1E-012	sp|Q8BG94|COMD7_MOUSE	72	68	200	44	35	38	0	129	5	1	Mus musculus
TI-458	458	M	376	0	TI-458	1131		ATG	*	7	3	4	Actin-5C	cs	NR-LIGHT	0	100	actin 5C, isoform B	0.0	gi|17530805	784	375	376	99	100	1	0	1	1	1		N	FOR	Anopheles gambiae str. PEST	Actin-5C OS=Anopheles gambiae GN=Act5C PE=2 SV=1	0.0	sp|P84185|ACT5C_ANOGA	784	375	376	99	100	1	0	1	1	1	Anopheles gambiae	Contig16250_1
TI-456	456	F	10	0	TI-456	33			*	1	0	1	Unknown product	uk
TI-451	451	K	57	1.75439	TI-451	174			*	1	0	1	Unknown product	uk
TI-449	449	G	149	0	TI-449	450			*	2	0	2	aldo-keto reductase family 1 member B1 (aldose reductase) - positive regulation of smooth muscle cell proliferation - positive regulation of	cs	GO	3e-32	47.7	aldo-keto reductase family 1 member B10-like	2E-039	gi|193601268	162	142	320	55	45	64	1	164	1	1		N	FOR	Acyrthosiphon pisum	Aldose reductase OS=Bos taurus GN=AKR1B1 PE=1 SV=1	7E-033	sp|P16116|ALDR_BOVIN	139	149	315	47	48	79	3	157	1	1	Bos taurus	Contig5015_1
TI-445	445	E	120	0	TI-445	363			*	2	1	1	nonstructural protein precursor Triatoma virus	vir/	NR-LIGHT	7e-64	6.6	nonstructural protein precursor	7E-064	gi|20451029	244	119	1795	97	7	3	0	1676	1	1		N	FOR	Triatoma virus	Replicase polyprotein OS=Drosophila C virus (strain EB) GN=ORF1 PE=4 SV=1	2E-008	sp|O36966|POLN_DCVEB	57.8	78	1759	37	4	49	0	1648	4	1	Drosophila C virus (strain EB)
TI-443	443	E	32	0	TI-443	99			*	1	0	1	Unknown product	uk
TI-442	442	K	167	0	TI-442	504			*	1	0	1	Unknown product	uk
TI-441	441	G	212	0	TI-441	639			*	1	0	1	proteasome subunit alpha type Pediculus humanus corporis	prot	NR-LIGHT	2e-55	58.3	proteasome subunit alpha type, putative	2E-055	gi|242003283	217	169	293	59	58	69	1	84	1	1		N	FOR	Pediculus humanus corporis	Proteasome subunit alpha type-1 OS=Dictyostelium discoideum GN=psmA1 PE=3 SV=1	2E-045	sp|Q27562|PSA1_DICDI	182	170	248	53	69	80	2	71	1	1	Dictyostelium discoideum	Contig4158_3
TI-439	439	G	206	0	TI-439	621			*	2	1	1	nonstructural protein precursor Triatoma virus	vir/	NR-LIGHT	2e-77	8.9	nonstructural protein precursor	2E-077	gi|20451029	290	160	1795	89	9	17	0	841	2	1		N	FOR	Triatoma virus
TI-434	434	T	107	0	TI-434	324			*	2	0	2	Defensin - extracellular space - positive regulation of biosynthetic process of antibacterial peptides active against Gram-positive bacteria -	imm	GO	2e-05	65.2	defensin 4	1E-045	gi|197281888	183	91	93	92	99	7	0	2	16	1		N	FOR	Triatoma brasiliensis	Defensin OS=Pyrrhocoris apterus PE=1 SV=1	1E-013	sp|P37364|DEFI_PYRAP	75.1	42	43	69	100	13	0	1	65	1	Pyrrhocoris apterus	Contig17966_73
TI-432	432	L	70	0	TI-432	213			*	2	1	1	cytochrome B	met/energy	NR-LIGHT	2e-20	23.2	cytochrome B	2E-020	gi|317408312	100	51	224	92	23	4	0	83	19	1		N	FOR	Triatoma infestans	Cytochrome b OS=Corvus brachyrhynchos GN=MT-CYB PE=3 SV=1	3E-013	sp|Q950C7|CYB_CORBR	73.6	51	380	65	14	18	0	194	19	1	Corvus brachyrhynchos
TI-430	430	R	395	1.01266	TI-430	1184				4	1	3	capsid protein precursor Triatoma virus	vir/	NR-LIGHT	0	43.6	capsid protein precursor	0.0	gi|20451030	732	378	868	95	44	17	0	381	6	1		N	FOR	Triatoma virus	Structural polyprotein OS=Cricket paralysis virus (isolate Teleogryllus	8E-021	sp|P13418|POLS_CRPVC	101	341	895	26	38	269	46	409	6	1	Cricket paralysis virus (isolate Teleogryllus commodus/Australia/CrPVVIC/1968)
TI-428	428	V	47	0	TI-428	144			*	1	0	1	Unknown product	uk				hypothetical protein	0.29	gi|256065190	36.2	22	115	69	20	7	0	3	25	1		N	FOR	Schistosoma mansoni
TI-427	427	S	24	0	TI-427	75			*	2	0	2	Unknown product	uk
TI-423	423	M	219	0	TI-423	656		ATG		3	0	3	cathepsin D	pm	NR-LIGHT	1e-51	56.1	cathepsin D	1E-051	gi|301030231	204	215	390	47	55	115	6	3	2	1		N	FOR	Triatoma infestans	Lysosomal aspartic protease OS=Aedes aegypti GN=AAEL006169 PE=1 SV=2	2E-046	sp|Q03168|ASPP_AEDAE	185	195	387	49	51	100	4	21	21	1	Aedes aegypti	Contig808_2
TI-416	416	G	30	0	TI-416	93			*	1	0	1	Unknown product	uk
TI-415	415	F	79	0	TI-415	240			*	1	0	1	Unknown product	uk				conserved hypothetical protein	0.36	gi|307332814	35.8	38	220	51	18	19	0	168	32	1		N	FOR	Streptomyces violaceusniger Tu 4113
TI-414	414	N	148	0	TI-414	441				1	0	1	Unknown product	uk				similar to CG4404 CG4404-PA	1E-007	gi|198424403	57.8	112	294	27	38	88	8	12	16	1		N	FOR	Ciona intestinalis	Transcription factor Adf-1 OS=Drosophila melanogaster GN=Adf1 PE=1 SV=2	0.001	sp|P05552|ADF1_DROME	42.4	87	262	22	34	84	21	25	16	1	Drosophila melanogaster	Contig2539_5
TI-413	413	H	146	0	TI-413	435				1	0	1	reverse transcriptase	te	NR-LIGHT	2e-08	14.1	reverse transcriptase	2E-008	gi|40457592	60.5	120	857	33	14	81	9	694	17	1		N	FOR	Drosophila melanogaster
TI-411	411	M	119	0	TI-411	360		ATG	*	1	0	1	ribosomal protein S25	ps	NR-LIGHT	2e-29	82.4	ribosomal protein S25	2E-029	gi|307006577	129	74	91	84	82	12	0	17	44	1		N	FOR	Hyalomma marginatum rufipes	40S ribosomal protein S25 OS=Spodoptera frugiperda GN=RpS25 PE=3 SV=1	1E-027	sp|Q962Q5|RS25_SPOFR	121	116	119	59	98	48	1	1	1	1	Spodoptera frugiperda	Contig16400_4
TI-410	410	C	131	0	TI-410	392				1	0	1	low-density lipoprotein receptor Pediculus humanus corporis	st	NR-LIGHT	1e-45	2.7	low-density lipoprotein receptor, putative	1E-045	gi|242018517	184	3894	4603	64	85	46	0	214	1	11		N	FOR	Pediculus humanus corporis	Low-density lipoprotein receptor-related protein 1 OS=Gallus gallus GN=LRP1 PE=2	8E-030	sp|P98157|LRP1_CHICK	128	3804	4543	45	84	73	7	341	3	8	Gallus gallus	Contig17836_23
TI-409	409	M	87	0	TI-409	264		ATG	*	1	0	1	pre-mRNA-splicing factor cwc15 Pediculus humanus corporis	uc	NR-LIGHT	1e-21	21.5	pre-mRNA-splicing factor cwc15, putative	1E-021	gi|242007951	103	49	232	96	22	2	0	1	1	1		N	FOR	Pediculus humanus corporis	Protein CWC15 homolog OS=Drosophila melanogaster GN=c12.1 PE=1 SV=1	1E-019	sp|Q9V3B6|CWC15_DROME	94.7	49	259	88	19	6	0	1	1	1	Drosophila melanogaster	Contig17852_77
TI-408	408	N	42	0	TI-408	125				1	0	1	Unknown product	uk				RDRP	0.61	gi|262092990	35	36	216	40	17	22	0	35	1	1		N	FOR	Slow bee paralysis virus
TI-407	407	S	53	0	TI-407	162			*	1	0	1	Aquaporin AQPcic Pediculus humanus corporis	tr	NR-LIGHT	2e-12	19.7	Aquaporin AQPcic, putative	2E-012	gi|242018018	73.6	51	263	65	20	18	0	198	1	1		N	FOR	Pediculus humanus corporis	Aquaporin-4 OS=Mus musculus GN=Aqp4 PE=2 SV=2	3E-010	sp|P55088|AQP4_MOUSE	63.9	50	323	50	16	25	0	210	1	1	Mus musculus	Contig4234_4
TI-406	406	F	20	0	TI-406	63			*	1	0	1	Unknown product	uk
TI-405	405	L	163	0	TI-405	492			*	1	0	1	oo18 RNA-binding protein - positive regulation of oskar mRNA translation - protein binding - germ cell development - oocyte axis specification -	ps	GO	1e-58	16.6	Cytoplasmic polyadenylation element-binding protein, putative	8E-060	gi|242019529	231	145	375	71	39	42	0	217	13	1		N	FOR	Pediculus humanus corporis	Cytoplasmic polyadenylation element-binding protein 1-A OS=Xenopus laevis	2E-057	sp|Q91572|CPE1A_XENLA	221	141	568	69	25	43	0	425	12	1	Xenopus laevis	Contig8391_3
TI-401	401	N	98	2.04082	TI-401	292				1	0	1	Unknown product	uk				hypothetical protein TcasGA2_TC012685	0.67	gi|270013992	35	17	277	83	6	3	0	84	16	1		N	FOR	Tribolium castaneum															Contig18031_39
TI-400	400	F	34	0	TI-400	100				1	0	1	Unknown product	uk
TI-40	40	A	233	0	TI-40	697				2	0	2	midasin - ribosomal large subunit assembly - rRNA processing - calcium ion binding - ATPase - ATP binding - nucleus	ps	GO	3e-41	3	hypothetical protein TcasGA2_TC012900	1E-074	gi|270016051	281	228	1457	62	16	87	10	1085	15	1		N	FOR	Tribolium castaneum	Midasin OS=Homo sapiens GN=MDN1 PE=1 SV=2	7E-053	sp|Q9NU22|MDN1_HUMAN	207	164	5596	60	3	66	7	5284	74	1	Homo sapiens	Contig17834_1
TI-396	396	H	125	0	TI-396	378			*	1	0	1	Unknown product	uk				kininogen 1, isoform CRA_b	5E-004	gi|119598586	45.4	68	644	33	11	46	6	262	37	1		N	FOR	Homo sapiens	Kininogen-1 OS=Homo sapiens GN=KNG1 PE=1 SV=2	1E-004	sp|P01042|KNG1_HUMAN	45.4	68	644	33	11	46	6	262	37	1	Homo sapiens	Contig18034_95
TI-389	389	V	12	0	TI-389	39			*	1	0	1	Unknown product	uk
TI-388	388	M	92	0	TI-388	279		ATG	*	1	0	1	60S ribosomal protein L37	ps	NR-LIGHT	3e-45	100	60S ribosomal protein L37	3E-045	gi|149689118	182	91	92	98	100	1	0	1	1	1		N	FOR	Triatoma infestans	60S ribosomal protein L37a OS=Drosophila melanogaster GN=RpL37A PE=1 SV=3	1E-037	sp|Q9VMU4|RL37A_DROME	154	90	92	84	99	14	0	1	1	1	Drosophila melanogaster	Contig17488_2
TI-387	387	K	15	0	TI-387	44				2	0	2	Unknown product	uk
TI-383	383	K	153	0.653595	TI-383	456				1	0	1	Unknown product	uk
TI-382	382	M	90	0	TI-382	273		ATG	*	2	0	2	CG9413 - amino acid transport - amino acid transmembrane transporter	tr	GO	3e-20	16.2	hypothetical protein TcasGA2_TC000583	2E-022	gi|270001710	106	89	533	54	17	41	0	444	1	1		N	FOR	Tribolium castaneum	B(0,+)-type amino acid transporter 1 OS=Homo sapiens GN=SLC7A9 PE=1 SV=1	8E-011	sp|P82251|BAT1_HUMAN	65.9	85	487	43	18	49	2	396	1	1	Homo sapiens	Contig17851_6
TI-381	381	C	61	0	TI-381	186			*	1	0	1	Unknown product	uk				chitinase, acidic, isoform CRA_c	1.6	gi|148675582	33.9	25	413	38	6	16	0	374	35	1		N	FOR	Mus musculus
TI-380	380	Q	37	0	TI-380	114			*	1	0	1	Unknown product	uk
TI-379	379	M	31	0	TI-379	96		ATG	*	1	0	1	Unknown product	uk
TI-377	377	F	79	1.26582	TI-377	236			*	1	0	1	Unknown product	uk
TI-37	37	E	12	0	TI-37	39			*	1	0	1	Unknown product	uk
TI-369	369	F	16	0	TI-369	51			*	1	0	1	Unknown product	uk
TI-367	367	R	167	0	TI-367	504			*	1	0	1	Amphoterin-induced protein 2 precursor Pediculus humanus corporis	uc	NR-LIGHT	7e-15	17.5	Amphoterin-induced protein 2 precursor, putative	7E-015	gi|242008917	82	111	648	48	17	59	28	508	22	1		N	FOR	Pediculus humanus corporis
TI-365	365	V	85	0	TI-365	258			*	1	0	1	Unknown product	uk				hypothetical protein Bm1_51770	4.9	gi|170594141	32.3	67	87	30	78	47	5	12	3	1		N	FOR	Brugia malayi
TI-360	360	M	124	0	TI-360	375		ATG	*	2	0	2	lola like - protein binding - chromatin silencing - nucleus - specific RNA polymerase II transcription factor - regulation of transcription from RNA	tm	GO	2e-53	92.9	similar to CG5738-PA	5E-056	gi|156550568	218	117	127	86	93	16	0	1	1	1		N	FOR	Acromyrmex echinatior	Longitudinals lacking protein-like OS=Drosophila melanogaster GN=lolal PE=1 SV=1	8E-053	sp|Q7KRI2|LOLAL_DROME	205	117	127	81	93	22	0	1	1	1	Drosophila melanogaster	Contig17830_41
TI-358	358	M	177	0	TI-358	528		ATG		1	0	1	Ras-related small GTPase	uc	NR-LIGHT	5e-95	76.6	Ras-related small GTPase	5E-095	gi|149898836	348	166	218	99	77	1	0	1	11	1		N	FOR	Triatoma infestans	Ras-related protein Rab-21 OS=Canis familiaris GN=RAB21 PE=3 SV=3	4E-074	sp|P55745|RAB21_CANFA	276	154	223	81	70	28	0	16	23	1	Canis familiaris	Contig17936_8
TI-357	357	M	51	0	TI-357	156		ATG	*	1	0	1	Unknown product	uk
TI-353	353	K	44	0	TI-353	135			*	1	0	1	Unknown product	uk
TI-35	35	Q	22	0	TI-35	69			*	1	0	1	Unknown product	uk
TI-347	347	I	36	0	TI-347	111			*	1	0	1	Unknown product	uk
TI-344	344	Y	75	0	TI-344	228			*	1	0	1	Unknown product	uk				hypothetical protein	2.6	gi|156097410	33.1	32	1238	36	3	21	0	959	26	1		N	FOR	Plasmodium vivax
TI-34	34	F	18	0	TI-34	57			*	1	0	1	Unknown product	uk
TI-338	338	L	184	2.17391	TI-338	555			*	1	0	1	Nuclear hormone receptor FTZ-F1 Pediculus humanus corporis	st	NR-LIGHT	9e-71	44.8	Nuclear hormone receptor FTZ-F1, putative	9E-071	gi|242019865	268	181	406	71	45	51	0	225	3	1		N	FOR	Pediculus humanus corporis	Nuclear hormone receptor FTZ-F1 OS=Bombyx mori GN=FTZ-F1 PE=1 SV=2	6E-064	sp|P49867|FTZF1_BOMMO	243	181	534	63	34	67	0	352	3	1	Bombyx mori	Contig17978_37
TI-335	335	V	128	0	TI-335	387			*	1	0	1	lipase	met/lipd	NR-LIGHT	2e-20	33.5	hypothetical protein TcasGA2_TC000236	3E-021	gi|270001417	102	107	304	46	36	59	4	197	9	1		N	FOR	Tribolium castaneum	Lipase member H OS=Xenopus tropicalis GN=liph PE=2 SV=1	4E-010	sp|Q5XGE9|LIPH_XENTR	63.5	82	460	39	18	51	6	210	9	1	Xenopus tropicalis	Contig15864_4
TI-334	334	W	106	0	TI-334	321			*	1	0	1	Unknown product	uk				Lian-Aa1 retrotransposon protein	3E-005	gi|2290213	49.3	80	1189	32	7	55	0	1107	14	1		N	FOR	Aedes aegypti															Contig15973_8
TI-332	332	C	157	0	TI-332	474			*	1	0	1	effete - protein ubiquitination - compound eye photoreceptor cell differentiation - regulation of R7 cell differentiation - oogenesis - compound eye	st	GO	4e-79	97.9	effete	5E-078	gi|24646906	291	143	147	97	98	3	0	4	14	1		N	FOR	Glossina morsitans morsitans	Ubiquitin-conjugating enzyme E2-17 kDa OS=Drosophila melanogaster GN=eff PE=1	1E-078	sp|P25867|UBCD1_DROME	291	143	147	97	98	3	0	4	14	1	Drosophila melanogaster	Contig18002_12
TI-330	330	F	54	0	TI-330	159				1	0	1	Unknown product	uk
TI-33	33	G	22	0	TI-33	69			*	1	0	1	Unknown product	uk
TI-327	327	G	30	0	TI-327	93			*	1	0	1	Unknown product	uk
TI-324	324	M	247	0	TI-324	744		ATG	*	3	0	3	multifunctional chaperone	pm	NR-LIGHT	0	93.9	multifunctional chaperone	1E-130	gi|263173438	468	231	247	98	94	4	0	1	1	1		N	FOR	Cimex lectularius	14-3-3 protein zeta OS=Bombyx mori GN=14-3-3zeta PE=2 SV=2	1E-124	sp|Q2F637|1433Z_BOMMO	444	231	247	92	94	17	0	1	1	1	Bombyx mori	Contig17897_7
TI-323	323	K	77	0	TI-323	234			*	1	0	1	bladder cancer-associated protein-like	uc	NR-LIGHT	1e-29	95	bladder cancer-associated protein-like	1E-029	gi|328786409	130	75	80	77	95	17	0	5	2	1		N	FOR	Apis mellifera	Bladder cancer-associated protein OS=Rattus norvegicus GN=Blcap PE=2 SV=1	2E-016	sp|P62950|BLCAP_RAT	84.3	68	87	55	79	34	7	5	2	1	Rattus norvegicus	Contig17383_11
TI-322	322	P	30	0	TI-322	93			*	1	0	1	Unknown product	uk
TI-321	321	C	56	0	TI-321	171			*	1	0	1	Unknown product	uk
TI-318	318	I	136	0	TI-318	411			*	1	0	1	Lysozyme P - antimicrobial humoral response - lysozyme	imm	GO	5e-25	101.4	lysozyme	1E-069	gi|32454476	263	125	139	99	91	1	0	14	11	1		N	FOR	Triatoma infestans	Lysozyme c-1 OS=Anopheles gambiae GN=AGAP007347 PE=2 SV=2	4E-033	sp|Q17005|LYSC1_ANOGA	139	133	140	47	96	71	1	7	2	1	Anopheles gambiae	Contig17801_61
TI-317	317	F	136	0	TI-317	411			*	1	0	1	NADH dehydrogenase subunit 5 Triatoma dimidiata	uc	NR-LIGHT	7e-46	22.6	NADH dehydrogenase subunit 5	7E-046	gi|11182469	184	128	570	74	23	33	0	32	8	1		N	FOR	Triatoma dimidiata	NADH-ubiquinone oxidoreductase chain 5 OS=Aedes aegypti GN=mt:ND5 PE=3 SV=1	4E-038	sp|B0FWD3|NU5M_AEDAE	156	127	580	60	22	51	0	33	9	1	Aedes aegypti	Contig8174_1
TI-316	316	L	68	0	TI-316	203				1	0	1	NADH dehydrogenase subunit 4 Triatoma dimidiata	uc	NR-LIGHT	2e-13	15.3	NADH dehydrogenase subunit 4	2E-013	gi|11182470	76.6	67	443	58	15	28	0	201	1	1		N	FOR	Triatoma dimidiata	NADH-ubiquinone oxidoreductase chain 4 OS=Rhipicephalus sanguineus GN=ND4 PE=3	8E-007	sp|O99825|NU4M_RHISA	52.4	67	433	41	16	40	0	193	1	1	Rhipicephalus sanguineus	Contig7881_1
TI-314	314	M	195	0	TI-314	584		ATG		1	0	1	tetraspanin 6 Apis mellifera	st	NR-LIGHT	2e-24	80	CD63 antigen-like isoform 2	2E-029	gi|328704941	130	138	239	46	58	75	5	66	62	1		N	FOR	Acyrthosiphon pisum	CD63 antigen OS=Felis catus GN=CD63 PE=2 SV=3	1E-018	sp|Q76B49|CD63_FELCA	92.8	192	238	31	81	138	23	10	8	1	Felis catus	Contig17398_11
TI-312	312	S	60	0	TI-312	183			*	1	0	1	Cytochrome c oxidase subunit 2	met/energy	SWISSP	6e-08	26.6	cytochrome c oxidase subunit II	3E-007	gi|49619215	56.2	59	224	50	27	30	0	5	1	1		N	FOR	Amblyomma triguttatum	Cytochrome c oxidase subunit 2 OS=Rhipicephalus sanguineus GN=COII PE=3 SV=1	6E-008	sp|O99819|COX2_RHISA	55.8	59	225	48	27	31	0	5	1	1	Rhipicephalus sanguineus
TI-311	311	M	155	0	TI-311	463		ATG		1	0	1	Cyclophilin 1 - salivary gland cell autophagic cell death - autophagic cell death - positive transcription elongation factor complex b - nuclear	st/apoptosis	GO	3e-71	67.8	cyclophilin-like protein	2E-072	gi|157361501	273	153	165	84	93	24	1	1	1	1		N	FOR	Phlebotomus papatasi	Peptidyl-prolyl cis-trans isomerase OS=Blattella germanica GN=CYPA PE=2 SV=1	3E-073	sp|P54985|PPIA_BLAGE	273	153	164	84	94	24	1	1	1	1	Blattella germanica	Contig17847_100
TI-31	31	T	41	0	TI-31	126			*	1	0	1	Unknown product	uk
TI-298	298	L	241	0	TI-298	726			*	1	0	1	AGAP005091-PB	uc	NR-LIGHT	2e-63	40.4	similar to AGAP005091-PB	2E-063	gi|189234389	244	232	581	56	40	103	8	264	5	1		N	FOR	Tribolium castaneum	Protein GDAP2 homolog OS=Drosophila pseudoobscura pseudoobscura GN=GA15091 PE=3	2E-053	sp|Q292F9|GDAP2_DROPS	209	210	542	52	39	100	4	327	29	1	Drosophila pseudoobscura pseudoobscura	Contig17945_17
TI-295	295	P	174	0	TI-295	525			*	3	0	3	CG5112 - lipid particle - fatty acid amide hydrolase	met/lipd	GO	1e-38	32.8	amidotransferase subunit A, putative	2E-046	gi|242007160	187	170	520	51	33	83	1	348	2	1		N	FOR	Pediculus humanus corporis	Fatty-acid amide hydrolase 2 OS=Homo sapiens GN=FAAH2 PE=2 SV=1	3E-036	sp|Q6GMR7|FAAH2_HUMAN	150	176	532	48	33	92	8	353	3	1	Homo sapiens	Contig17909_77
TI-290	290	I	163	0	TI-290	491			*	2	0	2	Golgi SNAP receptor complex member 1 isoform 2	st	NR-LIGHT	9e-30	66.9	hypothetical protein DAPPUDRAFT_238099	4E-030	gi|321474467	132	150	237	50	64	78	11	7	12	1		N	FOR	Daphnia pulex	Golgi SNAP receptor complex member 1 OS=Pongo abelii GN=GOSR1 PE=2 SV=1	1E-029	sp|Q5RBL6|GOSR1_PONAB	129	163	248	46	66	88	13	5	9	1	Pongo abelii	Contig17794_96
TI-284	284	L	85	0	TI-284	258			*	1	0	1	Unknown product	uk				E3 ubiquitin-protein ligase RNF14	4.0	gi|125630705	32.3	38	474	33	8	26	0	120	33	1		N	FOR	Bos taurus
TI-279	279	D	17	0	TI-279	54			*	1	0	1	Unknown product	uk
TI-278	278	T	188	0	TI-278	562				1	0	1	UDP-glucose:glycoprotein glucosyltransferase	met/carb	NR-LIGHT	1e-35	8.9	UDP-glucose:glycoprotein glucosyltransferase	1E-035	gi|328786702	150	173	1975	45	9	96	11	93	3	1		N	FOR	Apis mellifera	UDP-glucose:glycoprotein glucosyltransferase 2 OS=Homo sapiens GN=UGGT2 PE=1	1E-024	sp|Q9NYU1|UGGG2_HUMAN	112	171	1516	38	11	106	4	102	4	1	Homo sapiens	Contig17896_56
TI-277	277	D	61	0	TI-277	186			*	1	0	1	Unknown product	uk
TI-271	271	M	139	0	TI-271	415		ATG		1	0	1	40S ribosomal protein S4	ps	SWISSP	8e-72	53.2	similar to ribosomal protein S4e	2E-071	gi|91083095	269	138	261	91	53	12	0	1	1	1		N	FOR	Tribolium castaneum	40S ribosomal protein S4 OS=Carabus granulatus GN=RpS4 PE=2 SV=1	8E-072	sp|Q4GXU6|RS4_CARGR	268	138	261	90	53	13	0	1	1	1	Carabus granulatus	Contig17729_72
TI-268	268	M	131	0	TI-268	391		ATG		1	0	1	truncated histone H1	nr	NR-LIGHT	4e-34	37	truncated histone H1	4E-034	gi|149689210	145	72	197	94	37	4	0	39	40	1		N	FOR	Triatoma infestans	Histone H1 OS=Drosophila melanogaster GN=His1 PE=1 SV=1	1E-025	sp|P02255|H1_DROME	114	72	256	67	29	24	0	45	40	1	Drosophila melanogaster	Contig18070_21
TI-267	267	G	51	0	TI-267	156			*	1	0	1	Unknown product	uk
TI-262	262	M	167	0	TI-262	498		ATG		3	1	2	Unknown product	uk				hypothetical protein	0.16	gi|256070610	37.4	98	727	30	14	70	10	619	23	1		N	FOR	Schistosoma mansoni															Contig17963_38
TI-26	26	N	197	0	TI-26	594			*	1	0	1	ORF B (bases 1850-5560) first start codon at 2306	vir/	NR-LIGHT	2e-32	16	hypothetical protein TcasGA2_TC002009	1E-038	gi|270016691	161	191	797	43	24	109	3	73	4	1		N	FOR	Tribolium castaneum	Retrovirus-related Pol polyprotein from transposon opus OS=Drosophila	4E-008	sp|Q8I7P9|POL5_DROME	58.2	169	1003	30	17	132	23	803	8	1	Drosophila melanogaster	Contig18061_163
TI-254	254	M	72	0	TI-254	219		ATG	*	1	0	1	mitochondrial import inner membrane translocase subunit Tim9 B Pediculus humanus corporis	tr	NR-LIGHT	3e-11	54.1	hypothetical protein DAPPUDRAFT_52086	3E-012	gi|321468906	72.8	65	116	42	57	38	0	6	3	1		N	FOR	Daphnia pulex	Mitochondrial import inner membrane translocase subunit Tim9 B OS=Danio rerio	4E-010	sp|Q568N4|TIM9B_DANRE	63.5	62	202	42	31	36	0	16	3	1	Danio rerio	Contig17907_89
TI-243	243	Y	82	0	TI-243	244				1	0	1	Unknown product	uk				similar to chondroitin sulfate proteoglycan 3, partial	2.7	gi|198415233	33.1	48	1487	34	3	36	6	1269	17	1		N	FOR	Ciona intestinalis															Contig17728_54
TI-241	241	C	263	0	TI-241	792			*	2	0	2	hypothetical protein AaeL_AAEL012646 Aedes aegypti	uc	NR-LIGHT	1e-11	83.7	hypothetical protein AaeL_AAEL012646	1E-011	gi|157133150	72.8	218	277	32	79	156	25	37	30	1		N	FOR	Aedes aegypti															Contig18037_4
TI-240	240	N	44	0	TI-240	135			*	2	0	2	Unknown product	uk
TI-24	24	K	34	2.94118	TI-24	105			*	1	0	1	Unknown product	uk
TI-239	239	I	42	0	TI-239	129			*	3	0	3	Unknown product	uk
TI-234	234	M	155	0	TI-234	463		ATG		1	0	1	eukaryotic translation initiation factor 3 subunit Pediculus humanus corporis	ps	NR-LIGHT	2e-54	61	eukaryotic translation initiation factor 3 subunit, putative	2E-054	gi|242021197	213	209	344	51	61	102	55	2	1	1		N	FOR	Pediculus humanus corporis	Eukaryotic translation initiation factor 3 subunit H OS=Bombyx mori PE=2 SV=1	1E-053	sp|Q9GV27|EIF3H_BOMMO	208	208	337	52	62	100	55	9	2	1	Bombyx mori	Contig18047_205
TI-232	232	F	24	0	TI-232	75			*	1	0	1	Unknown product	uk
TI-230	230	M	200	0	TI-230	599		ATG		2	0	2	Kazal-type inhibitor	s/protinh	NR-LIGHT	2e-81	49.7	infestin 1-7 precursor	1E-111	gi|83637828	404	405	409	98	99	3	0	1	1	4		N	FOR	Triatoma infestans	Serine protease inhibitor dipetalogastin (Fragment) OS=Dipetalogaster maximus	2E-052	sp|O96790|DPGN_DIPMA	205	344	351	60	98	71	5	7	23	3	Dipetalogaster maximus	Contig17791_8
TI-23	23	K	289	0	TI-23	870			*	1	0	1	hypothetical mucin	uc	NR-LIGHT	2e-56	44.4	hypothetical mucin	2E-056	gi|307095162	221	127	288	90	44	12	1	161	1	1		N	FOR	Triatoma matogrossensis	Formin-binding protein 4 OS=Homo sapiens GN=FNBP4 PE=1 SV=3	8E-006	sp|Q8N3X1|FNBP4_HUMAN	51.2	82	1017	27	8	60	0	525	150	1	Homo sapiens	Contig17850_27
TI-227	227	M	139	0	TI-227	420		ATG	*	1	0	1	Lysozyme X - antimicrobial humoral response - defense response - lysozyme	imm	GO	1e-20	100	lysozyme 2	2E-063	gi|115338587	243	125	139	92	91	10	0	14	14	1		N	FOR	Triatoma infestans	Lysozyme c-1 OS=Anopheles gambiae GN=AGAP007347 PE=2 SV=2	1E-027	sp|Q17005|LYSC1_ANOGA	121	135	140	40	97	81	1	5	3	1	Anopheles gambiae	Contig17801_61
TI-223	223	F	40	0	TI-223	123			*	1	0	1	Unknown product	uk
TI-220	220	Y	150	0	TI-220	453			*	5	2	3	polyprotein Slow bee paralysis virus	vir/	NR-LIGHT	4e-21	3.8	polyprotein	4E-021	gi|296005647	102	114	2964	43	4	65	0	2849	9	1		N	FOR	Slow bee paralysis virus	Genome polyprotein OS=Rice tungro spherical virus (strain A) PE=1 SV=1	2E-006	sp|Q83034|POLG_RTSVA	51.6	82	3473	36	2	53	0	3318	26	1	Rice tungro spherical virus (strain A)
TI-22	22	I	157	1.27388	TI-22	469				1	0	1	localizes to the ER highly enriched in a structure marking nuclear-vacuolar junctions coimmunoprecipitates with elongases Fen1p and Sur4p"	met/lipd	GO	2e-13	48.3	similar to GA10597-PA	1E-047	gi|156543298	190	155	300	56	52	68	1	5	1	1		N	FOR	Nasonia vitripennis	Trans-2,3-enoyl-CoA reductase OS=Mus musculus GN=Tecr PE=1 SV=1	5E-035	sp|Q9CY27|TECR_MOUSE	146	158	308	45	52	86	2	8	1	1	Mus musculus	Contig18032_78
TI-219	219	K	69	0	TI-219	210			*	2	0	2	Pre-mRNA-splicing factor syf2	uc	SWISSP	3e-27	27.3	similar to GCIP-interacting protein p29 (P29)	6E-026	gi|118101581	118	67	252	82	27	12	0	185	2	1		N	FOR	Gallus gallus	Pre-mRNA-splicing factor syf2 OS=Gecko japonicus GN=syf2 PE=2 SV=1	3E-027	sp|Q6DV01|SYF2_GECJA	120	67	249	85	27	10	0	182	2	1	Gecko japonicus	Contig17854_91
TI-218	218	E	243	0	TI-218	728				2	1	1	polyprotein	vir/	NR-LIGHT	3e-47	8	polyprotein	3E-047	gi|297578409	190	232	2964	42	8	136	12	903	10	1		N	FOR	Slow bee paralysis virus
TI-214	214	M	127	0	TI-214	384		ATG	*	3	2	1	fatbody protein 3Rev-G1 Bombyx mori	uc	NR-LIGHT	2e-14	85.5	putative fatbody protein 3Rev-G1	2E-014	gi|306518634	80.1	100	118	41	86	59	0	17	27	1		N	FOR	Bombyx mori															Contig17940_72
TI-211	211	N	229	0	TI-211	686				1	0	1	cell division cycle 2-like 1 - apoptosis - regulation of mitosis - nucleus - blastocyst development	st/apoptosis	GO	5e-97	28.1	AGAP011055-PA	1E-103	gi|158285039	377	220	954	78	23	47	0	641	9	1		N	FOR	Anopheles gambiae str. PEST	Cyclin-dependent kinase 11B OS=Homo sapiens GN=CDK11B PE=1 SV=3	2E-096	sp|P21127|CD11B_HUMAN	352	217	795	73	27	58	3	519	9	1	Homo sapiens	Contig17852_67
TI-205	205	F	86	1.16279	TI-205	261			*	1	0	1	Unknown product	uk																																			Contig17971_250
TI-204	204	K	245	0.816327	TI-204	733				1	0	1	Unknown product	uk
TI-203	203	C	61	0	TI-203	186			*	1	0	1	Unknown product	uk
TI-200	200	M	162	0	TI-200	489		ATG	*	4	0	4	selenoprotein S-like Acyrthosiphon pisum	detox/ox	NR-LIGHT	2e-08	78.6	hypothetical protein TcasGA2_TC002967	2E-010	gi|270003698	67	133	165	29	81	94	2	23	22	1		N	FOR	Tribolium castaneum															Contig17971_367
TI-20	20	S	96	0	TI-20	291			*	1	0	1	Unknown product	uk				INT1 protein	1.5	gi|17511853	33.9	40	698	41	6	24	1	139	44	1		N	FOR	Homo sapiens
TI-2	2	V	130	3.07692	TI-2	393			*	1	0	1	ribosomal protein L6	ps	NR-LIGHT	2e-24	41.7	ribosomal protein L6	2E-024	gi|253683402	113	113	273	49	42	58	0	160	17	1		N	FOR	Nasonia vitripennis	60S ribosomal protein L6 OS=Chinchilla lanigera GN=RPL6 PE=2 SV=3	3E-016	sp|Q6QMZ4|RL6_CHILA	84	110	288	38	39	70	3	178	17	1	Chinchilla lanigera	Contig17971_343
TI-198	198	K	183	2.18579	TI-198	547				1	0	1	Unknown product	uk
TI-193	193	M	13	0	TI-193	42		ATG	*	1	0	1	Unknown product	uk
TI-189	189	M	76	0	TI-189	231		ATG	*	1	0	1	Unknown product	uk				hypothetical protein LOC100575189 isoform 1	1E-005	gi|328702895	50.8	56	334	46	17	32	3	5	8	1		N	FOR	Acyrthosiphon pisum
TI-188	188	M	156	0	TI-188	467		ATG		1	0	1	ENSANGP00000031364	uc	NR-LIGHT	2e-15	21.9	similar to ENSANGP00000031364	2E-015	gi|156538801	83.6	56	260	70	22	17	0	1	1	1		N	FOR	Nasonia vitripennis	Upstream activation factor subunit spp27 OS=Schizosaccharomyces pombe (strain	0.006	sp|O74503|UAF30_SCHPO	40	50	233	37	22	32	0	2	7	1	Schizosaccharomyces pombe (strain ATCC 38366 / 972)	Contig17372_9
TI-184	184	I	147	0	TI-184	440				2	0	2	DnaJ (Hsp40) homolog subfamily A member 3 - unfolded protein binding - positive regulation of T cell proliferation - T cell differentiation in the	tf	GO	3e-07	14.7	J domain-containing protein C21orf55, putative	3E-032	gi|242018813	139	113	367	60	31	45	4	33	38	1		N	FOR	Pediculus humanus corporis	DnaJ homolog subfamily C member 28 OS=Homo sapiens GN=DNAJC28 PE=1 SV=2	2E-015	sp|Q9NX36|DJC28_HUMAN	80.9	106	388	38	28	70	6	45	35	1	Homo sapiens	Contig4177_3
TI-183	183	P	195	1.53846	TI-183	588			*	2	0	2	cathepsin D	pm	NR-LIGHT	1e-49	50.2	cathepsin D	1E-049	gi|301030231	197	195	390	47	50	102	2	192	1	1		N	FOR	Triatoma infestans	Lysosomal aspartic protease OS=Aedes aegypti GN=AAEL006169 PE=1 SV=2	6E-036	sp|Q03168|ASPP_AEDAE	150	192	387	41	50	115	5	191	1	1	Aedes aegypti	Contig808_3
TI-182	182	M	169	0	TI-182	510		ATG	*	2	0	2	tubulin polymerization promoting protein	cs	NR-LIGHT	4e-82	100	tubulin polymerization promoting protein	4E-082	gi|307095196	305	165	166	91	100	14	0	1	4	1		N	FOR	Triatoma matogrossensis	TPPP family protein CG4893 OS=Drosophila melanogaster GN=CG4893 PE=2 SV=1	3E-051	sp|Q9VV43|Y4893_DROME	200	144	192	67	76	48	2	48	20	1	Drosophila melanogaster	Contig17878_69
TI-181	181	M	99	0	TI-181	300		ATG	*	1	0	1	mitochondrial NADH:ubiquinone oxidoreductase ESSS subunit	uc	NR-LIGHT	4e-22	69.2	similar to mitochondrial NADH:ubiquinone oxidoreductase ESSS subunit, putative	4E-022	gi|91090522	105	96	140	51	69	47	0	44	3	1		N	FOR	Tribolium castaneum															Contig16086_9
TI-180	180	D	215	4.65116	TI-180	642	Y			1	0	1	hypothetical protein TcasGA2_TC000274	uc	NR-LIGHT	7e-64	66.8	hypothetical protein TcasGA2_TC000274	7E-064	gi|270001445	245	201	302	63	67	73	1	75	14	1		N	FOR	Tribolium castaneum	Glycine N-acyltransferase-like protein 3 OS=Homo sapiens GN=GLYATL3 PE=2 SV=3	7E-004	sp|Q5SZD4|GLYL3_HUMAN	43.9	87	288	30	31	61	1	176	124	1	Homo sapiens	Contig17089_5
TI-178	178	P	156	0	TI-178	471			*	1	0	1	Unknown product	uk				LOW QUALITY PROTEIN: folliculin-interacting protein 2-like	3.4	gi|311262183	32.7	57	1044	35	6	38	1	409	55	1		N	FOR	Sus scrofa															Contig7471_2
TI-171	171	K	12	0	TI-171	39			*	1	0	1	Unknown product	uk
TI-170	170	G	96	0	TI-170	291			*	1	0	1	solute carrier organic anion transporter family member 5A1-like	tr	NR-LIGHT	1e-18	10.7	solute carrier organic anion transporter family member 5A1-like	1E-018	gi|328786599	94	76	717	49	11	39	0	639	3	1		N	FOR	Apis mellifera	Solute carrier organic anion transporter family member 5A1 OS=Homo sapiens	1E-004	sp|Q9H2Y9|SO5A1_HUMAN	45.1	45	848	36	5	29	0	704	2	1	Homo sapiens	Contig17959_89
TI-168	168	F	32	0	TI-168	99			*	3	1	2	Unknown product	uk
TI-162	162	A	54	0	TI-162	165			*	1	0	1	Unknown product	uk
TI-160	160	M	193	2.07254	TI-160	576		ATG		1	0	1	Luc7 homolog (S. cerevisiae)-like - negative regulation of striated muscle development - RS domain binding - protein binding - nucleus	cs	GO	5e-66	52	similar to splicing factor pTSR1, putative	2E-082	gi|91088003	306	192	328	75	59	47	0	1	1	1		N	FOR	Tribolium castaneum	Putative RNA-binding protein Luc7-like 2 OS=Homo sapiens GN=LUC7L2 PE=1 SV=2	4E-068	sp|Q9Y383|LC7L2_HUMAN	257	192	392	63	49	70	0	1	1	1	Homo sapiens	Contig17364_25
TI-158	158	M	47	0	TI-158	139		ATG		1	0	1	Unknown product	uk				similar to adducin	1E-005	gi|189234212	50.8	38	736	56	5	17	0	1	1	1		N	FOR	Tribolium castaneum															Contig17403_16
TI-153	153	M	262	4.58015	TI-153	784	Y	ATG		1	0	1	Aquaporin AQPAe.a Pediculus humanus corporis	tr	NR-LIGHT	9e-34	70.1	Aquaporin AQPAe.a, putative	9E-034	gi|242009228	145	196	281	41	70	115	1	41	6	1		N	FOR	Pediculus humanus corporis	Aquaporin AQPAe.a OS=Aedes aegypti GN=AAEL003512 PE=2 SV=2	5E-033	sp|Q9NHW7|AQP_AEDAE	141	206	249	38	83	127	1	6	2	1	Aedes aegypti	Contig16870_3
TI-15	15	C	19	0	TI-15	60			*	1	0	1	Unknown product	uk
TI-146	146	V	163	0	TI-146	492			*	1	0	1	Unknown product	uk				RE46519p	0.003	gi|39752609	43.1	468	645	27	73	102	32	29	16	6		N	FOR	Drosophila melanogaster															Contig17812_34
TI-145	145	M	136	0	TI-145	411		ATG	*	3	0	3	ribosomal protein L27 Acyrthosiphon pisum	ps	NR-LIGHT	3e-56	100.7	ribosomal protein L27	3E-056	gi|187121184	219	134	135	77	100	31	1	1	1	1		N	FOR	Acyrthosiphon pisum	60S ribosomal protein L27 OS=Danio rerio GN=rpl27 PE=2 SV=3	6E-043	sp|Q7ZV82|RL27_DANRE	172	135	136	64	100	48	2	1	1	1	Danio rerio	Contig17146_15
TI-141	141	L	71	0	TI-141	212				1	0	1	scavenger mRNA decapping enzyme DcpS Pediculus humanus corporis	uc	NR-LIGHT	6e-11	10.5	scavenger mRNA decapping enzyme DcpS, putative	6E-011	gi|242019462	68.6	58	560	52	11	28	0	74	4	1		N	FOR	Pediculus humanus corporis	Scavenger mRNA-decapping enzyme DcpS OS=Saccharomyces cerevisiae (strain ATCC	2E-006	sp|Q06151|DCPS_YEAST	51.2	41	350	47	12	22	0	109	7	1	Saccharomyces cerevisiae (strain ATCC 204508 / S288c)	Contig17819_68
TI-14	14	L	203	0	TI-14	612			*	2	0	2	probable maltase L-like	met/carb	NR-LIGHT	2e-33	34.3	ACYPI000002	1E-034	gi|239791724	148	193	304	40	64	119	6	107	3	1		N	FOR	Acyrthosiphon pisum	Probable maltase L OS=Drosophila melanogaster GN=LvpL PE=2 SV=2	4E-025	sp|P07192|MAL3_DROME	114	193	574	34	34	131	5	380	1	1	Drosophila melanogaster	Contig17590_30
TI-139	139	M	233	0	TI-139	698		ATG	*	1	0	1	eukaryotic translation initiation factor 3 subunit I-like	ps	NR-LIGHT	1e-91	72	eukaryotic translation initiation factor 3 subunit I-like	1E-091	gi|193599156	337	233	325	66	72	79	1	1	1	1		N	FOR	Acyrthosiphon pisum	Eukaryotic translation initiation factor 3 subunit I OS=Drosophila grimshawi	9E-083	sp|B4JB43|EIF3I_DROGR	306	235	326	63	72	87	3	1	1	1	Drosophila grimshawi	Contig17970_698
TI-13	13	F	84	0	TI-13	255			*	2	0	2	Unknown product	uk
TI-129	129	M	209	0	TI-129	630		ATG	*	6	1	5	cytochrome P450 CYP6BK17 Tribolium castaneum	detox/ox	NR-LIGHT	3e-52	42.5	similar to cytochrome P450 CYP6BK17	3E-052	gi|91084707	206	210	496	42	43	121	4	286	1	1		N	FOR	Tribolium castaneum	Probable cytochrome P450 6a14 OS=Drosophila melanogaster GN=Cyp6a14 PE=3 SV=2	2E-049	sp|Q9V4U7|C6A14_DROME	195	211	509	44	42	117	5	298	1	1	Drosophila melanogaster	Contig1437_2
TI-124	124	L	144	0	TI-124	435			*	1	0	1	Sec61alpha - head involution - dorsal closure - cuticle development - cell death - translocon complex - protein transporter	tr	GO	1e-71	29	Sec61 alpha 1 subunit	5E-074	gi|187177323	278	138	476	95	29	6	0	338	6	1		N	FOR	Acyrthosiphon pisum	Protein transport protein Sec61 subunit alpha isoform 2 OS=Pongo abelii	8E-070	sp|Q5NVM7|S61A2_PONAB	261	138	476	88	29	16	0	338	6	1	Pongo abelii	Contig17893_55
TI-123	123	D	155	0	TI-123	468			*	2	0	2	alpha-glucosidase binding-toxin receptor	s/	NR-LIGHT	5e-41	25.8	alpha-glucosidase binding-toxin receptor	5E-039	gi|159792926	161	150	588	48	26	79	2	59	1	1		N	FOR	Anopheles gambiae	Maltase 2 OS=Drosophila virilis GN=Mav2 PE=3 SV=1	2E-034	sp|O16099|MAL2_DROVI	144	149	524	46	29	81	3	67	1	1	Drosophila virilis	Contig17590_30
TI-117	117	F	25	0	TI-117	78			*	1	0	1	Unknown product	uk
TI-116	116	K	68	0	TI-116	207			*	1	0	1	Unknown product	uk
TI-115	115	M	27	0	TI-115	84		ATG	*	1	0	1	Unknown product	uk
TI-113	113	M	161	1.86335	TI-113	481		ATG		1	0	1	mitogen-activated protein kinase 14B isoform 1	st	NR-LIGHT	1e-76	56.6	p38 map kinase	7E-077	gi|218749850	287	203	356	68	57	64	43	1	1	1		N	FOR	Nasonia vitripennis	Mitogen-activated protein kinase 14B OS=Drosophila melanogaster GN=p38b PE=1	8E-070	sp|O61443|MK14B_DROME	262	206	365	61	57	80	46	5	1	1	Drosophila melanogaster	Contig17970_150
TI-110	110	C	44	0	TI-110	135			*	1	0	1	Unknown product	uk
TI-11	11	S	203	0	TI-11	612			*	1	0	1	discs large 1 - establishment of spindle orientation - postsynaptic membrane - asymmetric protein localization involved in cell fate determination -	st	GO	0	20.9	similar to discs large 1 CG1725-PK	1E-103	gi|189234387	376	202	729	86	28	27	0	527	1	1		N	FOR	Tribolium castaneum	Disks large 1 tumor suppressor protein OS=Drosophila melanogaster GN=dlg1 PE=1	1E-102	sp|P31007|DLG1_DROME	370	202	970	83	21	34	0	768	1	1	Drosophila melanogaster	Contig17160_2
TI-109	109	M	39	0	TI-109	120		ATG	*	1	0	1	Unknown product	uk
TI-106	106	H	56	0	TI-106	171			*	1	0	1	Unknown product	uk
TI-105	105	N	136	0	TI-105	411			*	1	0	1	Syntaxin 13 - cytokinesis after mitosis - cytokinesis after meiosis I - mitosis - male meiosis - female meiosis - vesicle-mediated transport	pe	GO	1e-21	44	hypothetical protein LOC551222	3E-028	gi|328782154	125	122	268	47	46	67	7	1	9	1		N	FOR	Apis mellifera	t-SNARE domain-containing protein 1 OS=Homo sapiens GN=TSNARE1 PE=2 SV=2	2E-008	sp|Q96NA8|TSNA1_HUMAN	58.2	123	513	24	24	94	10	235	21	1	Homo sapiens	Contig17857_58
TI-104	104	M	32	0	TI-104	99		ATG	*	1	0	1	Unknown product	uk
TI-10	10	D	36	0	TI-10	111			*	1	0	1	Unknown product	uk				nonstructural protein precursor	2E-008	gi|20451029	60.1	33	1795	79	2	7	0	973	1	1		N	FOR	Triatoma virus
[truncated: 69 more columns]

## Sheet: TI-pep-all
Protein name	Order Number	First residue	Seq size	%X	CDS name	Seq size	14 N's?	ATG?	*	Infected	Not Infected	Inf - nInf	Inf - nInf |H-I|	Description	uk	database	Evalue	coverage	Best match to NR-LIGHT protein database	E value	Match	Score	Extent of match	Length of best match	% identity	% Coverage	Mismatches	Gaps	First residue of match	First residue of sequence	Number of segments	Frame	Frame shift?	Orientation	Species of best match	Best match to SWISSP protein database	E value	Match	Score	Extent of match	Length of best match	% identity	% Coverage	Mismatches	Gaps	First residue of match	First residue of sequence	Number of segments	Species of best match
TI-2	2	V	130	3.07692	TI-2	393			*	1	0	1	1	ribosomal protein L6	ps	NR-LIGHT	2e-24	41.7	ribosomal protein L6	2E-024	gi|253683402	113	113	273	49	42	58	0	160	17	1		N	FOR	Nasonia vitripennis	60S ribosomal protein L6 OS=Chinchilla lanigera GN=RPL6 PE=2 SV=3	3E-016	sp|Q6QMZ4|RL6_CHILA	84	110	288	38	39	70	3	178	17	1	Chinchilla lanigera
TI-5	5	N	236	0	TI-5	706				3	0	3	3	Choline transporter-like protein 4	tr	SWISSP	2e-29	30.1	hypothetical protein TcasGA2_TC001323	5E-048	gi|270002312	193	200	753	45	27	112	5	386	31	1		N	FOR	Tribolium castaneum	CTL-like protein 2 OS=Anopheles gambiae GN=AGAP010343 PE=3 SV=4	4E-043	sp|Q7PRJ0|CTLH2_ANOGA	174	207	790	43	26	120	8	421	31	1	Anopheles gambiae
TI-6	6	F	77	0	TI-6	234			*	1	0	1	1	Unknown product	uk
TI-8	8	H	191	0	TI-8	576			*	0	1	-1	1	3-hydroxyacyl-CoA dehydratase 2	met/lipd	SWISSP	6e-35	74	ptpla domain protein	3E-049	gi|170050795	196	182	232	54	79	84	0	44	9	1		N	FOR	Culex quinquefasciatus	3-hydroxyacyl-CoA dehydratase 2 OS=Bos taurus GN=PTPLB PE=2 SV=2	6E-035	sp|Q2KIP8|HACD2_BOVIN	146	187	254	40	74	112	0	64	2	1	Bos taurus
TI-9	9	M	209	0	TI-9	625		ATG		0	1	-1	1	4-hydroxyphenylpyruvate dioxygenase Aedes aegypti	uc	NR-LIGHT	1e-89	54.8	4-hydroxyphenylpyruvate dioxygenase	1E-089	gi|157105932	331	208	381	73	55	56	0	1	1	1		N	FOR	Aedes aegypti	4-hydroxyphenylpyruvate dioxygenase OS=Rattus norvegicus GN=Hpd PE=1 SV=3	2E-071	sp|P32755|HPPD_RAT	268	208	393	59	53	85	0	1	1	1	Rattus norvegicus
TI-10	10	D	36	0	TI-10	111			*	1	0	1	1	Unknown product	uk				nonstructural protein precursor	2E-008	gi|20451029	60.1	33	1795	79	2	7	0	973	1	1		N	FOR	Triatoma virus
TI-11	11	S	203	0	TI-11	612			*	1	0	1	1	discs large 1 - establishment of spindle orientation - postsynaptic membrane - asymmetric protein localization involved in cell fate determination -	st	GO	0	20.9	similar to discs large 1 CG1725-PK	1E-103	gi|189234387	376	202	729	86	28	27	0	527	1	1		N	FOR	Tribolium castaneum	Disks large 1 tumor suppressor protein OS=Drosophila melanogaster GN=dlg1 PE=1	1E-102	sp|P31007|DLG1_DROME	370	202	970	83	21	34	0	768	1	1	Drosophila melanogaster
TI-12	12	P	185	0	TI-12	552				0	1	-1	1	cathepsin D	pm	NR-LIGHT	7e-81	47.1	cathepsin D	7E-081	gi|301030231	301	183	390	75	47	45	0	32	1	1		N	FOR	Triatoma infestans	Probable vacuolar protease A OS=Trichophyton verrucosum (strain HKI 0517)	2E-043	sp|D4DEN7|CARP_TRIVH	174	174	400	46	44	96	7	54	2	1	Trichophyton verrucosum (strain HKI 0517)
TI-13	13	F	84	0	TI-13	255			*	2	0	2	2	Unknown product	uk
TI-14	14	L	203	0	TI-14	612			*	2	0	2	2	probable maltase L-like	met/carb	NR-LIGHT	2e-33	34.3	ACYPI000002	1E-034	gi|239791724	148	193	304	40	64	119	6	107	3	1		N	FOR	Acyrthosiphon pisum	Probable maltase L OS=Drosophila melanogaster GN=LvpL PE=2 SV=2	4E-025	sp|P07192|MAL3_DROME	114	193	574	34	34	131	5	380	1	1	Drosophila melanogaster
TI-16	16	D	179	0	TI-16	534				0	1	-1	1	NBP2b protein	uc	NR-LIGHT	3e-28	82.1	similar to NBP2b protein, putative	3E-028	gi|189237012	126	164	207	43	80	96	8	10	2	1		N	FOR	Tribolium castaneum	Coiled-coil domain-containing protein 43 OS=Rattus norvegicus GN=Ccdc43 PE=2	8E-010	sp|Q5BK07|CCD43_RAT	63.2	145	222	31	66	105	13	22	2	1	Rattus norvegicus
TI-17	17	K	71	0	TI-17	216			*	0	1	-1	1	Unknown product	uk				DnaJ homolog, subfamily C, member 19	0.72	gi|297466452	35	60	116	30	53	46	6	34	3	1		N	FOR	Bos taurus
TI-18	18	A	40	0	TI-18	123			*	0	1	-1	1	Unknown product	uk
TI-20	20	S	96	0	TI-20	291			*	1	0	1	1	Unknown product	uk				INT1 protein	1.5	gi|17511853	33.9	40	698	41	6	24	1	139	44	1		N	FOR	Homo sapiens
TI-22	22	I	157	1.27388	TI-22	469				1	0	1	1	localizes to the ER highly enriched in a structure marking nuclear-vacuolar junctions coimmunoprecipitates with elongases Fen1p and Sur4p"	met/lipd	GO	2e-13	48.3	similar to GA10597-PA	1E-047	gi|156543298	190	155	300	56	52	68	1	5	1	1		N	FOR	Nasonia vitripennis	Trans-2,3-enoyl-CoA reductase OS=Mus musculus GN=Tecr PE=1 SV=1	5E-035	sp|Q9CY27|TECR_MOUSE	146	158	308	45	52	86	2	8	1	1	Mus musculus
TI-23	23	K	289	0	TI-23	870			*	1	0	1	1	hypothetical mucin	uc	NR-LIGHT	2e-56	44.4	hypothetical mucin	2E-056	gi|307095162	221	127	288	90	44	12	1	161	1	1		N	FOR	Triatoma matogrossensis	Formin-binding protein 4 OS=Homo sapiens GN=FNBP4 PE=1 SV=3	8E-006	sp|Q8N3X1|FNBP4_HUMAN	51.2	82	1017	27	8	60	0	525	150	1	Homo sapiens
TI-26	26	N	197	0	TI-26	594			*	1	0	1	1	ORF B (bases 1850-5560) first start codon at 2306	vir/	NR-LIGHT	2e-32	16	hypothetical protein TcasGA2_TC002009	1E-038	gi|270016691	161	191	797	43	24	109	3	73	4	1		N	FOR	Tribolium castaneum	Retrovirus-related Pol polyprotein from transposon opus OS=Drosophila	4E-008	sp|Q8I7P9|POL5_DROME	58.2	169	1003	30	17	132	23	803	8	1	Drosophila melanogaster
TI-31	31	T	41	0	TI-31	126			*	1	0	1	1	Unknown product	uk
TI-34	34	F	18	0	TI-34	57			*	1	0	1	1	Unknown product	uk
TI-35	35	Q	22	0	TI-35	69			*	1	0	1	1	Unknown product	uk
TI-36	36	F	50	0	TI-36	148				1	0	1	1	Unknown product	uk
TI-38	38	M	106	8.49057	TI-38	321	Y	ATG	*	0	3	-3	3	Unknown product	uk				hypothetical protein LOC551774	1E-004	gi|66506802	47.4	40	116	65	35	15	2	1	1	1		N	FOR	Apis mellifera
TI-39	39	M	230	0	TI-39	693		ATG	*	0	1	-1	1	CG1542 - molecular_function - nucleolus - rRNA processing	uc	GO	2e-32	54	CG1542	2E-031	gi|21357767	137	164	307	43	54	94	18	23	54	1		N	FOR	synthetic construct	Probable rRNA-processing protein EBP2 homolog OS=Drosophila melanogaster	6E-032	sp|Q9V9Z9|EBP2_DROME	137	164	307	43	54	94	18	23	54	1	Drosophila melanogaster
TI-40	40	A	233	0	TI-40	697				2	0	2	2	midasin - ribosomal large subunit assembly - rRNA processing - calcium ion binding - ATPase - ATP binding - nucleus	ps	GO	3e-41	3	hypothetical protein TcasGA2_TC012900	1E-074	gi|270016051	281	228	1457	62	16	87	10	1085	15	1		N	FOR	Tribolium castaneum	Midasin OS=Homo sapiens GN=MDN1 PE=1 SV=2	7E-053	sp|Q9NU22|MDN1_HUMAN	207	164	5596	60	3	66	7	5284	74	1	Homo sapiens
TI-41	41	M	95	0	TI-41	288		ATG	*	1	2	-1	1	lethal (2) 06225 - lipid particle - mitochondrial proton-transporting ATP synthase complex coupling factor F(o) - proton transport -	tr	GO	9e-27	92.9	AGAP009491-PA	4E-026	gi|118780527	119	90	99	56	92	40	0	9	3	1		N	FOR	Anopheles gambiae str. PEST	ATP synthase subunit g, mitochondrial OS=Pongo abelii GN=ATP5L PE=3 SV=1	3E-023	sp|Q5RFH0|ATP5L_PONAB	107	101	103	53	99	47	11	2	3	1	Pongo abelii
TI-44	44	L	196	6.12245	TI-44	591			*	1	0	1	1	proteasome subunit beta type 58	prot	NR-LIGHT	3e-54	50	similar to proteasome subunit beta type 5,8	3E-054	gi|91085931	213	141	279	68	51	45	0	31	53	1		N	FOR	Tribolium castaneum	Proteasome subunit beta type-5 OS=Rattus norvegicus GN=Psmb5 PE=1 SV=3	1E-038	sp|P28075|PSB5_RAT	159	111	263	65	43	39	0	51	83	1	Rattus norvegicus
TI-45	45	D	20	0	TI-45	63			*	0	1	-1	1	Unknown product	uk
TI-47	47	M	133	0	TI-47	402		ATG	*	1	0	1	1	heme-binding protein	uc	NR-LIGHT	6e-37	97	heme-binding protein	6E-037	gi|149689110	154	139	143	55	98	63	7	1	1	1		N	FOR	Triatoma infestans
TI-48	48	P	188	0	TI-48	567			*	1	0	1	1	AGAP004450-PA Tribolium castaneum	uc	NR-LIGHT	8e-18	38.5	similar to AGAP004450-PA	8E-018	gi|91081053	92	121	322	40	38	74	2	144	49	1		N	FOR	Tribolium castaneum	Estradiol 17-beta-dehydrogenase 2 OS=Rattus norvegicus GN=Hsd17b2 PE=2 SV=1	0.003	sp|Q62730|DHB2_RAT	41.6	103	381	31	27	75	11	161	49	1	Rattus norvegicus
TI-50	50	L	226	0	TI-50	676				1	0	1	1	Unknown product	uk				hypothetical protein	5E-010	gi|156544907	66.6	1006	1493	23	67	139	2	473	22	3		N	FOR	Nasonia vitripennis
TI-51	51	F	92	0	TI-51	279			*	0	1	-1	1	Unknown product	uk
TI-52	52	I	35	0	TI-52	108			*	1	0	1	1	Unknown product	uk
TI-53	53	S	100	0	TI-53	303			*	1	0	1	1	CG7920 - lipid particle - 4-hydroxybutyrate CoA-transferase	uc	GO	1e-29	17.6	CG7920	3E-028	gi|21358615	125	83	477	67	18	27	0	114	4	1		N	FOR	synthetic construct	4-hydroxybutyrate coenzyme A transferase OS=Clostridium kluyveri (strain ATCC	2E-013	sp|P38942|CAT2_CLOK5	74.7	85	429	40	20	51	0	72	1	1	Clostridium kluyveri (strain ATCC 8527 / DSM 555 / NCIMB 10680)
TI-58	58	L	22	9.09091	TI-58	69			*	1	0	1	1	Unknown product	uk
TI-61	61	M	103	18.4466	TI-61	312	Y	ATG	*	1	0	1	1	enhancer of rudimentary - transcription regulator - regulation of transcription from RNA polymerase II promoter	tm	GO	5e-25	99	hypothetical protein DAPPUDRAFT_303646	5E-026	gi|321454163	118	100	103	59	98	41	0	1	1	1		N	FOR	Daphnia pulex	Protein enhancer of rudimentary OS=Drosophila virilis GN=e(r) PE=3 SV=1	1E-024	sp|Q94554|ER_DROVI	111	102	104	54	99	49	8	1	1	1	Drosophila virilis
TI-63	63	Y	181	0	TI-63	540				1	0	1	1	cathepsin D (lysosomal aspartyl protease)	pm	NR-LIGHT	2e-37	82.2	cathepsin D (lysosomal aspartyl protease)	2E-037	gi|226476910	157	170	220	41	78	105	11	17	2	1		N	FOR	Schistosoma japonicum	Cathepsin D OS=Gallus gallus GN=CTSD PE=1 SV=1	1E-035	sp|Q05744|CATD_CHICK	149	125	398	50	32	62	0	70	52	1	Gallus gallus
TI-64	64	P	223	0	TI-64	667				2	0	2	2	heterogeneous nuclear ribonucleoprotein 87F-like	uc	NR-LIGHT	7e-62	51	heterogeneous nuclear ribonucleoprotein 87F-like	7E-062	gi|328709829	238	172	349	65	50	62	9	5	39	1		N	FOR	Acyrthosiphon pisum	Heterogeneous nuclear ribonucleoprotein A1 OS=Drosophila melanogaster GN=Hrb98DE	3E-059	sp|P07909|ROA1_DROME	228	178	365	60	49	72	2	22	35	2	Drosophila melanogaster
TI-65	65	G	134	0	TI-65	401				1	0	1	1	selenide water dikinase selenocysteine-containing - tRNA aminoacylation for protein translation - selenide water dikinase	ps	GO	4e-09	36.5	selenophosphate synthase	2E-033	gi|157115185	143	134	277	49	49	68	1	65	1	1		N	FOR	Aedes aegypti	Selenide, water dikinase 1 OS=Mus musculus GN=Sephs1 PE=2 SV=1	7E-034	sp|Q8BH69|SPS1_MOUSE	142	133	392	48	34	69	0	162	1	1	Mus musculus
TI-67	67	M	150	0	TI-67	449		ATG		1	0	1	1	Unknown product	uk
TI-71	71	M	129	0	TI-71	390		ATG	*	1	0	1	1	cytochrome P450 Cyp6b29 Bombyx mori	detox/ox	NR-LIGHT	1e-18	20	cytochrome P450 Cyp6b29	1E-018	gi|163838686	94	99	505	44	20	56	1	25	29	1		N	FOR	Bombyx mori	Cytochrome P450 6B1 OS=Papilio polyxenes GN=CYP6B1 PE=1 SV=1	2E-014	sp|Q04552|CP6B1_PAPPO	77.8	80	498	43	16	46	0	22	28	1	Papilio polyxenes
TI-72	72	S	196	0	TI-72	591			*	0	1	-1	1	Unknown product	uk				CG17826	2E-005	gi|24663027	51.2	551	751	22	74	156	21	29	13	6		N	FOR	Drosophila melanogaster
TI-75	75	M	117	0	TI-75	354		ATG	*	1	0	1	1	vesicle-associated membrane protein 3 (cellubrevin) - molecular_function	pe	GO	2e-20	65.6	hypothetical protein DAPPUDRAFT_218600	3E-021	gi|321456621	102	66	132	71	51	19	0	29	15	1		N	FOR	Daphnia pulex	Synaptobrevin-1 OS=Caenorhabditis briggsae GN=snb-1 PE=3 SV=1	4E-019	sp|Q60WU2|SYB1_CAEBR	93.2	64	108	67	60	21	0	21	17	1	Caenorhabditis briggsae
TI-76	76	G	198	0	TI-76	595			*	1	0	1	1	inositol-trisphosphate 3-kinase A-like	uc	NR-LIGHT	1e-86	47.4	inositol-trisphosphate 3-kinase A-like	1E-086	gi|328708818	320	197	417	73	47	53	0	157	1	1		N	FOR	Acyrthosiphon pisum	Inositol-trisphosphate 3-kinase C OS=Mus musculus GN=Itpkc PE=2 SV=1	8E-038	sp|Q7TS72|IP3KC_MOUSE	156	199	678	42	29	116	6	432	3	1	Mus musculus
TI-77	77	P	163	24.5399	TI-77	492	Y		*	1	0	1	1	Periplasmic trehalase	uc	SWISSP	2e-56	28	trehalase	6E-056	gi|297520991	218	160	497	69	32	49	0	337	3	1		N	FOR	Escherichia coli OP50	Periplasmic trehalase OS=Escherichia coli (strain SE11) GN=treA PE=3 SV=1	2E-056	sp|B6I9Q8|TREA_ECOSE	218	160	565	69	28	49	0	405	3	1	Escherichia coli (strain SE11)
TI-78	78	M	233	0	TI-78	702		ATG	*	0	1	-1	1	translocon-associated protein subunit alpha Tribolium castaneum	pe	NR-LIGHT	1e-57	71	similar to translocon-associated protein subunit alpha	1E-057	gi|91079082	225	202	287	57	71	86	3	1	1	1		N	FOR	Tribolium castaneum	Translocon-associated protein subunit alpha OS=Pongo abelii GN=SSR1 PE=2 SV=1	1E-044	sp|Q5R4X4|SSRA_PONAB	179	165	291	50	57	88	12	69	53	1	Pongo abelii
TI-80	80	S	92	0	TI-80	278			*	1	0	1	1	Unknown product	uk				hypothetical protein	5.2	gi|256079598	32	34	741	45	5	19	0	489	54	1		N	FOR	Schistosoma mansoni
TI-83	83	F	31	0	TI-83	96			*	1	0	1	1	Unknown product	uk
TI-84	84	V	186	0	TI-84	557				0	4	-4	4	Unknown product	uk				conserved Plasmodium protein, unknown function	3.4	gi|124511844	33.5	56	2206	33	3	41	5	649	29	1		N	FOR	Plasmodium falciparum 3D7
TI-85	85	L	49	0	TI-85	150			*	1	0	1	1	vesicle associated protein	pe	NR-LIGHT	3e-07	4.1	hypothetical protein TcasGA2_TC005990	3E-007	gi|270011899	56.2	47	230	56	21	21	0	180	1	1		N	FOR	Tribolium castaneum
TI-86	86	M	163	4.90798	TI-86	492	Y	ATG	*	1	0	1	1	Unknown product	uk				jupiter, isoform C	3E-004	gi|24645999	46.6	40	197	51	21	21	2	18	24	1		N	FOR	synthetic construct	Microtubule-associated protein Jupiter OS=Drosophila melanogaster GN=Jupiter	8E-005	sp|Q9I7K0|JUPIT_DROME	46.2	37	208	55	18	18	2	21	27	1	Drosophila melanogaster
TI-89	89	N	11	0	TI-89	36			*	1	3	-2	2	Unknown product	uk
TI-90	90	L	226	0	TI-90	676				2	0	2	2	Probable G-protein coupled receptor 158	st	SWISSP	2e-11	13.1	CG31195	1E-098	gi|281362159	361	526	807	74	65	59	1	267	1	2		N	FOR	Drosophila melanogaster	Probable G-protein coupled receptor 158 OS=Mus musculus GN=Gpr158 PE=1 SV=2	2E-011	sp|Q8C419|GP158_MOUSE	68.9	140	1200	27	12	114	22	221	25	1	Mus musculus
TI-91	91	G	133	1.50376	TI-91	396				1	0	1	1	hypothetical protein TcasGA2_TC012551	uc	NR-LIGHT	7e-24	3	hypothetical protein TcasGA2_TC012551	7E-024	gi|270013885	111	116	3944	48	3	61	2	3282	3	1		N	FOR	Tribolium castaneum	Hemocytin OS=Bombyx mori PE=2 SV=1	1E-011	sp|P98092|HMCT_BOMMO	68.6	113	3133	36	4	74	4	2284	5	1	Bombyx mori
TI-95	95	V	25	0	TI-95	78			*	0	1	-1	1	Unknown product	uk
TI-100	100	M	66	0	TI-100	201		ATG	*	1	1	0	0	Unknown product	uk				hypothetical protein TcasGA2_TC000791	0.001	gi|270001890	44.3	50	68	44	75	30	5	6	2	1		N	FOR	Tribolium castaneum
TI-102	102	L	85	0	TI-102	258			*	1	1	0	0	10 kDa heat shock protein Pediculus humanus corporis	pm	NR-LIGHT	7e-33	76.1	10 kDa heat shock protein, putative	7E-033	gi|242016119	141	82	109	80	76	16	0	27	2	1		N	FOR	Pediculus humanus corporis	10 kDa heat shock protein, mitochondrial OS=Schistosoma japonicum GN=SJCHGC01960	1E-022	sp|Q5DC69|CH10_SCHJA	104	81	102	61	80	32	1	20	2	1	Schistosoma japonicum
TI-104	104	M	32	0	TI-104	99		ATG	*	1	0	1	1	Unknown product	uk
TI-105	105	N	136	0	TI-105	411			*	1	0	1	1	Syntaxin 13 - cytokinesis after mitosis - cytokinesis after meiosis I - mitosis - male meiosis - female meiosis - vesicle-mediated transport	pe	GO	1e-21	44	hypothetical protein LOC551222	3E-028	gi|328782154	125	122	268	47	46	67	7	1	9	1		N	FOR	Apis mellifera	t-SNARE domain-containing protein 1 OS=Homo sapiens GN=TSNARE1 PE=2 SV=2	2E-008	sp|Q96NA8|TSNA1_HUMAN	58.2	123	513	24	24	94	10	235	21	1	Homo sapiens
TI-106	106	H	56	0	TI-106	171			*	1	0	1	1	Unknown product	uk
TI-108	108	R	20	0	TI-108	63			*	1	1	0	0	Unknown product	uk
TI-109	109	M	39	0	TI-109	120		ATG	*	1	0	1	1	Unknown product	uk
TI-110	110	C	44	0	TI-110	135			*	1	0	1	1	Unknown product	uk
TI-112	112	M	138	0	TI-112	417		ATG	*	0	1	-1	1	NADH dehydrogenase subunit 5 Triatoma dimidiata	uc	NR-LIGHT	2e-52	24.2	NADH dehydrogenase subunit 5	2E-052	gi|11182469	206	137	570	73	24	37	0	329	1	1		N	FOR	Triatoma dimidiata	NADH-ubiquinone oxidoreductase chain 5 OS=Drosophila melanogaster GN=mt:ND5 PE=2	4E-027	sp|P18932|NU5M_DROME	119	138	572	42	24	80	1	326	1	1	Drosophila melanogaster
TI-113	113	M	161	1.86335	TI-113	481		ATG		1	0	1	1	mitogen-activated protein kinase 14B isoform 1	st	NR-LIGHT	1e-76	56.6	p38 map kinase	7E-077	gi|218749850	287	203	356	68	57	64	43	1	1	1		N	FOR	Nasonia vitripennis	Mitogen-activated protein kinase 14B OS=Drosophila melanogaster GN=p38b PE=1	8E-070	sp|O61443|MK14B_DROME	262	206	365	61	57	80	46	5	1	1	Drosophila melanogaster
TI-115	115	M	27	0	TI-115	84		ATG	*	1	0	1	1	Unknown product	uk
TI-116	116	K	68	0	TI-116	207			*	1	0	1	1	Unknown product	uk
TI-117	117	F	25	0	TI-117	78			*	1	0	1	1	Unknown product	uk
TI-118	118	S	272	6.98529	TI-118	819	Y		*	1	0	1	1	Tetraspanin 2A - integral to membrane	st	GO	4e-25	81.9	similar to EG:8D8.7	9E-030	gi|156552185	132	198	244	33	82	133	1	12	9	1		N	FOR	Nasonia vitripennis	CD81 protein OS=Saguinus oedipus GN=CD81 PE=2 SV=1	1E-009	sp|Q9N0J9|CD81_SAGOE	63.9	150	236	29	64	109	13	10	17	1	Saguinus oedipus
TI-121	121	N	154	9.74026	TI-121	465	Y		*	0	1	-1	1	nonstructural protein precursor Triatoma virus	vir/	NR-LIGHT	2e-53	8.4	nonstructural protein precursor	2E-053	gi|20451029	209	151	1795	67	8	50	0	211	3	1		N	FOR	Triatoma virus
TI-122	122	E	123	30.8943	TI-122	368	Y			0	1	-1	1	Unknown product	uk
TI-123	123	D	155	0	TI-123	468			*	2	0	2	2	alpha-glucosidase binding-toxin receptor	s/	NR-LIGHT	5e-41	25.8	alpha-glucosidase binding-toxin receptor	5E-039	gi|159792926	161	150	588	48	26	79	2	59	1	1		N	FOR	Anopheles gambiae	Maltase 2 OS=Drosophila virilis GN=Mav2 PE=3 SV=1	2E-034	sp|O16099|MAL2_DROVI	144	149	524	46	29	81	3	67	1	1	Drosophila virilis
TI-124	124	L	144	0	TI-124	435			*	1	0	1	1	Sec61alpha - head involution - dorsal closure - cuticle development - cell death - translocon complex - protein transporter	tr	GO	1e-71	29	Sec61 alpha 1 subunit	5E-074	gi|187177323	278	138	476	95	29	6	0	338	6	1		N	FOR	Acyrthosiphon pisum	Protein transport protein Sec61 subunit alpha isoform 2 OS=Pongo abelii	8E-070	sp|Q5NVM7|S61A2_PONAB	261	138	476	88	29	16	0	338	6	1	Pongo abelii
TI-125	125	S	222	3.15315	TI-125	669			*	0	1	-1	1	hydroxyprostaglandin dehydrogenase 15 (NAD) - NAD or NADH binding - negative regulation of cell cycle - 15-hydroxyprostaglandin dehydrogenase (NAD+)	st	GO	9e-25	69.1	15-hydroxyprostaglandin dehydrogenase	1E-032	gi|328779312	141	178	272	39	66	110	4	45	23	1		N	FOR	Apis mellifera	15-hydroxyprostaglandin dehydrogenase	3E-030	sp|Q8VCC1|PGDH_MOUSE	131	168	269	36	63	108	2	28	23	1	Mus musculus
TI-126	126	F	265	0	TI-126	794				2	4	-2	2	NADH dehydrogenase I H subunit - NADH dehydrogenase (ubiquinone) - mitochondrial electron transport NADH to ubiquinone	met/energy	GO	2e-47	69.7	NADH dehydrogenase subunit I	1E-126	gi|291621807	454	260	303	89	86	28	0	1	2	1		N	FOR	Triatoma infestans	NADH-ubiquinone oxidoreductase chain 1 OS=Anopheles quadrimaculatus GN=ND1 PE=3	5E-089	sp|P33502|NU1M_ANOQU	327	260	314	61	83	101	0	8	2	1	Anopheles quadrimaculatus
TI-127	127	W	51	0	TI-127	156			*	1	1	0	0	Unknown product	uk
TI-129	129	M	209	0	TI-129	630		ATG	*	6	1	5	5	cytochrome P450 CYP6BK17 Tribolium castaneum	detox/ox	NR-LIGHT	3e-52	42.5	similar to cytochrome P450 CYP6BK17	3E-052	gi|91084707	206	210	496	42	43	121	4	286	1	1		N	FOR	Tribolium castaneum	Probable cytochrome P450 6a14 OS=Drosophila melanogaster GN=Cyp6a14 PE=3 SV=2	2E-049	sp|Q9V4U7|C6A14_DROME	195	211	509	44	42	117	5	298	1	1	Drosophila melanogaster
TI-132	132	G	48	0	TI-132	147			*	0	1	-1	1	Unknown product	uk
TI-139	139	M	233	0	TI-139	698		ATG	*	1	0	1	1	eukaryotic translation initiation factor 3 subunit I-like	ps	NR-LIGHT	1e-91	72	eukaryotic translation initiation factor 3 subunit I-like	1E-091	gi|193599156	337	233	325	66	72	79	1	1	1	1		N	FOR	Acyrthosiphon pisum	Eukaryotic translation initiation factor 3 subunit I OS=Drosophila grimshawi	9E-083	sp|B4JB43|EIF3I_DROGR	306	235	326	63	72	87	3	1	1	1	Drosophila grimshawi
TI-140	140	K	13	0	TI-140	42			*	0	1	-1	1	Unknown product	uk
TI-141	141	L	71	0	TI-141	212				1	0	1	1	scavenger mRNA decapping enzyme DcpS Pediculus humanus corporis	uc	NR-LIGHT	6e-11	10.5	scavenger mRNA decapping enzyme DcpS, putative	6E-011	gi|242019462	68.6	58	560	52	11	28	0	74	4	1		N	FOR	Pediculus humanus corporis	Scavenger mRNA-decapping enzyme DcpS OS=Saccharomyces cerevisiae (strain ATCC	2E-006	sp|Q06151|DCPS_YEAST	51.2	41	350	47	12	22	0	109	7	1	Saccharomyces cerevisiae (strain ATCC 204508 / S288c)
TI-143	143	P	104	25	TI-143	315			*	0	1	-1	1	Unknown product	uk				hypothetical protein TcasGA2_TC010743	0.078	gi|270016597	38.1	31	546	50	6	16	0	328	72	1		N	FOR	Tribolium castaneum
TI-144	144	K	41	0	TI-144	126			*	2	3	-1	1	Unknown product	uk
TI-145	145	M	136	0	TI-145	411		ATG	*	3	0	3	3	ribosomal protein L27 Acyrthosiphon pisum	ps	NR-LIGHT	3e-56	100.7	ribosomal protein L27	3E-056	gi|187121184	219	134	135	77	100	31	1	1	1	1		N	FOR	Acyrthosiphon pisum	60S ribosomal protein L27 OS=Danio rerio GN=rpl27 PE=2 SV=3	6E-043	sp|Q7ZV82|RL27_DANRE	172	135	136	64	100	48	2	1	1	1	Danio rerio
TI-146	146	V	163	0	TI-146	492			*	1	0	1	1	Unknown product	uk				RE46519p	0.003	gi|39752609	43.1	468	645	27	73	102	32	29	16	6		N	FOR	Drosophila melanogaster
TI-147	147	Q	42	52.3809	TI-147	129	Y		*	1	0	1	1	Unknown product	uk
TI-151	151	M	129	0	TI-151	390		ATG	*	1	5	-4	4	salivary secreted protein	s/	NR-LIGHT	4e-41	100	salivary secreted protein	4E-041	gi|149689094	168	128	129	65	100	44	1	1	1	1		N	FOR	Triatoma infestans
TI-152	152	S	200	0	TI-152	603			*	0	9	-9	9	hypothetical protein LOC100579034 partial	uc	NR-LIGHT	8e-24	22.7	hypothetical protein LOC100579034, partial	8E-024	gi|328790765	112	153	699	34	22	104	5	481	36	1		N	FOR	Apis mellifera	NMDA receptor-regulated protein 2 OS=Homo sapiens GN=NARG2 PE=1 SV=2	2E-005	sp|Q659A1|NARG2_HUMAN	49.3	99	982	27	10	75	3	773	78	1	Homo sapiens
TI-153	153	M	262	4.58015	TI-153	784	Y	ATG		1	0	1	1	Aquaporin AQPAe.a Pediculus humanus corporis	tr	NR-LIGHT	9e-34	70.1	Aquaporin AQPAe.a, putative	9E-034	gi|242009228	145	196	281	41	70	115	1	41	6	1		N	FOR	Pediculus humanus corporis	Aquaporin AQPAe.a OS=Aedes aegypti GN=AAEL003512 PE=2 SV=2	5E-033	sp|Q9NHW7|AQP_AEDAE	141	206	249	38	83	127	1	6	2	1	Aedes aegypti
TI-156	156	E	49	12.2449	TI-156	150			*	1	0	1	1	Unknown product	uk				short trialysin 1	1E-009	gi|149689036	64.3	48	76	63	64	18	0	28	1	1		N	FOR	Triatoma infestans
TI-158	158	M	47	0	TI-158	139		ATG		1	0	1	1	Unknown product	uk				similar to adducin	1E-005	gi|189234212	50.8	38	736	56	5	17	0	1	1	1		N	FOR	Tribolium castaneum
TI-160	160	M	193	2.07254	TI-160	576		ATG		1	0	1	1	Luc7 homolog (S. cerevisiae)-like - negative regulation of striated muscle development - RS domain binding - protein binding - nucleus	cs	GO	5e-66	52	similar to splicing factor pTSR1, putative	2E-082	gi|91088003	306	192	328	75	59	47	0	1	1	1		N	FOR	Tribolium castaneum	Putative RNA-binding protein Luc7-like 2 OS=Homo sapiens GN=LUC7L2 PE=1 SV=2	4E-068	sp|Q9Y383|LC7L2_HUMAN	257	192	392	63	49	70	0	1	1	1	Homo sapiens
TI-162	162	A	54	0	TI-162	165			*	1	0	1	1	Unknown product	uk
TI-168	168	F	32	0	TI-168	99			*	3	1	2	2	Unknown product	uk
TI-170	170	G	96	0	TI-170	291			*	1	0	1	1	solute carrier organic anion transporter family member 5A1-like	tr	NR-LIGHT	1e-18	10.7	solute carrier organic anion transporter family member 5A1-like	1E-018	gi|328786599	94	76	717	49	11	39	0	639	3	1		N	FOR	Apis mellifera	Solute carrier organic anion transporter family member 5A1 OS=Homo sapiens	1E-004	sp|Q9H2Y9|SO5A1_HUMAN	45.1	45	848	36	5	29	0	704	2	1	Homo sapiens
TI-171	171	K	12	0	TI-171	39			*	1	0	1	1	Unknown product	uk
TI-172	172	M	68	0	TI-172	207		ATG	*	0	1	-1	1	intracellular protein transport - ovulation from ovarian follicle - oocyte growth - molting cycle collagen and cuticulin-based cuticle -	extmat	GO	1e-20	100	similar to Sec61p gamma subunit	8E-021	gi|156536879	101	67	68	73	100	18	0	1	1	1		N	FOR	Nasonia vitripennis	Protein transport protein Sec61 subunit gamma OS=Gryllotalpa orientalis	8E-022	sp|Q7Z1B8|S61G1_GRYOR	102	67	68	73	100	18	0	1	1	1	Gryllotalpa orientalis
TI-173	173	L	138	0	TI-173	417			*	0	1	-1	1	Oligomycin sensitivity-conferring protein - lipid particle - mitochondrial proton-transporting ATP synthase central stalk - proton transport -	tr	GO	2e-34	57.8	oligomycin sensitivity conferring protein precursor	4E-033	gi|1490236	142	120	209	55	58	54	0	15	18	1		N	FOR	Drosophila melanogaster	ATP synthase subunit O, mitochondrial OS=Drosophila melanogaster GN=Oscp PE=2	8E-034	sp|Q24439|ATPO_DROME	142	120	209	55	58	54	0	15	18	1	Drosophila melanogaster
TI-175	175	M	233	0	TI-175	702		ATG	*	0	2	-2	2	Unknown product	uk				conserved hypothetical protein	2E-005	gi|170057069	51.2	118	243	30	49	83	8	29	20	1		N	FOR	Culex quinquefasciatus
TI-178	178	P	156	0	TI-178	471			*	1	0	1	1	Unknown product	uk				LOW QUALITY PROTEIN: folliculin-interacting protein 2-like	3.4	gi|311262183	32.7	57	1044	35	6	38	1	409	55	1		N	FOR	Sus scrofa
TI-180	180	D	215	4.65116	TI-180	642	Y			1	0	1	1	hypothetical protein TcasGA2_TC000274	uc	NR-LIGHT	7e-64	66.8	hypothetical protein TcasGA2_TC000274	7E-064	gi|270001445	245	201	302	63	67	73	1	75	14	1		N	FOR	Tribolium castaneum	Glycine N-acyltransferase-like protein 3 OS=Homo sapiens GN=GLYATL3 PE=2 SV=3	7E-004	sp|Q5SZD4|GLYL3_HUMAN	43.9	87	288	30	31	61	1	176	124	1	Homo sapiens
TI-181	181	M	99	0	TI-181	300		ATG	*	1	0	1	1	mitochondrial NADH:ubiquinone oxidoreductase ESSS subunit	uc	NR-LIGHT	4e-22	69.2	similar to mitochondrial NADH:ubiquinone oxidoreductase ESSS subunit, putative	4E-022	gi|91090522	105	96	140	51	69	47	0	44	3	1		N	FOR	Tribolium castaneum
TI-182	182	M	169	0	TI-182	510		ATG	*	2	0	2	2	tubulin polymerization promoting protein	cs	NR-LIGHT	4e-82	100	tubulin polymerization promoting protein	4E-082	gi|307095196	305	165	166	91	100	14	0	1	4	1		N	FOR	Triatoma matogrossensis	TPPP family protein CG4893 OS=Drosophila melanogaster GN=CG4893 PE=2 SV=1	3E-051	sp|Q9VV43|Y4893_DROME	200	144	192	67	76	48	2	48	20	1	Drosophila melanogaster
TI-183	183	P	195	1.53846	TI-183	588			*	2	0	2	2	cathepsin D	pm	NR-LIGHT	1e-49	50.2	cathepsin D	1E-049	gi|301030231	197	195	390	47	50	102	2	192	1	1		N	FOR	Triatoma infestans	Lysosomal aspartic protease OS=Aedes aegypti GN=AAEL006169 PE=1 SV=2	6E-036	sp|Q03168|ASPP_AEDAE	150	192	387	41	50	115	5	191	1	1	Aedes aegypti
TI-184	184	I	147	0	TI-184	440				2	0	2	2	DnaJ (Hsp40) homolog subfamily A member 3 - unfolded protein binding - positive regulation of T cell proliferation - T cell differentiation in the	tf	GO	3e-07	14.7	J domain-containing protein C21orf55, putative	3E-032	gi|242018813	139	113	367	60	31	45	4	33	38	1		N	FOR	Pediculus humanus corporis	DnaJ homolog subfamily C member 28 OS=Homo sapiens GN=DNAJC28 PE=1 SV=2	2E-015	sp|Q9NX36|DJC28_HUMAN	80.9	106	388	38	28	70	6	45	35	1	Homo sapiens
TI-185	185	K	49	2.04082	TI-185	146				0	1	-1	1	Unknown product	uk
TI-186	186	F	19	0	TI-186	60			*	0	1	-1	1	Unknown product	uk
TI-187	187	M	174	0	TI-187	525		ATG	*	0	2	-2	2	myosin regulatory light chain 2 smooth muscle Aedes aegypti	cs	NR-LIGHT	1e-80	83.6	myosin regulatory light chain 2 smooth muscle	1E-080	gi|157120145	300	173	208	82	84	30	0	1	1	1		N	FOR	Aedes aegypti	Myosin regulatory light chain sqh OS=Drosophila melanogaster GN=sqh PE=1 SV=1	2E-078	sp|P40423|SQH_DROME	291	173	174	80	100	34	0	1	1	1	Drosophila melanogaster
TI-188	188	M	156	0	TI-188	467		ATG		1	0	1	1	ENSANGP00000031364	uc	NR-LIGHT	2e-15	21.9	similar to ENSANGP00000031364	2E-015	gi|156538801	83.6	56	260	70	22	17	0	1	1	1		N	FOR	Nasonia vitripennis	Upstream activation factor subunit spp27 OS=Schizosaccharomyces pombe (strain	0.006	sp|O74503|UAF30_SCHPO	40	50	233	37	22	32	0	2	7	1	Schizosaccharomyces pombe (strain ATCC 38366 / 972)
TI-189	189	M	76	0	TI-189	231		ATG	*	1	0	1	1	Unknown product	uk				hypothetical protein LOC100575189 isoform 1	1E-005	gi|328702895	50.8	56	334	46	17	32	3	5	8	1		N	FOR	Acyrthosiphon pisum
TI-190	190	M	180	11.1111	TI-190	543	Y	ATG	*	1	0	1	1	hemolysin-like secreted salivary protein 1	s/	NR-LIGHT	2e-67	69	hemolysin-like secreted salivary protein 1	2E-067	gi|149898852	256	171	249	79	69	35	0	1	1	1		N	FOR	Triatoma infestans
TI-193	193	M	13	0	TI-193	42		ATG	*	1	0	1	1	Unknown product	uk
TI-194	194	M	144	0	TI-194	431		ATG		0	1	-1	1	Hydroxysteroid dehydrogenase-like protein 2	met/lipd	SWISSP	2e-62	33.8	hypothetical protein DAPPUDRAFT_203975	2E-068	gi|321455574	259	143	418	82	34	25	0	1	1	1		N	FOR	Daphnia pulex	Hydroxysteroid dehydrogenase-like protein 2 OS=Xenopus tropicalis GN=hsdl2 PE=2	2E-062	sp|Q66KC4|HSDL2_XENTR	236	140	417	80	34	27	0	4	3	1	Xenopus tropicalis
TI-199	199	I	29	0	TI-199	90			*	0	1	-1	1	Unknown product	uk
TI-200	200	M	162	0	TI-200	489		ATG	*	4	0	4	4	selenoprotein S-like Acyrthosiphon pisum	detox/ox	NR-LIGHT	2e-08	78.6	hypothetical protein TcasGA2_TC002967	2E-010	gi|270003698	67	133	165	29	81	94	2	23	22	1		N	FOR	Tribolium castaneum
TI-203	203	C	61	0	TI-203	186			*	1	0	1	1	Unknown product	uk
TI-205	205	F	86	1.16279	TI-205	261			*	1	0	1	1	Unknown product	uk
TI-206	206	L	139	0	TI-206	420			*	0	1	-1	1	hemoglobin alpha adult chain 2 - regulation of sensory perception of pain - protein heterooligomerization - erythrocyte development - negative	ps	GO	1e-51	92.2	unnamed protein product	5E-066	gi|12846939	251	138	142	91	98	12	0	4	1	1		N	FOR	Mus musculus	Hemoglobin subunit alpha OS=Mus musculus GN=Hba PE=1 SV=2	7E-065	sp|P01942|HBA_MOUSE	245	130	142	95	92	6	0	12	9	1	Mus musculus
TI-207	207	M	83	0	TI-207	252		ATG	*	0	1	-1	1	40S ribosomal protein S21	ps	SWISSP	7e-35	98	similar to ribosomal protein S21e	1E-034	gi|91093173	147	82	83	81	100	15	0	1	1	1		N	FOR	Tribolium castaneum	40S ribosomal protein S21 OS=Spodoptera frugiperda GN=RpS21 PE=3 SV=1	7E-035	sp|Q962Q8|RS21_SPOFR	145	81	83	80	99	16	0	1	1	1	Spodoptera frugiperda
TI-209	209	G	66	0	TI-209	201			*	0	2	-2	2	Senescence-associated protein Brugia malayi	uc	NR-LIGHT	4e-26	50.4	Senescence-associated protein	4E-026	gi|170591136	119	60	121	90	50	6	0	1	1	1		N	FOR	Brugia malayi
TI-211	211	N	229	0	TI-211	686				1	0	1	1	cell division cycle 2-like 1 - apoptosis - regulation of mitosis - nucleus - blastocyst development	st/apoptosis	GO	5e-97	28.1	AGAP011055-PA	1E-103	gi|158285039	377	220	954	78	23	47	0	641	9	1		N	FOR	Anopheles gambiae str. PEST	Cyclin-dependent kinase 11B OS=Homo sapiens GN=CDK11B PE=1 SV=3	2E-096	sp|P21127|CD11B_HUMAN	352	217	795	73	27	58	3	519	9	1	Homo sapiens
TI-214	214	M	127	0	TI-214	384		ATG	*	3	2	1	1	fatbody protein 3Rev-G1 Bombyx mori	uc	NR-LIGHT	2e-14	85.5	putative fatbody protein 3Rev-G1	2E-014	gi|306518634	80.1	100	118	41	86	59	0	17	27	1		N	FOR	Bombyx mori
TI-215	215	M	69	33.3333	TI-215	210	Y	ATG	*	0	2	-2	2	Profilin	uc	SWISSP	1e-12	29.3	profilin	6E-012	gi|147902613	71.6	36	126	86	29	5	0	1	1	1		N	FOR	Apis mellifera	Profilin OS=Bombyx mori PE=2 SV=1	1E-012	sp|Q68HB4|PROF_BOMMO	71.6	36	126	83	29	6	0	1	1	1	Bombyx mori
TI-216	216	M	58	0	TI-216	177		ATG	*	0	2	-2	2	hypothetical protein	uc	NR-LIGHT	4e-26	100	hypothetical protein	4E-026	gi|111379887	119	57	58	96	100	2	0	1	1	1		N	FOR	Triatoma brasiliensis
TI-217	217	G	180	0	TI-217	538				0	3	-3	3	truncated histone H1	nr	NR-LIGHT	2e-39	39	truncated histone H1	2E-039	gi|149689210	163	76	197	98	39	1	0	40	29	1		N	FOR	Triatoma infestans	Histone H1 OS=Drosophila melanogaster GN=His1 PE=1 SV=1	3E-025	sp|P02255|H1_DROME	114	74	256	68	29	24	0	46	29	1	Drosophila melanogaster
TI-218	218	E	243	0	TI-218	728				2	1	1	1	polyprotein	vir/	NR-LIGHT	3e-47	8	polyprotein	3E-047	gi|297578409	190	232	2964	42	8	136	12	903	10	1		N	FOR	Slow bee paralysis virus
TI-219	219	K	69	0	TI-219	210			*	2	0	2	2	Pre-mRNA-splicing factor syf2	uc	SWISSP	3e-27	27.3	similar to GCIP-interacting protein p29 (P29)	6E-026	gi|118101581	118	67	252	82	27	12	0	185	2	1		N	FOR	Gallus gallus	Pre-mRNA-splicing factor syf2 OS=Gecko japonicus GN=syf2 PE=2 SV=1	3E-027	sp|Q6DV01|SYF2_GECJA	120	67	249	85	27	10	0	182	2	1	Gecko japonicus
TI-220	220	Y	150	0	TI-220	453			*	5	2	3	3	polyprotein Slow bee paralysis virus	vir/	NR-LIGHT	4e-21	3.8	polyprotein	4E-021	gi|296005647	102	114	2964	43	4	65	0	2849	9	1		N	FOR	Slow bee paralysis virus	Genome polyprotein OS=Rice tungro spherical virus (strain A) PE=1 SV=1	2E-006	sp|Q83034|POLG_RTSVA	51.6	82	3473	36	2	53	0	3318	26	1	Rice tungro spherical virus (strain A)
TI-223	223	F	40	0	TI-223	123			*	1	0	1	1	Unknown product	uk
TI-225	225	C	203	8.86699	TI-225	612			*	0	1	-1	1	glutamate NMDA receptor-associated protein 1 Bombyx mori	st	NR-LIGHT	8e-58	64.4	AGAP005529-PC	4E-058	gi|158294325	226	200	241	59	83	82	1	41	2	1		N	FOR	Anopheles gambiae str. PEST	Glutamate	4E-029	sp|Q7Z429|GRINA_HUMAN	127	170	371	40	46	103	1	201	31	1	Homo sapiens
TI-227	227	M	139	0	TI-227	420		ATG	*	1	0	1	1	Lysozyme X - antimicrobial humoral response - defense response - lysozyme	imm	GO	1e-20	100	lysozyme 2	2E-063	gi|115338587	243	125	139	92	91	10	0	14	14	1		N	FOR	Triatoma infestans	Lysozyme c-1 OS=Anopheles gambiae GN=AGAP007347 PE=2 SV=2	1E-027	sp|Q17005|LYSC1_ANOGA	121	135	140	40	97	81	1	5	3	1	Anopheles gambiae
TI-228	228	L	18	5.55556	TI-228	57			*	1	0	1	1	Unknown product	uk
TI-230	230	M	200	0	TI-230	599		ATG		2	0	2	2	Kazal-type inhibitor	s/protinh	NR-LIGHT	2e-81	49.7	infestin 1-7 precursor	1E-111	gi|83637828	404	405	409	98	99	3	0	1	1	4		N	FOR	Triatoma infestans	Serine protease inhibitor dipetalogastin (Fragment) OS=Dipetalogaster maximus	2E-052	sp|O96790|DPGN_DIPMA	205	344	351	60	98	71	5	7	23	3	Dipetalogaster maximus
TI-231	231	M	143	0	TI-231	432		ATG	*	1	6	-5	5	hypothetical protein	uc	NR-LIGHT	1e-60	91.7	hypothetical protein	1E-060	gi|149898792	233	122	134	92	92	9	0	1	1	1		N	FOR	Triatoma infestans
TI-232	232	F	24	0	TI-232	75			*	1	0	1	1	Unknown product	uk
TI-233	233	P	55	0	TI-233	168			*	1	0	1	1	Unknown product	uk
TI-234	234	M	155	0	TI-234	463		ATG		1	0	1	1	eukaryotic translation initiation factor 3 subunit Pediculus humanus corporis	ps	NR-LIGHT	2e-54	61	eukaryotic translation initiation factor 3 subunit, putative	2E-054	gi|242021197	213	209	344	51	61	102	55	2	1	1		N	FOR	Pediculus humanus corporis	Eukaryotic translation initiation factor 3 subunit H OS=Bombyx mori PE=2 SV=1	1E-053	sp|Q9GV27|EIF3H_BOMMO	208	208	337	52	62	100	55	9	2	1	Bombyx mori
TI-239	239	I	42	0	TI-239	129			*	3	0	3	3	Unknown product	uk
TI-240	240	N	44	0	TI-240	135			*	2	0	2	2	Unknown product	uk
TI-241	241	C	263	0	TI-241	792			*	2	0	2	2	hypothetical protein AaeL_AAEL012646 Aedes aegypti	uc	NR-LIGHT	1e-11	83.7	hypothetical protein AaeL_AAEL012646	1E-011	gi|157133150	72.8	218	277	32	79	156	25	37	30	1		N	FOR	Aedes aegypti
TI-242	242	S	167	0	TI-242	499				0	2	-2	2	inorganic phosphate cotransporter-like isoform 1	tr	NR-LIGHT	2e-33	17.9	putative inorganic phosphate cotransporter-like isoform 1	2E-033	gi|328709271	143	110	617	60	18	44	1	117	47	1		N	FOR	Acyrthosiphon pisum	Putative inorganic phosphate cotransporter OS=Drosophila melanogaster GN=Picot	2E-024	sp|Q9V7S5|PICO_DROME	111	93	529	56	18	43	6	37	59	1	Drosophila melanogaster
TI-243	243	Y	82	0	TI-243	244				1	0	1	1	Unknown product	uk				similar to chondroitin sulfate proteoglycan 3, partial	2.7	gi|198415233	33.1	48	1487	34	3	36	6	1269	17	1		N	FOR	Ciona intestinalis
TI-248	248	L	42	0	TI-248	129			*	0	1	-1	1	Unknown product	uk
TI-249	249	M	162	0	TI-249	489		ATG	*	0	1	-1	1	PPPDE peptidase domain-containing protein 1-like isoform 1 Apis mellifera	pm/protease	NR-LIGHT	2e-53	73.7	PPPDE peptidase domain-containing protein 1-like isoform 1	2E-053	gi|328786383	209	149	206	68	73	48	4	2	1	1		N	FOR	Apis mellifera	PPPDE peptidase domain-containing protein 1 OS=Danio rerio GN=pppde1 PE=2 SV=1	3E-046	sp|Q6DC39|PPDE1_DANRE	184	121	196	64	62	43	0	1	29	1	Danio rerio
TI-250	250	S	155	0	TI-250	468			*	0	1	-1	1	40S ribosomal protein S14 Pediculus humanus corporis	ps	NR-LIGHT	3e-57	78.2	40S ribosomal protein S14, putative	3E-057	gi|242012371	222	139	179	79	78	29	0	1	5	1		N	FOR	Pediculus humanus corporis	40S ribosomal protein S14 OS=Drosophila melanogaster GN=RpS14a PE=1 SV=1	2E-055	sp|P14130|RS14_DROME	214	139	151	75	93	34	0	1	5	1	Drosophila melanogaster
TI-254	254	M	72	0	TI-254	219		ATG	*	1	0	1	1	mitochondrial import inner membrane translocase subunit Tim9 B Pediculus humanus corporis	tr	NR-LIGHT	3e-11	54.1	hypothetical protein DAPPUDRAFT_52086	3E-012	gi|321468906	72.8	65	116	42	57	38	0	6	3	1		N	FOR	Daphnia pulex	Mitochondrial import inner membrane translocase subunit Tim9 B OS=Danio rerio	4E-010	sp|Q568N4|TIM9B_DANRE	63.5	62	202	42	31	36	0	16	3	1	Danio rerio
TI-256	256	S	236	0	TI-256	711			*	0	1	-1	1	Serine protease inhibitor dipetalogastin (Fragment)	s/protinh	SWISSP	2e-91	62.3	infestin 1-7 precursor	1E-125	gi|83637828	449	398	409	96	98	9	0	11	9	5		N	FOR	Triatoma infestans	Serine protease inhibitor dipetalogastin (Fragment) OS=Dipetalogaster maximus	2E-091	sp|O96790|DPGN_DIPMA	335	337	351	73	96	58	0	12	2	7	Dipetalogaster maximus
TI-259	259	M	99	0	TI-259	300		ATG	*	0	1	-1	1	RE17222p	uc	NR-LIGHT	8e-20	75.6	similar to RE17222p	8E-020	gi|156543290	97.8	86	115	48	76	45	0	1	1	1		N	FOR	Nasonia vitripennis
TI-260	260	G	57	5.26316	TI-260	170			*	1	0	1	1	Unknown product	uk				variola B22R gene family protein	2.2	gi|9634768	33.5	29	1802	43	2	17	0	927	19	1		N	FOR	Fowlpox virus
TI-261	261	L	17	0	TI-261	54			*	0	4	-4	4	Unknown product	uk
TI-262	262	M	167	0	TI-262	498		ATG		3	1	2	2	Unknown product	uk				hypothetical protein	0.16	gi|256070610	37.4	98	727	30	14	70	10	619	23	1		N	FOR	Schistosoma mansoni
TI-263	263	E	35	0	TI-263	108			*	1	1	0	0	Unknown product	uk
TI-264	264	M	161	0	TI-264	480		ATG		1	1	0	0	Unknown product	uk				conserved hypothetical protein	3E-005	gi|170028035	50.1	78	626	32	13	53	4	16	87	1		N	FOR	Culex quinquefasciatus
TI-265	265	R	206	0	TI-265	621			*	1	12	-11	11	predicted RNA-binding protein	uc	NR-LIGHT	1e-31	44.3	predicted RNA-binding protein	1E-031	gi|149898790	138	132	300	57	44	56	0	140	1	1		N	FOR	Triatoma infestans
TI-267	267	G	51	0	TI-267	156			*	1	0	1	1	Unknown product	uk
TI-268	268	M	131	0	TI-268	391		ATG		1	0	1	1	truncated histone H1	nr	NR-LIGHT	4e-34	37	truncated histone H1	4E-034	gi|149689210	145	72	197	94	37	4	0	39	40	1		N	FOR	Triatoma infestans	Histone H1 OS=Drosophila melanogaster GN=His1 PE=1 SV=1	1E-025	sp|P02255|H1_DROME	114	72	256	67	29	24	0	45	40	1	Drosophila melanogaster
TI-271	271	M	139	0	TI-271	415		ATG		1	0	1	1	40S ribosomal protein S4	ps	SWISSP	8e-72	53.2	similar to ribosomal protein S4e	2E-071	gi|91083095	269	138	261	91	53	12	0	1	1	1		N	FOR	Tribolium castaneum	40S ribosomal protein S4 OS=Carabus granulatus GN=RpS4 PE=2 SV=1	8E-072	sp|Q4GXU6|RS4_CARGR	268	138	261	90	53	13	0	1	1	1	Carabus granulatus
TI-272	272	K	151	0	TI-272	456			*	0	2	-2	2	Unknown product	uk				hypothetical protein	5.4	gi|72082777	32	47	290	30	17	34	4	205	94	1		N	FOR	Strongylocentrotus purpuratus
TI-276	276	A	15	0	TI-276	48			*	0	5	-5	5	Unknown product	uk
TI-277	277	D	61	0	TI-277	186			*	1	0	1	1	Unknown product	uk
TI-278	278	T	188	0	TI-278	562				1	0	1	1	UDP-glucose:glycoprotein glucosyltransferase	met/carb	NR-LIGHT	1e-35	8.9	UDP-glucose:glycoprotein glucosyltransferase	1E-035	gi|328786702	150	173	1975	45	9	96	11	93	3	1		N	FOR	Apis mellifera	UDP-glucose:glycoprotein glucosyltransferase 2 OS=Homo sapiens GN=UGGT2 PE=1	1E-024	sp|Q9NYU1|UGGG2_HUMAN	112	171	1516	38	11	106	4	102	4	1	Homo sapiens
TI-279	279	D	17	0	TI-279	54			*	1	0	1	1	Unknown product	uk
TI-283	283	C	232	0	TI-283	699			*	0	3	-3	3	Unknown product	uk				DNA primase	0.49	gi|322376486	37	76	567	28	14	55	1	160	99	1		N	FOR	Streptococcus sp. M334
TI-284	284	L	85	0	TI-284	258			*	1	0	1	1	Unknown product	uk				E3 ubiquitin-protein ligase RNF14	4.0	gi|125630705	32.3	38	474	33	8	26	0	120	33	1		N	FOR	Bos taurus
TI-287	287	F	48	0	TI-287	147			*	0	2	-2	2	Unknown product	uk
TI-288	288	P	210	0	TI-288	633			*	1	1	0	0	Unknown product	uk				hypothetical protein C41A3.1	0.43	gi|17550940	37	78	7829	31	1	56	4	4592	83	1		N	FOR	Caenorhabditis elegans
TI-289	289	G	43	0	TI-289	132			*	1	5	-4	4	Unknown product	uk
TI-290	290	I	163	0	TI-290	491			*	2	0	2	2	Golgi SNAP receptor complex member 1 isoform 2	st	NR-LIGHT	9e-30	66.9	hypothetical protein DAPPUDRAFT_238099	4E-030	gi|321474467	132	150	237	50	64	78	11	7	12	1		N	FOR	Daphnia pulex	Golgi SNAP receptor complex member 1 OS=Pongo abelii GN=GOSR1 PE=2 SV=1	1E-029	sp|Q5RBL6|GOSR1_PONAB	129	163	248	46	66	88	13	5	9	1	Pongo abelii
TI-291	291	Q	172	2.32558	TI-291	519			*	0	1	-1	1	ENSANGP00000001286	uc	NR-LIGHT	7e-59	21.3	similar to ENSANGP00000001286	7E-059	gi|156554871	228	168	790	69	21	51	0	430	3	1		N	FOR	Nasonia vitripennis	TBC1 domain family member CG11727 OS=Drosophila melanogaster GN=CG11727 PE=1	2E-044	sp|Q9VYY9|Y1727_DROME	177	174	807	54	22	79	6	406	3	1	Drosophila melanogaster
TI-292	292	P	201	0	TI-292	606			*	0	1	-1	1	vacuolar protein sorting-associated protein 28 homolog	pe	NR-LIGHT	2e-89	93.4	vacuolar protein sorting-associated protein 28 homolog	2E-089	gi|66506589	330	198	213	77	93	44	0	15	3	1		N	FOR	Apis mellifera	Vacuolar protein sorting-associated protein 28 homolog OS=Mus musculus GN=Vps28	1E-081	sp|Q9D1C8|VPS28_MOUSE	301	195	221	71	89	56	0	25	3	1	Mus musculus
TI-293	293	R	166	0	TI-293	501			*	0	1	-1	1	Unknown product	uk
TI-294	294	F	18	0	TI-294	54				0	1	-1	1	Unknown product	uk
TI-295	295	P	174	0	TI-295	525			*	3	0	3	3	CG5112 - lipid particle - fatty acid amide hydrolase	met/lipd	GO	1e-38	32.8	amidotransferase subunit A, putative	2E-046	gi|242007160	187	170	520	51	33	83	1	348	2	1		N	FOR	Pediculus humanus corporis	Fatty-acid amide hydrolase 2 OS=Homo sapiens GN=FAAH2 PE=2 SV=1	3E-036	sp|Q6GMR7|FAAH2_HUMAN	150	176	532	48	33	92	8	353	3	1	Homo sapiens
TI-298	298	L	241	0	TI-298	726			*	1	0	1	1	AGAP005091-PB	uc	NR-LIGHT	2e-63	40.4	similar to AGAP005091-PB	2E-063	gi|189234389	244	232	581	56	40	103	8	264	5	1		N	FOR	Tribolium castaneum	Protein GDAP2 homolog OS=Drosophila pseudoobscura pseudoobscura GN=GA15091 PE=3	2E-053	sp|Q292F9|GDAP2_DROPS	209	210	542	52	39	100	4	327	29	1	Drosophila pseudoobscura pseudoobscura
TI-300	300	P	209	3.82775	TI-300	625				0	1	-1	1	rhomboid	imm	NR-LIGHT	1e-69	14.1	hypothetical protein TcasGA2_TC006551	1E-069	gi|270012402	264	209	1455	60	14	84	1	1193	1	1		N	FOR	Tribolium castaneum	Inactive rhomboid protein 1 OS=Danio rerio GN=rhbdf1 PE=2 SV=1	1E-050	sp|Q6GMF8|RHDF1_DANRE	199	211	857	46	25	114	6	600	1	1	Danio rerio
TI-302	302	M	67	0	TI-302	204		ATG	*	0	1	-1	1	mitochondrial ribosomal protein L33 - mitochondrion - mitochondrial large ribosomal subunit - structural constituent of ribosome - translation	ps	GO	6e-20	100	mitochondrial ribosomal protein, L33	1E-019	gi|170044531	97.1	63	65	67	98	21	1	1	1	1		N	FOR	Culex quinquefasciatus	39S ribosomal protein L33, mitochondrial OS=Drosophila melanogaster GN=mRpL33	3E-019	sp|Q9W4L1|RM33_DROME	93.6	62	64	70	98	19	1	1	1	1	Drosophila melanogaster
TI-303	303	V	21	0	TI-303	66			*	0	1	-1	1	Unknown product	uk
TI-304	304	F	77	0	TI-304	234			*	0	1	-1	1	60S ribosomal protein L26	ps	NR-LIGHT	3e-26	40.2	60S ribosomal protein L26	3E-026	gi|149689146	119	59	149	95	40	3	0	6	18	1		N	FOR	Triatoma infestans	60S ribosomal protein L26 OS=Rattus norvegicus GN=Rpl26 PE=1 SV=1	5E-023	sp|P12749|RL26_RAT	106	59	145	80	41	12	0	6	18	1	Rattus norvegicus
TI-308	308	Y	242	0	TI-308	724			*	0	1	-1	1	Unknown product	uk				1-phosphatidylinositol-4-phosphate 5-kinase	0.13	gi|22329482	39.3	58	754	40	8	35	9	512	93	1		N	FOR	Arabidopsis thaliana
TI-309	309	X	28	89.2857	TI-309	74	Y			0	1	-1	1	Unknown product	uk
TI-310	310	C	153	0	TI-310	462			*	0	1	-1	1	Unknown product	uk				similar to phenylalanine hydroxylase	0.54	gi|198437597	35.4	80	451	27	18	67	18	68	15	1		N	FOR	Ciona intestinalis
TI-311	311	M	155	0	TI-311	463		ATG		1	0	1	1	Cyclophilin 1 - salivary gland cell autophagic cell death - autophagic cell death - positive transcription elongation factor complex b - nuclear	st/apoptosis	GO	3e-71	67.8	cyclophilin-like protein	2E-072	gi|157361501	273	153	165	84	93	24	1	1	1	1		N	FOR	Phlebotomus papatasi	Peptidyl-prolyl cis-trans isomerase OS=Blattella germanica GN=CYPA PE=2 SV=1	3E-073	sp|P54985|PPIA_BLAGE	273	153	164	84	94	24	1	1	1	1	Blattella germanica
TI-312	312	S	60	0	TI-312	183			*	1	0	1	1	Cytochrome c oxidase subunit 2	met/energy	SWISSP	6e-08	26.6	cytochrome c oxidase subunit II	3E-007	gi|49619215	56.2	59	224	50	27	30	0	5	1	1		N	FOR	Amblyomma triguttatum	Cytochrome c oxidase subunit 2 OS=Rhipicephalus sanguineus GN=COII PE=3 SV=1	6E-008	sp|O99819|COX2_RHISA	55.8	59	225	48	27	31	0	5	1	1	Rhipicephalus sanguineus
TI-314	314	M	195	0	TI-314	584		ATG		1	0	1	1	tetraspanin 6 Apis mellifera	st	NR-LIGHT	2e-24	80	CD63 antigen-like isoform 2	2E-029	gi|328704941	130	138	239	46	58	75	5	66	62	1		N	FOR	Acyrthosiphon pisum	CD63 antigen OS=Felis catus GN=CD63 PE=2 SV=3	1E-018	sp|Q76B49|CD63_FELCA	92.8	192	238	31	81	138	23	10	8	1	Felis catus
TI-315	315	M	114	0	TI-315	340		ATG		0	1	-1	1	tubulin alpha 3A - microtubule basal body - cilium - microtubule	cs	GO	5e-65	25.3	similar to tubulin, alpha 2 isoform 2 isoform 2	8E-064	gi|73995895	244	113	418	99	27	1	0	1	1	1		N	FOR	Canis familiaris	Tubulin alpha-3 chain OS=Bos taurus GN=TUBA3 PE=2 SV=1	2E-064	sp|Q32KN8|TBA3_BOVIN	243	113	450	99	25	1	0	1	1	1	Bos taurus
TI-316	316	L	68	0	TI-316	203				1	0	1	1	NADH dehydrogenase subunit 4 Triatoma dimidiata	uc	NR-LIGHT	2e-13	15.3	NADH dehydrogenase subunit 4	2E-013	gi|11182470	76.6	67	443	58	15	28	0	201	1	1		N	FOR	Triatoma dimidiata	NADH-ubiquinone oxidoreductase chain 4 OS=Rhipicephalus sanguineus GN=ND4 PE=3	8E-007	sp|O99825|NU4M_RHISA	52.4	67	433	41	16	40	0	193	1	1	Rhipicephalus sanguineus
TI-317	317	F	136	0	TI-317	411			*	1	0	1	1	NADH dehydrogenase subunit 5 Triatoma dimidiata	uc	NR-LIGHT	7e-46	22.6	NADH dehydrogenase subunit 5	7E-046	gi|11182469	184	128	570	74	23	33	0	32	8	1		N	FOR	Triatoma dimidiata	NADH-ubiquinone oxidoreductase chain 5 OS=Aedes aegypti GN=mt:ND5 PE=3 SV=1	4E-038	sp|B0FWD3|NU5M_AEDAE	156	127	580	60	22	51	0	33	9	1	Aedes aegypti
TI-318	318	I	136	0	TI-318	411			*	1	0	1	1	Lysozyme P - antimicrobial humoral response - lysozyme	imm	GO	5e-25	101.4	lysozyme	1E-069	gi|32454476	263	125	139	99	91	1	0	14	11	1		N	FOR	Triatoma infestans	Lysozyme c-1 OS=Anopheles gambiae GN=AGAP007347 PE=2 SV=2	4E-033	sp|Q17005|LYSC1_ANOGA	139	133	140	47	96	71	1	7	2	1	Anopheles gambiae
TI-320	320	Y	238	0	TI-320	717			*	0	1	-1	1	tubulin beta-1 chain Apis mellifera	cs	NR-LIGHT	0	53	tubulin beta-1 chain	1E-137	gi|48095525	488	236	447	96	53	8	0	208	1	1		N	FOR	Acromyrmex echinatior	Tubulin beta-1 chain OS=Manduca sexta PE=2 SV=1	1E-135	sp|O17449|TBB1_MANSE	479	226	447	99	51	2	0	208	1	1	Manduca sexta
TI-321	321	C	56	0	TI-321	171			*	1	0	1	1	Unknown product	uk
TI-322	322	P	30	0	TI-322	93			*	1	0	1	1	Unknown product	uk
TI-323	323	K	77	0	TI-323	234			*	1	0	1	1	bladder cancer-associated protein-like	uc	NR-LIGHT	1e-29	95	bladder cancer-associated protein-like	1E-029	gi|328786409	130	75	80	77	95	17	0	5	2	1		N	FOR	Apis mellifera	Bladder cancer-associated protein OS=Rattus norvegicus GN=Blcap PE=2 SV=1	2E-016	sp|P62950|BLCAP_RAT	84.3	68	87	55	79	34	7	5	2	1	Rattus norvegicus
TI-324	324	M	247	0	TI-324	744		ATG	*	3	0	3	3	multifunctional chaperone	pm	NR-LIGHT	0	93.9	multifunctional chaperone	1E-130	gi|263173438	468	231	247	98	94	4	0	1	1	1		N	FOR	Cimex lectularius	14-3-3 protein zeta OS=Bombyx mori GN=14-3-3zeta PE=2 SV=2	1E-124	sp|Q2F637|1433Z_BOMMO	444	231	247	92	94	17	0	1	1	1	Bombyx mori
TI-326	326	P	130	0	TI-326	393			*	0	1	-1	1	elongation factor 1-alpha	ps	NR-LIGHT	6e-70	28.1	putative elongation factor 1-alpha	6E-070	gi|307095102	264	129	462	98	28	2	0	333	1	1		N	FOR	Triatoma matogrossensis	Elongation factor 1-alpha 1 OS=Drosophila melanogaster GN=Ef1alpha48D PE=1 SV=2	5E-062	sp|P08736|EF1A1_DROME	235	129	463	86	28	18	0	333	1	1	Drosophila melanogaster
TI-327	327	G	30	0	TI-327	93			*	1	0	1	1	Unknown product	uk
TI-328	328	V	115	5.21739	TI-328	348			*	1	0	1	1	Unknown product	uk
TI-330	330	F	54	0	TI-330	159				1	0	1	1	Unknown product	uk
TI-331	331	K	48	0	TI-331	69				0	1	-1	1	Unknown product	uk
TI-332	332	C	157	0	TI-332	474			*	1	0	1	1	effete - protein ubiquitination - compound eye photoreceptor cell differentiation - regulation of R7 cell differentiation - oogenesis - compound eye	st	GO	4e-79	97.9	effete	5E-078	gi|24646906	291	143	147	97	98	3	0	4	14	1		N	FOR	Glossina morsitans morsitans	Ubiquitin-conjugating enzyme E2-17 kDa OS=Drosophila melanogaster GN=eff PE=1	1E-078	sp|P25867|UBCD1_DROME	291	143	147	97	98	3	0	4	14	1	Drosophila melanogaster
TI-334	334	W	106	0	TI-334	321			*	1	0	1	1	Unknown product	uk				Lian-Aa1 retrotransposon protein	3E-005	gi|2290213	49.3	80	1189	32	7	55	0	1107	14	1		N	FOR	Aedes aegypti
TI-335	335	V	128	0	TI-335	387			*	1	0	1	1	lipase	met/lipd	NR-LIGHT	2e-20	33.5	hypothetical protein TcasGA2_TC000236	3E-021	gi|270001417	102	107	304	46	36	59	4	197	9	1		N	FOR	Tribolium castaneum	Lipase member H OS=Xenopus tropicalis GN=liph PE=2 SV=1	4E-010	sp|Q5XGE9|LIPH_XENTR	63.5	82	460	39	18	51	6	210	9	1	Xenopus tropicalis
TI-336	336	L	42	0	TI-336	125				0	1	-1	1	ribosomal protein L5	ps	NR-LIGHT	1e-17	14.5	ribosomal protein L5	1E-017	gi|307095210	90.5	41	288	100	15	0	0	150	1	1		N	FOR	Triatoma matogrossensis	60S ribosomal protein L5 OS=Toxoptera citricida GN=RpL5 PE=2 SV=1	4E-015	sp|Q5XUC7|RL5_TOXCI	80.1	41	300	83	14	7	0	150	1	1	Toxoptera citricida
TI-338	338	L	184	2.17391	TI-338	555			*	1	0	1	1	Nuclear hormone receptor FTZ-F1 Pediculus humanus corporis	st	NR-LIGHT	9e-71	44.8	Nuclear hormone receptor FTZ-F1, putative	9E-071	gi|242019865	268	181	406	71	45	51	0	225	3	1		N	FOR	Pediculus humanus corporis	Nuclear hormone receptor FTZ-F1 OS=Bombyx mori GN=FTZ-F1 PE=1 SV=2	6E-064	sp|P49867|FTZF1_BOMMO	243	181	534	63	34	67	0	352	3	1	Bombyx mori
TI-339	339	M	208	0	TI-339	622		ATG		0	1	-1	1	truncated histone H1	nr	NR-LIGHT	5e-45	59	truncated histone H1	5E-045	gi|149689210	182	117	197	83	60	19	0	1	1	1		N	FOR	Triatoma infestans	Histone H1 OS=Drosophila melanogaster GN=His1 PE=1 SV=1	6E-026	sp|P02255|H1_DROME	117	75	256	68	30	24	0	45	39	1	Drosophila melanogaster
TI-344	344	Y	75	0	TI-344	228			*	1	0	1	1	Unknown product	uk				hypothetical protein	2.6	gi|156097410	33.1	32	1238	36	3	21	0	959	26	1		N	FOR	Plasmodium vivax
TI-346	346	F	38	7.89474	TI-346	117			*	0	2	-2	2	Unknown product	uk
TI-347	347	I	36	0	TI-347	111			*	1	0	1	1	Unknown product	uk
TI-348	348	K	30	0	TI-348	93			*	0	1	-1	1	Unknown product	uk
TI-349	349	G	29	0	TI-349	90			*	0	1	-1	1	Unknown product	uk
TI-350	350	V	119	0	TI-350	360			*	0	1	-1	1	Heat shock 70 kDa protein cognate 4	pm	SWISSP	3e-31	11.9	heat shock protein cognate 4	5E-031	gi|229892210	134	76	650	77	12	17	0	536	2	1		N	FOR	Apis mellifera	Heat shock 70 kDa protein cognate 4 OS=Manduca sexta PE=2 SV=1	3E-031	sp|Q9U639|HSP7D_MANSE	133	77	652	79	12	16	0	535	1	1	Manduca sexta
TI-353	353	K	44	0	TI-353	135			*	1	0	1	1	Unknown product	uk
TI-354	354	V	130	0	TI-354	389				0	1	-1	1	malectin - carbohydrate binding - endoplasmic reticulum	met/carb	GO	4e-30	33.3	conserved hypothetical protein	2E-044	gi|242013531	179	100	271	84	37	16	0	28	30	1		N	FOR	Pediculus humanus corporis	Malectin OS=Rattus norvegicus GN=Mlec PE=2 SV=1	2E-029	sp|Q5FVQ4|MLEC_RAT	127	96	291	58	33	40	0	47	34	1	Rattus norvegicus
TI-357	357	M	51	0	TI-357	156		ATG	*	1	0	1	1	Unknown product	uk
TI-358	358	M	177	0	TI-358	528		ATG		1	0	1	1	Ras-related small GTPase	uc	NR-LIGHT	5e-95	76.6	Ras-related small GTPase	5E-095	gi|149898836	348	166	218	99	77	1	0	1	11	1		N	FOR	Triatoma infestans	Ras-related protein Rab-21 OS=Canis familiaris GN=RAB21 PE=3 SV=3	4E-074	sp|P55745|RAB21_CANFA	276	154	223	81	70	28	0	16	23	1	Canis familiaris
TI-360	360	M	124	0	TI-360	375		ATG	*	2	0	2	2	lola like - protein binding - chromatin silencing - nucleus - specific RNA polymerase II transcription factor - regulation of transcription from RNA	tm	GO	2e-53	92.9	similar to CG5738-PA	5E-056	gi|156550568	218	117	127	86	93	16	0	1	1	1		N	FOR	Acromyrmex echinatior	Longitudinals lacking protein-like OS=Drosophila melanogaster GN=lolal PE=1 SV=1	8E-053	sp|Q7KRI2|LOLAL_DROME	205	117	127	81	93	22	0	1	1	1	Drosophila melanogaster
TI-361	361	T	103	0	TI-361	312			*	1	4	-3	3	Unknown product	uk				AGAP000109-PA	1E-006	gi|333467316	54.3	60	90	40	68	36	0	24	41	1		N	FOR	Anopheles gambiae str. PEST	Cytochrome c oxidase subunit 7A1, mitochondrial OS=Saimiri sciureus GN=COX7A1	1E-004	sp|Q53CF6|CX7A1_SAISC	44.7	52	80	36	66	38	7	14	33	1	Saimiri sciureus
TI-367	367	R	167	0	TI-367	504			*	1	0	1	1	Amphoterin-induced protein 2 precursor Pediculus humanus corporis	uc	NR-LIGHT	7e-15	17.5	Amphoterin-induced protein 2 precursor, putative	7E-015	gi|242008917	82	111	648	48	17	59	28	508	22	1		N	FOR	Pediculus humanus corporis
TI-369	369	F	16	0	TI-369	51			*	1	0	1	1	Unknown product	uk
TI-370	370	S	206	2.42719	TI-370	616				0	1	-1	1	capsid protein precursor Triatoma virus	vir/	NR-LIGHT	0	22.2	capsid protein precursor	1E-103	gi|20451030	377	192	868	95	22	8	0	15	1	1		N	FOR	Triatoma virus	Structural polyprotein OS=Cricket paralysis virus (isolate Teleogryllus	5E-021	sp|P13418|POLS_CRPVC	100	131	895	38	15	82	2	60	62	1	Cricket paralysis virus (isolate Teleogryllus commodus/Australia/CrPVVIC/1968)
TI-372	372	M	50	0	TI-372	153		ATG	*	0	1	-1	1	Unknown product	uk
TI-376	376	S	23	0	TI-376	72			*	0	1	-1	1	Unknown product	uk
TI-379	379	M	31	0	TI-379	96		ATG	*	1	0	1	1	Unknown product	uk
TI-380	380	Q	37	0	TI-380	114			*	1	0	1	1	Unknown product	uk
TI-382	382	M	90	0	TI-382	273		ATG	*	2	0	2	2	CG9413 - amino acid transport - amino acid transmembrane transporter	tr	GO	3e-20	16.2	hypothetical protein TcasGA2_TC000583	2E-022	gi|270001710	106	89	533	54	17	41	0	444	1	1		N	FOR	Tribolium castaneum	B(0,+)-type amino acid transporter 1 OS=Homo sapiens GN=SLC7A9 PE=1 SV=1	8E-011	sp|P82251|BAT1_HUMAN	65.9	85	487	43	18	49	2	396	1	1	Homo sapiens
TI-384	384	M	208	0	TI-384	625		ATG	*	0	1	-1	1	catalase Aedes aegypti	detox/ox	NR-LIGHT	1e-95	41.1	catalase	1E-095	gi|157135803	351	207	505	78	41	45	0	1	1	1		N	FOR	Aedes aegypti	Catalase OS=Drosophila melanogaster GN=Cat PE=1 SV=2	2E-091	sp|P17336|CATA_DROME	335	206	506	74	41	53	1	4	3	1	Drosophila melanogaster
TI-386	386	R	157	0	TI-386	469			*	0	1	-1	1	polyprotein Slow bee paralysis virus	vir/	NR-LIGHT	7e-32	4.4	polyprotein	7E-032	gi|296005647	138	128	2964	47	4	69	3	2397	26	1		N	FOR	Slow bee paralysis virus	Genome polyprotein OS=Rice tungro spherical virus (strain A) PE=1 SV=1	2E-004	sp|Q83034|POLG_RTSVA	45.1	144	3473	31	4	100	18	2830	27	1	Rice tungro spherical virus (strain A)
TI-387	387	K	15	0	TI-387	44				2	0	2	2	Unknown product	uk
TI-388	388	M	92	0	TI-388	279		ATG	*	1	0	1	1	60S ribosomal protein L37	ps	NR-LIGHT	3e-45	100	60S ribosomal protein L37	3E-045	gi|149689118	182	91	92	98	100	1	0	1	1	1		N	FOR	Triatoma infestans	60S ribosomal protein L37a OS=Drosophila melanogaster GN=RpL37A PE=1 SV=3	1E-037	sp|Q9VMU4|RL37A_DROME	154	90	92	84	99	14	0	1	1	1	Drosophila melanogaster
TI-389	389	V	12	0	TI-389	39			*	1	0	1	1	Unknown product	uk
TI-391	391	S	115	0	TI-391	343				0	1	-1	1	Unknown product	uk				hypothetical protein	3.1	gi|256081126	32.7	49	750	32	7	35	2	234	56	1		N	FOR	Schistosoma mansoni
TI-396	396	H	125	0	TI-396	378			*	1	0	1	1	Unknown product	uk				kininogen 1, isoform CRA_b	5E-004	gi|119598586	45.4	68	644	33	11	46	6	262	37	1		N	FOR	Homo sapiens	Kininogen-1 OS=Homo sapiens GN=KNG1 PE=1 SV=2	1E-004	sp|P01042|KNG1_HUMAN	45.4	68	644	33	11	46	6	262	37	1	Homo sapiens
TI-398	398	S	25	0	TI-398	78			*	1	1	0	0	Unknown product	uk
TI-401	401	N	98	2.04082	TI-401	292				1	0	1	1	Unknown product	uk				hypothetical protein TcasGA2_TC012685	0.67	gi|270013992	35	17	277	83	6	3	0	84	16	1		N	FOR	Tribolium castaneum
TI-403	403	M	81	0	TI-403	246		ATG	*	0	2	-2	2	Unknown product	uk
TI-404	404	M	212	2.35849	TI-404	635		ATG		0	1	-1	1	cathepsin D	pm	NR-LIGHT	0	54.3	cathepsin D	1E-114	gi|301030231	414	211	390	93	54	13	0	1	1	1		N	FOR	Triatoma infestans	Probable vacuolar protease A OS=Trichophyton verrucosum (strain HKI 0517)	2E-042	sp|D4DEN7|CARP_TRIVH	172	156	400	50	39	77	1	72	57	1	Trichophyton verrucosum (strain HKI 0517)
TI-405	405	L	163	0	TI-405	492			*	1	0	1	1	oo18 RNA-binding protein - positive regulation of oskar mRNA translation - protein binding - germ cell development - oocyte axis specification -	ps	GO	1e-58	16.6	Cytoplasmic polyadenylation element-binding protein, putative	8E-060	gi|242019529	231	145	375	71	39	42	0	217	13	1		N	FOR	Pediculus humanus corporis	Cytoplasmic polyadenylation element-binding protein 1-A OS=Xenopus laevis	2E-057	sp|Q91572|CPE1A_XENLA	221	141	568	69	25	43	0	425	12	1	Xenopus laevis
TI-406	406	F	20	0	TI-406	63			*	1	0	1	1	Unknown product	uk
TI-407	407	S	53	0	TI-407	162			*	1	0	1	1	Aquaporin AQPcic Pediculus humanus corporis	tr	NR-LIGHT	2e-12	19.7	Aquaporin AQPcic, putative	2E-012	gi|242018018	73.6	51	263	65	20	18	0	198	1	1		N	FOR	Pediculus humanus corporis	Aquaporin-4 OS=Mus musculus GN=Aqp4 PE=2 SV=2	3E-010	sp|P55088|AQP4_MOUSE	63.9	50	323	50	16	25	0	210	1	1	Mus musculus
TI-408	408	N	42	0	TI-408	125				1	0	1	1	Unknown product	uk				RDRP	0.61	gi|262092990	35	36	216	40	17	22	0	35	1	1		N	FOR	Slow bee paralysis virus
TI-409	409	M	87	0	TI-409	264		ATG	*	1	0	1	1	pre-mRNA-splicing factor cwc15 Pediculus humanus corporis	uc	NR-LIGHT	1e-21	21.5	pre-mRNA-splicing factor cwc15, putative	1E-021	gi|242007951	103	49	232	96	22	2	0	1	1	1		N	FOR	Pediculus humanus corporis	Protein CWC15 homolog OS=Drosophila melanogaster GN=c12.1 PE=1 SV=1	1E-019	sp|Q9V3B6|CWC15_DROME	94.7	49	259	88	19	6	0	1	1	1	Drosophila melanogaster
TI-410	410	C	131	0	TI-410	392				1	0	1	1	low-density lipoprotein receptor Pediculus humanus corporis	st	NR-LIGHT	1e-45	2.7	low-density lipoprotein receptor, putative	1E-045	gi|242018517	184	3894	4603	64	85	46	0	214	1	11		N	FOR	Pediculus humanus corporis	Low-density lipoprotein receptor-related protein 1 OS=Gallus gallus GN=LRP1 PE=2	8E-030	sp|P98157|LRP1_CHICK	128	3804	4543	45	84	73	7	341	3	8	Gallus gallus
TI-412	412	M	208	0	TI-412	627		ATG	*	1	1	0	0	Unknown product	uk				Bombyrin	5E-008	gi|112983654	60.1	159	201	28	80	119	11	20	33	1		N	FOR	Bombyx mori	Apolipoprotein D OS=Macaca fascicularis GN=APOD PE=2 SV=1	4E-005	sp|Q8SPI0|APOD_MACFA	48.1	163	189	29	87	125	20	23	31	1	Macaca fascicularis
TI-414	414	N	148	0	TI-414	441				1	0	1	1	Unknown product	uk				similar to CG4404 CG4404-PA	1E-007	gi|198424403	57.8	112	294	27	38	88	8	12	16	1		N	FOR	Ciona intestinalis	Transcription factor Adf-1 OS=Drosophila melanogaster GN=Adf1 PE=1 SV=2	0.001	sp|P05552|ADF1_DROME	42.4	87	262	22	34	84	21	25	16	1	Drosophila melanogaster
TI-415	415	F	79	0	TI-415	240			*	1	0	1	1	Unknown product	uk				conserved hypothetical protein	0.36	gi|307332814	35.8	38	220	51	18	19	0	168	32	1		N	FOR	Streptomyces violaceusniger Tu 4113
TI-416	416	G	30	0	TI-416	93			*	1	0	1	1	Unknown product	uk
TI-417	417	M	159	0	TI-417	480		ATG	*	0	2	-2	2	TRAPP complex subunit Bet3 (predicted) - TRAPP complex - intracellular protein transport - ER to Golgi vesicle-mediated transport - molecular_function	pe	GO	1e-21	51	AGAP002385-PA	5E-058	gi|58383485	224	141	154	70	92	42	0	12	17	1		N	FOR	Anopheles gambiae str. PEST	Trafficking protein particle complex subunit 6B OS=Homo sapiens GN=TRAPPC6B PE=1	3E-042	sp|Q86SZ2|TPC6B_HUMAN	170	124	158	59	79	51	0	33	34	1	Homo sapiens
TI-418	418	T	206	2.91262	TI-418	617				0	2	-2	2	60S acidic ribosomal protein P0	ps	NR-LIGHT	0	64	60S acidic ribosomal protein P0	1E-101	gi|263173401	371	204	320	88	64	24	0	15	1	1		N	FOR	Cimex lectularius	60S acidic ribosomal protein P0 OS=Ceratitis capitata GN=RpLP0 PE=3 SV=1	1E-089	sp|Q9U3U0|RLA0_CERCA	328	202	317	79	64	42	0	16	2	1	Ceratitis capitata
TI-419	419	S	40	0	TI-419	123			*	0	1	-1	1	Unknown product	uk				hypothetical protein TcasGA2_TC013920	1.3	gi|270007359	33.9	19	229	65	9	7	0	142	1	1		N	FOR	Tribolium castaneum
TI-421	421	F	11	0	TI-421	36			*	0	1	-1	1	Unknown product	uk
TI-422	422	F	241	0	TI-422	726			*	0	1	-1	1	nonstructural protein precursor Triatoma virus	vir/	NR-LIGHT	0	13.4	nonstructural protein precursor	1E-122	gi|20451029	438	240	1795	90	13	23	0	408	1	1		N	FOR	Triatoma virus
TI-423	423	M	219	0	TI-423	656		ATG		3	0	3	3	cathepsin D	pm	NR-LIGHT	1e-51	56.1	cathepsin D	1E-051	gi|301030231	204	215	390	47	55	115	6	3	2	1		N	FOR	Triatoma infestans	Lysosomal aspartic protease OS=Aedes aegypti GN=AAEL006169 PE=1 SV=2	2E-046	sp|Q03168|ASPP_AEDAE	185	195	387	49	51	100	4	21	21	1	Aedes aegypti
TI-424	424	M	105	0	TI-424	318		ATG	*	1	4	-3	3	Unknown product	uk				unnamed protein product	0.21	gi|10177771	36.6	45	326	34	14	33	4	128	56	1		N	FOR	Arabidopsis thaliana
TI-425	425	N	211	0	TI-425	636			*	3	3	0	0	Unknown product	uk				late embryogenesis abundant domain-containing protein, putative	3.6	gi|221485238	33.9	58	517	31	11	43	4	431	90	1		N	FOR	Toxoplasma gondii GT1
TI-426	426	P	73	0	TI-426	222			*	2	2	0	0	capsid protein precursor Triatoma virus	vir/	NR-LIGHT	3e-31	8.4	capsid protein precursor	3E-031	gi|20451030	135	72	868	95	8	3	0	796	1	1		N	FOR	Triatoma virus
TI-427	427	S	24	0	TI-427	75			*	2	0	2	2	Unknown product	uk
TI-428	428	V	47	0	TI-428	144			*	1	0	1	1	Unknown product	uk				hypothetical protein	0.29	gi|256065190	36.2	22	115	69	20	7	0	3	25	1		N	FOR	Schistosoma mansoni
TI-429	429	G	57	0	TI-429	174			*	2	3	-1	1	cytochrome oxidase subunit 2	met/energy	NR-LIGHT	8e-09	25.5	cytochrome oxidase subunit 2	8E-009	gi|149689096	61.2	56	223	56	26	25	0	5	1	1		N	FOR	Triatoma infestans	Cytochrome c oxidase subunit 2 OS=Anopheles quadrimaculatus GN=COXII PE=3 SV=1	2E-006	sp|P33505|COX2_ANOQU	51.2	56	228	43	25	32	0	8	1	1	Anopheles quadrimaculatus
TI-430	430	R	395	1.01266	TI-430	1184				4	1	3	3	capsid protein precursor Triatoma virus	vir/	NR-LIGHT	0	43.6	capsid protein precursor	0.0	gi|20451030	732	378	868	95	44	17	0	381	6	1		N	FOR	Triatoma virus	Structural polyprotein OS=Cricket paralysis virus (isolate Teleogryllus	8E-021	sp|P13418|POLS_CRPVC	101	341	895	26	38	269	46	409	6	1	Cricket paralysis virus (isolate Teleogryllus commodus/Australia/CrPVVIC/1968)
TI-431	431	M	173	14.4509	TI-431	522	Y	ATG	*	0	4	-4	4	Ubiquitin-40S ribosomal protein S27a	ps	SWISSP	9e-34	76.7	hypothetical protein AND_22679	2E-033	gi|312371071	143	118	156	63	76	43	0	1	1	1		N	FOR	Anopheles darlingi	Ubiquitin-40S ribosomal protein S27a OS=Plutella xylostella PE=2 SV=2	9E-034	sp|P68202|RS27A_PLUXY	142	118	155	63	77	43	0	1	1	1	Plutella xylostella
TI-432	432	L	70	0	TI-432	213			*	2	1	1	1	cytochrome B	met/energy	NR-LIGHT	2e-20	23.2	cytochrome B	2E-020	gi|317408312	100	51	224	92	23	4	0	83	19	1		N	FOR	Triatoma infestans	Cytochrome b OS=Corvus brachyrhynchos GN=MT-CYB PE=3 SV=1	3E-013	sp|Q950C7|CYB_CORBR	73.6	51	380	65	14	18	0	194	19	1	Corvus brachyrhynchos
TI-433	433	X	125	4	TI-433	378			*	0	2	-2	2	Unknown product	uk				AGAP001637-PA	4E-006	gi|333470126	52.4	65	205	39	32	41	7	28	63	1		N	FOR	Anopheles gambiae str. PEST
TI-434	434	T	107	0	TI-434	324			*	2	0	2	2	Defensin - extracellular space - positive regulation of biosynthetic process of antibacterial peptides active against Gram-positive bacteria -	imm	GO	2e-05	65.2	defensin 4	1E-045	gi|197281888	183	91	93	92	99	7	0	2	16	1		N	FOR	Triatoma brasiliensis	Defensin OS=Pyrrhocoris apterus PE=1 SV=1	1E-013	sp|P37364|DEFI_PYRAP	75.1	42	43	69	100	13	0	1	65	1	Pyrrhocoris apterus
TI-435	435	Y	102	0	TI-435	303				0	2	-2	2	Unknown product	uk				synaptic vesicle glycoprotein 2B-like isoform 1	7.7	gi|66499643	31.6	93	550	26	17	71	5	256	4	1		N	FOR	Apis mellifera
TI-437	437	K	93	0	TI-437	282			*	0	1	-1	1	Unknown product	uk				obstructor-J	2.1	gi|24667196	33.5	44	353	37	13	28	1	89	39	1		N	FOR	Drosophila melanogaster
TI-438	438	K	55	12.7273	TI-438	168	Y		*	1	0	1	1	cytochrome oxidase subunit 2	met/energy	NR-LIGHT	4e-16	24.6	cytochrome oxidase subunit 2	4E-016	gi|149689096	85.9	54	223	80	25	11	0	46	1	1		N	FOR	Triatoma infestans	Cytochrome c oxidase subunit 2 OS=Simulium vittatum GN=COII PE=3 SV=1	7E-013	sp|P98021|COX2_SIMVI	72.4	54	229	61	24	21	0	49	1	1	Simulium vittatum
TI-439	439	G	206	0	TI-439	621			*	2	1	1	1	nonstructural protein precursor Triatoma virus	vir/	NR-LIGHT	2e-77	8.9	nonstructural protein precursor	2E-077	gi|20451029	290	160	1795	89	9	17	0	841	2	1		N	FOR	Triatoma virus
TI-440	440	N	248	5.64516	TI-440	742	Y			0	1	-1	1	probable maltase H	met/carb	NR-LIGHT	3e-49	41.7	probable maltase H	3E-049	gi|193709215	197	256	621	40	41	154	14	131	1	1		N	FOR	Acyrthosiphon pisum	Probable maltase OS=Aedes aegypti GN=MAL1 PE=2 SV=1	3E-047	sp|P13080|MALT_AEDAE	188	258	579	38	45	159	11	118	1	1	Aedes aegypti
TI-441	441	G	212	0	TI-441	639			*	1	0	1	1	proteasome subunit alpha type Pediculus humanus corporis	prot	NR-LIGHT	2e-55	58.3	proteasome subunit alpha type, putative	2E-055	gi|242003283	217	169	293	59	58	69	1	84	1	1		N	FOR	Pediculus humanus corporis	Proteasome subunit alpha type-1 OS=Dictyostelium discoideum GN=psmA1 PE=3 SV=1	2E-045	sp|Q27562|PSA1_DICDI	182	170	248	53	69	80	2	71	1	1	Dictyostelium discoideum
TI-445	445	E	120	0	TI-445	363			*	2	1	1	1	nonstructural protein precursor Triatoma virus	vir/	NR-LIGHT	7e-64	6.6	nonstructural protein precursor	7E-064	gi|20451029	244	119	1795	97	7	3	0	1676	1	1		N	FOR	Triatoma virus	Replicase polyprotein OS=Drosophila C virus (strain EB) GN=ORF1 PE=4 SV=1	2E-008	sp|O36966|POLN_DCVEB	57.8	78	1759	37	4	49	0	1648	4	1	Drosophila C virus (strain EB)
TI-446	446	Y	16	0	TI-446	51			*	0	1	-1	1	Unknown product	uk
TI-447	447	K	211	0	TI-447	632				0	2	-2	2	Triosephosphate isomerase	uc	SWISSP	3e-69	69.3	triosephosphate isomerase	1E-068	gi|45382061	261	171	248	68	69	54	0	4	40	1		N	FOR	Gallus gallus	Triosephosphate isomerase OS=Gallus gallus GN=TPI1 PE=1 SV=2	3E-069	sp|P00940|TPIS_CHICK	261	171	248	68	69	54	0	4	40	1	Gallus gallus
TI-448	448	I	231	0	TI-448	696			*	1	1	0	0	Unknown product	uk				hypothetical protein PsyrptK_26593	0.76	gi|302063566	36.6	52	177	37	30	36	5	58	41	1		N	FOR	Pseudomonas syringae pv. tomato NCPPB 1108
TI-449	449	G	149	0	TI-449	450			*	2	0	2	2	aldo-keto reductase family 1 member B1 (aldose reductase) - positive regulation of smooth muscle cell proliferation - positive regulation of	cs	GO	3e-32	47.7	aldo-keto reductase family 1 member B10-like	2E-039	gi|193601268	162	142	320	55	45	64	1	164	1	1		N	FOR	Acyrthosiphon pisum	Aldose reductase OS=Bos taurus GN=AKR1B1 PE=1 SV=1	7E-033	sp|P16116|ALDR_BOVIN	139	149	315	47	48	79	3	157	1	1	Bos taurus
TI-450	450	M	169	0	TI-450	510		ATG	*	0	2	-2	2	ribosomal protein L35Ae Tribolium castaneum	ps	NR-LIGHT	2e-47	79.7	similar to ribosomal protein L35Ae	2E-047	gi|91094995	190	113	143	81	80	21	1	30	57	1		N	FOR	Tribolium castaneum	60S ribosomal protein L35a OS=Pongo abelii GN=RPL35A PE=3 SV=1	5E-036	sp|Q5R8K6|RL35A_PONAB	150	107	110	65	98	38	2	3	60	1	Pongo abelii
TI-454	454	I	15	0	TI-454	48			*	0	1	-1	1	Unknown product	uk
TI-455	455	S	41	0	TI-455	126			*	1	1	0	0	Unknown product	uk
TI-456	456	F	10	0	TI-456	33			*	1	0	1	1	Unknown product	uk
TI-457	457	M	113	0	TI-457	342		ATG	*	2	2	0	0	fatty acid-binding lipocalin	met/lipd	NR-LIGHT	1e-43	100	fatty acid-binding lipocalin	1E-043	gi|263173263	177	108	109	77	100	24	0	1	5	1		N	FOR	Cimex lectularius	Fatty acid-binding protein, muscle OS=Schistocerca gregaria PE=1 SV=2	3E-027	sp|P41496|FABPM_SCHGR	120	111	134	57	84	48	1	22	1	1	Schistocerca gregaria
TI-458	458	M	376	0	TI-458	1131		ATG	*	7	3	4	4	Actin-5C	cs	NR-LIGHT	0	100	actin 5C, isoform B	0.0	gi|17530805	784	375	376	99	100	1	0	1	1	1		N	FOR	Anopheles gambiae str. PEST	Actin-5C OS=Anopheles gambiae GN=Act5C PE=2 SV=1	0.0	sp|P84185|ACT5C_ANOGA	784	375	376	99	100	1	0	1	1	1	Anopheles gambiae
TI-460	460	R	104	10.5769	TI-460	315	Y		*	1	0	1	1	Unknown product	uk				hypothetical protein AND_19389	6.8	gi|312372995	31.6	29	491	40	6	18	0	413	10	1		N	FOR	Anopheles darlingi
TI-461	461	K	75	0	TI-461	228			*	1	0	1	1	COMM domain containing 7 - NF-kappaB binding - tumor necrosis factor-mediated signaling pathway - negative regulation of NF-kappaB transcription	imm	GO	3e-13	34	hypothetical protein BRAFLDRAFT_108193	4E-015	gi|260822352	82.4	69	202	50	35	35	0	131	5	1		N	FOR	Branchiostoma floridae	COMM domain-containing protein 7 OS=Mus musculus GN=Commd7 PE=2 SV=1	1E-012	sp|Q8BG94|COMD7_MOUSE	72	68	200	44	35	38	0	129	5	1	Mus musculus
TI-462	462	R	59	0	TI-462	180			*	1	0	1	1	Unknown product	uk				conserved hypothetical protein	0.58	gi|221485776	35.4	50	445	31	11	35	1	368	1	1		N	FOR	Toxoplasma gondii GT1
TI-465	465	I	117	0	TI-465	354			*	1	2	-1	1	Unknown product	uk				trpm, isoform F	0.097	gi|221330281	37.7	75	1942	33	4	57	11	1492	21	1		N	FOR	Drosophila melanogaster
TI-466	466	F	64	0	TI-466	192				0	3	-3	3	Unknown product	uk
TI-467	467	M	143	0	TI-467	428		ATG		1	0	1	1	box H/ACA snoRNP Ixodes scapularis	uc	NR-LIGHT	5e-25	76.4	box H/ACA snoRNP, putative	5E-025	gi|241855547	115	139	187	44	75	79	3	1	1	1		N	FOR	Ixodes scapularis	H/ACA ribonucleoprotein complex subunit 2-like protein OS=Drosophila	1E-017	sp|Q9V3U2|NHP2_DROME	88.6	93	160	46	59	50	3	19	52	1	Drosophila melanogaster
TI-468	468	M	100	0	TI-468	303		ATG	*	0	2	-2	2	hypothetical protein	uc	NR-LIGHT	4e-24	82	hypothetical protein	4E-024	gi|149898849	112	81	100	68	82	26	0	1	1	1		N	FOR	Triatoma infestans
TI-469	469	M	195	0	TI-469	584		ATG	*	1	3	-2	2	Unknown product	uk				AGAP009281-PA	1E-010	gi|158300081	68.2	139	193	29	73	108	14	33	39	1		N	FOR	Anopheles gambiae str. PEST	Apolipoprotein D OS=Macaca fascicularis GN=APOD PE=2 SV=1	8E-010	sp|Q8SPI0|APOD_MACFA	63.5	139	189	28	74	113	28	15	28	1	Macaca fascicularis
TI-473	473	D	111	0	TI-473	336			*	0	1	-1	1	CG6873 - actin binding	cs	GO	2e-31	74.3	conserved hypothetical protein	4E-057	gi|242008321	221	110	152	95	73	5	0	42	1	1		N	FOR	Pediculus humanus corporis	Cofilin/actin-depolymerizing factor homolog OS=Drosophila melanogaster GN=tsr	2E-053	sp|P45594|CADF_DROME	207	110	148	90	75	10	0	38	1	1	Drosophila melanogaster
TI-474	474	F	206	0	TI-474	621			*	4	0	4	4	crystallin alpha B - contractile fiber - camera-type eye development - muscle organ development - structural constituent of eye lens - Z disc -	cs	GO	2e-30	96	protein lethal, putative	2E-051	gi|242005722	204	174	211	56	83	78	4	23	21	1		N	FOR	Pediculus humanus corporis	Protein lethal(2)essential for life OS=Drosophila melanogaster GN=l(2)efl PE=1	9E-038	sp|P82147|L2EFL_DROME	156	184	187	43	99	105	6	1	21	1	Drosophila melanogaster
TI-478	478	L	10	0	TI-478	33			*	0	1	-1	1	Unknown product	uk
TI-482	482	E	138	0	TI-482	417			*	1	0	1	1	cathepsin D	pm	NR-LIGHT	7e-42	35.3	cathepsin D	7E-042	gi|301030231	171	136	390	57	35	59	1	253	1	1		N	FOR	Triatoma infestans	Cathepsin D OS=Homo sapiens GN=CTSD PE=1 SV=1	1E-023	sp|P07339|CATD_HUMAN	107	131	412	39	32	80	2	276	6	1	Homo sapiens
TI-485	485	F	30	0	TI-485	90				0	1	-1	1	Unknown product	uk
TI-486	486	K	16	0	TI-486	51			*	0	1	-1	1	Unknown product	uk
TI-488	488	T	29	0	TI-488	84				1	1	0	0	Unknown product	uk
TI-489	489	C	54	18.5185	TI-489	160	Y			0	2	-2	2	Unknown product	uk
TI-490	490	M	94	0	TI-490	285		ATG	*	0	5	-5	5	Defensin - extracellular space - positive regulation of biosynthetic process of antibacterial peptides active against Gram-positive bacteria -	imm	GO	6e-07	100	defensin	6E-049	gi|89112752	194	93	94	98	100	1	0	1	1	1		N	FOR	Triatoma infestans	Defensin OS=Pyrrhocoris apterus PE=1 SV=1	6E-011	sp|P37364|DEFI_PYRAP	66.2	42	43	62	100	16	0	1	52	1	Pyrrhocoris apterus
TI-493	493	S	225	1.77778	TI-493	678			*	0	1	-1	1	hypothetical protein AaeL_AAEL007562 Aedes aegypti	uc	NR-LIGHT	4e-68	51	hypothetical protein AaeL_AAEL007562	4E-068	gi|157116383	259	214	421	57	51	91	5	77	14	1		N	FOR	Aedes aegypti	Dual oxidase maturation factor 1 OS=Xenopus tropicalis GN=duoxa1 PE=2 SV=1	3E-027	sp|Q0P4G7|DOXA1_XENTR	121	178	308	37	58	113	6	85	30	1	Xenopus tropicalis
TI-494	494	M	143	0	TI-494	432		ATG	*	4	1	3	3	40S ribosomal protein S23	ps	SWISSP	3e-75	100	40S ribosomal protein S23, putative	4E-075	gi|242025351	281	142	143	96	100	5	0	1	1	1		N	FOR	Pediculus humanus corporis	40S ribosomal protein S23 OS=Spodoptera frugiperda GN=RpS23 PE=2 SV=1	3E-075	sp|Q962Q7|RS23_SPOFR	279	142	143	95	100	6	0	1	1	1	Spodoptera frugiperda
TI-495	495	M	208	0	TI-495	627		ATG	*	1	4	-3	3	40S ribosomal protein S8	ps	NR-LIGHT	0	100	40S ribosomal protein S8	1E-106	gi|149689088	387	207	208	91	100	17	0	1	1	1		N	FOR	Triatoma infestans	40S ribosomal protein S8 OS=Apis mellifera GN=RpS8 PE=2 SV=2	1E-090	sp|O76756|RS8_APIME	332	207	208	76	100	48	0	1	1	1	Apis mellifera
TI-497	497	L	250	1.2	TI-497	748				0	1	-1	1	FL(2)D protein	uc	NR-LIGHT	5e-49	42	similar to FL(2)D protein, putative	5E-049	gi|156545287	196	204	488	51	42	99	22	92	5	1		N	FOR	Nasonia vitripennis	Pre-mRNA-splicing regulator female-lethal(2)D OS=Drosophila pseudoobscura	1E-043	sp|Q28XY0|FL2D_DROPS	176	175	560	55	31	79	22	142	34	1	Drosophila pseudoobscura pseudoobscura
TI-498	498	T	22	0	TI-498	69			*	1	0	1	1	Unknown product	uk
TI-501	501	F	195	2.05128	TI-501	588			*	0	1	-1	1	microsomal signal peptidase 25 kD subunit	pm/protease	NR-LIGHT	1e-82	98.9	putative microsomal signal peptidase 25 kD subunit	1E-082	gi|263173484	307	190	193	75	99	47	0	3	5	1		N	FOR	Cimex lectularius	Probable signal peptidase complex subunit 2 OS=Xenopus tropicalis GN=spcs2 PE=2	4E-059	sp|Q5M8Y1|SPCS2_XENTR	227	189	201	56	95	82	0	12	6	1	Xenopus tropicalis
TI-502	502	X	89	1.12359	TI-502	270			*	0	1	-1	1	40S ribosomal protein S7-like Acyrthosiphon pisum	ps	NR-LIGHT	2e-33	45.3	40S ribosomal protein S7-like	2E-033	gi|285002187	142	87	194	76	45	21	0	107	2	1		N	FOR	Acyrthosiphon pisum	40S ribosomal protein S7 OS=Spodoptera frugiperda GN=RpS7 PE=2 SV=1	6E-033	sp|Q962S0|RS7_SPOFR	139	87	190	76	46	21	0	103	2	1	Spodoptera frugiperda
TI-505	505	I	26	0	TI-505	81			*	0	1	-1	1	Unknown product	uk
TI-506	506	M	146	0	TI-506	441		ATG	*	0	1	-1	1	nucleoporin 50kDa	uc	NR-LIGHT	1e-11	40	similar to nucleoporin 50kDa	1E-011	gi|91081011	70.9	126	365	37	35	91	23	1	1	1		N	FOR	Tribolium castaneum
TI-508	508	M	105	4.7619	TI-508	318		ATG	*	1	0	1	1	thioredoxin	uc	NR-LIGHT	3e-44	100	thioredoxin	3E-044	gi|307095132	179	104	105	86	100	14	0	1	1	1		N	FOR	Triatoma matogrossensis	Thioredoxin-2 OS=Drosophila yakuba GN=Trx-2 PE=3 SV=1	7E-023	sp|Q6XHI1|THIO2_DROYA	105	101	106	50	96	50	1	1	1	1	Drosophila yakuba
TI-512	512	A	185	0	TI-512	554			*	0	1	-1	1	Unknown product	uk				50 kDa midgut protein	0.006	gi|157361569	42.7	102	440	29	23	73	1	263	82	1		N	FOR	Phlebotomus papatasi
TI-515	515	A	123	0	TI-515	372			*	0	1	-1	1	Unknown product	uk				sister chromatid cohesion protein PDS5 homolog B-B-like	0.85	gi|193603334	34.7	68	1203	36	6	46	4	723	41	1		N	FOR	Acyrthosiphon pisum
TI-517	517	H	67	58.209	TI-517	204	Y		*	0	1	-1	1	Unknown product	uk
TI-518	518	N	35	0	TI-518	108			*	0	1	-1	1	Unknown product	uk
TI-519	519	P	222	0	TI-519	663				0	1	-1	1	reverse transcriptase	te	NR-LIGHT	4e-13	12.9	reverse transcriptase	4E-013	gi|40457592	77	110	857	39	13	67	0	277	86	1		N	FOR	Drosophila melanogaster
TI-520	520	K	32	0	TI-520	99			*	1	0	1	1	Unknown product	uk
TI-521	521	E	165	0	TI-521	492				9	8	1	1	nonstructural protein precursor Triatoma virus	vir/	NR-LIGHT	2e-68	8.5	nonstructural protein precursor	2E-068	gi|20451029	259	153	1795	77	9	34	0	1	1	1		N	FOR	Triatoma virus
TI-522	522	F	53	0	TI-522	162			*	1	0	1	1	Unknown product	uk
TI-524	524	V	211	0	TI-524	636			*	0	3	-3	3	Unknown product	uk				hypothetical protein	1E-007	gi|156544907	58.9	589	1493	23	40	149	6	898	13	2		N	FOR	Nasonia vitripennis
TI-525	525	V	217	0	TI-525	654			*	3	4	-1	1	Unknown product	uk				hypothetical protein	1E-010	gi|156544907	68.9	1258	1493	25	84	145	6	229	20	3		N	FOR	Nasonia vitripennis
TI-526	526	D	196	0	TI-526	591			*	15	12	3	3	capsid protein precursor Triatoma virus	vir/	NR-LIGHT	0	22.5	capsid protein precursor	1E-109	gi|20451030	397	195	868	99	23	1	0	673	1	1		N	FOR	Triatoma virus	Undecaprenyl-diphosphatase OS=Synechococcus sp. (strain CC9311) GN=uppP PE=3	0.006	sp|Q0I740|UPPP_SYNS3	40.8	91	283	31	33	63	2	142	94	1	Synechococcus sp. (strain CC9311)
TI-528	528	N	45	0	TI-528	138			*	1	0	1	1	Unknown product	uk
TI-530	530	M	240	0	TI-530	723		ATG	*	4	1	3	3	Unknown product	uk				similar to CG14661 CG14661-PA	0.003	gi|91082781	44.7	209	249	21	84	168	13	37	35	1		N	FOR	Tribolium castaneum
TI-531	531	A	255	0	TI-531	768			*	3	3	0	0	Unknown product	uk				hypothetical protein DAPPUDRAFT_308200	2E-005	gi|321461569	51.6	114	450	26	26	84	7	37	36	1		N	FOR	Daphnia pulex
TI-532	532	K	124	0	TI-532	375			*	0	2	-2	2	Unknown product	uk				kininogen 1, isoform CRA_b	0.008	gi|119598586	41.6	68	644	31	11	47	6	262	29	1		N	FOR	Homo sapiens	Sarcocystatin-A OS=Sarcophaga peregrina PE=1 SV=1	9E-005	sp|P31727|CYTA_SARPE	45.4	96	122	29	80	70	7	3	11	1	Sarcophaga peregrina
TI-533	533	Y	36	0	TI-533	111			*	1	0	1	1	Unknown product	uk
TI-534	534	T	45	0	TI-534	138			*	0	1	-1	1	Unknown product	uk				hypothetical protein Bm1_17870	4E-006	gi|170579899	52.4	24	62	92	40	2	0	1	21	1		N	FOR	Brugia malayi
TI-535	535	I	41	0	TI-535	126			*	0	2	-2	2	Unknown product	uk
TI-536	536	K	137	0	TI-536	414			*	3	1	2	2	CG41536 CG41536-PA	uc	NR-LIGHT	1e-28	50.3	similar to CG41536 CG41536-PA	1E-028	gi|189242281	127	78	159	77	50	18	1	79	5	1		N	FOR	Tribolium castaneum	Putative uncharacterized protein ART2 OS=Saccharomyces cerevisiae (strain ATCC	7E-010	sp|Q8TGM7|ART2_YEAST	62.4	52	61	58	87	22	0	6	19	1	Saccharomyces cerevisiae (strain ATCC 204508 / S288c)
TI-537	537	H	118	0	TI-537	357			*	0	1	-1	1	CG41536 CG41536-PA partial Tribolium castaneum	uc	NR-LIGHT	7e-16	43	similar to CG41536 CG41536-PA, partial	7E-016	gi|189242234	84.7	52	125	77	42	12	1	71	12	1		N	FOR	Tribolium castaneum	Putative uncharacterized protein ART2 OS=Saccharomyces cerevisiae (strain ATCC	5E-007	sp|Q8TGM7|ART2_YEAST	53.1	40	61	63	67	15	0	18	12	1	Saccharomyces cerevisiae (strain ATCC 204508 / S288c)
TI-538	538	P	57	0	TI-538	174			*	17	7	10	10	Unknown product	uk
TI-539	539	L	101	0	TI-539	306			*	0	1	-1	1	salivary secreted peptide	s/	NR-LIGHT	6e-13	72.7	AGAP011630-PA	2E-013	gi|158301127	76.6	96	120	42	81	56	1	24	4	1		N	FOR	Anopheles gambiae str. PEST
TI-540	540	R	13	0	TI-540	42			*	1	0	1	1	Unknown product	uk
TI-541	541	F	136	0	TI-541	405				0	1	-1	1	Unknown product	uk				neuregulin beta-2b	1.8	gi|2961139	33.5	42	480	39	9	26	3	345	66	1		N	FOR	Gallus gallus
TI-543	543	I	80	0	TI-543	243			*	6	1	5	5	NADH dehydrogenase subunit 2 Triatoma dimidiata	uc	NR-LIGHT	1e-20	24	NADH dehydrogenase subunit 2	1E-020	gi|11182463	100	79	332	62	24	30	0	31	1	1		N	FOR	Triatoma dimidiata	NADH-ubiquinone oxidoreductase chain 2 OS=Hylobates lar GN=MT-ND2 PE=3 SV=1	4E-006	sp|Q95704|NU2M_HYLLA	50.1	82	347	31	24	57	3	31	1	1	Hylobates lar
TI-544	544	V	81	11.1111	TI-544	246	Y		*	52	60	-8	8	Unknown product	uk
TI-545	545	L	35	0	TI-545	108			*	1	1	0	0	Unknown product	uk
TI-547	547	S	162	4.32099	TI-547	484	Y			0	1	-1	1	Probable arginine kinase ZC434.8 - protein binding	st	GO	5e-50	44.7	arginine kinase	3E-076	gi|116235665	285	158	356	86	45	22	0	61	4	1		N	FOR	Triatoma vitticeps	Arginine kinase OS=Apis mellifera GN=ARGK PE=2 SV=1	1E-069	sp|O61367|KARG_APIME	261	157	355	78	45	34	0	61	5	1	Apis mellifera
TI-548	548	M	315	0	TI-548	944		ATG		1	5	-4	4	Probable arginine kinase ZC434.8 - protein binding	st	GO	0	87.2	arginine kinase	0.0	gi|116235665	646	314	356	97	88	7	0	1	1	1		N	FOR	Triatoma vitticeps	Arginine kinase OS=Schistocerca americana GN=ARGK PE=2 SV=1	1E-166	sp|P91798|KARG_SCHAM	585	314	356	86	88	43	0	1	1	1	Schistocerca americana
TI-549	549	M	121	0	TI-549	362		ATG		1	2	-1	1	Unknown product	uk				transcription factor IIIA - human (fragment) gi|551535|gb|AAA21873.1|	5.1	gi|7443519	32	90	338	25	27	69	10	94	17	1		N	FOR	Homo sapiens
TI-550	550	L	38	0	TI-550	117			*	0	1	-1	1	Unknown product	uk
TI-552	552	M	129	7.75194	TI-552	390	Y	ATG	*	1	0	1	1	salivary secreted protein	s/	NR-LIGHT	1e-51	100	salivary secreted protein	1E-051	gi|149689094	203	128	129	79	100	27	0	1	1	1		N	FOR	Triatoma infestans
TI-553	553	F	17	0	TI-553	54			*	0	1	-1	1	Unknown product	uk
TI-555	555	I	231	0.4329	TI-555	692				0	1	-1	1	CG10527 - farnesoic acid O-methyltransferase	met/lipd	GO	1e-12	43.8	hypothetical protein LOC100164577 isoform 2	8E-022	gi|328717080	106	158	167	38	95	100	6	9	61	1		N	FOR	Acyrthosiphon pisum
TI-556	556	M	242	0	TI-556	724		ATG		3	2	1	1	triabin-like lipocalin precursor	s/	NR-LIGHT	2e-13	88.5	triabin-like lipocalin precursor	2E-013	gi|307094892	78.6	179	210	31	86	128	18	1	1	1		N	FOR	Triatoma matogrossensis	Triabin OS=Triatoma pallidipennis PE=1 SV=1	0.003	sp|Q27049|TRIA_TRIPA	42.4	148	160	28	93	124	37	1	1	1	Triatoma pallidipennis
TI-557	557	X	35	77.1429	TI-557	78	Y			3	1	2	2	Unknown product	uk
TI-558	558	R	37	0	TI-558	114			*	1	0	1	1	Unknown product	uk
TI-561	561	S	206	0	TI-561	621			*	0	1	-1	1	zgc:103600 - biological_process - cellular_component	uc	GO	3e-40	97.8	hypothetical protein LOC792049	5E-039	gi|158262065	162	182	187	47	98	96	2	3	4	1		N	FOR	Danio rerio	Tetratricopeptide repeat protein 36 OS=Danio rerio GN=ttc36 PE=2 SV=1	1E-039	sp|A8E7I5|TTC36_DANRE	162	182	187	47	98	96	2	3	4	1	Danio rerio
TI-562	562	H	223	0	TI-562	672			*	1	0	1	1	Unknown product	uk				putative protein	0.60	gi|10129645	36.6	90	218	29	42	68	13	53	97	1		N	FOR	Arabidopsis thaliana
TI-563	563	S	46	0	TI-563	135				1	0	1	1	Unknown product	uk				zinc finger protein GLI1	1.1	gi|170035164	34.3	39	670	37	6	25	0	176	1	1		N	FOR	Culex quinquefasciatus
TI-564	564	K	210	0	TI-564	633			*	4	0	4	4	nitrophorin 1A precursor	s/	NR-LIGHT	6e-09	82.8	rhodnius biogenic aminebinding-like protein	4E-061	gi|307094890	236	197	211	55	94	89	1	9	14	1		N	FOR	Triatoma matogrossensis	Apolipoprotein D OS=Macaca fascicularis GN=APOD PE=2 SV=1	2E-004	sp|Q8SPI0|APOD_MACFA	46.2	160	189	24	85	137	25	27	30	1	Macaca fascicularis
TI-565	565	M	177	0	TI-565	530		ATG		4	0	4	4	rhodnius biogenic aminebinding-like protein	uc	NR-LIGHT	8e-48	84.8	rhodnius biogenic aminebinding-like protein	8E-048	gi|307094890	191	177	211	53	84	84	3	1	1	1		N	FOR	Triatoma matogrossensis	Apolipoprotein D OS=Macaca fascicularis GN=APOD PE=2 SV=1	0.002	sp|Q8SPI0|APOD_MACFA	42	112	189	26	60	99	24	27	24	1	Macaca fascicularis
TI-566	566	F	210	0	TI-566	629				0	2	-2	2	cathepsin D	pm	NR-LIGHT	1e-51	49.7	cathepsin D	1E-051	gi|301030231	204	191	390	52	49	92	2	23	17	1		N	FOR	Triatoma infestans	Cathepsin D OS=Gallus gallus GN=CTSD PE=1 SV=1	2E-042	sp|Q05744|CATD_CHICK	171	155	398	51	39	76	1	68	56	1	Gallus gallus
TI-567	567	K	126	7.93651	TI-567	381	Y		*	1	0	1	1	cathepsin D	pm	NR-LIGHT	3e-10	20.7	cathepsin D	3E-010	gi|301030231	65.9	78	390	43	20	46	2	3	1	1		N	FOR	Triatoma infestans	Cathepsin D OS=Chionodraco hamatus GN=ctsd PE=1 SV=2	4E-005	sp|O93428|CATD_CHIHA	46.6	82	396	36	21	53	5	4	4	1	Chionodraco hamatus
TI-568	568	V	199	0	TI-568	595				1	0	1	1	ubiquitin conjugating enzyme E2 J2 Tribolium castaneum	uc	NR-LIGHT	4e-57	83.5	similar to ubiquitin conjugating enzyme E2, J2	4E-057	gi|91082969	223	169	225	58	76	78	18	41	12	1		N	FOR	Tribolium castaneum	Ubiquitin-conjugating enzyme E2 J2 OS=Homo sapiens GN=UBE2J2 PE=1 SV=3	3E-055	sp|Q8N2K1|UB2J2_HUMAN	214	201	259	56	78	88	14	45	12	1	Homo sapiens
TI-569	569	V	99	0	TI-569	300			*	0	1	-1	1	hypothetical protein BRAFLDRAFT_115538 Branchiostoma floridae	uc	NR-LIGHT	9e-40	34.3	hypothetical protein BRAFLDRAFT_115538	9E-040	gi|260815086	164	81	239	90	34	8	0	42	12	1		N	FOR	Branchiostoma floridae	Ubiquitin-conjugating enzyme E2 J2 OS=Homo sapiens GN=UBE2J2 PE=1 SV=3	8E-039	sp|Q8N2K1|UB2J2_HUMAN	158	79	259	90	31	8	0	45	12	1	Homo sapiens
TI-570	570	I	75	40	TI-570	228	Y		*	0	4	-4	4	Unknown product	uk
TI-571	571	K	70	0	TI-571	207				0	1	-1	1	Unknown product	uk
TI-573	573	X	138	0.724638	TI-573	417			*	1	8	-7	7	thioredoxin reductase isoform 2	uc	NR-LIGHT	4e-55	27.2	similar to thioredoxin reductase isoform 2	4E-055	gi|91079422	214	133	492	71	27	38	0	359	5	1		N	FOR	Tribolium castaneum	Thioredoxin reductase 2, mitochondrial OS=Bos taurus GN=TXNRD2 PE=1 SV=2	2E-051	sp|Q9N2I8|TRXR2_BOVIN	200	131	511	65	26	45	0	378	5	1	Bos taurus
TI-574	574	Q	104	13.4615	TI-574	315			*	0	1	-1	1	thioredoxin reductase 1 isoform 1	uc	NR-LIGHT	2e-31	18.6	thioredoxin reductase 1 isoform 1	2E-031	gi|295842222	136	99	537	63	19	37	0	438	5	1		N	FOR	Apis mellifera	Thioredoxin reductase 2, mitochondrial OS=Bos taurus GN=TXNRD2 PE=1 SV=2	2E-028	sp|Q9N2I8|TRXR2_BOVIN	124	101	511	55	20	45	0	408	1	1	Bos taurus
TI-575	575	V	93	0	TI-575	276				4	2	2	2	mitochondrial ATPase subunit 6 - regulation of ATPase - neurological system process - muscle maintenance - determination of adult life span -	tr	GO	1e-21	41.5	truncated ATPase subunit 6	3E-034	gi|149898887	145	92	222	76	42	22	0	118	1	1		N	FOR	Triatoma infestans	ATP synthase subunit a OS=Aedes aegypti GN=mt:ATPase6 PE=2 SV=1	2E-021	sp|Q1HRS5|ATP6_AEDAE	100	91	226	53	41	43	1	122	3	1	Aedes aegypti
TI-576	576	V	114	0	TI-576	341				1	0	1	1	mitochondrial ATPase subunit 6 - regulation of ATPase - neurological system process - muscle maintenance - determination of adult life span -	tr	GO	8e-28	46.8	truncated ATPase subunit 6	2E-035	gi|149898887	149	104	222	72	47	29	0	118	1	1		N	FOR	Triatoma infestans	ATP synthase subunit a OS=Drosophila melanogaster GN=mt:ATPase6 PE=3 SV=2	3E-027	sp|P00850|ATP6_DROME	120	104	224	57	47	45	0	119	1	1	Drosophila melanogaster
TI-577	577	P	33	0	TI-577	102			*	0	1	-1	1	Unknown product	uk
TI-579	579	K	53	0	TI-579	162			*	0	1	-1	1	Unknown product	uk
TI-580	580	F	25	0	TI-580	78			*	0	5	-5	5	Unknown product	uk
TI-581	581	M	87	0	TI-581	264		ATG	*	1	0	1	1	defensin A	imm	NR-LIGHT	5e-12	82	defensin B	1E-012	gi|29335960	74.3	75	94	48	81	39	8	18	19	1		N	FOR	Rhodnius prolixus
TI-582	582	M	86	0	TI-582	261		ATG	*	1	0	1	1	defensin	imm	NR-LIGHT	7e-13	79.7	defensin A	3E-013	gi|149689102	76.3	73	93	52	80	35	8	18	19	1		N	FOR	Triatoma infestans
TI-583	583	L	44	0	TI-583	135			*	2	0	2	2	positive regulation of growth rate - hermaphrodite genitalia development - molting cycle collagen and cuticulin-based cuticle - nematode larval	extmat	GO	4e-11	10.5	eukaryotic initiation factor 4A-II, putative	5E-012	gi|242007840	72	41	449	78	9	9	0	408	2	1		N	FOR	Pediculus humanus corporis	ATP-dependent RNA helicase fal1 OS=Schizosaccharomyces pombe (strain ATCC 38366	5E-012	sp|Q10055|FAL1_SCHPO	69.7	41	394	69	11	13	0	353	2	1	Schizosaccharomyces pombe (strain ATCC 38366 / 972)
TI-584	584	M	28	89.2857	TI-584	83	Y	ATG		1	0	1	1	Unknown product	uk
TI-585	585	S	150	0	TI-585	453			*	1	0	1	1	Unknown product	uk
TI-586	586	V	58	1.72414	TI-586	177			*	1	0	1	1	secreted salivary peptide precursor	s/	NR-LIGHT	5e-10	39.5	putative secreted salivary peptide precursor	5E-010	gi|149689160	65.5	33	86	100	40	0	0	53	25	1		N	FOR	Triatoma infestans
TI-587	587	I	53	0	TI-587	162			*	2	0	2	2	Unknown product	uk				mannose-1-phosphate guanyltransferase alpha-B	3.5	gi|41053852	32.7	61	422	33	15	41	16	196	3	1		N	FOR	Danio rerio
TI-588	588	F	30	0	TI-588	93			*	1	0	1	1	Unknown product	uk
TI-589	589	M	120	0	TI-589	363		ATG	*	0	7	-7	7	conserved hypothetical protein	uc	NR-LIGHT	5e-25	94.3	similar to conserved hypothetical protein	5E-025	gi|156538160	115	150	160	45	94	82	43	1	3	1		N	FOR	Nasonia vitripennis	Chromatin complexes subunit BAP18 OS=Homo sapiens GN=BAP18 PE=1 SV=1	2E-010	sp|Q8IXM2|BAP18_HUMAN	64.3	90	172	42	53	52	36	1	3	1	Homo sapiens
TI-590	590	M	120	11.6667	TI-590	363		ATG	*	0	1	-1	1	conserved hypothetical protein	uc	NR-LIGHT	3e-15	94.3	similar to conserved hypothetical protein	3E-015	gi|156538160	82.4	150	160	35	94	97	43	1	3	1		N	FOR	Nasonia vitripennis
[truncated: 70 more columns]

## Sheet: up-reg
Protein name	Order Number	First residue	Seq size	%X	CDS name	Seq size	14 N's?	ATG?	*	Infected	Not Infected	Inf - nInf	Inf - nInf |H-I|	Description	uk	database	Evalue	coverage	Best match to NR-LIGHT protein database	E value	Match	Score	Extent of match	Length of best match	% identity	% Coverage	Mismatches	Gaps	First residue of match	First residue of sequence	Number of segments	Frame	Frame shift?	Orientation	Species of best match	Best match to SWISSP protein database	E value	Match	Score	Extent of match	Length of best match	% identity	% Coverage	Mismatches	Gaps	First residue of match	First residue of sequence	Number of segments	Species of best match
TI-5	5	N	236	0	TI-5	706				3	0	3	3	Choline transporter-like protein 4	tr	SWISSP	2e-29	30.1	hypothetical protein TcasGA2_TC001323	5E-048	gi|270002312	193	200	753	45	27	112	5	386	31	1		N	FOR	Tribolium castaneum	CTL-like protein 2 OS=Anopheles gambiae GN=AGAP010343 PE=3 SV=4	4E-043	sp|Q7PRJ0|CTLH2_ANOGA	174	207	790	43	26	120	8	421	31	1	Anopheles gambiae
TI-129	129	M	209	0	TI-129	630		ATG	*	6	1	5	5	cytochrome P450 CYP6BK17 Tribolium castaneum	detox/ox	NR-LIGHT	3e-52	42.5	similar to cytochrome P450 CYP6BK17	3E-052	gi|91084707	206	210	496	42	43	121	4	286	1	1		N	FOR	Tribolium castaneum	Probable cytochrome P450 6a14 OS=Drosophila melanogaster GN=Cyp6a14 PE=3 SV=2	2E-049	sp|Q9V4U7|C6A14_DROME	195	211	509	44	42	117	5	298	1	1	Drosophila melanogaster
TI-145	145	M	136	0	TI-145	411		ATG	*	3	0	3	3	ribosomal protein L27 Acyrthosiphon pisum	ps	NR-LIGHT	3e-56	100.7	ribosomal protein L27	3E-056	gi|187121184	219	134	135	77	100	31	1	1	1	1		N	FOR	Acyrthosiphon pisum	60S ribosomal protein L27 OS=Danio rerio GN=rpl27 PE=2 SV=3	6E-043	sp|Q7ZV82|RL27_DANRE	172	135	136	64	100	48	2	1	1	1	Danio rerio
TI-200	200	M	162	0	TI-200	489		ATG	*	4	0	4	4	selenoprotein S-like Acyrthosiphon pisum	detox/ox	NR-LIGHT	2e-08	78.6	hypothetical protein TcasGA2_TC002967	2E-010	gi|270003698	67	133	165	29	81	94	2	23	22	1		N	FOR	Tribolium castaneum
TI-239	239	I	42	0	TI-239	129			*	3	0	3	3	Unknown product	uk
TI-295	295	P	174	0	TI-295	525			*	3	0	3	3	CG5112 - lipid particle - fatty acid amide hydrolase	met/lipd	GO	1e-38	32.8	amidotransferase subunit A, putative	2E-046	gi|242007160	187	170	520	51	33	83	1	348	2	1		N	FOR	Pediculus humanus corporis	Fatty-acid amide hydrolase 2 OS=Homo sapiens GN=FAAH2 PE=2 SV=1	3E-036	sp|Q6GMR7|FAAH2_HUMAN	150	176	532	48	33	92	8	353	3	1	Homo sapiens
TI-324	324	M	247	0	TI-324	744		ATG	*	3	0	3	3	multifunctional chaperone	pm	NR-LIGHT	0	93.9	multifunctional chaperone	1E-130	gi|263173438	468	231	247	98	94	4	0	1	1	1		N	FOR	Cimex lectularius	14-3-3 protein zeta OS=Bombyx mori GN=14-3-3zeta PE=2 SV=2	1E-124	sp|Q2F637|1433Z_BOMMO	444	231	247	92	94	17	0	1	1	1	Bombyx mori
TI-423	423	M	219	0	TI-423	656		ATG		3	0	3	3	cathepsin D	pm	NR-LIGHT	1e-51	56.1	cathepsin D	1E-051	gi|301030231	204	215	390	47	55	115	6	3	2	1		N	FOR	Triatoma infestans	Lysosomal aspartic protease OS=Aedes aegypti GN=AAEL006169 PE=1 SV=2	2E-046	sp|Q03168|ASPP_AEDAE	185	195	387	49	51	100	4	21	21	1	Aedes aegypti
TI-458	458	M	376	0	TI-458	1131		ATG	*	7	3	4	4	Actin-5C	cs	NR-LIGHT	0	100	actin 5C, isoform B	0.0	gi|17530805	784	375	376	99	100	1	0	1	1	1		N	FOR	Anopheles gambiae str. PEST	Actin-5C OS=Anopheles gambiae GN=Act5C PE=2 SV=1	0.0	sp|P84185|ACT5C_ANOGA	784	375	376	99	100	1	0	1	1	1	Anopheles gambiae
TI-474	474	F	206	0	TI-474	621			*	4	0	4	4	crystallin alpha B - contractile fiber - camera-type eye development - muscle organ development - structural constituent of eye lens - Z disc -	cs	GO	2e-30	96	protein lethal, putative	2E-051	gi|242005722	204	174	211	56	83	78	4	23	21	1		N	FOR	Pediculus humanus corporis	Protein lethal(2)essential for life OS=Drosophila melanogaster GN=l(2)efl PE=1	9E-038	sp|P82147|L2EFL_DROME	156	184	187	43	99	105	6	1	21	1	Drosophila melanogaster
TI-494	494	M	143	0	TI-494	432		ATG	*	4	1	3	3	40S ribosomal protein S23	ps	SWISSP	3e-75	100	40S ribosomal protein S23, putative	4E-075	gi|242025351	281	142	143	96	100	5	0	1	1	1		N	FOR	Pediculus humanus corporis	40S ribosomal protein S23 OS=Spodoptera frugiperda GN=RpS23 PE=2 SV=1	3E-075	sp|Q962Q7|RS23_SPOFR	279	142	143	95	100	6	0	1	1	1	Spodoptera frugiperda
TI-530	530	M	240	0	TI-530	723		ATG	*	4	1	3	3	Unknown product	uk				similar to CG14661 CG14661-PA	0.003	gi|91082781	44.7	209	249	21	84	168	13	37	35	1		N	FOR	Tribolium castaneum
TI-538	538	P	57	0	TI-538	174			*	17	7	10	10	Unknown product	uk
TI-543	543	I	80	0	TI-543	243			*	6	1	5	5	NADH dehydrogenase subunit 2 Triatoma dimidiata	uc	NR-LIGHT	1e-20	24	NADH dehydrogenase subunit 2	1E-020	gi|11182463	100	79	332	62	24	30	0	31	1	1		N	FOR	Triatoma dimidiata	NADH-ubiquinone oxidoreductase chain 2 OS=Hylobates lar GN=MT-ND2 PE=3 SV=1	4E-006	sp|Q95704|NU2M_HYLLA	50.1	82	347	31	24	57	3	31	1	1	Hylobates lar
TI-564	564	K	210	0	TI-564	633			*	4	0	4	4	nitrophorin 1A precursor	s/	NR-LIGHT	6e-09	82.8	rhodnius biogenic aminebinding-like protein	4E-061	gi|307094890	236	197	211	55	94	89	1	9	14	1		N	FOR	Triatoma matogrossensis	Apolipoprotein D OS=Macaca fascicularis GN=APOD PE=2 SV=1	2E-004	sp|Q8SPI0|APOD_MACFA	46.2	160	189	24	85	137	25	27	30	1	Macaca fascicularis
TI-565	565	M	177	0	TI-565	530		ATG		4	0	4	4	rhodnius biogenic aminebinding-like protein	uc	NR-LIGHT	8e-48	84.8	rhodnius biogenic aminebinding-like protein	8E-048	gi|307094890	191	177	211	53	84	84	3	1	1	1		N	FOR	Triatoma matogrossensis	Apolipoprotein D OS=Macaca fascicularis GN=APOD PE=2 SV=1	0.002	sp|Q8SPI0|APOD_MACFA	42	112	189	26	60	99	24	27	24	1	Macaca fascicularis
TI-575	575	V	93	0	TI-575	276				4	2	2	2	mitochondrial ATPase subunit 6 - regulation of ATPase - neurological system process - muscle maintenance - determination of adult life span -	tr	GO	1e-21	41.5	truncated ATPase subunit 6	3E-034	gi|149898887	145	92	222	76	42	22	0	118	1	1		N	FOR	Triatoma infestans	ATP synthase subunit a OS=Aedes aegypti GN=mt:ATPase6 PE=2 SV=1	2E-021	sp|Q1HRS5|ATP6_AEDAE	100	91	226	53	41	43	1	122	3	1	Aedes aegypti
TI-90	90	L	226	0	TI-90	676				2	0	2	2	Probable G-protein coupled receptor 158	st	SWISSP	2e-11	13.1	CG31195	1E-098	gi|281362159	361	526	807	74	65	59	1	267	1	2		N	FOR	Drosophila melanogaster	Probable G-protein coupled receptor 158 OS=Mus musculus GN=Gpr158 PE=1 SV=2	2E-011	sp|Q8C419|GP158_MOUSE	68.9	140	1200	27	12	114	22	221	25	1	Mus musculus
TI-64	64	P	223	0	TI-64	667				2	0	2	2	heterogeneous nuclear ribonucleoprotein 87F-like	uc	NR-LIGHT	7e-62	51	heterogeneous nuclear ribonucleoprotein 87F-like	7E-062	gi|328709829	238	172	349	65	50	62	9	5	39	1		N	FOR	Acyrthosiphon pisum	Heterogeneous nuclear ribonucleoprotein A1 OS=Drosophila melanogaster GN=Hrb98DE	3E-059	sp|P07909|ROA1_DROME	228	178	365	60	49	72	2	22	35	2	Drosophila melanogaster
TI-587	587	I	53	0	TI-587	162			*	2	0	2	2	Unknown product	uk				mannose-1-phosphate guanyltransferase alpha-B	3.5	gi|41053852	32.7	61	422	33	15	41	16	196	3	1		N	FOR	Danio rerio
TI-583	583	L	44	0	TI-583	135			*	2	0	2	2	positive regulation of growth rate - hermaphrodite genitalia development - molting cycle collagen and cuticulin-based cuticle - nematode larval	extmat	GO	4e-11	10.5	eukaryotic initiation factor 4A-II, putative	5E-012	gi|242007840	72	41	449	78	9	9	0	408	2	1		N	FOR	Pediculus humanus corporis	ATP-dependent RNA helicase fal1 OS=Schizosaccharomyces pombe (strain ATCC 38366	5E-012	sp|Q10055|FAL1_SCHPO	69.7	41	394	69	11	13	0	353	2	1	Schizosaccharomyces pombe (strain ATCC 38366 / 972)
TI-575	575	V	93	0	TI-575	276				4	2	2	2	mitochondrial ATPase subunit 6 - regulation of ATPase - neurological system process - muscle maintenance - determination of adult life span -	tr	GO	1e-21	41.5	truncated ATPase subunit 6	3E-034	gi|149898887	145	92	222	76	42	22	0	118	1	1		N	FOR	Triatoma infestans	ATP synthase subunit a OS=Aedes aegypti GN=mt:ATPase6 PE=2 SV=1	2E-021	sp|Q1HRS5|ATP6_AEDAE	100	91	226	53	41	43	1	122	3	1	Aedes aegypti
TI-536	536	K	137	0	TI-536	414			*	3	1	2	2	CG41536 CG41536-PA	uc	NR-LIGHT	1e-28	50.3	similar to CG41536 CG41536-PA	1E-028	gi|189242281	127	78	159	77	50	18	1	79	5	1		N	FOR	Tribolium castaneum	Putative uncharacterized protein ART2 OS=Saccharomyces cerevisiae (strain ATCC	7E-010	sp|Q8TGM7|ART2_YEAST	62.4	52	61	58	87	22	0	6	19	1	Saccharomyces cerevisiae (strain ATCC 204508 / S288c)
TI-531	531	A	255	0	TI-531	768			*	3	1	2	2	Unknown product	uk				hypothetical protein DAPPUDRAFT_308200	2E-005	gi|321461569	51.6	114	450	26	26	84	7	37	36	1		N	FOR	Daphnia pulex
TI-449	449	G	149	0	TI-449	450			*	2	0	2	2	aldo-keto reductase family 1 member B1 (aldose reductase) - positive regulation of smooth muscle cell proliferation - positive regulation of	cs	GO	3e-32	47.7	aldo-keto reductase family 1 member B10-like	2E-039	gi|193601268	162	142	320	55	45	64	1	164	1	1		N	FOR	Acyrthosiphon pisum	Aldose reductase OS=Bos taurus GN=AKR1B1 PE=1 SV=1	7E-033	sp|P16116|ALDR_BOVIN	139	149	315	47	48	79	3	157	1	1	Bos taurus
TI-427	427	S	24	0	TI-427	75			*	2	0	2	2	Unknown product	uk
TI-40	40	A	233	0	TI-40	697				2	0	2	2	midasin - ribosomal large subunit assembly - rRNA processing - calcium ion binding - ATPase - ATP binding - nucleus	ps	GO	3e-41	3	hypothetical protein TcasGA2_TC012900	1E-074	gi|270016051	281	228	1457	62	16	87	10	1085	15	1		N	FOR	Tribolium castaneum	Midasin OS=Homo sapiens GN=MDN1 PE=1 SV=2	7E-053	sp|Q9NU22|MDN1_HUMAN	207	164	5596	60	3	66	7	5284	74	1	Homo sapiens
TI-387	387	K	15	0	TI-387	44				2	0	2	2	Unknown product	uk
TI-382	382	M	90	0	TI-382	273		ATG	*	2	0	2	2	CG9413 - amino acid transport - amino acid transmembrane transporter	tr	GO	3e-20	16.2	hypothetical protein TcasGA2_TC000583	2E-022	gi|270001710	106	89	533	54	17	41	0	444	1	1		N	FOR	Tribolium castaneum	B(0,+)-type amino acid transporter 1 OS=Homo sapiens GN=SLC7A9 PE=1 SV=1	8E-011	sp|P82251|BAT1_HUMAN	65.9	85	487	43	18	49	2	396	1	1	Homo sapiens
TI-360	360	M	124	0	TI-360	375		ATG	*	2	0	2	2	lola like - protein binding - chromatin silencing - nucleus - specific RNA polymerase II transcription factor - regulation of transcription from RNA	tm	GO	2e-53	92.9	similar to CG5738-PA	5E-056	gi|156550568	218	117	127	86	93	16	0	1	1	1		N	FOR	Acromyrmex echinatior	Longitudinals lacking protein-like OS=Drosophila melanogaster GN=lolal PE=1 SV=1	8E-053	sp|Q7KRI2|LOLAL_DROME	205	117	127	81	93	22	0	1	1	1	Drosophila melanogaster
TI-290	290	I	163	0	TI-290	491			*	2	0	2	2	Golgi SNAP receptor complex member 1 isoform 2	st	NR-LIGHT	9e-30	66.9	hypothetical protein DAPPUDRAFT_238099	4E-030	gi|321474467	132	150	237	50	64	78	11	7	12	1		N	FOR	Daphnia pulex	Golgi SNAP receptor complex member 1 OS=Pongo abelii GN=GOSR1 PE=2 SV=1	1E-029	sp|Q5RBL6|GOSR1_PONAB	129	163	248	46	66	88	13	5	9	1	Pongo abelii
TI-262	262	M	167	0	TI-262	498		ATG		3	1	2	2	Unknown product	uk				hypothetical protein	0.16	gi|256070610	37.4	98	727	30	14	70	10	619	23	1		N	FOR	Schistosoma mansoni
TI-241	241	C	263	0	TI-241	792			*	2	0	2	2	hypothetical protein AaeL_AAEL012646 Aedes aegypti	uc	NR-LIGHT	1e-11	83.7	hypothetical protein AaeL_AAEL012646	1E-011	gi|157133150	72.8	218	277	32	79	156	25	37	30	1		N	FOR	Aedes aegypti
TI-240	240	N	44	0	TI-240	135			*	2	0	2	2	Unknown product	uk
TI-219	219	K	69	0	TI-219	210			*	2	0	2	2	Pre-mRNA-splicing factor syf2	uc	SWISSP	3e-27	27.3	similar to GCIP-interacting protein p29 (P29)	6E-026	gi|118101581	118	67	252	82	27	12	0	185	2	1		N	FOR	Gallus gallus	Pre-mRNA-splicing factor syf2 OS=Gecko japonicus GN=syf2 PE=2 SV=1	3E-027	sp|Q6DV01|SYF2_GECJA	120	67	249	85	27	10	0	182	2	1	Gecko japonicus
TI-184	184	I	147	0	TI-184	440				2	0	2	2	DnaJ (Hsp40) homolog subfamily A member 3 - unfolded protein binding - positive regulation of T cell proliferation - T cell differentiation in the	tf	GO	3e-07	14.7	J domain-containing protein C21orf55, putative	3E-032	gi|242018813	139	113	367	60	31	45	4	33	38	1		N	FOR	Pediculus humanus corporis	DnaJ homolog subfamily C member 28 OS=Homo sapiens GN=DNAJC28 PE=1 SV=2	2E-015	sp|Q9NX36|DJC28_HUMAN	80.9	106	388	38	28	70	6	45	35	1	Homo sapiens
TI-183	183	P	195	1.53846	TI-183	588			*	2	0	2	2	cathepsin D	pm	NR-LIGHT	1e-49	50.2	cathepsin D	1E-049	gi|301030231	197	195	390	47	50	102	2	192	1	1		N	FOR	Triatoma infestans	Lysosomal aspartic protease OS=Aedes aegypti GN=AAEL006169 PE=1 SV=2	6E-036	sp|Q03168|ASPP_AEDAE	150	192	387	41	50	115	5	191	1	1	Aedes aegypti
TI-182	182	M	169	0	TI-182	510		ATG	*	2	0	2	2	tubulin polymerization promoting protein	cs	NR-LIGHT	4e-82	100	tubulin polymerization promoting protein	4E-082	gi|307095196	305	165	166	91	100	14	0	1	4	1		N	FOR	Triatoma matogrossensis	TPPP family protein CG4893 OS=Drosophila melanogaster GN=CG4893 PE=2 SV=1	3E-051	sp|Q9VV43|Y4893_DROME	200	144	192	67	76	48	2	48	20	1	Drosophila melanogaster
TI-168	168	F	32	0	TI-168	99			*	3	1	2	2	Unknown product	uk
TI-13	13	F	84	0	TI-13	255			*	2	0	2	2	Unknown product	uk
TI-123	123	D	155	0	TI-123	468			*	2	0	2	2	alpha-glucosidase binding-toxin receptor	s/	NR-LIGHT	5e-41	25.8	alpha-glucosidase binding-toxin receptor	5E-039	gi|159792926	161	150	588	48	26	79	2	59	1	1		N	FOR	Anopheles gambiae	Maltase 2 OS=Drosophila virilis GN=Mav2 PE=3 SV=1	2E-034	sp|O16099|MAL2_DROVI	144	149	524	46	29	81	3	67	1	1	Drosophila virilis
[truncated: 70 more columns]

## Sheet: down-reg
Protein name	Order Number	First residue	Seq size	%X	CDS name	Seq size	14 N's?	ATG?	*	Infected	Not Infected	Inf - nInf	Inf - nInf |H-I|	Description	uk	database	Evalue	coverage	Best match to NR-LIGHT protein database	E value	Match	Score	Extent of match	Length of best match	% identity	% Coverage	Mismatches	Gaps	First residue of match	First residue of sequence	Number of segments	Frame	Frame shift?	Orientation	Species of best match	Best match to SWISSP protein database	E value	Match	Score	Extent of match	Length of best match	% identity	% Coverage	Mismatches	Gaps	First residue of match	First residue of sequence	Number of segments	Species of best match
TI-84	84	V	186	0	TI-84	557				0	4	-4	4	Unknown product	uk				conserved Plasmodium protein, unknown function	3.4	gi|124511844	33.5	56	2206	33	3	41	5	649	29	1		N	FOR	Plasmodium falciparum 3D7
TI-126	126	F	265	0	TI-126	794				2	4	-2	2	NADH dehydrogenase I H subunit - NADH dehydrogenase (ubiquinone) - mitochondrial electron transport NADH to ubiquinone	met/energy	GO	2e-47	69.7	NADH dehydrogenase subunit I	1E-126	gi|291621807	454	260	303	89	86	28	0	1	2	1		N	FOR	Triatoma infestans	NADH-ubiquinone oxidoreductase chain 1 OS=Anopheles quadrimaculatus GN=ND1 PE=3	5E-089	sp|P33502|NU1M_ANOQU	327	260	314	61	83	101	0	8	2	1	Anopheles quadrimaculatus
TI-151	151	M	129	0	TI-151	390		ATG	*	1	5	-4	4	salivary secreted protein	s/	NR-LIGHT	4e-41	100	salivary secreted protein	4E-041	gi|149689094	168	128	129	65	100	44	1	1	1	1		N	FOR	Triatoma infestans
TI-152	152	S	200	0	TI-152	603			*	0	9	-9	9	hypothetical protein LOC100579034 partial	uc	NR-LIGHT	8e-24	22.7	hypothetical protein LOC100579034, partial	8E-024	gi|328790765	112	153	699	34	22	104	5	481	36	1		N	FOR	Apis mellifera	NMDA receptor-regulated protein 2 OS=Homo sapiens GN=NARG2 PE=1 SV=2	2E-005	sp|Q659A1|NARG2_HUMAN	49.3	99	982	27	10	75	3	773	78	1	Homo sapiens
TI-175	175	M	233	0	TI-175	702		ATG	*	0	2	-2	2	Unknown product	uk				conserved hypothetical protein	2E-005	gi|170057069	51.2	118	243	30	49	83	8	29	20	1		N	FOR	Culex quinquefasciatus
TI-217	217	G	180	0	TI-217	538				0	3	-3	3	truncated histone H1	nr	NR-LIGHT	2e-39	39	truncated histone H1	2E-039	gi|149689210	163	76	197	98	39	1	0	40	29	1		N	FOR	Triatoma infestans	Histone H1 OS=Drosophila melanogaster GN=His1 PE=1 SV=1	3E-025	sp|P02255|H1_DROME	114	74	256	68	29	24	0	46	29	1	Drosophila melanogaster
TI-231	231	M	143	0	TI-231	432		ATG	*	1	6	-5	5	hypothetical protein	uc	NR-LIGHT	1e-60	91.7	hypothetical protein	1E-060	gi|149898792	233	122	134	92	92	9	0	1	1	1		N	FOR	Triatoma infestans
TI-261	261	L	17	0	TI-261	54			*	0	4	-4	4	Unknown product	uk
TI-265	265	R	206	0	TI-265	621			*	1	12	-11	11	predicted RNA-binding protein	uc	NR-LIGHT	1e-31	44.3	predicted RNA-binding protein	1E-031	gi|149898790	138	132	300	57	44	56	0	140	1	1		N	FOR	Triatoma infestans
TI-276	276	A	15	0	TI-276	48			*	0	5	-5	5	Unknown product	uk
TI-283	283	C	232	0	TI-283	699			*	0	3	-3	3	Unknown product	uk				DNA primase	0.49	gi|322376486	37	76	567	28	14	55	1	160	99	1		N	FOR	Streptococcus sp. M334
TI-289	289	G	43	0	TI-289	132			*	1	5	-4	4	Unknown product	uk
TI-361	361	T	103	0	TI-361	312			*	1	4	-3	3	Unknown product	uk				AGAP000109-PA	1E-006	gi|333467316	54.3	60	90	40	68	36	0	24	41	1		N	FOR	Anopheles gambiae str. PEST	Cytochrome c oxidase subunit 7A1, mitochondrial OS=Saimiri sciureus GN=COX7A1	1E-004	sp|Q53CF6|CX7A1_SAISC	44.7	52	80	36	66	38	7	14	33	1	Saimiri sciureus
TI-424	424	M	105	0	TI-424	318		ATG	*	1	4	-3	3	Unknown product	uk				unnamed protein product	0.21	gi|10177771	36.6	45	326	34	14	33	4	128	56	1		N	FOR	Arabidopsis thaliana
TI-466	466	F	64	0	TI-466	192				0	3	-3	3	Unknown product	uk
TI-490	490	M	94	0	TI-490	285		ATG	*	0	5	-5	5	Defensin - extracellular space - positive regulation of biosynthetic process of antibacterial peptides active against Gram-positive bacteria -	imm	GO	6e-07	100	defensin	6E-049	gi|89112752	194	93	94	98	100	1	0	1	1	1		N	FOR	Triatoma infestans	Defensin OS=Pyrrhocoris apterus PE=1 SV=1	6E-011	sp|P37364|DEFI_PYRAP	66.2	42	43	62	100	16	0	1	52	1	Pyrrhocoris apterus
TI-495	495	M	208	0	TI-495	627		ATG	*	1	4	-3	3	40S ribosomal protein S8	ps	NR-LIGHT	0	100	40S ribosomal protein S8	1E-106	gi|149689088	387	207	208	91	100	17	0	1	1	1		N	FOR	Triatoma infestans	40S ribosomal protein S8 OS=Apis mellifera GN=RpS8 PE=2 SV=2	1E-090	sp|O76756|RS8_APIME	332	207	208	76	100	48	0	1	1	1	Apis mellifera
TI-548	548	M	315	0	TI-548	944		ATG		1	5	-4	4	Probable arginine kinase ZC434.8 - protein binding	met/energy	GO	0	87.2	arginine kinase	0.0	gi|116235665	646	314	356	97	88	7	0	1	1	1		N	FOR	Triatoma vitticeps	Arginine kinase OS=Schistocerca americana GN=ARGK PE=2 SV=1	1E-166	sp|P91798|KARG_SCHAM	585	314	356	86	88	43	0	1	1	1	Schistocerca americana
TI-573	573	X	138	0.724638	TI-573	417			*	1	8	-7	7	thioredoxin reductase isoform 2	uc	NR-LIGHT	4e-55	27.2	similar to thioredoxin reductase isoform 2	4E-055	gi|91079422	214	133	492	71	27	38	0	359	5	1		N	FOR	Tribolium castaneum	Thioredoxin reductase 2, mitochondrial OS=Bos taurus GN=TXNRD2 PE=1 SV=2	2E-051	sp|Q9N2I8|TRXR2_BOVIN	200	131	511	65	26	45	0	378	5	1	Bos taurus
TI-580	580	F	25	0	TI-580	78			*	0	5	-5	5	Unknown product	uk
TI-589	589	M	120	0	TI-589	363		ATG	*	0	7	-7	7	conserved hypothetical protein	uc	NR-LIGHT	5e-25	94.3	similar to conserved hypothetical protein	5E-025	gi|156538160	115	150	160	45	94	82	43	1	3	1		N	FOR	Nasonia vitripennis	Chromatin complexes subunit BAP18 OS=Homo sapiens GN=BAP18 PE=1 SV=1	2E-010	sp|Q8IXM2|BAP18_HUMAN	64.3	90	172	42	53	52	36	1	3	1	Homo sapiens
TI-89	89	N	11	0	TI-89	36			*	1	3	-2	2	Unknown product	uk
TI-535	535	I	41	0	TI-535	126			*	0	2	-2	2	Unknown product	uk
TI-469	469	M	195	0	TI-469	584		ATG	*	1	3	-2	2	Unknown product	uk				AGAP009281-PA	1E-010	gi|158300081	68.2	139	193	29	73	108	14	33	39	1		N	FOR	Anopheles gambiae str. PEST	Apolipoprotein D OS=Macaca fascicularis GN=APOD PE=2 SV=1	8E-010	sp|Q8SPI0|APOD_MACFA	63.5	139	189	28	74	113	28	15	28	1	Macaca fascicularis
TI-468	468	M	100	0	TI-468	303		ATG	*	0	2	-2	2	hypothetical protein	uc	NR-LIGHT	4e-24	82	hypothetical protein	4E-024	gi|149898849	112	81	100	68	82	26	0	1	1	1		N	FOR	Triatoma infestans
TI-450	450	M	169	0	TI-450	510		ATG	*	0	2	-2	2	ribosomal protein L35Ae Tribolium castaneum	ps	NR-LIGHT	2e-47	79.7	similar to ribosomal protein L35Ae	2E-047	gi|91094995	190	113	143	81	80	21	1	30	57	1		N	FOR	Tribolium castaneum	60S ribosomal protein L35a OS=Pongo abelii GN=RPL35A PE=3 SV=1	5E-036	sp|Q5R8K6|RL35A_PONAB	150	107	110	65	98	38	2	3	60	1	Pongo abelii
TI-447	447	K	211	0	TI-447	632				0	2	-2	2	Triosephosphate isomerase	uc	SWISSP	3e-69	69.3	triosephosphate isomerase	1E-068	gi|45382061	261	171	248	68	69	54	0	4	40	1		N	FOR	Gallus gallus	Triosephosphate isomerase OS=Gallus gallus GN=TPI1 PE=1 SV=2	3E-069	sp|P00940|TPIS_CHICK	261	171	248	68	69	54	0	4	40	1	Gallus gallus
TI-435	435	Y	102	0	TI-435	303				0	2	-2	2	Unknown product	uk				synaptic vesicle glycoprotein 2B-like isoform 1	7.7	gi|66499643	31.6	93	550	26	17	71	5	256	4	1		N	FOR	Apis mellifera
TI-433	433	X	125	4	TI-433	378			*	0	2	-2	2	Unknown product	uk				AGAP001637-PA	4E-006	gi|333470126	52.4	65	205	39	32	41	7	28	63	1		N	FOR	Anopheles gambiae str. PEST
TI-418	418	T	206	2.91262	TI-418	617				0	2	-2	2	60S acidic ribosomal protein P0	ps	NR-LIGHT	0	64	60S acidic ribosomal protein P0	1E-101	gi|263173401	371	204	320	88	64	24	0	15	1	1		N	FOR	Cimex lectularius	60S acidic ribosomal protein P0 OS=Ceratitis capitata GN=RpLP0 PE=3 SV=1	1E-089	sp|Q9U3U0|RLA0_CERCA	328	202	317	79	64	42	0	16	2	1	Ceratitis capitata
TI-417	417	M	159	0	TI-417	480		ATG	*	0	2	-2	2	TRAPP complex subunit Bet3 (predicted) - TRAPP complex - intracellular protein transport - ER to Golgi vesicle-mediated transport - molecular_function	pe	GO	1e-21	51	AGAP002385-PA	5E-058	gi|58383485	224	141	154	70	92	42	0	12	17	1		N	FOR	Anopheles gambiae str. PEST	Trafficking protein particle complex subunit 6B OS=Homo sapiens GN=TRAPPC6B PE=1	3E-042	sp|Q86SZ2|TPC6B_HUMAN	170	124	158	59	79	51	0	33	34	1	Homo sapiens
TI-403	403	M	81	0	TI-403	246		ATG	*	0	2	-2	2	Unknown product	uk
TI-287	287	F	48	0	TI-287	147			*	0	2	-2	2	Unknown product	uk
TI-272	272	K	151	0	TI-272	456			*	0	2	-2	2	Unknown product	uk				hypothetical protein	5.4	gi|72082777	32	47	290	30	17	34	4	205	94	1		N	FOR	Strongylocentrotus purpuratus
TI-242	242	S	167	0	TI-242	499				0	2	-2	2	inorganic phosphate cotransporter-like isoform 1	tr	NR-LIGHT	2e-33	17.9	putative inorganic phosphate cotransporter-like isoform 1	2E-033	gi|328709271	143	110	617	60	18	44	1	117	47	1		N	FOR	Acyrthosiphon pisum	Putative inorganic phosphate cotransporter OS=Drosophila melanogaster GN=Picot	2E-024	sp|Q9V7S5|PICO_DROME	111	93	529	56	18	43	6	37	59	1	Drosophila melanogaster
TI-216	216	M	58	0	TI-216	177		ATG	*	0	2	-2	2	hypothetical protein	uc	NR-LIGHT	4e-26	100	hypothetical protein	4E-026	gi|111379887	119	57	58	96	100	2	0	1	1	1		N	FOR	Triatoma brasiliensis
TI-209	209	G	66	0	TI-209	201			*	0	2	-2	2	Senescence-associated protein Brugia malayi	uc	NR-LIGHT	4e-26	50.4	Senescence-associated protein	4E-026	gi|170591136	119	60	121	90	50	6	0	1	1	1		N	FOR	Brugia malayi
TI-187	187	M	174	0	TI-187	525		ATG	*	0	2	-2	2	myosin regulatory light chain 2 smooth muscle Aedes aegypti	cs	NR-LIGHT	1e-80	83.6	myosin regulatory light chain 2 smooth muscle	1E-080	gi|157120145	300	173	208	82	84	30	0	1	1	1		N	FOR	Aedes aegypti	Myosin regulatory light chain sqh OS=Drosophila melanogaster GN=sqh PE=1 SV=1	2E-078	sp|P40423|SQH_DROME	291	173	174	80	100	34	0	1	1	1	Drosophila melanogaster
TI-126	126	F	265	0	TI-126	794				2	4	-2	2	NADH dehydrogenase I H subunit - NADH dehydrogenase (ubiquinone) - mitochondrial electron transport NADH to ubiquinone	met/energy	GO	2e-47	69.7	NADH dehydrogenase subunit I	1E-126	gi|291621807	454	260	303	89	86	28	0	1	2	1		N	FOR	Triatoma infestans	NADH-ubiquinone oxidoreductase chain 1 OS=Anopheles quadrimaculatus GN=ND1 PE=3	5E-089	sp|P33502|NU1M_ANOQU	327	260	314	61	83	101	0	8	2	1	Anopheles quadrimaculatus
[truncated: 70 more columns]
